# Supplementary material
Source: publisher figshare collection journal article supplement (https://acs.figshare.com/ndownloader/files/6864420)
Supplement: Supplementary file 1 [file 6864420]

data_cmpd_1

_audit_creation_method            'SHELXL-2014 & ZCIF'
_exptl_crystal_id                 'LD-2-68'
_chemical_name_systematic         'Mo-complex'
_chemical_formula_moiety          'C42 H60 Mo2 N6, C5 H12'
_chemical_formula_sum             'C47 H72 Mo2 N6'
_chemical_formula_weight          912.98

loop_
 _atom_type_symbol
 _atom_type_description
 _atom_type_scat_dispersion_real
 _atom_type_scat_dispersion_imag
 _atom_type_scat_source
 'C'  'C'   0.0033   0.0016
 'International Tables Vol C Tables 4.2.6.8 and 6.1.1.4'
 'H'  'H'   0.0000   0.0000
 'International Tables Vol C Tables 4.2.6.8 and 6.1.1.4'
 'N'  'N'   0.0061   0.0033
 'International Tables Vol C Tables 4.2.6.8 and 6.1.1.4'
 'Mo'  'Mo'  -1.6832   0.6857
 'International Tables Vol C Tables 4.2.6.8 and 6.1.1.4'

_space_group_crystal_system       triclinic
_space_group_IT_number            2
_space_group_name_H-M_alt         'P -1'
_space_group_name_Hall            '-P 1'
_symmetry_cell_setting            Triclinic
_symmetry_space_group_name_H-M    P-1

_shelx_space_group_comment
;
The symmetry employed for this shelxl refinement is uniquely defined
by the following loop, which should always be used as a source of
symmetry information in preference to the above space-group names.
They are only intended as comments.
;

loop_
 _space_group_symop_operation_xyz
 'x, y, z'
 '-x, -y, -z'

_cell_length_a                    9.0973(6)
_cell_length_b                    12.1312(8)
_cell_length_c                    12.6499(8)
_cell_angle_alpha                 61.9968(12)
_cell_angle_beta                  86.9618(13)
_cell_angle_gamma                 82.3284(12)
_cell_volume                      1221.50(14)
_cell_formula_units_Z             1
_cell_measurement_temperature     240(2)
_cell_measurement_reflns_used     10739
_cell_measurement_theta_min       2.8
_cell_measurement_theta_max       30.9

_exptl_crystal_description        plate
_exptl_crystal_colour             brown
_exptl_crystal_density_meas       ?
_exptl_crystal_density_method     'not measured'
_exptl_crystal_density_diffrn     1.241
_exptl_crystal_F_000              480
_exptl_transmission_factor_min    ?
_exptl_transmission_factor_max    ?
_exptl_crystal_size_max           0.52
_exptl_crystal_size_mid           0.31
_exptl_crystal_size_min           0.09
_exptl_absorpt_coefficient_mu     0.549
_shelx_estimated_absorpt_T_min    0.763
_shelx_estimated_absorpt_T_max    0.952
_exptl_absorpt_correction_type    multi-scan
_exptl_absorpt_correction_T_min   0.785
_exptl_absorpt_correction_T_max   0.952
_exptl_absorpt_process_details    'SADABS (Sheldrick, 2008)'

_diffrn_ambient_temperature       240(2)
_diffrn_radiation_wavelength      0.71073
_diffrn_radiation_type            MoK\a
_diffrn_source                    'sealed tube'
_diffrn_measurement_device_type   'Bruker Smart Apex II CCD'
_diffrn_measurement_method        '\f and \w scans'
_diffrn_detector_area_resol_mean  8.333
_diffrn_reflns_number             19881
_diffrn_reflns_av_unetI/netI      0.0199
_diffrn_reflns_av_R_equivalents   0.0218
_diffrn_reflns_limit_h_min        -11
_diffrn_reflns_limit_h_max        11
_diffrn_reflns_limit_k_min        -15
_diffrn_reflns_limit_k_max        15
_diffrn_reflns_limit_l_min        -16
_diffrn_reflns_limit_l_max        16
_diffrn_reflns_theta_min          2.777
_diffrn_reflns_theta_max          27.495
_diffrn_reflns_theta_full         26.500
_diffrn_measured_fraction_theta_max   0.999
_diffrn_measured_fraction_theta_full  0.999
_diffrn_reflns_Laue_measured_fraction_max    0.999
_diffrn_reflns_Laue_measured_fraction_full   0.999
_diffrn_reflns_point_group_measured_fraction_max   0.999
_diffrn_reflns_point_group_measured_fraction_full  0.999
_reflns_number_total              5607
_reflns_number_gt                 4917
_reflns_threshold_expression      'I > 2\s(I)'
_reflns_Friedel_coverage          0.000
_reflns_Friedel_fraction_max      .
_reflns_Friedel_fraction_full     .

_reflns_special_details
;
 Reflections were merged by SHELXL according to the crystal
 class for the calculation of statistics and refinement.

 Structure factors included contributions from the .fab file.

 _reflns_Friedel_fraction is defined as the number of unique
 Friedel pairs measured divided by the number that would be
 possible theoretically, ignoring centric projections and
 systematic absences.
;

_computing_data_collection        'Apex2 (Bruker, 2010)'
_computing_cell_refinement        Apex2
_computing_data_reduction         'Apex2, Saint'
_computing_structure_solution     'ShelXS-97 (Sheldrick, 2008)'
_computing_structure_refinement   'ShelXL-2014 (Sheldrick, 2014)'
_computing_molecular_graphics     'XSHEL (Bruker, 2004)'
_computing_publication_material   'Apex2, SHELXL-2014, Platon (Spek, 1990)'
_refine_special_details           
;
The structure contains pentane solvent molecule heavily disordered around
inversion center at 0,0,0. It was accounted for by applying SQUEEZE
procedure from Platon software (Spek, 1990). Removed electron density of
42 electrons per unit cell corresponds to one pentane molecule. It was
added to final composition in order to obtain accurate density, absorption
coefficient and number of electrons per unit cell (F000).

H atoms were positioned from geometric considerations and refined as riding
on the attached atoms with Uiso constrained to be 20% (50% for methyl 
group) larger than Uqev of the attached atom. Orientation of methyl group
was optimized.
;
_refine_ls_structure_factor_coef  Fsqd
_refine_ls_matrix_type            full
_refine_ls_weighting_scheme       calc
_refine_ls_weighting_details
'w=1/[\s^2^(Fo^2^)+(0.0100P)^2^+1.2070P] where P=(Fo^2^+2Fc^2^)/3'
_atom_sites_solution_primary      direct
_atom_sites_solution_secondary    difmap
_atom_sites_solution_hydrogens    geom
_refine_ls_hydrogen_treatment     constr
_refine_ls_extinction_method      none
_refine_ls_extinction_coef        .
_refine_ls_number_reflns          5607
_refine_ls_number_parameters      233
_refine_ls_number_restraints      0
_refine_ls_R_factor_all           0.0351
_refine_ls_R_factor_gt            0.0287
_refine_ls_wR_factor_ref          0.0671
_refine_ls_wR_factor_gt           0.0626
_refine_ls_goodness_of_fit_ref    1.000
_refine_ls_restrained_S_all       1.000
_refine_ls_shift/su_max           0.001
_refine_ls_shift/su_mean          0.000

loop_
 _atom_site_label
 _atom_site_type_symbol
 _atom_site_fract_x
 _atom_site_fract_y
 _atom_site_fract_z
 _atom_site_U_iso_or_equiv
 _atom_site_adp_type
 _atom_site_occupancy
 _atom_site_site_symmetry_order
 _atom_site_calc_flag
 _atom_site_refinement_flags_posn
 _atom_site_refinement_flags_adp
 _atom_site_refinement_flags_occupancy
 _atom_site_disorder_assembly
 _atom_site_disorder_group
Mo1 Mo 0.39896(2) 0.21980(2) 0.41082(2) 0.04235(6) Uani 1 1 d . . . . .
N1 N 0.4720(2) 0.05804(17) 0.47090(16) 0.0458(4) Uani 1 1 d . . . . .
C1 C 0.3152(2) 0.2882(2) 0.1937(2) 0.0466(5) Uani 1 1 d . . . . .
C2 C 0.2747(3) 0.3070(2) 0.0728(2) 0.0518(5) Uani 1 1 d . . . . .
C3 C 0.1813(3) 0.4131(3) -0.0016(2) 0.0665(7) Uani 1 1 d . . . . .
H3 H 0.1439 0.4716 0.0252 0.080 Uiso 1 1 calc R U . . .
C4 C 0.1422(4) 0.4344(4) -0.1135(3) 0.0852(10) Uani 1 1 d . . . . .
H4 H 0.0787 0.5070 -0.1627 0.102 Uiso 1 1 calc R U . . .
C5 C 0.1949(4) 0.3515(4) -0.1525(3) 0.0893(11) Uani 1 1 d . . . . .
H5 H 0.1669 0.3663 -0.2289 0.107 Uiso 1 1 calc R U . . .
C6 C 0.2884(4) 0.2460(4) -0.0831(3) 0.0957(11) Uani 1 1 d . . . . .
H6 H 0.3252 0.1891 -0.1120 0.115 Uiso 1 1 calc R U . . .
C7 C 0.3294(4) 0.2231(3) 0.0321(3) 0.0778(8) Uani 1 1 d . . . . .
H7 H 0.3938 0.1508 0.0806 0.093 Uiso 1 1 calc R U . . .
N8 N 0.2256(2) 0.25347(19) 0.28676(17) 0.0501(4) Uani 1 1 d . . . . .
C9 C 0.0848(3) 0.2076(3) 0.2912(2) 0.0574(6) Uani 1 1 d . . . . .
H9A H 0.0432 0.2463 0.2099 0.069 Uiso 1 1 calc R U . . .
H9B H 0.0154 0.2337 0.3395 0.069 Uiso 1 1 calc R U . . .
C10 C 0.0982(4) 0.0677(3) 0.3427(4) 0.0921(11) Uani 1 1 d . . . . .
H10A H 0.1553 0.0422 0.2892 0.138 Uiso 1 1 calc R U . . .
H10B H 0.0000 0.0415 0.3523 0.138 Uiso 1 1 calc R U . . .
H10C H 0.1478 0.0287 0.4200 0.138 Uiso 1 1 calc R U . . .
N11 N 0.4455(2) 0.30420(19) 0.22277(18) 0.0531(5) Uani 1 1 d . . . . .
C12 C 0.5710(3) 0.3392(3) 0.1434(3) 0.0655(7) Uani 1 1 d . . . . .
H12A H 0.6026 0.4154 0.1390 0.079 Uiso 1 1 calc R U . . .
H12B H 0.5407 0.3584 0.0627 0.079 Uiso 1 1 calc R U . . .
C13 C 0.6987(3) 0.2364(4) 0.1854(4) 0.1051(13) Uani 1 1 d . . . . .
H13A H 0.7247 0.2134 0.2671 0.158 Uiso 1 1 calc R U . . .
H13B H 0.7832 0.2655 0.1341 0.158 Uiso 1 1 calc R U . . .
H13C H 0.6708 0.1636 0.1820 0.158 Uiso 1 1 calc R U . . .
C20 C 0.2712(3) 0.3876(2) 0.4419(2) 0.0543(6) Uani 1 1 d . . . . .
C21 C 0.4157(3) 0.4177(2) 0.4074(3) 0.0609(7) Uani 1 1 d . . . . .
C22 C 0.5183(3) 0.3192(3) 0.4890(3) 0.0609(7) Uani 1 1 d . . . . .
C23 C 0.4329(3) 0.2286(2) 0.5782(2) 0.0550(6) Uani 1 1 d . . . . .
C24 C 0.2778(3) 0.2686(2) 0.5472(2) 0.0518(5) Uani 1 1 d . . . . .
C25 C 0.1307(3) 0.4663(3) 0.3766(3) 0.0784(9) Uani 1 1 d . . . . .
H25A H 0.0531 0.4127 0.3941 0.118 Uiso 1 1 calc R U . . .
H25B H 0.1483 0.5075 0.2911 0.118 Uiso 1 1 calc R U . . .
H25C H 0.1002 0.5293 0.4027 0.118 Uiso 1 1 calc R U . . .
C26 C 0.4563(4) 0.5337(3) 0.2993(3) 0.0963(11) Uani 1 1 d . . . . .
H26A H 0.3774 0.5658 0.2398 0.144 Uiso 1 1 calc R U . . .
H26B H 0.5476 0.5127 0.2658 0.144 Uiso 1 1 calc R U . . .
H26C H 0.4701 0.5973 0.3225 0.144 Uiso 1 1 calc R U . . .
C27 C 0.6840(3) 0.3226(4) 0.4924(4) 0.0959(12) Uani 1 1 d . . . . .
H27A H 0.7029 0.3743 0.5287 0.144 Uiso 1 1 calc R U . . .
H27B H 0.7219 0.3579 0.4115 0.144 Uiso 1 1 calc R U . . .
H27C H 0.7330 0.2379 0.5392 0.144 Uiso 1 1 calc R U . . .
C28 C 0.4936(4) 0.1141(3) 0.6900(3) 0.0800(9) Uani 1 1 d . . . . .
H28A H 0.5881 0.0786 0.6727 0.120 Uiso 1 1 calc R U . . .
H28B H 0.4244 0.0521 0.7175 0.120 Uiso 1 1 calc R U . . .
H28C H 0.5075 0.1378 0.7518 0.120 Uiso 1 1 calc R U . . .
C29 C 0.1481(3) 0.2106(3) 0.6221(3) 0.0744(8) Uani 1 1 d . . . . .
H29A H 0.1167 0.2514 0.6710 0.112 Uiso 1 1 calc R U . . .
H29B H 0.1771 0.1216 0.6734 0.112 Uiso 1 1 calc R U . . .
H29C H 0.0668 0.2214 0.5701 0.112 Uiso 1 1 calc R U . . .

loop_
 _atom_site_aniso_label
 _atom_site_aniso_U_11
 _atom_site_aniso_U_22
 _atom_site_aniso_U_33
 _atom_site_aniso_U_23
 _atom_site_aniso_U_13
 _atom_site_aniso_U_12
Mo1 0.04426(10) 0.03965(10) 0.04668(11) -0.02313(8) -0.00702(7) -0.00208(7)
N1 0.0517(11) 0.0489(10) 0.0458(10) -0.0295(9) -0.0061(8) -0.0041(8)
C1 0.0421(11) 0.0457(12) 0.0499(13) -0.0208(10) -0.0066(10) -0.0024(9)
C2 0.0462(12) 0.0618(15) 0.0506(13) -0.0270(12) 0.0012(10) -0.0147(11)
C3 0.0660(17) 0.0719(18) 0.0583(16) -0.0270(14) -0.0124(13) -0.0056(14)
C4 0.089(2) 0.096(2) 0.0615(18) -0.0273(18) -0.0212(16) -0.0146(19)
C5 0.096(3) 0.116(3) 0.0607(19) -0.039(2) -0.0062(18) -0.038(2)
C6 0.110(3) 0.119(3) 0.096(3) -0.079(3) 0.016(2) -0.028(2)
C7 0.086(2) 0.081(2) 0.077(2) -0.0465(18) -0.0031(16) -0.0046(17)
N8 0.0412(10) 0.0605(12) 0.0514(11) -0.0275(10) -0.0036(8) -0.0089(9)
C9 0.0414(12) 0.0733(17) 0.0636(15) -0.0351(14) 0.0017(11) -0.0147(11)
C10 0.077(2) 0.079(2) 0.127(3) -0.049(2) 0.003(2) -0.0294(17)
N11 0.0420(10) 0.0630(13) 0.0509(11) -0.0220(10) -0.0037(8) -0.0114(9)
C12 0.0499(14) 0.0829(19) 0.0657(17) -0.0334(15) 0.0044(12) -0.0212(13)
C13 0.0506(17) 0.135(3) 0.117(3) -0.052(3) 0.0081(18) -0.0003(19)
C20 0.0585(14) 0.0474(13) 0.0667(16) -0.0357(12) -0.0064(12) 0.0009(11)
C21 0.0695(17) 0.0466(13) 0.0774(18) -0.0372(13) 0.0072(14) -0.0119(12)
C22 0.0530(14) 0.0650(16) 0.0876(19) -0.0537(15) -0.0011(13) -0.0100(12)
C23 0.0624(15) 0.0578(14) 0.0572(14) -0.0378(12) -0.0133(12) 0.0008(12)
C24 0.0572(14) 0.0529(13) 0.0570(14) -0.0356(12) -0.0015(11) -0.0051(11)
C25 0.0756(19) 0.0659(18) 0.096(2) -0.0446(17) -0.0196(17) 0.0172(15)
C26 0.122(3) 0.0549(18) 0.114(3) -0.0397(19) 0.031(2) -0.0289(19)
C27 0.0565(17) 0.128(3) 0.153(3) -0.104(3) -0.0022(19) -0.0203(18)
C28 0.098(2) 0.085(2) 0.0619(17) -0.0430(16) -0.0282(16) 0.0169(17)
C29 0.079(2) 0.084(2) 0.078(2) -0.0506(17) 0.0181(16) -0.0229(16)

_geom_special_details
;
 All esds (except the esd in the dihedral angle between two l.s. planes)
 are estimated using the full covariance matrix.  The cell esds are taken
 into account individually in the estimation of esds in distances, angles
 and torsion angles; correlations between esds in cell parameters are only
 used when they are defined by crystal symmetry.  An approximate (isotropic)
 treatment of cell esds is used for estimating esds involving l.s. planes.
;

loop_
 _geom_bond_atom_site_label_1
 _geom_bond_atom_site_label_2
 _geom_bond_distance
 _geom_bond_site_symmetry_2
 _geom_bond_publ_flag
Mo1 N1 1.7818(17) . ?
Mo1 N8 2.1457(18) . ?
Mo1 N11 2.147(2) . ?
Mo1 C23 2.209(2) . ?
Mo1 C24 2.264(2) . ?
Mo1 C22 2.280(2) . ?
Mo1 C20 2.392(2) . ?
Mo1 C21 2.406(2) . ?
Mo1 C1 2.593(2) . ?
N1 N1 1.288(3) 2_656 ?
C1 N8 1.323(3) . ?
C1 N11 1.323(3) . ?
C1 C2 1.496(3) . ?
C2 C7 1.371(4) . ?
C2 C3 1.386(4) . ?
C3 C4 1.372(4) . ?
C3 H3 0.9400 . ?
C4 C5 1.340(5) . ?
C4 H4 0.9400 . ?
C5 C6 1.366(5) . ?
C5 H5 0.9400 . ?
C6 C7 1.411(5) . ?
C6 H6 0.9400 . ?
C7 H7 0.9400 . ?
N8 C9 1.452(3) . ?
C9 C10 1.494(4) . ?
C9 H9A 0.9800 . ?
C9 H9B 0.9800 . ?
C10 H10A 0.9700 . ?
C10 H10B 0.9700 . ?
C10 H10C 0.9700 . ?
N11 C12 1.449(3) . ?
C12 C13 1.498(4) . ?
C12 H12A 0.9800 . ?
C12 H12B 0.9800 . ?
C13 H13A 0.9700 . ?
C13 H13B 0.9700 . ?
C13 H13C 0.9700 . ?
C20 C21 1.403(4) . ?
C20 C24 1.429(3) . ?
C20 C25 1.508(3) . ?
C21 C22 1.418(4) . ?
C21 C26 1.505(4) . ?
C22 C23 1.434(4) . ?
C22 C27 1.516(4) . ?
C23 C24 1.442(3) . ?
C23 C28 1.506(4) . ?
C24 C29 1.504(4) . ?
C25 H25A 0.9700 . ?
C25 H25B 0.9700 . ?
C25 H25C 0.9700 . ?
C26 H26A 0.9700 . ?
C26 H26B 0.9700 . ?
C26 H26C 0.9700 . ?
C27 H27A 0.9700 . ?
C27 H27B 0.9700 . ?
C27 H27C 0.9700 . ?
C28 H28A 0.9700 . ?
C28 H28B 0.9700 . ?
C28 H28C 0.9700 . ?
C29 H29A 0.9700 . ?
C29 H29B 0.9700 . ?
C29 H29C 0.9700 . ?

loop_
 _geom_angle_atom_site_label_1
 _geom_angle_atom_site_label_2
 _geom_angle_atom_site_label_3
 _geom_angle
 _geom_angle_site_symmetry_1
 _geom_angle_site_symmetry_3
 _geom_angle_publ_flag
N1 Mo1 N8 107.04(8) . . ?
N1 Mo1 N11 106.18(8) . . ?
N8 Mo1 N11 60.84(7) . . ?
N1 Mo1 C23 94.25(9) . . ?
N8 Mo1 C23 140.31(9) . . ?
N11 Mo1 C23 144.10(9) . . ?
N1 Mo1 C24 113.42(9) . . ?
N8 Mo1 C24 102.73(8) . . ?
N11 Mo1 C24 140.24(8) . . ?
C23 Mo1 C24 37.58(9) . . ?
N1 Mo1 C22 111.27(9) . . ?
N8 Mo1 C22 141.69(9) . . ?
N11 Mo1 C22 106.97(9) . . ?
C23 Mo1 C22 37.21(10) . . ?
C24 Mo1 C22 61.96(9) . . ?
N1 Mo1 C20 148.97(9) . . ?
N8 Mo1 C20 87.83(8) . . ?
N11 Mo1 C20 104.85(9) . . ?
C23 Mo1 C20 59.56(9) . . ?
C24 Mo1 C20 35.62(9) . . ?
C22 Mo1 C20 58.84(9) . . ?
N1 Mo1 C21 146.34(9) . . ?
N8 Mo1 C21 106.60(9) . . ?
N11 Mo1 C21 89.34(9) . . ?
C23 Mo1 C21 59.30(10) . . ?
C24 Mo1 C21 59.23(9) . . ?
C22 Mo1 C21 35.09(9) . . ?
C20 Mo1 C21 34.01(9) . . ?
N1 Mo1 C1 105.70(7) . . ?
N8 Mo1 C1 30.62(7) . . ?
N11 Mo1 C1 30.62(7) . . ?
C23 Mo1 C1 159.95(8) . . ?
C24 Mo1 C1 127.69(8) . . ?
C22 Mo1 C1 131.44(9) . . ?
C20 Mo1 C1 100.77(8) . . ?
C21 Mo1 C1 102.63(9) . . ?
N1 N1 Mo1 171.3(2) 2_656 . ?
N8 C1 N11 110.4(2) . . ?
N8 C1 C2 124.7(2) . . ?
N11 C1 C2 124.8(2) . . ?
N8 C1 Mo1 55.67(11) . . ?
N11 C1 Mo1 55.72(12) . . ?
C2 C1 Mo1 171.09(17) . . ?
C7 C2 C3 118.6(3) . . ?
C7 C2 C1 121.9(2) . . ?
C3 C2 C1 119.5(2) . . ?
C4 C3 C2 121.3(3) . . ?
C4 C3 H3 119.3 . . ?
C2 C3 H3 119.3 . . ?
C5 C4 C3 119.8(3) . . ?
C5 C4 H4 120.1 . . ?
C3 C4 H4 120.1 . . ?
C4 C5 C6 121.2(3) . . ?
C4 C5 H5 119.4 . . ?
C6 C5 H5 119.4 . . ?
C5 C6 C7 119.5(3) . . ?
C5 C6 H6 120.3 . . ?
C7 C6 H6 120.3 . . ?
C2 C7 C6 119.5(3) . . ?
C2 C7 H7 120.2 . . ?
C6 C7 H7 120.2 . . ?
C1 N8 C9 124.1(2) . . ?
C1 N8 Mo1 93.71(13) . . ?
C9 N8 Mo1 136.91(16) . . ?
N8 C9 C10 113.0(2) . . ?
N8 C9 H9A 109.0 . . ?
C10 C9 H9A 109.0 . . ?
N8 C9 H9B 109.0 . . ?
C10 C9 H9B 109.0 . . ?
H9A C9 H9B 107.8 . . ?
C9 C10 H10A 109.5 . . ?
C9 C10 H10B 109.5 . . ?
H10A C10 H10B 109.5 . . ?
C9 C10 H10C 109.5 . . ?
H10A C10 H10C 109.5 . . ?
H10B C10 H10C 109.5 . . ?
C1 N11 C12 125.2(2) . . ?
C1 N11 Mo1 93.66(14) . . ?
C12 N11 Mo1 139.46(16) . . ?
N11 C12 C13 111.7(2) . . ?
N11 C12 H12A 109.3 . . ?
C13 C12 H12A 109.3 . . ?
N11 C12 H12B 109.3 . . ?
C13 C12 H12B 109.3 . . ?
H12A C12 H12B 107.9 . . ?
C12 C13 H13A 109.5 . . ?
C12 C13 H13B 109.5 . . ?
H13A C13 H13B 109.5 . . ?
C12 C13 H13C 109.5 . . ?
H13A C13 H13C 109.5 . . ?
H13B C13 H13C 109.5 . . ?
C21 C20 C24 109.3(2) . . ?
C21 C20 C25 125.6(3) . . ?
C24 C20 C25 125.0(3) . . ?
C21 C20 Mo1 73.52(14) . . ?
C24 C20 Mo1 67.29(13) . . ?
C25 C20 Mo1 124.06(18) . . ?
C20 C21 C22 109.0(2) . . ?
C20 C21 C26 125.7(3) . . ?
C22 C21 C26 125.2(3) . . ?
C20 C21 Mo1 72.47(13) . . ?
C22 C21 Mo1 67.60(13) . . ?
C26 C21 Mo1 124.6(2) . . ?
C21 C22 C23 106.8(2) . . ?
C21 C22 C27 125.5(3) . . ?
C23 C22 C27 126.9(3) . . ?
C21 C22 Mo1 77.31(15) . . ?
C23 C22 Mo1 68.72(13) . . ?
C27 C22 Mo1 127.43(19) . . ?
C22 C23 C24 108.9(2) . . ?
C22 C23 C28 125.9(3) . . ?
C24 C23 C28 125.2(3) . . ?
C22 C23 Mo1 74.07(14) . . ?
C24 C23 Mo1 73.27(13) . . ?
C28 C23 Mo1 121.60(17) . . ?
C20 C24 C23 105.9(2) . . ?
C20 C24 C29 126.1(2) . . ?
C23 C24 C29 127.1(2) . . ?
C20 C24 Mo1 77.10(14) . . ?
C23 C24 Mo1 69.16(13) . . ?
C29 C24 Mo1 127.21(17) . . ?
C20 C25 H25A 109.5 . . ?
C20 C25 H25B 109.5 . . ?
H25A C25 H25B 109.5 . . ?
C20 C25 H25C 109.5 . . ?
H25A C25 H25C 109.5 . . ?
H25B C25 H25C 109.5 . . ?
C21 C26 H26A 109.5 . . ?
C21 C26 H26B 109.5 . . ?
H26A C26 H26B 109.5 . . ?
C21 C26 H26C 109.5 . . ?
H26A C26 H26C 109.5 . . ?
H26B C26 H26C 109.5 . . ?
C22 C27 H27A 109.5 . . ?
C22 C27 H27B 109.5 . . ?
H27A C27 H27B 109.5 . . ?
C22 C27 H27C 109.5 . . ?
H27A C27 H27C 109.5 . . ?
H27B C27 H27C 109.5 . . ?
C23 C28 H28A 109.5 . . ?
C23 C28 H28B 109.5 . . ?
H28A C28 H28B 109.5 . . ?
C23 C28 H28C 109.5 . . ?
H28A C28 H28C 109.5 . . ?
H28B C28 H28C 109.5 . . ?
C24 C29 H29A 109.5 . . ?
C24 C29 H29B 109.5 . . ?
H29A C29 H29B 109.5 . . ?
C24 C29 H29C 109.5 . . ?
H29A C29 H29C 109.5 . . ?
H29B C29 H29C 109.5 . . ?

loop_
 _geom_torsion_atom_site_label_1
 _geom_torsion_atom_site_label_2
 _geom_torsion_atom_site_label_3
 _geom_torsion_atom_site_label_4
 _geom_torsion
 _geom_torsion_site_symmetry_1
 _geom_torsion_site_symmetry_2
 _geom_torsion_site_symmetry_3
 _geom_torsion_site_symmetry_4
 _geom_torsion_publ_flag
N8 C1 C2 C7 -106.6(3) . . . . ?
N11 C1 C2 C7 73.5(3) . . . . ?
N8 C1 C2 C3 74.6(3) . . . . ?
N11 C1 C2 C3 -105.3(3) . . . . ?
C7 C2 C3 C4 0.6(4) . . . . ?
C1 C2 C3 C4 179.5(3) . . . . ?
C2 C3 C4 C5 0.0(5) . . . . ?
C3 C4 C5 C6 -0.6(6) . . . . ?
C4 C5 C6 C7 0.6(6) . . . . ?
C3 C2 C7 C6 -0.6(4) . . . . ?
C1 C2 C7 C6 -179.5(3) . . . . ?
C5 C6 C7 C2 0.1(5) . . . . ?
N11 C1 N8 C9 -168.9(2) . . . . ?
C2 C1 N8 C9 11.2(4) . . . . ?
Mo1 C1 N8 C9 -158.0(3) . . . . ?
N11 C1 N8 Mo1 -10.9(2) . . . . ?
C2 C1 N8 Mo1 169.2(2) . . . . ?
C1 N8 C9 C10 91.6(3) . . . . ?
Mo1 N8 C9 C10 -55.3(3) . . . . ?
N8 C1 N11 C12 178.4(2) . . . . ?
C2 C1 N11 C12 -1.6(4) . . . . ?
Mo1 C1 N11 C12 167.6(3) . . . . ?
N8 C1 N11 Mo1 10.9(2) . . . . ?
C2 C1 N11 Mo1 -169.2(2) . . . . ?
C1 N11 C12 C13 -114.7(3) . . . . ?
Mo1 N11 C12 C13 46.0(4) . . . . ?
C24 C20 C21 C22 0.1(3) . . . . ?
C25 C20 C21 C22 -178.3(2) . . . . ?
Mo1 C20 C21 C22 -57.88(17) . . . . ?
C24 C20 C21 C26 178.4(3) . . . . ?
C25 C20 C21 C26 0.0(4) . . . . ?
Mo1 C20 C21 C26 120.5(3) . . . . ?
C24 C20 C21 Mo1 57.96(16) . . . . ?
C25 C20 C21 Mo1 -120.4(3) . . . . ?
C20 C21 C22 C23 -2.0(3) . . . . ?
C26 C21 C22 C23 179.7(3) . . . . ?
Mo1 C21 C22 C23 -62.83(16) . . . . ?
C20 C21 C22 C27 -171.9(3) . . . . ?
C26 C21 C22 C27 9.7(4) . . . . ?
Mo1 C21 C22 C27 127.2(3) . . . . ?
C20 C21 C22 Mo1 60.87(18) . . . . ?
C26 C21 C22 Mo1 -117.5(3) . . . . ?
C21 C22 C23 C24 3.1(3) . . . . ?
C27 C22 C23 C24 172.9(2) . . . . ?
Mo1 C22 C23 C24 -65.55(16) . . . . ?
C21 C22 C23 C28 -173.6(2) . . . . ?
C27 C22 C23 C28 -3.8(4) . . . . ?
Mo1 C22 C23 C28 117.8(2) . . . . ?
C21 C22 C23 Mo1 68.66(17) . . . . ?
C27 C22 C23 Mo1 -121.5(3) . . . . ?
C21 C20 C24 C23 1.8(3) . . . . ?
C25 C20 C24 C23 -179.8(2) . . . . ?
Mo1 C20 C24 C23 63.60(15) . . . . ?
C21 C20 C24 C29 171.3(2) . . . . ?
C25 C20 C24 C29 -10.3(4) . . . . ?
Mo1 C20 C24 C29 -126.9(2) . . . . ?
C21 C20 C24 Mo1 -61.78(18) . . . . ?
C25 C20 C24 Mo1 116.6(2) . . . . ?
C22 C23 C24 C20 -3.0(3) . . . . ?
C28 C23 C24 C20 173.7(2) . . . . ?
Mo1 C23 C24 C20 -69.10(16) . . . . ?
C22 C23 C24 C29 -172.4(2) . . . . ?
C28 C23 C24 C29 4.3(4) . . . . ?
Mo1 C23 C24 C29 121.6(2) . . . . ?
C22 C23 C24 Mo1 66.07(16) . . . . ?
C28 C23 C24 Mo1 -117.2(2) . . . . ?

_refine_diff_density_max    1.257
_refine_diff_density_min   -0.342
_refine_diff_density_rms    0.050

_shelx_res_file
;

    as.res created by SHELXL-2014/7


TITL as in P-1
CELL 0.71073   9.0973  12.1312  12.6499  61.9968   86.9618   82.3284
ZERR    1.00   0.0006   0.0008   0.0008   0.0012    0.0013    0.0012
LATT 1
SFAC C  H  N  Mo
UNIT 47 72 6 2
REM
REM squeeze removed 45 e/cell which correspond to 1 pentane molecule
REM that was added to final composition to obtain correct density,
REM absorption coefficient and F000 - no. of electrons in the unit cell,
REM
OMIT  -3.00  55.00
L.S. 5
ACTA 53
ABIN
BOND $H
CONF
FMAP 2
PLAN 20
SIZE 0.09 0.31 0.52
TEMP -33.150
WGHT    0.010000    1.207000
FVAR       0.23070
MO1   4    0.398956    0.219796    0.410818    11.00000    0.04426    0.03965 =
         0.04668   -0.02313   -0.00702   -0.00208
N1    3    0.472017    0.058039    0.470902    11.00000    0.05165    0.04893 =
         0.04576   -0.02946   -0.00614   -0.00406
C1    1    0.315229    0.288233    0.193736    11.00000    0.04205    0.04573 =
         0.04994   -0.02076   -0.00656   -0.00244
C2    1    0.274708    0.306993    0.072825    11.00000    0.04617    0.06183 =
         0.05060   -0.02703    0.00122   -0.01468
C3    1    0.181294    0.413081   -0.001576    11.00000    0.06601    0.07188 =
         0.05828   -0.02704   -0.01242   -0.00559
AFIX  43
H3    2    0.143922    0.471629    0.025176    11.00000   -1.20000
AFIX   0
C4    1    0.142216    0.434433   -0.113514    11.00000    0.08948    0.09646 =
         0.06146   -0.02727   -0.02120   -0.01457
AFIX  43
H4    2    0.078712    0.506976   -0.162709    11.00000   -1.20000
AFIX   0
C5    1    0.194873    0.351543   -0.152452    11.00000    0.09635    0.11615 =
         0.06067   -0.03856   -0.00615   -0.03800
AFIX  43
H5    2    0.166932    0.366285   -0.228913    11.00000   -1.20000
AFIX   0
C6    1    0.288424    0.245979   -0.083126    11.00000    0.10989    0.11872 =
         0.09557   -0.07862    0.01636   -0.02774
AFIX  43
H6    2    0.325167    0.189061   -0.111966    11.00000   -1.20000
AFIX   0
C7    1    0.329435    0.223088    0.032092    11.00000    0.08593    0.08100 =
         0.07683   -0.04652   -0.00306   -0.00456
AFIX  43
H7    2    0.393811    0.150836    0.080572    11.00000   -1.20000
AFIX   0
N8    3    0.225644    0.253474    0.286758    11.00000    0.04118    0.06054 =
         0.05138   -0.02747   -0.00360   -0.00894
C9    1    0.084769    0.207558    0.291158    11.00000    0.04141    0.07327 =
         0.06362   -0.03513    0.00171   -0.01472
AFIX  23
H9A   2    0.043237    0.246258    0.209900    11.00000   -1.20000
H9B   2    0.015449    0.233709    0.339512    11.00000   -1.20000
AFIX   0
C10   1    0.098151    0.067737    0.342665    11.00000    0.07711    0.07904 =
         0.12703   -0.04905    0.00269   -0.02935
AFIX 137
H10A  2    0.155270    0.042190    0.289158    11.00000   -1.50000
H10B  2    0.000028    0.041508    0.352252    11.00000   -1.50000
H10C  2    0.147843    0.028730    0.420026    11.00000   -1.50000
AFIX   0
N11   3    0.445504    0.304200    0.222765    11.00000    0.04201    0.06300 =
         0.05088   -0.02205   -0.00374   -0.01142
C12   1    0.570962    0.339240    0.143371    11.00000    0.04995    0.08289 =
         0.06571   -0.03339    0.00445   -0.02124
AFIX  23
H12A  2    0.602605    0.415393    0.138967    11.00000   -1.20000
H12B  2    0.540714    0.358407    0.062727    11.00000   -1.20000
AFIX   0
C13   1    0.698658    0.236386    0.185371    11.00000    0.05062    0.13453 =
         0.11723   -0.05159    0.00809   -0.00028
AFIX 137
H13A  2    0.724674    0.213415    0.267124    11.00000   -1.50000
H13B  2    0.783193    0.265516    0.134146    11.00000   -1.50000
H13C  2    0.670782    0.163633    0.182035    11.00000   -1.50000
AFIX   0
C20   1    0.271214    0.387634    0.441902    11.00000    0.05850    0.04738 =
         0.06667   -0.03566   -0.00636    0.00088
C21   1    0.415712    0.417666    0.407407    11.00000    0.06948    0.04657 =
         0.07743   -0.03722    0.00724   -0.01194
C22   1    0.518303    0.319241    0.489027    11.00000    0.05302    0.06502 =
         0.08760   -0.05369   -0.00111   -0.01000
C23   1    0.432929    0.228567    0.578212    11.00000    0.06244    0.05777 =
         0.05721   -0.03779   -0.01328    0.00077
C24   1    0.277796    0.268586    0.547200    11.00000    0.05719    0.05286 =
         0.05701   -0.03559   -0.00149   -0.00509
C25   1    0.130663    0.466332    0.376627    11.00000    0.07564    0.06590 =
         0.09621   -0.04460   -0.01965    0.01719
AFIX 137
H25A  2    0.053081    0.412737    0.394050    11.00000   -1.50000
H25B  2    0.148334    0.507534    0.291124    11.00000   -1.50000
H25C  2    0.100164    0.529348    0.402717    11.00000   -1.50000
AFIX   0
C26   1    0.456306    0.533684    0.299262    11.00000    0.12192    0.05492 =
         0.11422   -0.03970    0.03075   -0.02892
AFIX 137
H26A  2    0.377371    0.565805    0.239780    11.00000   -1.50000
H26B  2    0.547571    0.512732    0.265772    11.00000   -1.50000
H26C  2    0.470135    0.597275    0.322546    11.00000   -1.50000
AFIX   0
C27   1    0.683966    0.322626    0.492396    11.00000    0.05649    0.12780 =
         0.15272   -0.10357   -0.00223   -0.02034
AFIX 137
H27A  2    0.702892    0.374313    0.528679    11.00000   -1.50000
H27B  2    0.721940    0.357872    0.411477    11.00000   -1.50000
H27C  2    0.733027    0.237860    0.539185    11.00000   -1.50000
AFIX   0
C28   1    0.493639    0.114098    0.690005    11.00000    0.09806    0.08523 =
         0.06195   -0.04298   -0.02820    0.01692
AFIX 137
H28A  2    0.588078    0.078614    0.672726    11.00000   -1.50000
H28B  2    0.424402    0.052103    0.717534    11.00000   -1.50000
H28C  2    0.507546    0.137834    0.751771    11.00000   -1.50000
AFIX   0
C29   1    0.148055    0.210613    0.622063    11.00000    0.07896    0.08408 =
         0.07754   -0.05060    0.01814   -0.02293
AFIX 137
H29A  2    0.116659    0.251444    0.670968    11.00000   -1.50000
H29B  2    0.177064    0.121605    0.673399    11.00000   -1.50000
H29C  2    0.066770    0.221403    0.570102    11.00000   -1.50000
AFIX   0
HKLF 4

REM  as in P-1
REM R1 =  0.0287 for    4917 Fo > 4sig(Fo)  and  0.0351 for all    5607 data
REM    233 parameters refined using      0 restraints

END

WGHT      0.0419      0.5019

REM Highest difference peak  1.257,  deepest hole -0.342,  1-sigma level  0.050
Q1    1   0.4345  0.1400  0.4348  11.00000  0.05    1.26
Q2    1   0.3579  0.1773 -0.0464  11.00000  0.05    0.33
Q3    1   0.4163  0.2917  0.3217  11.00000  0.05    0.33
Q4    1   0.4807  0.2588  0.3671  11.00000  0.05    0.33
Q5    1   0.4255  0.2322  0.4706  11.00000  0.05    0.31
Q6    1   0.2990  0.1926  0.4355  11.00000  0.05    0.29
Q7    1   0.2752  0.2789 -0.1384  11.00000  0.05    0.26
Q8    1   0.2934  0.3030  0.1310  11.00000  0.05    0.26
Q9    1   0.1822  0.3618 -0.0962  11.00000  0.05    0.26
Q10   1   0.4686  0.1673  0.6225  11.00000  0.05    0.25
Q11   1   0.5149  0.0577  0.4684  11.00000  0.05    0.25
Q12   1   0.3299  0.2180  0.5103  11.00000  0.05    0.25
Q13   1   0.4507  0.0412  0.4960  11.00000  0.05    0.24
Q14   1   0.3668  0.3183  0.3955  11.00000  0.05    0.23
Q15   1   0.2035  0.3433  0.0048  11.00000  0.05    0.22
Q16   1   0.4627  0.3788  0.4759  11.00000  0.05    0.22
Q17   1   0.2284  0.2217 -0.0549  11.00000  0.05    0.22
Q18   1   0.1876  0.3725 -0.1798  11.00000  0.05    0.21
Q19   1   0.4806  0.2744  0.5526  11.00000  0.05    0.21
Q20   1   0.3472  0.2381  0.5824  11.00000  0.05    0.21
;
_shelx_res_checksum   83336

_shelx_hkl_file
;
   2   0   0    0.58    0.09
   2   0   0    0.62    0.10
   2   0   0    0.74    0.09
   3   0   0    9.53    0.29
   3   0   0    9.34    0.28
   3   0   0    9.43    0.31
   4   0   0   38.21    0.89
   4   0   0   37.02    0.90
   4   0   0   38.62    0.94
   5   0   0   13.41    0.43
   5   0   0   13.93    0.46
   5   0   0   13.66    0.41
  -6   0   0   43.20    0.97
  -6   0   0   44.57    0.98
   6   0   0   44.63    1.14
   6   0   0   44.03    1.08
   6   0   0   44.83    1.10
  -7   0   0   21.51    0.72
  -7   0   0   22.24    0.53
  -7   0   0   20.38    0.52
   7   0   0   22.36    0.67
   7   0   0   21.85    0.62
  -8   0   0   -0.09    0.11
  -8   0   0   -0.26    0.27
  -8   0   0   -0.11    0.11
   8   0   0   -0.13    0.19
   8   0   0    0.07    0.21
  -9   0   0    7.53    0.29
  -9   0   0    8.66    0.50
  -9   0   0    7.47    0.29
   9   0   0    7.49    0.45
   9   0   0    7.57    0.38
 -10   0   0   11.31    0.59
 -10   0   0   10.13    0.37
  10   0   0   10.22    0.52
 -11   0   0    2.55    0.23
 -11   0   0    3.16    0.46
  11   0   0    3.44    0.41
 -12   0   0    0.13    0.17
 -12   0   0    0.34    0.36
  12   0   0   -0.10    0.29
 -13   0   0   -0.41    0.37
 -13   0   0    0.18    0.18
  13   0   0    0.34    0.31
  13  -1   0    1.79    0.40
 -13   1   0    0.72    0.23
 -13   1   0    1.32    0.44
  12  -1   0    1.12    0.35
 -12   1   0    0.94    0.22
 -12   1   0    2.07    0.44
  11  -1   0    0.33    0.31
 -11   1   0    0.53    0.20
 -11   1   0    0.66    0.36
  10  -1   0    0.06    0.26
 -10   1   0    0.33    0.32
 -10   1   0    0.10    0.16
   9  -1   0    5.64    0.41
  -9   1   0    6.70    0.30
  -9   1   0    6.60    0.46
   8  -1   0   29.19    0.79
   8  -1   0   27.39    0.86
  -8   1   0   28.21    0.90
  -8   1   0   28.37    0.73
  -8   1   0   29.15    0.74
   7  -1   0   59.40    1.39
   7  -1   0   58.96    1.44
  -7   1   0   56.51    1.50
  -7   1   0   58.85    1.34
  -7   1   0   58.48    1.34
   6  -1   0    7.13    0.29
   6  -1   0    6.50    0.34
  -6   1   0    6.99    0.25
  -6   1   0    6.82    0.24
  -6   1   0    6.18    0.37
   5  -1   0    6.02    0.26
   5  -1   0    6.22    0.30
  -5   1   0    6.14    0.22
  -5   1   0    6.10    0.32
  -5   1   0    6.45    0.22
   4  -1   0   57.16    1.30
   4  -1   0   57.29    1.31
  -4   1   0   58.25    1.27
  -4   1   0   57.47    1.37
  -4   1   0   57.56    1.27
   3  -1   0  249.94    5.42
   3  -1   0  251.96    5.24
  -3   1   0  255.44    5.38
  -3   1   0  252.82    5.50
  -3   1   0  254.85    5.39
   2  -1   0   28.45    0.66
   2  -1   0   28.47    0.65
  -2   1   0   28.95    0.65
  -2   1   0   29.07    0.69
  -2   1   0   28.64    0.65
   1  -1   0  927.37   19.63
   1  -1   0  933.95   18.90
  -1   1   0  916.10   19.58
  -1   1   0  920.82   19.59
  -1   1   0  894.80   19.82
  -1  -1   0  680.22   14.22
   1   1   0  647.84   14.53
   1   1   0  681.58   13.72
   1   1   0  671.68   14.44
   2   1   0  369.14    7.85
   2   1   0  369.14    7.59
   2   1   0  356.71    7.99
   3   1   0  111.76    2.46
   3   1   0  111.77    2.36
   3   1   0  113.07    2.49
   4   1   0   49.07    1.12
   4   1   0   50.14    1.17
   4   1   0   50.13    1.19
   5   1   0    3.83    0.26
   5   1   0    4.30    0.25
   5   1   0    4.10    0.24
   6   1   0   17.65    0.57
   6   1   0   17.96    0.55
   6   1   0   17.92    0.54
   7   1   0   20.86    0.67
   7   1   0   20.92    0.63
   7   1   0   20.55    0.62
  -8  -1   0   12.02    0.31
  -8  -1   0   12.05    0.31
   8   1   0   12.59    0.53
   8   1   0   12.51    0.49
   8   1   0   12.14    0.47
  -9  -1   0    2.88    0.40
  -9  -1   0    2.88    0.16
  -9  -1   0    2.78    0.17
   9   1   0    2.91    0.33
   9   1   0    3.39    0.32
 -10  -1   0    1.30    0.37
 -10  -1   0    1.26    0.15
 -10  -1   0    1.09    0.15
  10   1   0    1.20    0.28
  10   1   0    1.66    0.28
 -11  -1   0    1.64    0.18
 -11  -1   0    2.45    0.45
  11   1   0    2.03    0.36
 -12  -1   0    2.84    0.47
 -12  -1   0    1.94    0.20
  12   1   0    1.94    0.36
 -13  -1   0    0.40    0.17
 -13  -1   0   -0.27    0.38
  13   1   0    0.60    0.32
  13  -2   0   -0.25    0.30
 -13   2   0    0.05    0.37
 -13   2   0    0.21    0.22
  12  -2   0    1.07    0.35
 -12   2   0    2.00    0.43
 -12   2   0    1.53    0.26
  11  -2   0    3.78    0.45
 -11   2   0    4.51    0.32
 -11   2   0    5.02    0.51
  10  -2   0    7.78    0.49
 -10   2   0    7.38    0.37
 -10   2   0    8.80    0.55
   9  -2   0    3.13    0.38
  -9   2   0    3.34    0.40
  -9   2   0    3.14    0.26
   8  -2   0    0.13    0.23
   8  -2   0   -0.20    0.18
  -8   2   0    0.08    0.15
  -8   2   0   -0.35    0.25
   7  -2   0   14.80    0.47
   7  -2   0   14.75    0.55
  -7   2   0   16.12    0.48
  -7   2   0   15.27    0.47
  -7   2   0   14.70    0.58
   6  -2   0   59.14    1.43
   6  -2   0   59.45    1.37
  -6   2   0   58.94    1.48
  -6   2   0   59.30    1.38
  -6   2   0   59.01    1.37
   5  -2   0   30.96    0.80
   5  -2   0   29.47    0.73
  -5   2   0   29.89    0.83
  -5   2   0   29.10    0.73
  -5   2   0   29.69    0.75
   4  -2   0    6.69    0.24
   4  -2   0    6.21    0.29
  -4   2   0    6.50    0.24
  -4   2   0    6.52    0.31
  -4   2   0    6.62    0.25
   3  -2   0    0.20    0.11
   3  -2   0    0.37    0.10
  -3   2   0    0.36    0.10
  -3   2   0    0.26    0.09
  -3   2   0    0.33    0.14
   2  -2   0    2.42    0.15
   2  -2   0    2.63    0.14
  -2   2   0    2.73    0.18
  -2   2   0    2.83    0.15
   1  -2   0  231.59    4.86
   1  -2   0  228.82    4.87
   1  -2   0  230.31    4.67
  -1   2   0  223.08    4.91
  -1   2   0  223.06    4.85
   0  -2   0  888.85   19.14
   0  -2   0  875.18   18.24
   0  -2   0  904.67   19.11
   0   2   0  889.19   19.36
   0   2   0  897.12   19.08
  -1  -2   0  582.31   12.54
  -1  -2   0  567.40   12.62
  -1  -2   0  588.87   11.94
  -1  -2   0  603.28   12.59
   1   2   0  588.44   12.73
  -2  -2   0  377.46    8.06
  -2  -2   0  381.66    8.12
   2   2   0  389.73    7.82
   2   2   0  379.81    8.14
   2   2   0  370.36    8.17
   3   2   0  528.14   11.76
   3   2   0  551.39   11.60
   3   2   0  547.52   11.24
   4   2   0   30.64    0.80
   4   2   0   31.58    0.81
   4   2   0   31.67    0.74
   5   2   0   45.84    1.12
   5   2   0   45.31    1.05
   5   2   0   44.89    1.13
   6   2   0   32.08    0.89
   6   2   0   32.91    0.88
   6   2   0   32.78    0.83
   7   2   0    0.32    0.18
   7   2   0    0.31    0.20
   7   2   0    0.04    0.21
   8   2   0    0.17    0.21
   8   2   0   -0.28    0.23
   8   2   0   -0.20    0.22
   9   2   0   10.80    0.52
   9   2   0   11.11    0.48
   9   2   0    9.59    0.47
 -10  -2   0    8.74    0.28
 -10  -2   0    8.97    0.28
  10   2   0    9.29    0.47
  10   2   0   10.61    0.53
  10   2   0    9.12    0.48
 -11  -2   0    1.49    0.15
 -11  -2   0    1.36    0.39
  11   2   0    1.68    0.33
 -12  -2   0    0.17    0.14
 -12  -2   0    0.13    0.38
  12   2   0    0.42    0.30
 -13  -2   0    1.55    0.18
 -13  -2   0    2.19    0.50
  13   2   0    1.83    0.39
 -14  -2   0    0.51    0.15
  13  -3   0    0.81    0.36
 -13   3   0    0.94    0.26
 -13   3   0    0.81    0.40
  12  -3   0    0.26    0.32
 -12   3   0    0.65    0.25
 -12   3   0    0.98    0.39
  11  -3   0    0.33    0.29
 -11   3   0   -0.19    0.33
 -11   3   0    0.17    0.21
  10  -3   0    3.25    0.42
 -10   3   0    3.03    0.30
 -10   3   0    3.74    0.44
   9  -3   0   11.19    0.56
  -9   3   0   11.03    0.46
  -9   3   0   12.25    0.58
   8  -3   0   20.82    0.74
  -8   3   0   22.11    0.77
  -8   3   0   22.09    0.66
   7  -3   0   21.16    0.70
   7  -3   0   21.14    0.58
  -7   3   0   19.84    0.71
  -7   3   0   20.54    0.61
   6  -3   0    0.71    0.16
   6  -3   0    1.02    0.22
  -6   3   0    0.91    0.17
  -6   3   0    0.98    0.25
  -6   3   0    0.79    0.16
   5  -3   0   38.48    0.91
   5  -3   0   37.65    0.97
  -5   3   0   39.08    0.95
  -5   3   0   37.46    0.94
  -5   3   0   36.83    1.00
   4  -3   0  127.93    2.76
   4  -3   0  128.93    2.79
  -4   3   0  124.76    2.88
  -4   3   0  127.32    2.81
  -4   3   0  130.01    2.83
   3  -3   0   58.97    1.35
   3  -3   0   60.86    1.34
  -3   3   0   58.64    1.36
  -3   3   0   59.61    1.41
   2  -3   0  138.66    2.90
   2  -3   0  135.67    2.99
   2  -3   0  141.53    3.00
  -2   3   0  135.78    2.99
  -2   3   0  136.41    3.04
   1  -3   0   86.22    1.92
   1  -3   0   92.06    2.01
   1  -3   0   95.97    2.03
  -1   3   0   92.10    2.05
  -1   3   0   90.49    2.01
   0  -3   0   16.97    0.46
   0  -3   0   17.96    0.41
   0  -3   0   17.48    0.47
   0   3   0   17.11    0.47
   0   3   0   17.68    0.45
  -1  -3   0  142.27    3.13
  -1  -3   0  143.86    2.92
  -1  -3   0  140.70    3.10
   1   3   0  143.24    3.15
   1   3   0  145.38    3.08
  -2  -3   0  368.42    7.50
  -2  -3   0  372.80    7.77
  -2  -3   0  359.05    7.86
  -2  -3   0  363.32    7.83
   2   3   0  361.96    7.89
  -3  -3   0   64.17    1.40
  -3  -3   0   63.36    1.40
   3   3   0   63.05    1.49
   3   3   0   64.16    1.49
   3   3   0   65.14    1.35
  -4  -3   0   53.96    1.16
  -4  -3   0   53.04    1.15
   4   3   0   51.51    1.28
   4   3   0   54.03    1.29
   4   3   0   52.57    1.16
   5   3   0    9.11    0.39
   5   3   0    8.25    0.38
   5   3   0    8.78    0.31
   6   3   0   48.18    1.23
   6   3   0   49.15    1.25
   6   3   0   48.35    1.14
   7   3   0   24.62    0.75
   7   3   0   25.07    0.78
   7   3   0   25.33    0.69
   8   3   0    2.37    0.32
   8   3   0    2.63    0.28
   8   3   0    2.27    0.33
   9   3   0   -0.12    0.25
   9   3   0   -0.11    0.20
   9   3   0   -0.32    0.25
 -10  -3   0    1.46    0.34
 -10  -3   0    1.15    0.11
  10   3   0    1.09    0.32
  10   3   0    1.25    0.28
 -11  -3   0    3.15    0.17
 -11  -3   0    3.10    0.18
 -11  -3   0    4.18    0.47
  11   3   0    3.60    0.42
  11   3   0    3.24    0.39
 -12  -3   0    2.91    0.19
 -12  -3   0    3.58    0.50
  12   3   0    3.37    0.43
 -13  -3   0   -0.19    0.39
 -13  -3   0    0.22    0.13
  13   3   0    0.58    0.33
 -13   4   0   -0.02    0.21
  12  -4   0    0.79    0.35
 -12   4   0    0.92    0.27
 -12   4   0    1.17    0.42
  11  -4   0    4.28    0.48
 -11   4   0    2.78    0.33
 -11   4   0    3.10    0.45
  10  -4   0    2.35    0.37
 -10   4   0    2.69    0.31
 -10   4   0    1.87    0.41
   9  -4   0   -0.42    0.23
  -9   4   0   -0.22    0.28
  -9   4   0    0.11    0.20
   8  -4   0    4.51    0.38
  -8   4   0    5.15    0.41
  -8   4   0    4.34    0.31
   7  -4   0   28.74    0.87
  -7   4   0   27.80    0.89
  -7   4   0   28.78    0.81
   6  -4   0   49.67    1.28
   6  -4   0   51.49    1.19
  -6   4   0   50.88    1.34
  -6   4   0   50.61    1.26
   5  -4   0   39.19    1.02
   5  -4   0   40.38    0.96
  -5   4   0   39.76    1.07
  -5   4   0   41.06    1.03
  -5   4   0   38.57    1.00
   4  -4   0    1.09    0.16
   4  -4   0    1.23    0.19
  -4   4   0    0.94    0.17
  -4   4   0    0.61    0.21
   3  -4   0   20.78    0.58
   3  -4   0   20.70    0.55
  -3   4   0   21.06    0.62
  -3   4   0   21.13    0.58
   2  -4   0   27.12    0.69
   2  -4   0   28.03    0.70
   2  -4   0   28.32    0.72
  -2   4   0   27.36    0.71
  -2   4   0   28.04    0.74
   1  -4   0  151.32    3.32
   1  -4   0  146.34    3.17
   1  -4   0  159.17    3.34
  -1   4   0  152.16    3.32
  -1   4   0  151.54    3.37
   0  -4   0  233.36    5.19
   0  -4   0  238.78    5.20
   0  -4   0  250.23    4.93
   0   4   0  238.78    5.17
  -1  -4   0    1.55    0.18
  -1  -4   0    1.37    0.08
  -1  -4   0    1.73    0.16
   1   4   0    1.62    0.19
   1   4   0    1.51    0.13
  -2  -4   0   19.91    0.53
  -2  -4   0   18.90    0.56
  -2  -4   0   20.25    0.42
   2   4   0   20.76    0.57
  -3  -4   0  265.40    5.69
  -3  -4   0  270.29    5.68
  -3  -4   0  258.97    5.79
  -3  -4   0  270.30    5.44
   3   4   0  262.97    5.81
  -4  -4   0   92.78    2.02
  -4  -4   0   92.35    2.01
  -4  -4   0   88.70    2.13
   4   4   0   91.47    1.94
   4   4   0   91.32    2.13
   4   4   0   94.05    2.13
  -5  -4   0    1.58    0.13
  -5  -4   0    1.53    0.14
   5   4   0    1.76    0.16
   5   4   0    1.31    0.23
   5   4   0    1.73    0.25
  -6  -4   0    0.09    0.09
   6   4   0    0.00    0.13
   6   4   0   -0.02    0.20
  -7  -4   0    5.80    0.18
  -7  -4   0    5.79    0.19
   7   4   0    5.22    0.41
   7   4   0    5.03    0.37
   7   4   0    5.42    0.28
  -8  -4   0   21.72    0.50
  -8  -4   0   22.01    0.76
  -8  -4   0   20.88    0.51
   8   4   0   20.31    0.63
   8   4   0   21.46    0.74
   8   4   0   20.31    0.72
  -9  -4   0   10.71    0.29
  -9  -4   0   10.59    0.30
  -9  -4   0   11.50    0.56
   9   4   0   10.50    0.46
   9   4   0   10.58    0.54
 -10  -4   0    5.07    0.20
 -10  -4   0    5.59    0.48
 -10  -4   0    5.15    0.19
  10   4   0    5.23    0.37
  10   4   0    5.26    0.42
 -11  -4   0    0.83    0.14
 -11  -4   0    0.56    0.36
  11   4   0    0.94    0.33
  11   4   0    1.05    0.29
 -12  -4   0    1.37    0.16
  12   4   0    1.63    0.39
 -13  -4   0    3.32    0.53
 -13  -4   0    2.54    0.18
  12  -5   0    0.52    0.33
 -12   5   0   -0.18    0.23
 -12   5   0    0.25    0.40
  11  -5   0    0.20    0.30
 -11   5   0   -0.32    0.33
 -11   5   0   -0.19    0.22
  10  -5   0    4.66    0.49
 -10   5   0    3.97    0.36
 -10   5   0    5.94    0.51
   9  -5   0    9.34    0.53
  -9   5   0    7.99    0.44
  -9   5   0    8.93    0.53
   8  -5   0    6.00    0.43
  -8   5   0    5.84    0.44
  -8   5   0    5.74    0.37
   7  -5   0    3.26    0.36
  -7   5   0    2.11    0.34
  -7   5   0    1.92    0.27
   6  -5   0   10.63    0.49
   6  -5   0   11.90    0.39
  -6   5   0   10.74    0.51
  -6   5   0   11.55    0.47
   5  -5   0   63.31    1.44
   5  -5   0   59.86    1.49
  -5   5   0   62.78    1.56
  -5   5   0   61.44    1.50
   4  -5   0  117.97    2.61
   4  -5   0  117.14    2.59
  -4   5   0  117.15    2.66
  -4   5   0  117.79    2.72
   3  -5   0  102.93    2.35
   3  -5   0  110.57    2.39
   3  -5   0  104.46    2.30
  -3   5   0  103.72    2.43
  -3   5   0  104.10    2.38
   2  -5   0   23.38    0.65
   2  -5   0   23.17    0.60
   2  -5   0   21.82    0.60
  -2   5   0   21.94    0.65
  -2   5   0   22.39    0.62
   1  -5   0   48.36    1.15
   1  -5   0   44.67    1.05
   1  -5   0   46.92    1.12
  -1   5   0   46.68    1.16
  -1   5   0   46.62    1.12
   0  -5   0   64.94    1.48
   0  -5   0   61.12    1.46
   0  -5   0   61.93    1.35
   0   5   0   61.35    1.44
   0   5   0   64.15    1.50
  -1  -5   0  178.82    3.90
  -1  -5   0  179.26    3.65
  -1  -5   0  175.06    3.92
   1   5   0  178.81    3.87
  -2  -5   0   40.46    1.00
  -2  -5   0   40.26    1.04
   2   5   0   41.29    1.04
  -3  -5   0   15.82    0.48
  -3  -5   0   16.26    0.56
  -3  -5   0   16.88    0.36
  -3  -5   0   17.89    0.47
   3   5   0   16.74    0.55
  -4  -5   0   29.03    0.72
  -4  -5   0   28.35    0.73
  -4  -5   0   27.96    0.83
  -4  -5   0   29.16    0.64
   4   5   0   29.51    0.83
  -5  -5   0   64.15    1.50
  -5  -5   0   64.67    1.64
  -5  -5   0   67.44    1.42
  -5  -5   0   65.98    1.49
   5   5   0   66.62    1.62
  -6  -5   0   24.98    0.64
  -6  -5   0   23.74    0.79
  -6  -5   0   24.62    0.62
   6   5   0   25.09    0.63
   6   5   0   25.20    0.78
  -7  -5   0   13.93    0.41
  -7  -5   0   14.72    0.61
  -7  -5   0   14.90    0.41
   7   5   0   14.19    0.46
   7   5   0   14.33    0.59
  -8  -5   0    0.41    0.32
  -8  -5   0    0.12    0.12
  -8  -5   0    0.22    0.12
   8   5   0    0.03    0.19
   8   5   0    0.40    0.27
  -9  -5   0    2.61    0.41
  -9  -5   0    2.64    0.19
  -9  -5   0    3.05    0.19
   9   5   0    2.72    0.38
   9   5   0    3.21    0.30
 -10  -5   0    3.16    0.43
 -10  -5   0    2.75    0.19
  10   5   0    3.18    0.41
  10   5   0    3.14    0.33
 -11  -5   0    2.89    0.20
 -11  -5   0    4.32    0.48
  11   5   0    3.80    0.45
 -12  -5   0    3.72    0.50
 -12  -5   0    2.80    0.21
  12   5   0    3.67    0.47
 -13  -5   0    0.12    0.14
  13   5   0    0.43    0.37
  12  -6   0    1.20    0.40
 -12   6   0    1.58    0.32
 -12   6   0    1.65    0.47
  11  -6   0    1.88    0.40
 -11   6   0    2.16    0.45
 -11   6   0    1.75    0.32
  10  -6   0    3.06    0.45
 -10   6   0    2.62    0.44
 -10   6   0    2.26    0.34
   9  -6   0    0.19    0.27
  -9   6   0   -0.30    0.30
  -9   6   0    0.04    0.23
   8  -6   0    2.50    0.36
  -8   6   0    4.00    0.43
  -8   6   0    2.63    0.32
   7  -6   0   15.88    0.64
  -7   6   0   15.21    0.60
  -7   6   0   16.26    0.64
   6  -6   0   29.13    0.88
  -6   6   0   28.48    0.91
  -6   6   0   28.65    0.86
   5  -6   0    4.04    0.26
   5  -6   0    3.64    0.33
  -5   6   0    3.75    0.31
  -5   6   0    3.89    0.37
   4  -6   0    4.89    0.29
   4  -6   0    4.37    0.26
  -4   6   0    4.39    0.32
  -4   6   0    4.12    0.28
   3  -6   0   45.39    1.14
   3  -6   0   49.52    1.19
   3  -6   0   46.66    1.14
  -3   6   0   45.86    1.22
  -3   6   0   46.18    1.18
   2  -6   0   38.69    1.01
   2  -6   0   37.40    0.96
   2  -6   0   39.97    0.94
  -2   6   0   36.70    0.98
  -2   6   0   38.53    1.03
   1  -6   0   71.41    1.65
   1  -6   0   68.76    1.61
   1  -6   0   68.19    1.51
  -1   6   0   66.40    1.66
  -1   6   0   68.57    1.62
   0  -6   0   72.50    1.56
   0  -6   0   71.38    1.70
   0  -6   0   73.79    1.73
   0   6   0   72.91    1.68
   0   6   0   72.41    1.75
  -1  -6   0    9.86    0.39
  -1  -6   0    9.37    0.40
  -1  -6   0    9.52    0.26
   1   6   0   10.39    0.35
   1   6   0    9.94    0.41
  -2  -6   0   64.59    1.34
  -2  -6   0   66.63    1.55
  -2  -6   0   64.92    1.58
   2   6   0   65.02    1.60
  -3  -6   0  110.34    2.59
  -3  -6   0  111.23    2.52
   3   6   0  113.66    2.61
  -4  -6   0   53.91    1.16
  -4  -6   0   58.85    1.33
  -4  -6   0   55.01    1.44
  -4  -6   0   55.60    1.34
   4   6   0   57.60    1.44
  -5  -6   0    6.55    0.28
  -5  -6   0    6.36    0.29
  -5  -6   0    6.95    0.42
  -5  -6   0    6.57    0.21
   5   6   0    6.85    0.39
  -6  -6   0    1.39    0.16
  -6  -6   0    1.04    0.16
  -6  -6   0    0.67    0.29
  -6  -6   0    0.86    0.16
   6   6   0    1.21    0.27
  -7  -6   0   12.24    0.59
  -7  -6   0   12.59    0.40
  -7  -6   0   12.28    0.40
  -7  -6   0   11.72    0.41
   7   6   0   13.50    0.58
  -8  -6   0   10.68    0.59
  -8  -6   0    9.75    0.36
   8   6   0    9.99    0.53
  -9  -6   0    6.28    0.28
  -9  -6   0    6.09    0.49
   9   6   0    6.74    0.44
 -10  -6   0    0.39    0.36
 -10  -6   0    0.12    0.14
  10   6   0    0.18    0.30
 -11  -6   0    0.13    0.15
 -11  -6   0   -0.45    0.35
  11   6   0    0.10    0.31
 -12  -6   0    1.66    0.20
 -12  -6   0    2.10    0.46
  12   6   0    1.34    0.39
 -13  -6   0    1.94    0.21
  13   6   0    2.32    0.44
  11  -7   0    0.36    0.33
 -11   7   0    0.37    0.38
 -11   7   0    0.63    0.30
  10  -7   0    2.97    0.45
 -10   7   0    2.77    0.46
 -10   7   0    2.46    0.37
   9  -7   0    4.75    0.50
  -9   7   0    3.88    0.41
  -9   7   0    6.06    0.51
   8  -7   0    3.23    0.41
  -8   7   0    2.79    0.42
  -8   7   0    2.92    0.35
   7  -7   0   -0.05    0.23
  -7   7   0    0.14    0.22
  -7   7   0   -0.65    0.24
   6  -7   0    5.70    0.39
  -6   7   0    6.48    0.46
  -6   7   0    5.48    0.39
   5  -7   0   29.54    0.89
   5  -7   0   32.25    0.84
  -5   7   0   30.75    0.96
  -5   7   0   31.19    0.93
   4  -7   0   43.00    1.12
   4  -7   0   43.72    1.11
  -4   7   0   45.48    1.23
  -4   7   0   42.66    1.16
   3  -7   0    4.45    0.28
   3  -7   0    4.56    0.30
   3  -7   0    4.52    0.27
  -3   7   0    4.51    0.30
  -3   7   0    4.12    0.32
   2  -7   0   -0.06    0.17
   2  -7   0   -0.15    0.14
   2  -7   0    0.17    0.18
  -2   7   0   -0.12    0.16
  -2   7   0    0.12    0.22
   1  -7   0    7.53    0.39
   1  -7   0    6.94    0.34
   1  -7   0    7.34    0.29
  -1   7   0    7.37    0.34
  -1   7   0    7.14    0.40
   0  -7   0   69.11    1.76
   0  -7   0   73.43    1.75
   0  -7   0   74.48    1.59
   0   7   0   76.04    1.74
   0   7   0   73.41    1.80
  -1  -7   0   73.35    1.76
  -1  -7   0   74.95    1.55
  -1  -7   0   68.24    1.75
   1   7   0   74.88    1.81
   1   7   0   74.41    1.71
  -2  -7   0   55.46    1.12
  -2  -7   0   53.22    1.38
  -2  -7   0   55.97    1.36
   2   7   0   52.47    1.40
  -3  -7   0    0.08    0.16
  -3  -7   0   -0.19    0.22
   3   7   0    0.46    0.22
  -4  -7   0   22.30    0.75
  -4  -7   0   23.90    0.66
  -4  -7   0   22.15    0.67
   4   7   0   23.16    0.74
  -5  -7   0   14.31    0.49
  -5  -7   0   13.51    0.60
   5   7   0   14.09    0.56
  -6  -7   0   25.89    0.74
  -6  -7   0   27.21    0.90
   6   7   0   25.88    0.85
  -7  -7   0    0.98    0.34
  -7  -7   0    0.83    0.19
   7   7   0    0.92    0.31
  -8  -7   0    0.11    0.16
  -8  -7   0    0.39    0.33
   8   7   0    0.09    0.28
  -9  -7   0    2.57    0.24
  -9  -7   0    1.80    0.39
   9   7   0    1.61    0.36
 -10  -7   0    4.31    0.51
 -10  -7   0    3.38    0.26
  10   7   0    4.02    0.46
 -11  -7   0    2.47    0.47
 -11  -7   0    1.77    0.22
  11   7   0    1.66    0.39
 -12  -7   0    0.89    0.20
 -12  -7   0    1.34    0.45
  12   7   0    0.37    0.36
 -13  -7   0   -0.15    0.17
  13   7   0    0.01    0.37
  11  -8   0    0.65    0.36
 -11   8   0    0.74    0.43
 -11   8   0    0.83    0.34
  10  -8   0   -0.12    0.32
 -10   8   0    0.07    0.37
 -10   8   0   -0.05    0.27
   9  -8   0    0.15    0.31
  -9   8   0    0.49    0.37
  -9   8   0    0.59    0.29
   8  -8   0    3.20    0.42
  -8   8   0    3.45    0.46
  -8   8   0    3.20    0.39
   7  -8   0   10.40    0.56
  -7   8   0   11.23    0.57
  -7   8   0   11.53    0.61
   6  -8   0    9.41    0.51
  -6   8   0   10.06    0.52
  -6   8   0   10.31    0.57
   5  -8   0    3.96    0.35
   5  -8   0    3.30    0.29
  -5   8   0    3.25    0.34
  -5   8   0    3.46    0.40
   4  -8   0   11.19    0.49
   4  -8   0   11.28    0.46
  -4   8   0   10.36    0.50
  -4   8   0   11.62    0.57
   3  -8   0   25.93    0.76
   3  -8   0   27.52    0.79
  -3   8   0   26.43    0.82
  -3   8   0   28.07    0.89
   2  -8   0    5.64    0.35
   2  -8   0    5.59    0.38
   2  -8   0    5.52    0.28
  -2   8   0    5.77    0.41
  -2   8   0    5.14    0.33
   1  -8   0    6.76    0.37
   1  -8   0    6.39    0.37
   1  -8   0    7.38    0.29
  -1   8   0    7.08    0.37
  -1   8   0    7.38    0.43
   0  -8   0    1.25    0.24
   0  -8   0    1.32    0.16
   0  -8   0    0.98    0.22
   0   8   0    1.20    0.21
   0   8   0    1.00    0.27
  -1  -8   0   11.89    0.32
  -1  -8   0   11.19    0.49
  -1  -8   0   11.51    0.48
   1   8   0   11.84    0.44
   1   8   0   11.63    0.51
  -2  -8   0   38.47    1.09
  -2  -8   0   40.48    1.09
   2   8   0   38.91    1.12
  -3  -8   0   63.60    1.63
  -3  -8   0   62.93    1.58
   3   8   0   64.13    1.65
  -4  -8   0    3.02    0.36
  -4  -8   0    3.05    0.29
   4   8   0    3.19    0.37
  -5  -8   0   -0.07    0.27
  -5  -8   0   -0.31    0.17
   5   8   0   -0.31    0.23
  -6  -8   0   10.10    0.44
  -6  -8   0    9.90    0.57
   6   8   0    9.92    0.54
  -7  -8   0   18.41    0.63
  -7  -8   0   20.32    0.80
   7   8   0   18.84    0.75
  -8  -8   0    7.12    0.39
  -8  -8   0    9.59    0.61
   8   8   0    8.58    0.53
  -9  -8   0    1.40    0.40
  -9  -8   0    1.90    0.24
   9   8   0    1.37    0.37
 -10  -8   0   -0.46    0.35
 -10  -8   0    0.01    0.18
  10   8   0    0.14    0.33
 -11  -8   0    0.34    0.20
 -11  -8   0    0.64    0.40
  11   8   0    0.44    0.35
 -12  -8   0    1.69    0.47
 -12  -8   0    1.48    0.24
  12   8   0    2.08    0.44
  10  -9   0    2.49    0.44
 -10   9   0    2.56    0.49
 -10   9   0    2.45    0.43
   9  -9   0    0.64    0.34
  -9   9   0   -0.05    0.37
  -9   9   0    0.54    0.32
   8  -9   0   -0.25    0.25
  -8   9   0    0.09    0.29
  -8   9   0   -0.09    0.35
   7  -9   0    0.84    0.30
  -7   9   0    0.81    0.31
  -7   9   0    0.50    0.32
   6  -9   0    6.38    0.46
  -6   9   0    7.28    0.53
  -6   9   0    6.18    0.47
   5  -9   0   15.69    0.63
  -5   9   0   15.38    0.71
  -5   9   0   15.89    0.67
   4  -9   0   15.73    0.58
   4  -9   0   16.07    0.59
  -4   9   0   16.72    0.66
  -4   9   0   17.03    0.71
   3  -9   0    0.34    0.20
   3  -9   0    0.30    0.22
  -3   9   0    0.46    0.28
  -3   9   0    0.11    0.21
   2  -9   0   14.93    0.56
   2  -9   0   14.63    0.50
   2  -9   0   14.91    0.60
  -2   9   0   15.35    0.66
  -2   9   0   13.73    0.57
   1  -9   0   32.88    0.97
   1  -9   0   30.35    0.79
   1  -9   0   32.05    0.92
  -1   9   0   29.20    0.97
  -1   9   0   31.55    0.92
   0  -9   0   38.03    1.12
   0  -9   0   39.26    0.92
   0  -9   0   39.64    1.10
   0   9   0   40.63    1.18
   0   9   0   39.07    1.07
  -1  -9   0   14.78    0.58
  -1  -9   0   14.93    0.39
  -1  -9   0   14.64    0.59
   1   9   0   14.11    0.61
  -2  -9   0    1.33    0.30
  -2  -9   0    1.67    0.27
   2   9   0    1.63    0.31
  -3  -9   0    9.46    0.53
  -3  -9   0   12.00    0.52
   3   9   0    9.65    0.55
  -4  -9   0   27.52    0.87
  -4  -9   0   31.14    0.97
   4   9   0   28.51    0.94
  -5  -9   0   27.46    0.95
  -5  -9   0   27.88    0.86
   5   9   0   26.13    0.91
  -6  -9   0    9.97    0.48
  -6  -9   0   11.35    0.62
   6   9   0   10.91    0.56
  -7  -9   0    0.44    0.22
  -7  -9   0    0.59    0.35
   7   9   0    0.56    0.32
  -8  -9   0    1.31    0.25
  -8  -9   0    1.30    0.39
   8   9   0    1.21    0.36
  -9  -9   0    5.21    0.55
  -9  -9   0    4.57    0.35
   9   9   0    4.47    0.48
 -10  -9   0    2.56    0.49
 -10  -9   0    1.63    0.26
  10   9   0    1.76    0.41
 -11  -9   0    1.92    0.28
 -11  -9   0    1.56    0.46
  11   9   0    2.07    0.44
 -12  -9   0    0.12    0.21
 -12  -9   0    0.01    0.44
  12   9   0    0.10    0.37
   9 -10   0    2.15    0.43
  -9  10   0    2.36    0.43
  -9  10   0    2.73    0.50
   8 -10   0    3.15    0.43
  -8  10   0    2.30    0.40
  -8  10   0    4.02    0.53
   7 -10   0    3.48    0.42
  -7  10   0    2.91    0.48
  -7  10   0    3.12    0.43
   6 -10   0    1.72    0.33
  -6  10   0    1.38    0.34
  -6  10   0    0.86    0.35
   5 -10   0   -0.12    0.24
  -5  10   0    0.12    0.33
  -5  10   0    0.32    0.27
   4 -10   0   12.68    0.53
   4 -10   0   12.88    0.55
  -4  10   0   13.87    0.61
  -4  10   0   12.61    0.66
   3 -10   0   30.89    0.91
   3 -10   0   28.36    0.84
  -3  10   0   29.37    0.94
  -3  10   0   28.57    1.00
   2 -10   0   17.70    0.64
   2 -10   0   17.13    0.56
  -2  10   0   16.21    0.72
  -2  10   0   16.89    0.67
   1 -10   0    2.00    0.31
   1 -10   0    1.81    0.22
   1 -10   0    1.49    0.29
  -1  10   0    1.98    0.37
  -1  10   0    1.47    0.26
   0 -10   0    2.38    0.34
   0 -10   0    2.83    0.35
   0  10   0    1.63    0.34
  -1 -10   0   13.24    0.59
  -1 -10   0   13.10    0.59
   1  10   0   14.88    0.67
  -2 -10   0   20.57    0.74
  -2 -10   0   21.11    0.77
   2  10   0   20.81    0.81
  -3 -10   0   14.31    0.64
  -3 -10   0   14.34    0.61
   3  10   0   14.48    0.68
  -4 -10   0    3.36    0.42
  -4 -10   0    3.26    0.34
   4  10   0    3.27    0.40
  -5 -10   0    0.91    0.26
  -5 -10   0    0.85    0.35
   5  10   0    0.59    0.32
  -6 -10   0    8.79    0.59
  -6 -10   0    8.36    0.47
   6  10   0    8.88    0.56
  -7 -10   0    9.56    0.63
  -7 -10   0    9.27    0.49
   7  10   0    9.41    0.58
  -8 -10   0    4.52    0.54
  -8 -10   0    4.65    0.36
   8  10   0    4.27    0.49
  -9 -10   0   -0.01    0.38
  -9 -10   0   -0.07    0.21
   9  10   0    0.20    0.34
 -10 -10   0    0.35    0.23
 -10 -10   0    0.46    0.43
  10  10   0    0.14    0.35
 -11 -10   0    0.78    0.45
 -11 -10   0    0.59    0.25
  11  10   0    0.90    0.40
 -12 -10   0    1.32    0.51
 -12 -10   0    0.84    0.26
  12  10   0    0.43    0.38
   9 -11   0    0.19    0.33
  -9  11   0    0.09    0.43
  -9  11   0    0.44    0.33
   8 -11   0    0.09    0.31
  -8  11   0   -0.11    0.39
  -8  11   0   -0.01    0.32
   7 -11   0    1.63    0.38
  -7  11   0    1.52    0.43
  -7  11   0    2.18    0.41
   6 -11   0    3.85    0.43
  -6  11   0    3.03    0.42
  -6  11   0    3.57    0.51
   5 -11   0    7.16    0.47
  -5  11   0    6.73    0.54
  -5  11   0    6.96    0.50
   4 -11   0    3.47    0.36
  -4  11   0    2.91    0.38
  -4  11   0    3.72    0.47
   3 -11   0    0.57    0.27
   3 -11   0    0.37    0.23
  -3  11   0    0.89    0.35
  -3  11   0    0.26    0.26
   2 -11   0   12.42    0.56
   2 -11   0   11.38    0.46
  -2  11   0   11.60    0.67
   1 -11   0   26.30    0.86
  -1  11   0   24.12    0.96
   0 -11   0   20.79    0.77
   0 -11   0   19.99    0.79
   0  11   0   19.59    0.84
  -1 -11   0    4.87    0.43
  -1 -11   0    5.31    0.43
   1  11   0    5.04    0.46
  -2 -11   0   -0.06    0.30
  -2 -11   0   -0.07    0.24
   2  11   0    0.16    0.30
  -3 -11   0    4.98    0.47
  -3 -11   0    5.46    0.41
   3  11   0    4.37    0.47
  -4 -11   0    7.24    0.47
  -4 -11   0    7.52    0.53
   4  11   0    6.70    0.52
  -5 -11   0    6.14    0.44
  -5 -11   0    5.93    0.52
   5  11   0    5.91    0.50
  -6 -11   0    2.54    0.45
  -6 -11   0    2.52    0.33
   6  11   0    1.71    0.37
  -7 -11   0    0.31    0.25
  -7 -11   0    0.42    0.37
   7  11   0    0.21    0.34
  -8 -11   0    3.29    0.38
  -8 -11   0    3.64    0.52
   8  11   0    2.77    0.46
  -9 -11   0    3.24    0.37
  -9 -11   0    3.00    0.53
   9  11   0    3.07    0.48
 -10 -11   0    0.94    0.27
 -10 -11   0    1.28    0.49
  10  11   0    1.16    0.40
 -11 -11   0    0.42    0.25
 -11 -11   0    0.07    0.43
  11  11   0   -0.03    0.36
   8 -12   0    1.56    0.40
  -8  12   0    1.57    0.50
  -8  12   0    1.53    0.42
   7 -12   0    0.77    0.34
  -7  12   0    0.59    0.34
  -7  12   0    0.34    0.41
   6 -12   0   -0.07    0.27
  -6  12   0   -0.01    0.31
  -6  12   0    0.18    0.36
   5 -12   0    1.00    0.32
  -5  12   0    1.06    0.41
  -5  12   0    0.75    0.33
   4 -12   0    6.37    0.44
  -4  12   0    6.53    0.59
  -3  12   0    9.24    0.61
   2 -12   0    3.62    0.39
  -2  12   0    2.80    0.47
   1 -12   0   -0.20    0.27
  -1  12   0    0.34    0.31
   0 -12   0    5.94    0.49
   0 -12   0    6.49    0.50
   0  12   0    4.90    0.52
  -1 -12   0   12.97    0.66
  -1 -12   0   12.80    0.65
   1  12   0   11.91    0.69
  -2 -12   0   12.89    0.65
  -2 -12   0   11.53    0.62
   2  12   0    9.99    0.61
  -3 -12   0    3.27    0.40
  -3 -12   0    3.49    0.44
   3  12   0    3.40    0.48
  -4 -12   0   -0.26    0.25
  -4 -12   0   -0.17    0.32
   4  12   0   -0.10    0.29
  -5 -12   0    0.25    0.27
  -5 -12   0    0.05    0.34
   5  12   0   -0.43    0.28
  -6 -12   0    2.47    0.46
  -6 -12   0    3.11    0.39
   6  12   0    2.03    0.40
  -7 -12   0    3.23    0.40
  -7 -12   0    4.12    0.53
   7  12   0    3.22    0.45
  -8 -12   0    0.89    0.45
  -8 -12   0    0.34    0.28
   8  12   0    0.30    0.33
  -9 -12   0   -0.03    0.25
  -9 -12   0    0.04    0.41
   9  12   0   -0.37    0.34
 -10 -12   0    0.37    0.26
 -10 -12   0   -0.12    0.43
  10  12   0    0.25    0.39
   7 -13   0    1.16    0.35
  -7  13   0    1.22    0.47
  -6  13   0    1.18    0.45
  -5  13   0    0.16    0.39
  -4  13   0    0.31    0.40
  -3  13   0    2.03    0.46
   2 -13   0    6.81    0.53
  -2  13   0    5.60    0.62
   1 -13   0    8.56    0.55
  -1  13   0    7.08    0.58
   0 -13   0    4.63    0.47
   0  13   0    3.74    0.52
  -1 -13   0   -0.16    0.30
  -1 -13   0    0.02    0.26
   1  13   0   -0.02    0.35
  -2 -13   0    1.93    0.41
  -2 -13   0    1.55    0.35
   2  13   0    1.50    0.40
  -3 -13   0    7.73    0.56
  -3 -13   0    8.77    0.58
   3  13   0    7.57    0.57
  -4 -13   0    3.59    0.43
  -4 -13   0    4.03    0.50
   4  13   0    3.93    0.49
  -5 -13   0    1.27    0.42
  -5 -13   0    0.64    0.29
   5  13   0    0.22    0.37
  -6 -13   0    0.35    0.39
  -6 -13   0   -0.01    0.27
   6  13   0    0.30    0.34
  -7 -13   0   -0.20    0.26
  -7 -13   0    0.75    0.41
   7  13   0    0.02    0.37
  -8 -13   0    1.34    0.34
  -8 -13   0    1.39    0.46
   8  13   0    0.68    0.37
  -9 -13   0    1.22    0.48
  -9 -13   0    1.56    0.34
   9  13   0    1.48    0.45
  -5  14   0    1.00    0.49
  -4  14   0    3.59    0.58
  -3  14   0    0.83    0.45
  -2  14   0    0.09    0.35
   1 -14   0    1.03    0.37
  -1  14   0    0.33    0.41
   0 -14   0    4.21    0.50
   0  14   0    3.61    0.54
  -1 -14   0    3.87    0.50
   1  14   0    3.61    0.54
  -2 -14   0    2.72    0.46
  -2 -14   0    3.03    0.45
   2  14   0    3.61    0.53
  -3 -14   0    0.03    0.31
  -3 -14   0   -0.14    0.38
   3  14   0   -0.13    0.37
  -4 -14   0    1.97    0.45
  -4 -14   0    1.36    0.38
   4  14   0    1.45    0.44
  -5 -14   0    2.60    0.43
  -5 -14   0    2.19    0.49
   5  14   0    1.74    0.43
  -6 -14   0    2.24    0.49
  -6 -14   0    1.64    0.38
   6  14   0    1.59    0.44
  -7 -14   0    0.68    0.33
  -7 -14   0    1.40    0.46
   7  14   0    1.10    0.44
  -8 -14   0    0.01    0.28
  -8 -14   0    0.03    0.43
   8  14   0    0.14    0.41
  -4  15   0    0.26    0.45
  -3  15   0    1.09    0.49
  -2  15   0    2.21    0.54
  -1  15   0    1.97    0.50
   0 -15   0    0.47    0.36
   0  15   0    0.45    0.41
  -1 -15   0    0.09    0.38
   1  15   0   -0.41    0.37
  -2 -15   0    2.64    0.48
   2  15   0    1.97    0.49
  -3 -15   0    4.58    0.57
  -3 -15   0    4.17    0.52
   3  15   0    4.04    0.54
  -4 -15   0    1.07    0.45
  -4 -15   0    1.75    0.40
   4  15   0    1.05    0.40
  -5 -15   0    0.07    0.30
  -5 -15   0    0.10    0.43
   5  15   0   -0.29    0.38
  -6 -15   0   -0.01    0.41
  -6 -15   0    0.11    0.32
   6  15   0   -0.48    0.33
  -7 -15   0    0.71    0.45
  -7 -15   0    0.43    0.33
   7  15   0    0.43    0.43
  -1  16   0    0.61    0.48
   0 -16   0    2.03    0.45
   0  16   0    1.54    0.50
  -1 -16   0    1.35    0.42
   1  16   0    0.78    0.46
  -2 -16   0    0.59    0.43
   2  16   0    0.20    0.39
  -3 -16   0   -0.35    0.40
   3  16   0    0.18    0.42
  -4 -16   0    0.79    0.38
  -4 -16   0    0.43    0.43
   4  16   0    0.31    0.39
   6  15  -1    0.15    0.41
  -6 -15   1    0.11    0.33
  -6 -15   1   -0.53    0.40
   5  15  -1    1.40    0.43
  -5 -15   1    1.12    0.39
  -5 -15   1    1.61    0.49
   4  15  -1    3.23    0.54
  -4 -15   1    3.81    0.52
  -4 -15   1    4.26    0.57
   3  15  -1    2.38    0.51
  -3 -15   1    3.16    0.53
   2  15  -1   -0.58    0.34
  -2 -15   1   -0.30    0.38
   1  15  -1    0.31    0.42
  -1 -15   1    0.27    0.38
   0  15  -1    0.66    0.42
   0 -15   1    0.77    0.39
  -1  15  -1    2.43    0.55
  -2  15  -1    1.54    0.52
  -3  15  -1    0.19    0.45
   8  14  -1    0.09    0.37
  -8 -14   1    0.30    0.32
  -8 -14   1    0.25    0.44
   7  14  -1    1.49    0.45
  -7 -14   1    1.16    0.37
  -7 -14   1    0.97    0.46
   6  14  -1    2.50    0.49
  -6 -14   1    3.69    0.55
  -6 -14   1    3.28    0.46
   5  14  -1    1.57    0.46
  -5 -14   1    1.11    0.37
  -5 -14   1    1.70    0.46
   4  14  -1    0.05    0.37
  -4 -14   1   -0.03    0.38
  -4 -14   1    0.11    0.33
   3  14  -1    1.33    0.44
  -3 -14   1    1.70    0.43
  -3 -14   1    1.48    0.40
   2  14  -1    4.10    0.55
  -2 -14   1    3.90    0.52
  -2 -14   1    4.35    0.53
   1  14  -1    2.23    0.50
  -1 -14   1    2.68    0.44
   0  14  -1    1.03    0.40
   0 -14   1    0.63    0.38
  -1  14  -1   -0.20    0.38
  -2  14  -1    1.23    0.46
  -3  14  -1    2.38    0.55
  -4  14  -1    2.16    0.55
  -5  14  -1    0.56    0.47
   9  13  -1    0.43    0.40
  -9 -13   1    0.06    0.28
  -9 -13   1    0.41    0.48
   8  13  -1   -0.07    0.36
  -8 -13   1    0.12    0.29
  -8 -13   1   -0.29    0.40
   7  13  -1   -0.38    0.34
  -7 -13   1   -0.21    0.38
  -7 -13   1    0.21    0.28
   6  13  -1    0.10    0.33
  -6 -13   1    0.58    0.31
  -6 -13   1    0.04    0.42
   5  13  -1    1.44    0.43
  -5 -13   1    1.31    0.35
  -5 -13   1    2.10    0.47
   4  13  -1    4.21    0.53
  -4 -13   1    3.99    0.48
  -4 -13   1    5.02    0.56
   3  13  -1    1.53    0.42
  -3 -13   1    1.27    0.37
  -3 -13   1    1.86    0.41
   2  13  -1    0.09    0.37
  -2 -13   1   -0.03    0.29
  -2 -13   1   -0.20    0.35
   1  13  -1    2.40    0.46
  -1 -13   1    2.42    0.41
   0  13  -1    5.19    0.59
   0 -13   1    5.68    0.49
  -1  13  -1    2.52    0.48
   1 -13   1    3.68    0.44
  -2  13  -1    2.52    0.51
  -3  13  -1   -0.32    0.37
  -4  13  -1    0.92    0.45
  -5  13  -1    1.57    0.48
  -6  13  -1    1.75    0.49
  10  12  -1   -0.12    0.35
 -10 -12   1    0.19    0.27
 -10 -12   1   -0.54    0.45
   9  12  -1    0.03    0.36
  -9 -12   1    0.10    0.43
  -9 -12   1    0.19    0.27
   8  12  -1    1.47    0.39
  -8 -12   1    1.61    0.47
  -8 -12   1    0.82    0.31
   7  12  -1    1.22    0.37
  -7 -12   1    1.95    0.46
  -7 -12   1    1.39    0.33
   6  12  -1    0.29    0.32
  -6 -12   1    1.18    0.42
  -6 -12   1    0.56    0.29
   5  12  -1   -0.12    0.31
  -5 -12   1    0.05    0.36
  -5 -12   1    0.37    0.26
   4  12  -1    1.01    0.37
  -4 -12   1    1.28    0.33
  -4 -12   1    1.81    0.41
   3  12  -1   10.57    0.66
  -3 -12   1   11.07    0.62
  -3 -12   1   11.09    0.65
   2  12  -1    8.49    0.58
  -2 -12   1    8.84    0.56
  -2 -12   1    8.90    0.58
   1  12  -1    4.40    0.50
  -1 -12   1    4.85    0.47
  -1 -12   1    5.00    0.49
   0  12  -1   -0.04    0.34
   0 -12   1   -0.01    0.31
  -1  12  -1    2.44    0.46
   1 -12   1    3.10    0.41
  -2  12  -1    5.68    0.60
   2 -12   1    7.10    0.48
  -3  12  -1    7.93    0.64
  -4  12  -1    1.98    0.47
  -5  12  -1   -0.37    0.36
   5 -12   1   -0.52    0.25
  -6  12  -1   -0.21    0.39
   6 -12   1    0.60    0.31
  -7  12  -1    1.25    0.42
  -7  12  -1    1.86    0.50
   7 -12   1    1.41    0.39
  11  11  -1    0.23    0.37
 -11 -11   1    0.61    0.48
 -11 -11   1    0.01    0.24
  10  11  -1    1.83    0.43
 -10 -11   1    1.63    0.50
 -10 -11   1    1.26    0.30
   9  11  -1    0.19    0.37
  -9 -11   1    0.86    0.29
  -9 -11   1    0.59    0.45
   8  11  -1    0.17    0.35
  -8 -11   1   -0.22    0.24
  -8 -11   1    0.07    0.39
   7  11  -1    0.57    0.33
  -7 -11   1    0.24    0.41
  -7 -11   1    0.54    0.27
   6  11  -1    2.04    0.40
  -6 -11   1    2.31    0.45
  -6 -11   1    2.01    0.33
   5  11  -1    3.89    0.47
  -5 -11   1    3.46    0.40
  -5 -11   1    4.01    0.48
   4  11  -1    6.51    0.49
  -4 -11   1    5.12    0.41
  -4 -11   1    5.63    0.50
   3  11  -1    0.08    0.33
  -3 -11   1    0.48    0.27
  -3 -11   1   -0.03    0.30
   2  11  -1    4.99    0.51
  -2 -11   1    4.85    0.44
  -2 -11   1    5.08    0.45
   1  11  -1   11.42    0.63
  -1 -11   1   12.27    0.62
  -1 -11   1   11.54    0.57
   0  11  -1   13.49    0.71
   0 -11   1   16.22    0.68
   0 -11   1   16.61    0.72
  -1  11  -1    8.21    0.60
   1 -11   1    9.99    0.53
  -2  11  -1    0.63    0.36
   2 -11   1   -0.01    0.27
   2 -11   1    0.72    0.22
  -3  11  -1    2.14    0.42
   3 -11   1    2.37    0.31
  -4  11  -1    9.51    0.57
  -4  11  -1    7.85    0.60
   4 -11   1    8.30    0.47
  -5  11  -1    6.92    0.61
  -5  11  -1    8.01    0.57
   5 -11   1    7.09    0.49
  -6  11  -1    2.50    0.42
  -6  11  -1    1.99    0.48
   6 -11   1    2.81    0.39
  -7  11  -1   -0.01    0.32
  -7  11  -1    0.35    0.37
   7 -11   1    0.36    0.31
  -8  11  -1    0.06    0.34
  -8  11  -1   -0.54    0.39
   8 -11   1   -0.16    0.31
  11  10  -1    0.06    0.36
 -11 -10   1   -0.17    0.22
 -11 -10   1    0.24    0.45
  10  10  -1    0.22    0.35
 -10 -10   1   -0.03    0.42
 -10 -10   1    0.06    0.22
   9  10  -1    3.63    0.48
  -9 -10   1    3.72    0.55
  -9 -10   1    3.15    0.36
   8  10  -1    5.71    0.51
  -8 -10   1    5.69    0.59
  -8 -10   1    4.45    0.37
   7  10  -1    3.86    0.47
  -7 -10   1    3.39    0.36
  -7 -10   1    3.62    0.50
   6  10  -1    0.87    0.34
  -6 -10   1    0.35    0.36
  -6 -10   1    0.74    0.26
   5  10  -1    0.97    0.33
  -5 -10   1    0.90    0.27
  -5 -10   1    0.14    0.33
   4  10  -1    5.37    0.45
  -4 -10   1    5.52    0.42
  -4 -10   1    6.22    0.50
   3  10  -1   23.86    0.88
  -3 -10   1   22.25    0.81
  -3 -10   1   23.39    0.85
   2  10  -1   17.55    0.75
  -2 -10   1   16.19    0.68
  -2 -10   1   16.51    0.69
   1  10  -1    0.60    0.31
  -1 -10   1    0.33    0.23
  -1 -10   1    0.34    0.29
   0  10  -1    1.40    0.35
   0 -10   1    2.01    0.33
   0 -10   1    2.29    0.32
  -1  10  -1   12.24    0.66
   1 -10   1   12.90    0.46
   1 -10   1   12.96    0.57
   1 -10   1   14.40    0.63
  -2  10  -1   29.03    0.93
  -2  10  -1   27.93    1.00
   2 -10   1   28.55    0.81
   2 -10   1   26.49    0.85
  -3  10  -1   16.52    0.68
  -3  10  -1   13.90    0.70
   3 -10   1   15.36    0.58
   3 -10   1   15.42    0.60
  -4  10  -1    2.02    0.42
  -4  10  -1    2.25    0.35
   4 -10   1    2.32    0.32
  -5  10  -1    0.42    0.29
  -5  10  -1    0.53    0.35
   5 -10   1    1.10    0.29
  -6  10  -1    4.66    0.48
  -6  10  -1    4.55    0.53
   6 -10   1    5.25    0.44
  -7  10  -1    4.06    0.47
  -7  10  -1    4.90    0.55
   7 -10   1    2.87    0.42
  -8  10  -1    2.91    0.45
  -8  10  -1    3.56    0.53
   8 -10   1    2.93    0.45
  -9  10  -1    0.72    0.36
  -9  10  -1    1.04    0.43
   9 -10   1    0.54    0.37
  12   9  -1    0.27    0.38
 -12  -9   1    0.04    0.21
 -12  -9   1   -0.12    0.43
  11   9  -1    1.74    0.42
 -11  -9   1    1.08    0.26
 -11  -9   1    1.33    0.47
  10   9  -1    4.70    0.51
 -10  -9   1    3.54    0.34
 -10  -9   1    5.44    0.61
   9   9  -1    1.16    0.38
  -9  -9   1    1.35    0.26
  -9  -9   1    1.60    0.44
   8   9  -1    0.11    0.33
  -8  -9   1    0.23    0.36
  -8  -9   1    0.93    0.25
   7   9  -1    2.98    0.39
  -7  -9   1    2.92    0.46
  -7  -9   1    3.20    0.33
   6   9  -1   11.76    0.60
  -6  -9   1   11.29    0.64
  -6  -9   1   11.27    0.53
   5   9  -1   10.21    0.56
  -5  -9   1   10.26    0.59
  -5  -9   1    9.72    0.49
   4   9  -1    9.63    0.56
  -4  -9   1   10.38    0.57
  -4  -9   1    9.99    0.50
   3   9  -1   -0.22    0.26
  -3  -9   1   -0.37    0.28
  -3  -9   1   -0.19    0.20
   2   9  -1   20.17    0.76
  -2  -9   1   19.23    0.71
  -2  -9   1   20.90    0.75
   1   9  -1   34.89    1.10
  -1  -9   1   33.94    1.02
  -1  -9   1   36.01    1.06
   0   9  -1   24.31    0.89
   0   9  -1   26.89    0.82
   0  -9   1   27.00    0.87
   0  -9   1   25.03    0.67
   0  -9   1   26.43    0.82
  -1   9  -1    9.79    0.47
  -1   9  -1    9.18    0.52
   1  -9   1    9.52    0.47
   1  -9   1    9.89    0.39
   1  -9   1    9.84    0.49
  -2   9  -1    0.56    0.24
  -2   9  -1    0.80    0.28
   2  -9   1    0.59    0.20
   2  -9   1    0.65    0.23
  -3   9  -1    6.97    0.45
  -3   9  -1    6.66    0.47
   3  -9   1    6.99    0.36
   3  -9   1    6.82    0.39
  -4   9  -1   18.72    0.73
  -4   9  -1   19.40    0.77
   4  -9   1   18.69    0.66
  -5   9  -1   11.21    0.63
  -5   9  -1   10.82    0.57
   5  -9   1   10.02    0.50
  -6   9  -1    1.69    0.33
  -6   9  -1    1.72    0.41
   6  -9   1    2.25    0.34
  -7   9  -1    0.20    0.27
  -7   9  -1   -0.51    0.30
   7  -9   1   -0.01    0.28
  -8   9  -1    0.88    0.32
  -8   9  -1    0.86    0.41
   8  -9   1    1.62    0.38
  -9   9  -1    1.37    0.37
  -9   9  -1    1.99    0.47
   9  -9   1    2.26    0.43
 -10   9  -1    1.72    0.47
 -10   9  -1    0.87    0.39
  10  -9   1    0.34    0.37
  12   8  -1    0.19    0.36
 -12  -8   1    0.33    0.20
 -12  -8   1    0.46    0.45
  11   8  -1    0.22    0.35
 -11  -8   1    0.50    0.43
 -11  -8   1    0.05    0.19
  10   8  -1    0.60    0.34
 -10  -8   1    0.55    0.21
 -10  -8   1    0.48    0.41
   9   8  -1    8.89    0.56
  -9  -8   1    8.07    0.41
  -9  -8   1    8.13    0.61
   8   8  -1    8.40    0.53
  -8  -8   1    8.59    0.43
  -8  -8   1    9.54    0.63
   7   8  -1    2.52    0.38
  -7  -8   1    2.10    0.27
  -7  -8   1    2.86    0.43
   6   8  -1    2.82    0.38
  -6  -8   1    2.50    0.41
  -6  -8   1    2.57    0.29
   5   8  -1    6.17    0.45
  -5  -8   1    6.49    0.49
  -5  -8   1    5.97    0.37
   4   8  -1   28.00    0.91
  -4  -8   1   27.29    0.91
  -4  -8   1   27.35    0.84
   3   8  -1   62.08    1.65
  -3  -8   1   63.31    1.64
  -3  -8   1   64.83    1.60
   2   8  -1   24.89    0.80
  -2  -8   1   23.40    0.54
  -2  -8   1   23.79    0.78
  -2  -8   1   22.82    0.75
   1   8  -1    4.83    0.37
   1   8  -1    5.00    0.30
  -1  -8   1    4.27    0.32
  -1  -8   1    4.13    0.37
  -1  -8   1    4.81    0.21
   0   8  -1    6.18    0.35
   0   8  -1    7.22    0.45
   0  -8   1    6.95    0.39
   0  -8   1    6.78    0.28
   0  -8   1    6.73    0.41
  -1   8  -1   17.58    0.68
  -1   8  -1   18.77    0.63
   1  -8   1   19.68    0.55
   1  -8   1   18.96    0.66
   1  -8   1   18.57    0.62
  -2   8  -1   15.37    0.58
  -2   8  -1   13.48    0.59
   2  -8   1   15.04    0.50
   2  -8   1   13.61    0.57
   2  -8   1   14.77    0.53
  -3   8  -1   16.31    0.61
  -3   8  -1   16.31    0.68
   3  -8   1   16.10    0.55
   3  -8   1   16.59    0.56
  -4   8  -1    0.02    0.26
  -4   8  -1   -0.21    0.19
   4  -8   1    0.07    0.22
   4  -8   1   -0.10    0.19
  -5   8  -1    6.53    0.42
  -5   8  -1    6.39    0.46
   5  -8   1    6.58    0.39
  -6   8  -1   11.67    0.56
  -6   8  -1   11.52    0.62
   6  -8   1   11.80    0.55
  -7   8  -1    7.94    0.56
  -7   8  -1    8.26    0.51
   7  -8   1    7.44    0.48
  -8   8  -1    1.13    0.40
  -8   8  -1    0.96    0.31
   8  -8   1    1.29    0.36
  -9   8  -1    0.43    0.29
  -9   8  -1   -0.68    0.33
   9  -8   1   -0.36    0.28
 -10   8  -1    0.28    0.41
 -10   8  -1    0.44    0.31
  10  -8   1    0.68    0.34
 -11   8  -1    1.09    0.44
 -11   8  -1    0.52    0.33
  13   7  -1    0.44    0.37
 -13  -7   1    0.35    0.17
 -13  -7   1   -0.04    0.43
  12   7  -1    0.48    0.36
 -12  -7   1    0.89    0.20
 -12  -7   1    0.85    0.46
  11   7  -1    1.56    0.40
 -11  -7   1    2.07    0.47
 -11  -7   1    1.61    0.22
  10   7  -1    4.41    0.47
 -10  -7   1    4.63    0.56
 -10  -7   1    3.58    0.27
   9   7  -1    0.74    0.32
  -9  -7   1    0.72    0.40
  -9  -7   1    0.38    0.19
   8   7  -1    1.46    0.31
  -8  -7   1    1.55    0.22
  -8  -7   1    1.62    0.39
   7   7  -1   24.19    0.83
  -7  -7   1   26.02    0.92
  -7  -7   1   24.12    0.72
   6   7  -1   15.47    0.63
  -6  -7   1   15.24    0.68
  -6  -7   1   15.20    0.53
   5   7  -1    3.15    0.34
  -5  -7   1    2.90    0.26
  -5  -7   1    3.15    0.38
   4   7  -1   10.63    0.49
  -4  -7   1    9.53    0.41
  -4  -7   1    9.26    0.49
   3   7  -1   14.16    0.56
  -3  -7   1   14.69    0.52
  -3  -7   1   15.17    0.59
  -3  -7   1   14.12    0.32
   2   7  -1   52.34    1.38
  -2  -7   1   51.03    1.36
  -2  -7   1   53.32    1.13
  -2  -7   1   54.42    1.35
   1   7  -1   57.35    1.35
   1   7  -1   55.64    1.44
  -1  -7   1   55.83    1.40
  -1  -7   1   52.35    1.20
  -1  -7   1   53.80    1.39
   0   7  -1   50.89    1.28
   0   7  -1   50.83    1.36
   0  -7   1   51.21    1.16
   0  -7   1   52.84    1.33
   0  -7   1   51.23    1.29
  -1   7  -1    0.53    0.18
  -1   7  -1    0.69    0.23
   1  -7   1    0.90    0.22
   1  -7   1    0.78    0.20
   1  -7   1    0.89    0.17
  -2   7  -1    2.53    0.31
  -2   7  -1    1.98    0.23
   2  -7   1    2.48    0.24
   2  -7   1    2.67    0.26
   2  -7   1    2.24    0.27
  -3   7  -1   12.64    0.54
  -3   7  -1   12.37    0.50
   3  -7   1   13.35    0.47
   3  -7   1   13.77    0.53
   3  -7   1   12.23    0.46
  -4   7  -1   21.10    0.72
  -4   7  -1   22.50    0.79
   4  -7   1   22.48    0.71
   4  -7   1   21.50    0.64
  -5   7  -1    9.27    0.47
  -5   7  -1    9.26    0.50
   5  -7   1    9.18    0.45
  -6   7  -1    0.04    0.27
  -6   7  -1   -0.14    0.20
   6  -7   1    0.41    0.24
  -7   7  -1    4.60    0.48
  -7   7  -1    4.34    0.39
   7  -7   1    4.77    0.45
  -8   7  -1    7.55    0.49
  -8   7  -1    7.00    0.53
   8  -7   1    6.55    0.47
  -9   7  -1    4.26    0.50
  -9   7  -1    3.95    0.42
   9  -7   1    4.25    0.49
 -10   7  -1   -0.17    0.26
 -10   7  -1    0.41    0.37
  10  -7   1    0.07    0.31
 -11   7  -1   -0.29    0.25
 -11   7  -1    0.01    0.37
  11  -7   1    0.02    0.33
  13   6  -1    0.86    0.37
 -13  -6   1    0.37    0.16
  12   6  -1   -0.05    0.34
 -12  -6   1    0.37    0.43
 -12  -6   1   -0.20    0.15
  11   6  -1   -0.18    0.30
 -11  -6   1   -0.02    0.37
 -11  -6   1   -0.17    0.14
  10   6  -1    1.41    0.35
 -10  -6   1    1.36    0.19
 -10  -6   1    1.75    0.41
   9   6  -1    7.13    0.47
  -9  -6   1    7.57    0.57
  -9  -6   1    6.00    0.30
   8   6  -1   14.30    0.61
  -8  -6   1   14.97    0.70
  -8  -6   1   14.54    0.48
   7   6  -1    0.35    0.27
  -7  -6   1    0.26    0.16
  -7  -6   1    0.70    0.33
   6   6  -1   41.64    1.19
  -6  -6   1   42.77    1.07
  -6  -6   1   43.58    1.05
  -6  -6   1   43.94    0.99
  -6  -6   1   43.33    1.25
   5   6  -1   29.93    0.89
  -5  -6   1   29.00    0.79
  -5  -6   1   29.03    0.93
  -5  -6   1   30.86    0.78
  -5  -6   1   29.82    0.68
   4   6  -1   33.52    0.95
  -4  -6   1   35.79    0.86
  -4  -6   1   31.99    0.87
  -4  -6   1   33.79    0.73
  -4  -6   1   31.50    0.97
   3   6  -1   50.25    1.29
  -3  -6   1   48.52    1.29
  -3  -6   1   50.43    1.04
  -3  -6   1   48.04    1.22
   2   6  -1    0.69    0.23
  -2  -6   1    0.77    0.10
  -2  -6   1    0.75    0.17
  -2  -6   1    0.78    0.24
   1   6  -1   11.04    0.39
   1   6  -1   10.62    0.47
  -1  -6   1   10.75    0.41
  -1  -6   1   10.54    0.44
  -1  -6   1   10.92    0.31
   0   6  -1   86.18    1.96
   0   6  -1   83.79    2.03
   0  -6   1   83.31    1.97
   0  -6   1   84.56    2.00
   0  -6   1   87.53    1.84
  -1   6  -1  104.43    2.52
  -1   6  -1  108.94    2.46
   1  -6   1  105.21    2.44
   1  -6   1  110.51    2.50
   1  -6   1  111.12    2.33
  -2   6  -1   81.58    1.95
  -2   6  -1   79.11    1.89
   2  -6   1   80.45    1.91
   2  -6   1   82.89    1.80
   2  -6   1   78.02    1.85
  -3   6  -1    6.68    0.38
  -3   6  -1    7.67    0.37
   3  -6   1    7.93    0.38
   3  -6   1    7.47    0.33
   3  -6   1    7.73    0.35
  -4   6  -1    1.17    0.28
  -4   6  -1    1.45    0.22
   4  -6   1    1.37    0.19
   4  -6   1    1.48    0.24
  -5   6  -1   14.86    0.57
  -5   6  -1   14.83    0.60
   5  -6   1   15.54    0.57
   5  -6   1   15.88    0.47
  -6   6  -1   21.19    0.76
  -6   6  -1   19.51    0.68
   6  -6   1   19.48    0.69
  -7   6  -1    4.34    0.36
  -7   6  -1    4.01    0.43
   7  -6   1    4.68    0.38
  -8   6  -1    0.31    0.31
  -8   6  -1    0.13    0.23
   8  -6   1   -0.16    0.24
  -9   6  -1    2.53    0.42
  -9   6  -1    2.65    0.35
   9  -6   1    2.93    0.41
 -10   6  -1    4.17    0.43
 -10   6  -1    5.94    0.53
  10  -6   1    5.06    0.51
 -11   6  -1    2.39    0.46
 -11   6  -1    1.45    0.33
  11  -6   1    1.03    0.37
 -12   6  -1    0.53    0.28
 -12   6  -1    0.83    0.42
  12  -6   1    0.23    0.33
  13   5  -1    1.53    0.39
  12   5  -1    2.99    0.44
 -12  -5   1    3.32    0.51
 -12  -5   1    2.15    0.18
  11   5  -1    2.46    0.39
 -11  -5   1    2.49    0.45
 -11  -5   1    2.06    0.18
  10   5  -1    0.76    0.31
 -10  -5   1    1.08    0.15
 -10  -5   1    1.05    0.40
   9   5  -1   -0.03    0.27
  -9  -5   1   -0.10    0.12
  -9  -5   1    0.01    0.12
  -9  -5   1   -0.24    0.20
  -9  -5   1    0.32    0.35
   8   5  -1    6.80    0.47
   8   5  -1    6.99    0.45
  -8  -5   1    6.79    0.28
  -8  -5   1    7.86    0.51
  -8  -5   1    7.34    0.36
  -8  -5   1    6.90    0.27
   7   5  -1   63.87    1.68
  -7  -5   1   68.21    1.52
  -7  -5   1   66.83    1.52
  -7  -5   1   66.71    1.51
   6   5  -1   68.19    1.72
   6   5  -1   69.48    1.74
  -6  -5   1   69.52    1.56
  -6  -5   1   69.30    1.53
  -6  -5   1   68.07    1.58
   5   5  -1    3.83    0.29
   5   5  -1    3.98    0.35
  -5  -5   1    4.22    0.24
  -5  -5   1    4.73    0.22
  -5  -5   1    4.12    0.22
   4   5  -1    0.15    0.18
  -4  -5   1    0.41    0.25
  -4  -5   1    0.57    0.14
  -4  -5   1    0.33    0.13
  -4  -5   1    0.39    0.10
   3   5  -1   41.53    1.10
  -3  -5   1   42.28    1.12
  -3  -5   1   43.93    1.02
  -3  -5   1   42.06    0.91
  -3  -5   1   42.44    1.04
   2   5  -1  108.38    2.44
  -2  -5   1  110.88    2.19
  -2  -5   1   96.69    2.36
  -2  -5   1  105.43    2.42
   1   5  -1  115.02    2.63
   1   5  -1  117.03    2.54
  -1  -5   1  113.60    2.60
  -1  -5   1  112.58    2.39
  -1  -5   1  115.87    2.59
   0   5  -1    3.11    0.22
   0   5  -1    2.61    0.26
   0  -5   1    2.43    0.22
   0  -5   1    2.75    0.25
   0  -5   1    2.97    0.18
  -1   5  -1    0.40    0.14
  -1   5  -1    0.33    0.18
   1  -5   1    0.45    0.16
   1  -5   1    0.50    0.16
   1  -5   1    0.46    0.13
  -2   5  -1   37.59    0.95
  -2   5  -1   35.96    0.98
   2  -5   1   37.02    0.91
   2  -5   1   37.63    0.96
   2  -5   1   36.26    0.90
  -3   5  -1  120.66    2.73
  -3   5  -1  117.18    2.78
   3  -5   1  120.66    2.63
   3  -5   1  117.89    2.67
   3  -5   1  126.92    2.74
  -4   5  -1   42.26    1.10
  -4   5  -1   42.76    1.15
   4  -5   1   44.09    1.02
   4  -5   1   42.42    1.09
  -5   5  -1   17.49    0.63
  -5   5  -1   16.39    0.57
   5  -5   1   17.11    0.47
   5  -5   1   16.24    0.58
  -6   5  -1    0.02    0.19
  -6   5  -1    0.17    0.26
   6  -5   1   -0.10    0.20
  -7   5  -1    5.23    0.43
  -7   5  -1    5.56    0.37
   7  -5   1    6.06    0.40
  -8   5  -1    9.68    0.48
  -8   5  -1    9.00    0.53
   8  -5   1    9.82    0.52
  -9   5  -1    5.47    0.41
  -9   5  -1    5.60    0.47
   9  -5   1    4.34    0.45
 -10   5  -1    0.04    0.24
 -10   5  -1   -0.08    0.32
  10  -5   1   -0.34    0.28
 -11   5  -1    0.70    0.28
 -11   5  -1    1.08    0.40
  11  -5   1    0.92    0.35
 -12   5  -1    1.18    0.31
 -12   5  -1    1.34    0.43
  12  -5   1    0.83    0.36
 -13  -4   1    0.67    0.44
  12   4  -1    0.30    0.34
 -12  -4   1   -0.26    0.37
  11   4  -1    0.82    0.30
  11   4  -1    1.04    0.35
 -11  -4   1    0.99    0.11
 -11  -4   1    1.01    0.40
  10   4  -1    7.08    0.46
  10   4  -1    7.09    0.41
 -10  -4   1    5.92    0.21
 -10  -4   1    7.44    0.54
 -10  -4   1    6.09    0.21
   9   4  -1   14.58    0.61
   9   4  -1   13.73    0.61
   9   4  -1   14.54    0.54
  -9  -4   1   13.60    0.36
  -9  -4   1   14.21    0.37
   8   4  -1   18.18    0.59
   8   4  -1   19.10    0.68
   8   4  -1   18.18    0.69
  -8  -4   1   17.40    0.45
  -8  -4   1   18.67    0.46
   7   4  -1    1.37    0.27
   7   4  -1    2.32    0.33
   7   4  -1    2.14    0.24
  -7  -4   1    2.09    0.14
  -7  -4   1    2.05    0.15
   6   4  -1   36.56    1.02
   6   4  -1   36.69    1.04
   6   4  -1   37.61    0.91
  -6  -4   1   37.80    0.86
  -6  -4   1   38.37    0.87
   5   4  -1   86.82    2.03
   5   4  -1   85.08    2.05
  -5  -4   1   86.86    1.86
  -5  -4   1   87.28    1.89
  -5  -4   1   85.08    1.90
   4   4  -1   47.88    1.21
   4   4  -1   47.12    1.19
  -4  -4   1   47.70    1.11
  -4  -4   1   47.74    1.06
  -4  -4   1   48.92    1.10
   3   4  -1    2.76    0.25
   3   4  -1    2.94    0.25
  -3  -4   1    2.97    0.14
  -3  -4   1    3.16    0.18
  -3  -4   1    2.74    0.19
   2   4  -1    8.47    0.34
  -2  -4   1    8.31    0.21
  -2  -4   1    7.38    0.33
  -2  -4   1    7.28    0.28
   1   4  -1   16.22    0.43
   1   4  -1   16.42    0.49
  -1  -4   1   14.53    0.45
  -1  -4   1   15.26    0.37
  -1  -4   1   15.46    0.48
   0   4  -1   75.23    1.72
   0   4  -1   74.72    1.67
   0  -4   1   73.68    1.69
   0  -4   1   72.50    1.58
   0  -4   1   74.20    1.70
  -1   4  -1   43.25    1.08
  -1   4  -1   43.72    1.05
   1  -4   1   44.65    1.07
   1  -4   1   44.49    1.00
   1  -4   1   42.63    1.03
  -2   4  -1   57.88    1.44
  -2   4  -1   59.15    1.40
   2  -4   1   58.97    1.36
   2  -4   1   62.02    1.36
   2  -4   1   62.23    1.42
  -3   4  -1   -0.30    0.17
  -3   4  -1   -0.06    0.12
   3  -4   1    0.02    0.13
   3  -4   1    0.00    0.13
   3  -4   1    0.03    0.12
  -4   4  -1   81.64    1.92
  -4   4  -1   83.60    1.99
   4  -4   1   82.24    1.89
   4  -4   1   85.36    1.85
  -5   4  -1   68.23    1.64
  -5   4  -1   68.68    1.71
   5  -4   1   70.58    1.64
  -6   4  -1   24.07    0.72
  -6   4  -1   24.89    0.79
   6  -4   1   24.44    0.76
  -7   4  -1    4.75    0.40
  -7   4  -1    4.59    0.33
   7  -4   1    4.06    0.37
  -8   4  -1   -0.29    0.28
  -8   4  -1   -0.06    0.19
   8  -4   1    0.13    0.25
  -9   4  -1    5.27    0.46
  -9   4  -1    5.40    0.37
   9  -4   1    4.65    0.41
 -10   4  -1    6.50    0.42
 -10   4  -1    7.53    0.54
  10  -4   1    7.03    0.50
 -11   4  -1    2.52    0.44
 -11   4  -1    2.01    0.31
  11  -4   1    2.27    0.39
 -12   4  -1   -0.05    0.23
 -12   4  -1    0.05    0.36
  12  -4   1    0.15    0.35
 -13  -3   1    3.51    0.55
  12   3  -1    2.58    0.39
  12   3  -1    2.34    0.40
 -12  -3   1    2.55    0.46
  11   3  -1    0.76    0.33
  11   3  -1    0.35    0.25
 -11  -3   1    0.49    0.36
  10   3  -1   -0.20    0.23
  10   3  -1   -0.49    0.24
  10   3  -1   -0.11    0.25
   9   3  -1    4.31    0.31
   9   3  -1    4.60    0.38
   9   3  -1    4.41    0.41
   8   3  -1   16.22    0.62
   8   3  -1   17.40    0.58
   8   3  -1   17.02    0.63
   7   3  -1   62.25    1.56
   7   3  -1   61.86    1.55
   7   3  -1   61.21    1.45
   6   3  -1   78.54    1.86
   6   3  -1   75.83    1.86
   6   3  -1   77.49    1.73
   5   3  -1   15.65    0.55
   5   3  -1   16.86    0.54
   5   3  -1   16.26    0.46
  -5  -3   1   16.40    0.38
  -5  -3   1   17.17    0.38
   4   3  -1   27.58    0.66
   4   3  -1   28.55    0.75
   4   3  -1   27.69    0.77
  -4  -3   1   27.46    0.64
  -4  -3   1   27.59    0.64
   3   3  -1  139.58    3.14
   3   3  -1  142.13    3.14
  -3  -3   1  141.85    2.93
  -3  -3   1  139.19    3.05
  -3  -3   1  143.60    3.04
   2   3  -1   77.02    1.77
   2   3  -1   80.28    1.77
  -2  -3   1   74.63    1.71
  -2  -3   1   76.83    1.61
  -2  -3   1   78.17    1.70
   1   3  -1    1.59    0.13
   1   3  -1    1.87    0.17
   1   3  -1    1.40    0.17
  -1  -3   1    1.47    0.14
  -1  -3   1    1.46    0.17
  -1  -3   1    1.41    0.09
   0   3  -1   40.76    0.95
   0   3  -1   40.58    0.99
   0  -3   1   40.95    0.97
   0  -3   1   40.05    0.96
   0  -3   1   41.25    0.89
  -1   3  -1  116.09    2.66
  -1   3  -1  116.64    2.62
   1  -3   1  123.93    2.52
   1  -3   1  123.32    2.64
   1  -3   1  117.70    2.60
  -2   3  -1   10.59    0.35
  -2   3  -1   11.01    0.38
   2  -3   1   11.84    0.37
   2  -3   1   11.13    0.32
   2  -3   1   10.41    0.34
  -3   3  -1  111.28    2.40
  -3   3  -1  105.58    2.45
   3  -3   1  110.62    2.35
   3  -3   1  103.44    2.33
  -4   3  -1  132.51    2.96
  -4   3  -1  134.01    3.04
   4  -3   1  132.93    2.90
   4  -3   1  135.35    2.90
  -5   3  -1    0.61    0.16
  -5   3  -1   -0.08    0.20
  -5   3  -1    0.33    0.15
   5  -3   1    0.43    0.18
   5  -3   1    0.46    0.12
  -6   3  -1   17.54    0.63
  -6   3  -1   18.63    0.57
  -6   3  -1   19.13    0.58
   6  -3   1   18.11    0.48
   6  -3   1   18.76    0.62
  -7   3  -1   17.00    0.57
  -7   3  -1   18.08    0.67
   7  -3   1   18.01    0.64
  -8   3  -1   20.40    0.66
  -8   3  -1   21.07    0.77
   8  -3   1   21.75    0.75
  -9   3  -1    6.90    0.49
  -9   3  -1    5.92    0.36
   9  -3   1    6.84    0.46
 -10   3  -1    0.24    0.22
 -10   3  -1    0.43    0.33
  10  -3   1    0.19    0.28
 -11   3  -1    1.39    0.27
 -11   3  -1    1.46    0.40
  11  -3   1    1.56    0.36
 -12   3  -1    1.60    0.42
 -12   3  -1    1.14    0.28
  12  -3   1    0.73    0.37
 -13   3  -1   -0.06    0.37
 -13   3  -1    0.59    0.25
  13  -3   1    0.22    0.33
  13   2  -1   -0.38    0.27
 -13  -2   1    0.39    0.39
 -13  -2   1    0.24    0.11
  12   2  -1    0.48    0.29
 -12  -2   1    0.33    0.11
 -12  -2   1    0.80    0.39
  11   2  -1    1.02    0.31
  11   2  -1    1.49    0.34
 -11  -2   1    1.28    0.39
  10   2  -1    6.49    0.43
  10   2  -1    6.16    0.40
  10   2  -1    6.02    0.43
   9   2  -1    7.45    0.45
   9   2  -1    7.29    0.44
   9   2  -1    8.20    0.43
   8   2  -1    2.89    0.29
   8   2  -1    2.97    0.33
   8   2  -1    2.33    0.32
   7   2  -1    6.50    0.38
   7   2  -1    7.37    0.35
   7   2  -1    6.95    0.40
   6   2  -1   74.34    1.67
   6   2  -1   72.64    1.76
   6   2  -1   74.69    1.77
   5   2  -1   61.57    1.47
   5   2  -1   61.17    1.48
   5   2  -1   61.90    1.39
   4   2  -1  111.05    2.53
   4   2  -1  111.73    2.53
   4   2  -1  114.69    2.39
   3   2  -1    4.62    0.23
   3   2  -1    5.16    0.24
   3   2  -1    4.67    0.19
  -3  -2   1    4.61    0.13
  -3  -2   1    4.62    0.13
   2   2  -1  142.17    3.12
   2   2  -1  139.90    3.13
  -2  -2   1  141.71    3.05
  -2  -2   1  143.83    2.94
  -2  -2   1  144.55    3.05
   1   2  -1   42.85    1.00
   1   2  -1   43.48    0.99
  -1  -2   1   43.19    0.91
  -1  -2   1   42.30    0.97
   0   2  -1   71.31    1.56
   0   2  -1   72.10    1.59
   0  -2   1   69.74    1.57
   0  -2   1   74.81    1.58
   0  -2   1   66.60    1.48
  -1   2  -1   47.24    1.09
  -1   2  -1   47.69    1.11
   1  -2   1   49.73    1.10
   1  -2   1   47.96    1.07
   1  -2   1   47.79    1.05
  -2   2  -1   14.70    0.41
  -2   2  -1   14.30    0.44
   2  -2   1   15.79    0.43
   2  -2   1   15.26    0.37
   2  -2   1   15.89    0.42
  -3   2  -1   11.66    0.41
  -3   2  -1   11.84    0.36
   3  -2   1   12.42    0.31
   3  -2   1   12.55    0.38
  -4   2  -1   81.67    1.92
  -4   2  -1   81.29    1.84
  -4   2  -1   83.83    1.85
   4  -2   1   81.13    1.79
   4  -2   1   81.77    1.83
  -5   2  -1  133.60    3.06
  -5   2  -1  131.37    2.95
  -5   2  -1  139.33    2.97
   5  -2   1  132.75    2.92
   5  -2   1  132.74    2.90
  -6   2  -1    6.33    0.29
  -6   2  -1    6.05    0.28
  -6   2  -1    5.70    0.35
   6  -2   1    6.61    0.25
   6  -2   1    6.45    0.35
  -7   2  -1    4.01    0.26
  -7   2  -1    4.00    0.38
  -7   2  -1    3.66    0.25
   7  -2   1    4.40    0.33
   7  -2   1    4.19    0.22
  -8   2  -1    4.83    0.31
  -8   2  -1    4.88    0.42
   8  -2   1    5.11    0.39
  -9   2  -1   14.28    0.66
  -9   2  -1   14.35    0.52
   9  -2   1   15.84    0.64
 -10   2  -1   11.59    0.48
 -10   2  -1   12.29    0.63
  10  -2   1   10.85    0.57
 -11   2  -1    2.85    0.30
 -11   2  -1    2.72    0.45
  11  -2   1    2.81    0.42
 -12   2  -1    0.30    0.38
 -12   2  -1   -0.11    0.21
  12  -2   1   -0.06    0.30
 -13   2  -1    0.36    0.39
 -13   2  -1    0.41    0.24
  13  -2   1   -0.07    0.31
  13   1  -1    2.03    0.40
 -13  -1   1    1.63    0.44
 -13  -1   1    1.52    0.18
  12   1  -1    1.20    0.34
 -12  -1   1    0.96    0.15
 -12  -1   1    1.09    0.41
  11   1  -1    0.05    0.26
 -11  -1   1   -0.05    0.32
 -11  -1   1    0.13    0.12
  10   1  -1    1.84    0.32
  10   1  -1    1.22    0.29
 -10  -1   1    1.55    0.14
 -10  -1   1    1.86    0.38
 -10  -1   1    1.46    0.12
   9   1  -1    5.38    0.37
   9   1  -1    5.45    0.38
   9   1  -1    5.58    0.39
   8   1  -1   18.78    0.64
   8   1  -1   17.61    0.60
   8   1  -1   17.04    0.61
   7   1  -1   38.32    1.03
   7   1  -1   37.08    1.01
   7   1  -1   38.84    0.99
   6   1  -1   -0.12    0.18
   6   1  -1   -0.26    0.15
   6   1  -1   -0.10    0.17
   5   1  -1    8.46    0.35
   5   1  -1    9.14    0.36
   5   1  -1    8.73    0.33
   4   1  -1  105.05    2.22
   4   1  -1  103.44    2.34
   4   1  -1  103.43    2.33
   3   1  -1  796.33   17.39
   3   1  -1  808.03   17.19
   3   1  -1  791.71   16.40
   2   1  -1   34.19    0.80
   2   1  -1   33.99    0.74
   2   1  -1   32.69    0.78
   1   1  -1   14.69    0.38
   1   1  -1   14.54    0.37
  -1  -1   1   14.30    0.34
  -1  -1   1   14.45    0.34
  -1  -1   1   14.23    0.34
   0   1  -1  271.89    5.88
   0   1  -1  275.67    5.77
   0   1  -1  269.48    5.78
   0  -1   1  281.29    5.78
   0  -1   1  246.96    5.55
  -1   1  -1  246.20    5.40
  -1   1  -1  250.25    5.36
   1  -1   1  246.76    5.36
   1  -1   1  257.48    5.37
   1  -1   1  252.46    5.17
  -2   1  -1   22.28    0.58
  -2   1  -1   23.13    0.55
  -2   1  -1   22.71    0.55
   2  -1   1   22.71    0.55
   2  -1   1   22.73    0.50
  -3   1  -1   16.71    0.49
  -3   1  -1   17.55    0.44
  -3   1  -1   16.97    0.44
   3  -1   1   17.06    0.46
   3  -1   1   16.98    0.40
  -4   1  -1   43.56    1.01
  -4   1  -1   44.86    1.01
  -4   1  -1   43.06    1.09
   4  -1   1   42.94    0.98
  -5   1  -1    0.03    0.10
  -5   1  -1    0.01    0.10
  -5   1  -1    0.33    0.20
   5  -1   1    0.01    0.15
   5  -1   1   -0.05    0.11
  -6   1  -1   92.69    2.25
  -6   1  -1   94.10    2.12
  -6   1  -1   97.55    2.12
   6  -1   1   95.39    2.15
   6  -1   1   95.58    2.11
  -7   1  -1   71.38    1.60
  -7   1  -1   68.69    1.75
  -7   1  -1   67.62    1.59
   7  -1   1   68.71    1.66
   7  -1   1   70.44    1.59
  -8   1  -1   20.51    0.60
  -8   1  -1   19.85    0.75
  -8   1  -1   21.09    0.60
   8  -1   1   20.52    0.70
   8  -1   1   21.24    0.59
  -9   1  -1    3.60    0.27
  -9   1  -1    3.86    0.43
   9  -1   1    4.21    0.40
 -10   1  -1    1.63    0.23
 -10   1  -1    2.68    0.42
  10  -1   1    2.66    0.36
 -11   1  -1    3.58    0.30
 -11   1  -1    4.35    0.50
  11  -1   1    3.77    0.45
 -12   1  -1    2.50    0.47
 -12   1  -1    1.92    0.26
  12  -1   1    2.13    0.39
 -13   1  -1   -0.04    0.20
 -13   1  -1    0.29    0.39
  13  -1   1   -0.31    0.29
  13   0  -1   -0.12    0.31
 -13   0   1   -0.01    0.16
  12   0  -1    0.89    0.35
 -12   0   1    1.99    0.43
 -12   0   1    1.19    0.19
  11   0  -1    5.04    0.48
 -11   0   1    4.63    0.25
 -11   0   1    5.76    0.51
  10   0  -1    5.24    0.42
  10   0  -1    6.28    0.40
 -10   0   1    5.45    0.46
 -10   0   1    5.51    0.24
 -10   0   1    5.27    0.25
   9   0  -1    2.98    0.32
   9   0  -1    2.35    0.32
  -9   0   1    2.62    0.17
  -9   0   1    2.50    0.37
  -9   0   1    2.67    0.17
   8   0  -1    2.27    0.29
   8   0  -1    1.98    0.27
  -8   0   1    2.26    0.34
  -8   0   1    1.83    0.13
  -8   0   1    1.88    0.13
   7   0  -1   26.69    0.75
   7   0  -1   25.76    0.77
   7   0  -1   25.46    0.75
   6   0  -1   73.17    1.72
   6   0  -1   71.57    1.66
   6   0  -1   71.45    1.69
   5   0  -1    5.67    0.27
   5   0  -1    5.40    0.28
   5   0  -1    5.27    0.27
   4   0  -1    8.54    0.30
   4   0  -1    8.80    0.31
   4   0  -1    8.18    0.31
   3   0  -1  130.59    2.84
   3   0  -1  131.31    2.72
   3   0  -1  126.80    2.83
   2   0  -1  408.64    8.93
   2   0  -1  417.55    8.72
   2   0  -1  429.12    9.07
   1   0  -1 1000.00   21.45
  -1   0  -1  133.75    2.85
  -1   0  -1  133.03    2.85
  -1   0  -1  132.51    2.89
  -2   0  -1   52.91    1.16
  -2   0  -1   52.81    1.16
   2   0   1   52.96    1.15
   2   0   1   52.80    1.21
   2   0   1   53.45    1.15
  -3   0  -1  112.53    2.43
  -3   0  -1  112.20    2.43
   3   0   1  111.94    2.39
   3   0   1  115.02    2.44
   3   0   1  113.33    2.52
  -4   0  -1   72.50    1.61
  -4   0  -1   73.14    1.61
   4   0   1   75.52    1.72
   4   0   1   74.37    1.63
   4   0   1   72.46    1.63
  -5   0  -1   58.57    1.46
  -5   0  -1   58.72    1.33
  -5   0  -1   58.90    1.33
   5   0   1   61.43    1.45
   5   0   1   61.00    1.38
   5   0   1   60.90    1.36
  -6   0  -1   17.18    0.61
  -6   0  -1   17.57    0.45
  -6   0  -1   17.40    0.46
   6   0   1   18.05    0.50
   6   0   1   17.00    0.55
  -7   0  -1    5.95    0.25
  -7   0  -1    5.82    0.25
  -7   0  -1    6.13    0.42
   7   0   1    7.26    0.38
   7   0   1    6.05    0.30
  -8   0  -1   11.47    0.37
  -8   0  -1   10.46    0.37
  -8   0  -1   11.11    0.55
   8   0   1   11.79    0.42
   8   0   1   10.72    0.48
  -9   0  -1   15.99    0.68
  -9   0  -1   15.29    0.48
   9   0   1   15.71    0.63
 -10   0  -1    7.17    0.33
 -10   0  -1    7.65    0.52
  10   0   1    7.28    0.45
 -11   0  -1    0.35    0.36
 -11   0  -1    0.60    0.19
  11   0   1    0.95    0.31
 -12   0  -1    0.34    0.38
 -12   0  -1    0.47    0.20
  12   0   1    0.50    0.32
 -13   0  -1    1.18    0.24
 -13   0  -1    1.54    0.44
  13   0   1    0.77    0.35
  13  -1  -1    1.33    0.40
 -13   1   1    1.09    0.22
  12  -1  -1    0.15    0.32
 -12   1   1    0.20    0.36
 -12   1   1    0.67    0.19
  11  -1  -1   -0.50    0.25
 -11   1   1    0.31    0.17
 -11   1   1   -0.15    0.32
  10  -1  -1    5.09    0.40
 -10   1   1    5.44    0.47
 -10   1   1    4.93    0.27
   9  -1  -1    5.79    0.36
   9  -1  -1    5.81    0.40
  -9   1   1    6.58    0.44
  -9   1   1    5.49    0.27
  -9   1   1    5.99    0.27
   8  -1  -1   12.95    0.54
   8  -1  -1   13.97    0.49
  -8   1   1   13.90    0.57
  -8   1   1   13.40    0.40
  -8   1   1   13.40    0.40
   7  -1  -1   21.33    0.64
   7  -1  -1   21.21    0.67
  -7   1   1   21.02    0.53
  -7   1   1   21.44    0.54
  -7   1   1   20.78    0.69
   6  -1  -1    9.79    0.39
   6  -1  -1    9.29    0.37
  -6   1   1    9.93    0.42
  -6   1   1    9.43    0.28
  -6   1   1    9.33    0.27
   5  -1  -1   77.44    1.74
   5  -1  -1   76.94    1.76
  -5   1   1   77.46    1.81
  -5   1   1   77.08    1.67
  -5   1   1   76.76    1.67
   4  -1  -1  189.56    4.10
   4  -1  -1  191.00    3.97
  -4   1   1  187.96    4.01
  -4   1   1  188.87    4.01
  -4   1   1  186.09    4.15
   3  -1  -1  254.06    5.59
   3  -1  -1  261.30    5.38
  -3   1   1  260.05    5.63
  -3   1   1  263.25    5.52
  -3   1   1  262.10    5.51
   2  -1  -1   63.20    1.37
   2  -1  -1   62.73    1.42
  -2   1   1   63.97    1.37
  -2   1   1   64.75    1.38
  -2   1   1   65.19    1.42
   1  -1  -1   36.58    0.83
  -1   1   1   36.26    0.82
  -1   1   1   36.45    0.81
  -1   1   1   36.73    0.81
  -1  -1  -1  436.06    9.49
  -1  -1  -1  442.96    9.44
  -1  -1  -1  429.28    9.41
   1   1   1  451.06    9.07
   1   1   1  436.98    9.52
  -2  -1  -1  278.87    6.17
  -2  -1  -1  288.16    6.12
  -2  -1  -1  293.80    6.11
   2   1   1  283.49    5.96
   2   1   1  290.75    6.19
  -3  -1  -1  153.74    3.28
   3   1   1  153.22    3.23
   3   1   1  155.14    3.41
   3   1   1  156.98    3.35
  -4  -1  -1   10.65    0.24
   4   1   1   10.71    0.34
   4   1   1   10.98    0.33
   4   1   1   10.24    0.36
  -5  -1  -1    8.47    0.21
  -5  -1  -1    8.18    0.21
   5   1   1    8.08    0.30
   5   1   1    8.48    0.32
   5   1   1    7.92    0.34
  -6  -1  -1   67.49    1.48
  -6  -1  -1   70.07    1.49
   6   1   1   65.94    1.56
   6   1   1   68.75    1.66
   6   1   1   68.16    1.58
  -7  -1  -1   44.45    1.01
  -7  -1  -1   44.05    1.01
   7   1   1   44.64    1.11
   7   1   1   45.80    1.20
   7   1   1   44.50    1.12
  -8  -1  -1   21.74    0.57
  -8  -1  -1   21.88    0.78
  -8  -1  -1   22.81    0.57
   8   1   1   23.24    0.67
   8   1   1   22.61    0.76
   8   1   1   22.45    0.70
  -9  -1  -1   -0.12    0.30
  -9  -1  -1    0.01    0.13
  -9  -1  -1    0.03    0.13
   9   1   1   -0.09    0.22
   9   1   1   -0.18    0.20
 -10  -1  -1    3.70    0.25
 -10  -1  -1    4.10    0.47
  10   1   1    5.45    0.41
 -11  -1  -1    3.32    0.25
 -11  -1  -1    4.01    0.49
  11   1   1    3.61    0.42
 -12  -1  -1    1.85    0.23
 -12  -1  -1    1.74    0.47
  12   1   1    1.25    0.34
 -13  -1  -1   -0.72    0.36
 -13  -1  -1   -0.22    0.16
  13   1   1    0.22    0.30
  13  -2  -1    0.53    0.36
 -13   2   1    0.56    0.22
  12  -2  -1    3.45    0.45
 -12   2   1    2.96    0.29
 -12   2   1    4.31    0.51
  11  -2  -1    5.48    0.46
 -11   2   1    6.13    0.52
 -11   2   1    5.14    0.32
  10  -2  -1    2.26    0.36
 -10   2   1    2.50    0.24
 -10   2   1    3.12    0.41
   9  -2  -1    0.03    0.25
   9  -2  -1    0.02    0.21
  -9   2   1    0.30    0.16
  -9   2   1   -0.52    0.26
   8  -2  -1    0.75    0.25
   8  -2  -1    0.63    0.21
  -8   2   1    0.81    0.28
  -8   2   1    0.94    0.17
  -8   2   1    0.53    0.16
   7  -2  -1   25.83    0.77
   7  -2  -1   26.81    0.72
  -7   2   1   24.89    0.66
  -7   2   1   25.35    0.67
  -7   2   1   24.72    0.78
   6  -2  -1   61.39    1.45
   6  -2  -1   60.33    1.47
  -6   2   1   62.71    1.52
  -6   2   1   61.67    1.41
  -6   2   1   60.87    1.39
   5  -2  -1   41.59    1.03
   5  -2  -1   41.62    1.01
  -5   2   1   42.03    0.98
  -5   2   1   42.33    1.06
  -5   2   1   41.03    0.96
   4  -2  -1    2.66    0.22
   4  -2  -1    1.95    0.18
  -4   2   1    2.13    0.14
  -4   2   1    2.33    0.21
  -4   2   1    2.15    0.16
   3  -2  -1   66.42    1.48
   3  -2  -1   65.89    1.45
  -3   2   1   66.33    1.46
  -3   2   1   64.66    1.45
  -3   2   1   66.54    1.51
   2  -2  -1  133.48    2.77
   2  -2  -1  133.55    2.88
  -2   2   1  133.22    2.89
  -2   2   1  130.51    2.85
  -2   2   1  131.36    2.86
   1  -2  -1  573.48   11.69
   1  -2  -1  575.63   12.11
   1  -2  -1  558.64   12.15
  -1   2   1  556.64   12.18
  -1   2   1  558.90   12.23
   0  -2  -1  218.04    4.44
   0  -2  -1  203.22    4.59
   0   2   1  210.66    4.62
   0   2   1  222.71    4.69
  -1  -2  -1   13.54    0.37
  -1  -2  -1   13.88    0.35
  -1  -2  -1   13.93    0.35
   1   2   1   14.98    0.37
   1   2   1   13.85    0.31
  -2  -2  -1    0.72    0.07
  -2  -2  -1    0.95    0.07
  -2  -2  -1    1.00    0.12
   2   2   1    1.18    0.13
   2   2   1    0.96    0.08
  -3  -2  -1   65.06    1.52
  -3  -2  -1   67.84    1.43
  -3  -2  -1   67.46    1.43
   3   2   1   68.08    1.54
   3   2   1   66.26    1.43
   4   2   1   91.97    2.11
   4   2   1   94.95    2.07
   4   2   1   90.18    1.97
   5   2   1   61.47    1.48
   5   2   1   59.57    1.37
   5   2   1   61.84    1.43
   6   2   1   -0.07    0.20
   6   2   1    0.05    0.15
   6   2   1   -0.31    0.17
  -7  -2  -1    0.72    0.08
  -7  -2  -1    0.65    0.08
   7   2   1    0.61    0.19
   7   2   1    0.56    0.21
   7   2   1    0.83    0.24
  -8  -2  -1    7.46    0.24
  -8  -2  -1    7.67    0.25
   8   2   1    7.11    0.37
   8   2   1    7.81    0.40
   8   2   1    8.03    0.45
  -9  -2  -1   14.45    0.56
  -9  -2  -1   13.88    0.39
  -9  -2  -1   13.46    0.40
   9   2   1   14.54    0.61
   9   2   1   13.96    0.56
 -10  -2  -1    1.09    0.16
 -10  -2  -1    1.01    0.16
 -10  -2  -1    0.93    0.30
 -10  -2  -1    0.58    0.32
  10   2   1    0.84    0.27
  10   2   1    0.96    0.30
 -11  -2  -1   -0.08    0.14
 -11  -2  -1   -0.06    0.34
  11   2   1   -0.03    0.25
 -12  -2  -1    2.17    0.22
 -12  -2  -1    3.03    0.51
  12   2   1    2.47    0.38
 -13  -2  -1    2.44    0.52
 -13  -2  -1    1.87    0.21
  13   2   1    1.81    0.36
 -14  -2  -1    0.22    0.17
  13  -3  -1    0.60    0.38
 -13   3   1    0.58    0.24
  12  -3  -1   -0.29    0.29
 -12   3   1    0.49    0.22
 -12   3   1   -0.77    0.34
  11  -3  -1    1.31    0.36
 -11   3   1    0.92    0.23
 -11   3   1    0.62    0.35
  10  -3  -1    5.99    0.48
 -10   3   1    6.57    0.47
 -10   3   1    5.89    0.35
   9  -3  -1    8.95    0.53
  -9   3   1    9.50    0.53
  -9   3   1    8.88    0.39
   8  -3  -1    8.98    0.39
   8  -3  -1    9.05    0.47
  -8   3   1    8.47    0.47
  -8   3   1    7.70    0.36
   7  -3  -1    0.09    0.22
   7  -3  -1   -0.24    0.17
  -7   3   1    0.26    0.15
  -7   3   1   -0.17    0.23
  -7   3   1    0.26    0.16
   6  -3  -1    9.12    0.36
   6  -3  -1   10.13    0.43
  -6   3   1    9.23    0.42
  -6   3   1   10.35    0.37
  -6   3   1    9.95    0.35
   5  -3  -1   60.43    1.40
   5  -3  -1   58.51    1.42
  -5   3   1   60.28    1.39
  -5   3   1   61.41    1.41
  -5   3   1   60.67    1.47
   4  -3  -1  102.96    2.29
   4  -3  -1  102.83    2.26
  -4   3   1  105.11    2.30
  -4   3   1  103.49    2.35
  -4   3   1  101.89    2.28
   3  -3  -1   13.34    0.39
   3  -3  -1   12.58    0.38
  -3   3   1   12.78    0.38
  -3   3   1   12.65    0.40
  -3   3   1   12.14    0.36
   2  -3  -1    0.48    0.12
   2  -3  -1    0.67    0.12
  -2   3   1    0.55    0.12
  -2   3   1    0.34    0.09
   1  -3  -1   78.94    1.72
   1  -3  -1   76.08    1.72
   1  -3  -1   78.33    1.64
  -1   3   1   75.49    1.71
  -1   3   1   78.13    1.73
   0  -3  -1  419.09    8.36
   0  -3  -1  403.18    8.67
   0  -3  -1  400.58    8.81
   0   3   1  403.64    8.85
   0   3   1  400.78    8.67
  -1  -3  -1  144.46    3.14
  -1  -3  -1  144.06    3.12
   1   3   1  142.72    2.93
   1   3   1  143.92    3.10
   1   3   1  144.70    3.16
  -2  -3  -1   70.01    1.53
  -2  -3  -1   68.36    1.59
  -2  -3  -1   69.19    1.54
   2   3   1   70.42    1.60
   2   3   1   71.73    1.44
  -3  -3  -1    1.62    0.10
  -3  -3  -1    1.62    0.18
  -3  -3  -1    1.65    0.11
   3   3   1    1.55    0.17
   3   3   1    1.64    0.12
  -4  -3  -1    5.88    0.17
  -4  -3  -1    5.76    0.29
  -4  -3  -1    5.84    0.18
   4   3   1    5.75    0.21
   4   3   1    5.70    0.28
  -5  -3  -1  156.65    3.35
  -5  -3  -1  154.60    3.50
  -5  -3  -1  158.34    3.35
   5   3   1  159.62    3.54
   5   3   1  157.50    3.31
  -6  -3  -1   71.19    1.75
  -6  -3  -1   73.93    1.59
  -6  -3  -1   74.72    1.59
   6   3   1   75.03    1.80
   6   3   1   74.90    1.75
   6   3   1   73.77    1.65
  -7  -3  -1   11.10    0.28
  -7  -3  -1   11.70    0.28
  -7  -3  -1   10.93    0.46
   7   3   1   11.47    0.49
   7   3   1   11.58    0.43
  -8  -3  -1    4.94    0.18
  -8  -3  -1    4.04    0.37
  -8  -3  -1    4.78    0.18
   8   3   1    5.19    0.31
   8   3   1    4.59    0.38
  -9  -3  -1    2.07    0.32
  -9  -3  -1    1.93    0.15
  -9  -3  -1    1.89    0.16
   9   3   1    1.82    0.29
   9   3   1    2.28    0.34
 -10  -3  -1    6.94    0.26
 -10  -3  -1    7.01    0.45
 -10  -3  -1    6.91    0.27
  10   3   1    6.60    0.42
  10   3   1    6.91    0.44
 -11  -3  -1    4.35    0.24
  11   3   1    4.49    0.37
  11   3   1    5.32    0.46
 -12  -3  -1    1.07    0.43
 -12  -3  -1    1.18    0.18
  12   3   1    1.42    0.33
 -13  -3  -1    0.25    0.16
 -13  -3  -1    0.57    0.42
  13   3   1    0.07    0.28
 -14  -3  -1    0.34    0.15
  13  -4  -1    0.39    0.35
 -13   4   1    0.65    0.27
  12  -4  -1    1.65    0.38
 -12   4   1    2.16    0.43
 -12   4   1    1.74    0.29
  11  -4  -1    1.49    0.37
 -11   4   1    1.55    0.40
 -11   4   1    1.99    0.28
  10  -4  -1   -0.18    0.27
 -10   4   1   -0.65    0.29
 -10   4   1   -0.10    0.20
   9  -4  -1    2.90    0.38
  -9   4   1    3.01    0.30
  -9   4   1    4.04    0.41
   8  -4  -1   12.52    0.56
  -8   4   1   11.86    0.47
  -8   4   1   11.35    0.54
   7  -4  -1   37.84    1.06
  -7   4   1   37.54    0.99
  -7   4   1   38.03    1.07
   6  -4  -1   29.92    0.77
   6  -4  -1   28.48    0.84
  -6   4   1   29.48    0.80
  -6   4   1   29.51    0.79
  -6   4   1   28.42    0.85
   5  -4  -1    6.46    0.34
   5  -4  -1    7.38    0.31
  -5   4   1    7.23    0.30
  -5   4   1    6.70    0.35
  -5   4   1    7.72    0.32
   4  -4  -1    9.61    0.34
   4  -4  -1    9.60    0.37
  -4   4   1    9.65    0.34
  -4   4   1    9.61    0.38
   3  -4  -1  211.59    4.55
   3  -4  -1  203.26    4.39
  -3   4   1  211.15    4.60
  -3   4   1  212.18    4.54
   2  -4  -1  225.54    4.67
   2  -4  -1  214.94    4.48
   2  -4  -1  213.22    4.67
  -2   4   1  210.98    4.71
  -2   4   1  212.19    4.65
   1  -4  -1  223.76    4.74
   1  -4  -1  221.82    4.53
   1  -4  -1  215.17    4.75
  -1   4   1  219.35    4.78
  -1   4   1  216.30    4.72
   0  -4  -1  111.92    2.52
   0  -4  -1  117.16    2.37
   0  -4  -1  110.59    2.52
   0   4   1  114.50    2.55
   0   4   1  116.66    2.50
  -1  -4  -1   45.29    1.15
  -1  -4  -1   50.93    1.18
   1   4   1   50.32    1.19
   1   4   1   52.48    1.14
  -2  -4  -1   87.89    1.89
  -2  -4  -1   82.06    1.90
  -2  -4  -1   84.54    1.94
   2   4   1   88.06    1.96
  -3  -4  -1   15.07    0.49
  -3  -4  -1   15.31    0.42
  -3  -4  -1   15.58    0.41
   3   4   1   16.31    0.36
   3   4   1   15.99    0.49
  -4  -4  -1  100.89    2.12
  -4  -4  -1   95.55    2.13
  -4  -4  -1   95.30    2.23
   4   4   1   98.35    2.04
   4   4   1   95.92    2.24
  -5  -4  -1   20.99    0.51
  -5  -4  -1   22.14    0.68
  -5  -4  -1   21.05    0.53
   5   4   1   21.16    0.54
   5   4   1   21.01    0.65
  -6  -4  -1    8.97    0.42
  -6  -4  -1    9.48    0.26
  -6  -4  -1    8.85    0.27
   6   4   1    8.80    0.33
   6   4   1    9.21    0.43
  -7  -4  -1   11.00    0.50
  -7  -4  -1   11.47    0.31
  -7  -4  -1   10.90    0.31
   7   4   1   11.54    0.50
   7   4   1   11.34    0.41
  -8  -4  -1   11.86    0.34
  -8  -4  -1   12.54    0.33
  -8  -4  -1   12.26    0.55
   8   4   1   11.64    0.45
   8   4   1   12.42    0.55
  -9  -4  -1    5.20    0.42
  -9  -4  -1    5.39    0.22
  -9  -4  -1    5.20    0.21
   9   4   1    5.31    0.42
   9   4   1    4.93    0.34
 -10  -4  -1   -0.17    0.28
 -10  -4  -1    0.03    0.11
 -10  -4  -1    0.33    0.13
  10   4   1    0.07    0.23
  10   4   1    0.16    0.28
 -11  -4  -1    0.74    0.34
 -11  -4  -1    0.97    0.17
  11   4   1    1.04    0.34
  11   4   1    0.66    0.29
 -12  -4  -1    4.00    0.24
  12   4   1    4.25    0.43
  12   4   1    4.01    0.50
 -13  -4  -1    1.67    0.19
 -13  -4  -1    1.79    0.50
  12  -5  -1   -0.29    0.29
 -12   5   1   -0.32    0.23
  11  -5  -1    1.14    0.35
 -11   5   1    0.71    0.26
 -11   5   1    1.43    0.39
  10  -5  -1    7.58    0.52
 -10   5   1    7.13    0.43
 -10   5   1    7.18    0.51
   9  -5  -1    4.71    0.46
  -9   5   1    4.56    0.35
  -9   5   1    4.76    0.45
   8  -5  -1    1.91    0.32
  -8   5   1    2.25    0.34
  -8   5   1    1.81    0.26
   7  -5  -1    3.56    0.28
   7  -5  -1    4.33    0.38
  -7   5   1    3.24    0.30
  -7   5   1    4.25    0.39
   6  -5  -1   58.82    1.48
   6  -5  -1   61.40    1.42
  -6   5   1   59.25    1.47
  -6   5   1   58.55    1.52
   5  -5  -1   61.37    1.49
   5  -5  -1   62.30    1.45
  -5   5   1   62.49    1.54
  -5   5   1   61.31    1.49
   4  -5  -1   68.90    1.59
   4  -5  -1   68.11    1.59
  -4   5   1   68.36    1.61
  -4   5   1   68.53    1.65
   3  -5  -1   36.59    0.90
   3  -5  -1   36.72    0.92
  -3   5   1   36.85    0.92
  -3   5   1   35.47    0.94
   2  -5  -1    1.45    0.20
   2  -5  -1    1.42    0.19
   2  -5  -1    1.16    0.16
  -2   5   1    1.30    0.20
  -2   5   1    0.88    0.15
   1  -5  -1    2.21    0.20
   1  -5  -1    2.34    0.20
   1  -5  -1    1.82    0.15
  -1   5   1    2.06    0.20
  -1   5   1    1.71    0.17
   0  -5  -1  197.59    4.38
   0  -5  -1  205.19    4.38
   0  -5  -1  204.07    4.13
   0   5   1  197.50    4.42
   0   5   1  198.12    4.35
  -1  -5  -1  117.99    2.62
  -1  -5  -1  119.09    2.42
  -1  -5  -1  115.83    2.63
   1   5   1  120.08    2.59
   1   5   1  115.56    2.66
  -2  -5  -1    1.55    0.21
  -2  -5  -1    1.60    0.17
   2   5   1    1.40    0.20
  -3  -5  -1    2.37    0.20
  -3  -5  -1    2.81    0.27
  -3  -5  -1    2.74    0.18
   3   5   1    3.08    0.25
  -4  -5  -1   29.47    0.83
  -4  -5  -1   29.00    0.72
  -4  -5  -1   28.69    0.73
   4   5   1   29.05    0.81
   4   5   1   29.86    0.65
  -5  -5  -1   61.18    1.43
  -5  -5  -1   63.05    1.42
  -5  -5  -1   63.72    1.56
   5   5   1   62.12    1.36
   5   5   1   62.62    1.55
  -6  -5  -1   27.33    0.66
  -6  -5  -1   26.38    0.81
  -6  -5  -1   26.17    0.66
   6   5   1   26.30    0.81
   6   5   1   25.36    0.65
  -7  -5  -1    0.07    0.11
  -7  -5  -1    0.10    0.11
  -7  -5  -1    0.41    0.26
   7   5   1    0.11    0.15
   7   5   1    0.25    0.22
  -8  -5  -1    2.95    0.38
  -8  -5  -1    3.10    0.20
   8   5   1    3.45    0.38
   8   5   1    3.86    0.28
  -9  -5  -1    9.37    0.51
  -9  -5  -1    8.90    0.32
   9   5   1    9.11    0.41
   9   5   1    9.69    0.53
 -10  -5  -1    8.13    0.31
 -10  -5  -1    8.17    0.53
  10   5   1    8.22    0.42
  10   5   1    8.00    0.51
 -11  -5  -1    5.00    0.27
 -11  -5  -1    5.71    0.52
  11   5   1    6.14    0.49
 -12  -5  -1    0.41    0.17
  12   5   1    0.72    0.37
 -13  -5  -1    0.59    0.17
  13   5   1    0.40    0.37
  12  -6  -1    0.68    0.38
 -12   6   1    1.03    0.30
  11  -6  -1    0.70    0.34
 -11   6   1    0.72    0.28
 -11   6   1    0.90    0.39
  10  -6  -1   -0.12    0.28
 -10   6   1   -0.40    0.31
 -10   6   1    0.43    0.25
   9  -6  -1    4.56    0.45
  -9   6   1    4.10    0.44
  -9   6   1    4.32    0.38
   8  -6  -1    9.72    0.52
  -8   6   1    9.22    0.51
  -8   6   1    9.14    0.47
   7  -6  -1   24.32    0.83
  -7   6   1   26.19    0.86
  -7   6   1   27.19    0.82
   6  -6  -1   14.88    0.58
   6  -6  -1   14.45    0.49
  -6   6   1   14.47    0.59
  -6   6   1   14.33    0.54
   5  -6  -1    0.96    0.20
   5  -6  -1    0.32    0.20
  -5   6   1    0.27    0.25
  -5   6   1    0.73    0.20
   4  -6  -1   35.78    0.93
   4  -6  -1   34.58    0.91
  -4   6   1   35.08    0.95
  -4   6   1   36.16    0.98
   3  -6  -1   79.60    1.85
   3  -6  -1   78.87    1.78
   3  -6  -1   79.68    1.86
  -3   6   1   80.75    1.86
  -3   6   1   77.73    1.89
   2  -6  -1   72.31    1.60
   2  -6  -1   71.77    1.68
   2  -6  -1   71.02    1.69
  -2   6   1   71.67    1.71
  -2   6   1   71.33    1.68
   1  -6  -1   73.22    1.60
   1  -6  -1   73.95    1.73
   1  -6  -1   71.53    1.71
  -1   6   1   73.98    1.71
  -1   6   1   75.21    1.76
   0  -6  -1   -0.12    0.13
   0  -6  -1   -0.04    0.17
   0  -6  -1   -0.16    0.10
   0   6   1   -0.22    0.13
   0   6   1    0.16    0.19
  -1  -6  -1   65.95    1.35
  -1  -6  -1   61.81    1.53
  -1  -6  -1   62.72    1.54
   1   6   1   67.23    1.50
   1   6   1   65.61    1.57
  -2  -6  -1  110.68    2.42
  -2  -6  -1  101.97    2.44
   2   6   1  107.13    2.46
  -3  -6  -1  108.05    2.40
  -3  -6  -1  104.37    2.45
   3   6   1  105.18    2.46
  -4  -6  -1   23.15    0.60
  -4  -6  -1   21.76    0.62
  -4  -6  -1   22.59    0.71
   4   6   1   21.87    0.71
  -5  -6  -1    9.69    0.33
  -5  -6  -1    9.57    0.26
  -5  -6  -1    8.85    0.34
  -5  -6  -1    8.40    0.44
   5   6   1    8.61    0.42
  -6  -6  -1    4.54    0.25
  -6  -6  -1    4.65    0.24
  -6  -6  -1    4.82    0.38
   6   6   1    4.90    0.22
   6   6   1    4.49    0.34
  -7  -6  -1   12.12    0.38
  -7  -6  -1   11.46    0.55
  -7  -6  -1   11.63    0.39
   7   6   1   11.55    0.52
   7   6   1   11.20    0.38
  -8  -6  -1    6.21    0.29
  -8  -6  -1    6.45    0.28
  -8  -6  -1    6.50    0.49
   8   6   1    6.60    0.32
   8   6   1    6.98    0.44
  -9  -6  -1    1.07    0.34
  -9  -6  -1    1.00    0.17
   9   6   1    0.93    0.30
 -10  -6  -1    0.55    0.16
 -10  -6  -1    0.39    0.35
  10   6   1    0.38    0.31
 -11  -6  -1    2.31    0.43
 -11  -6  -1    1.71    0.21
  11   6   1    2.49    0.41
 -12  -6  -1    3.64    0.51
 -12  -6  -1    3.56    0.26
  12   6   1    3.70    0.48
 -13  -6  -1    0.65    0.19
  13   6   1    0.67    0.39
  11  -7  -1    1.83    0.41
 -11   7   1    1.42    0.34
 -11   7   1    2.59    0.47
  10  -7  -1    3.23    0.45
 -10   7   1    4.07    0.43
 -10   7   1    4.93    0.52
   9  -7  -1    2.52    0.39
  -9   7   1    3.17    0.44
  -9   7   1    2.63    0.35
   8  -7  -1    0.62    0.28
  -8   7   1    0.78    0.25
  -8   7   1    0.83    0.33
   7  -7  -1    4.50    0.37
  -7   7   1    4.66    0.41
  -7   7   1    4.82    0.37
   6  -7  -1   25.13    0.71
   6  -7  -1   23.20    0.78
  -6   7   1   24.28    0.82
  -6   7   1   24.04    0.79
   5  -7  -1   48.05    1.21
   5  -7  -1   49.49    1.26
  -5   7   1   47.98    1.27
  -5   7   1   47.61    1.31
   4  -7  -1   14.90    0.53
   4  -7  -1   14.74    0.51
  -4   7   1   14.77    0.56
  -4   7   1   15.15    0.53
   3  -7  -1    2.82    0.26
   3  -7  -1    2.96    0.27
   3  -7  -1    2.53    0.24
  -3   7   1    2.45    0.29
  -3   7   1    2.56    0.25
   2  -7  -1   -0.14    0.17
   2  -7  -1   -0.15    0.14
   2  -7  -1    0.23    0.19
  -2   7   1    0.08    0.21
  -2   7   1    0.14    0.16
   1  -7  -1   18.04    0.59
   1  -7  -1   18.10    0.50
   1  -7  -1   18.35    0.60
  -1   7   1   18.49    0.62
  -1   7   1   18.12    0.57
   0  -7  -1   91.57    1.96
   0  -7  -1   92.27    2.15
   0  -7  -1   91.98    2.16
   0   7   1   93.09    2.12
   0   7   1   92.39    2.19
  -1  -7  -1   50.24    1.03
  -1  -7  -1   47.62    1.22
  -1  -7  -1   45.35    1.21
   1   7   1   46.92    1.24
   1   7   1   49.76    1.18
  -2  -7  -1   10.25    0.42
  -2  -7  -1   10.03    0.44
   2   7   1    9.89    0.37
   2   7   1   10.41    0.45
  -3  -7  -1   23.53    0.74
  -3  -7  -1   24.56    0.70
   3   7   1   24.64    0.75
  -4  -7  -1   28.60    0.87
  -4  -7  -1   27.61    0.78
  -4  -7  -1   29.88    0.77
   4   7   1   27.94    0.85
  -5  -7  -1   19.21    0.60
  -5  -7  -1   21.38    0.59
  -5  -7  -1   19.60    0.70
   5   7   1   19.65    0.70
  -6  -7  -1    1.89    0.34
  -6  -7  -1    2.06    0.22
   6   7   1    1.59    0.31
  -7  -7  -1    2.67    0.24
  -7  -7  -1    2.45    0.38
   7   7   1    2.82    0.35
  -8  -7  -1    3.78    0.26
  -8  -7  -1    4.53    0.46
   8   7   1    3.26    0.39
  -9  -7  -1    6.92    0.34
  -9  -7  -1    8.14    0.52
   9   7   1    6.98    0.50
 -10  -7  -1    2.67    0.42
 -10  -7  -1    2.97    0.25
  10   7   1    3.14    0.43
 -11  -7  -1    1.04    0.20
 -11  -7  -1    1.34    0.42
  11   7   1    1.53    0.38
 -12  -7  -1   -0.34    0.38
 -12  -7  -1   -0.08    0.18
  12   7   1    0.16    0.35
 -13  -7  -1    1.52    0.23
  13   7   1    1.40    0.44
  11  -8  -1   -0.18    0.32
 -11   8   1   -0.30    0.28
 -11   8   1   -0.32    0.36
  10  -8  -1    1.36    0.38
 -10   8   1    1.32    0.41
 -10   8   1    1.53    0.34
   9  -8  -1    2.20    0.40
  -9   8   1    2.35    0.42
  -9   8   1    2.06    0.36
   8  -8  -1    6.34    0.48
  -8   8   1    7.54    0.50
  -8   8   1    7.89    0.53
   7  -8  -1   10.08    0.53
  -7   8   1   10.55    0.54
  -7   8   1   10.50    0.58
   6  -8  -1    3.26    0.34
  -6   8   1    2.40    0.32
  -6   8   1    3.36    0.40
   5  -8  -1    0.65    0.24
   5  -8  -1    0.78    0.23
  -5   8   1    0.56    0.23
  -5   8   1    0.58    0.29
   4  -8  -1   38.53    1.04
   4  -8  -1   40.01    1.05
  -4   8   1   38.19    1.12
  -4   8   1   39.78    1.10
   3  -8  -1   32.10    0.85
   3  -8  -1   31.90    0.89
  -3   8   1   31.60    0.96
  -3   8   1   31.52    0.92
   2  -8  -1    1.76    0.25
   2  -8  -1    1.96    0.21
   2  -8  -1    1.59    0.26
  -2   8   1    1.75    0.23
  -2   8   1    1.31    0.27
   1  -8  -1    0.99    0.21
   1  -8  -1    1.14    0.23
   1  -8  -1    0.97    0.17
  -1   8   1    0.67    0.19
  -1   8   1    0.88    0.25
   0  -8  -1    5.96    0.36
   0  -8  -1    6.36    0.35
   0  -8  -1    5.80    0.23
   0   8   1    5.90    0.32
   0   8   1    6.18    0.40
  -1  -8  -1   25.72    0.78
  -1  -8  -1   26.84    0.60
  -1  -8  -1   25.69    0.78
   1   8   1   26.67    0.74
   1   8   1   25.44    0.80
  -2  -8  -1   50.45    1.32
  -2  -8  -1   50.04    1.31
   2   8   1   52.23    1.25
   2   8   1   50.56    1.35
  -3  -8  -1   16.76    0.57
  -3  -8  -1   17.31    0.63
   3   8   1   17.19    0.64
  -4  -8  -1    0.70    0.27
  -4  -8  -1    0.86    0.20
   4   8   1    0.49    0.24
  -5  -8  -1    8.83    0.50
  -5  -8  -1    8.06    0.38
   5   8   1    8.20    0.45
  -6  -8  -1   26.46    0.79
  -6  -8  -1   28.26    0.93
   6   8   1   27.37    0.90
  -7  -8  -1    8.92    0.54
  -7  -8  -1    8.81    0.41
   7   8   1    8.67    0.53
  -8  -8  -1    4.76    0.31
  -8  -8  -1    5.27    0.51
   8   8   1    4.50    0.46
  -9  -8  -1    0.43    0.34
  -9  -8  -1    0.11    0.17
   9   8   1    0.14    0.28
 -10  -8  -1    1.11    0.41
 -10  -8  -1    1.17    0.22
  10   8   1    0.92    0.34
 -11  -8  -1    1.66    0.26
 -11  -8  -1    1.34    0.45
  11   8   1    2.05    0.43
 -12  -8  -1    2.47    0.28
 -12  -8  -1    3.51    0.53
  12   8   1    3.01    0.47
 -13  -8  -1    0.00    0.20
  13   8   1    0.29    0.36
  10  -9  -1    1.58    0.39
 -10   9   1    1.59    0.46
 -10   9   1    1.39    0.36
   9  -9  -1   -0.06    0.29
  -9   9   1    0.05    0.37
  -9   9   1   -0.09    0.28
   8  -9  -1    0.02    0.29
  -8   9   1   -0.23    0.33
  -8   9   1    0.09    0.29
   7  -9  -1    5.47    0.46
  -7   9   1    6.57    0.51
  -7   9   1    6.21    0.47
   6  -9  -1   14.42    0.62
  -6   9   1   15.91    0.71
  -6   9   1   15.94    0.67
   5  -9  -1   17.05    0.61
   5  -9  -1   17.58    0.65
  -5   9   1   17.42    0.72
  -5   9   1   16.86    0.68
   4  -9  -1    5.82    0.37
   4  -9  -1    5.50    0.34
  -4   9   1    5.62    0.40
  -4   9   1    5.10    0.40
   3  -9  -1    7.90    0.39
   3  -9  -1    8.08    0.42
  -3   9   1    7.71    0.42
  -3   9   1    8.18    0.50
   2  -9  -1   19.74    0.67
   2  -9  -1   20.78    0.70
   2  -9  -1   19.14    0.59
  -2   9   1   19.39    0.67
  -2   9   1   20.00    0.74
   1  -9  -1    9.22    0.44
   1  -9  -1    9.54    0.35
   1  -9  -1   10.01    0.47
  -1   9   1    9.54    0.45
  -1   9   1    9.74    0.49
   0  -9  -1    7.33    0.41
   0  -9  -1    7.53    0.28
   0  -9  -1    8.30    0.44
   0   9   1    7.64    0.37
   0   9   1    6.80    0.43
  -1  -9  -1    3.84    0.17
  -1  -9  -1    3.23    0.32
  -1  -9  -1    3.81    0.34
   1   9   1    4.06    0.35
   1   9   1    4.25    0.31
  -2  -9  -1    6.65    0.39
  -2  -9  -1    6.86    0.42
   2   9   1    6.74    0.44
  -3  -9  -1   28.46    0.86
  -3  -9  -1   28.28    0.90
   3   9   1   27.49    0.89
  -4  -9  -1   34.45    1.06
  -4  -9  -1   35.43    0.99
   4   9   1   33.29    1.04
  -5  -9  -1   19.74    0.67
  -5  -9  -1   19.72    0.76
   5   9   1   18.95    0.75
  -6  -9  -1    0.93    0.23
  -6  -9  -1    1.43    0.36
   6   9   1    0.30    0.29
  -7  -9  -1    6.31    0.37
  -7  -9  -1    6.82    0.53
   7   9   1    6.95    0.51
  -8  -9  -1    7.65    0.40
  -8  -9  -1    8.09    0.57
   8   9   1    6.90    0.50
  -9  -9  -1    5.11    0.35
  -9  -9  -1    5.91    0.54
   9   9   1    6.01    0.51
 -10  -9  -1    1.33    0.45
 -10  -9  -1    1.09    0.24
  10   9   1    1.11    0.39
 -11  -9  -1    1.13    0.24
 -11  -9  -1    1.10    0.43
  11   9   1    1.09    0.38
 -12  -9  -1    0.10    0.42
 -12  -9  -1    0.08    0.22
  12   9   1    0.27    0.38
  10 -10  -1    1.48    0.42
 -10  10   1    1.39    0.45
 -10  10   1    1.73    0.41
   9 -10  -1    2.86    0.44
  -9  10   1    2.70    0.51
  -9  10   1    3.13    0.45
   8 -10  -1    1.77    0.38
  -8  10   1    2.00    0.45
  -8  10   1    2.14    0.38
   7 -10  -1    2.10    0.35
  -7  10   1    1.26    0.33
  -7  10   1    1.06    0.39
   6 -10  -1    0.21    0.25
  -6  10   1   -0.41    0.25
  -6  10   1    0.00    0.32
   5 -10  -1    8.10    0.44
  -5  10   1    7.61    0.50
  -5  10   1    7.50    0.54
   4 -10  -1   24.11    0.78
   4 -10  -1   23.35    0.77
  -4  10   1   23.90    0.89
  -4  10   1   23.30    0.82
   3 -10  -1   24.31    0.78
   3 -10  -1   23.16    0.72
  -3  10   1   23.66    0.80
  -3  10   1   23.22    0.87
   2 -10  -1    3.04    0.26
   2 -10  -1    2.95    0.33
  -2  10   1    2.38    0.31
  -2  10   1    2.57    0.38
   1 -10  -1    7.86    0.44
   1 -10  -1    8.22    0.48
   1 -10  -1    7.71    0.33
  -1  10   1    8.13    0.45
  -1  10   1    7.82    0.48
   0 -10  -1   11.99    0.55
   0 -10  -1   12.65    0.39
   0 -10  -1   12.86    0.56
   0  10   1   12.49    0.51
   0  10   1   11.10    0.57
  -1 -10  -1   17.57    0.67
  -1 -10  -1   17.01    0.66
   1  10   1   18.01    0.73
  -2 -10  -1   20.19    0.73
  -2 -10  -1   19.60    0.72
   2  10   1   19.31    0.74
  -3 -10  -1    4.18    0.38
  -3 -10  -1    5.16    0.39
   3  10   1    3.97    0.41
  -4 -10  -1    0.29    0.30
  -4 -10  -1   -0.10    0.20
   4  10   1   -0.10    0.28
  -5 -10  -1   17.05    0.73
  -5 -10  -1   15.18    0.63
   5  10   1   15.79    0.68
  -6 -10  -1   26.27    0.94
  -6 -10  -1   23.97    0.81
   6  10   1   24.51    0.89
  -7 -10  -1    9.27    0.48
  -7 -10  -1   10.19    0.62
   7  10   1    9.21    0.55
  -8 -10  -1    0.99    0.39
  -8 -10  -1    0.83    0.26
   8  10   1    1.10    0.37
  -9 -10  -1    0.95    0.25
  -9 -10  -1    0.23    0.38
   9  10   1    1.19    0.39
 -10 -10  -1    0.51    0.24
 -10 -10  -1    0.67    0.41
  10  10   1   -0.22    0.34
 -11 -10  -1    1.10    0.27
 -11 -10  -1    1.36    0.45
  11  10   1    1.05    0.40
 -12 -10  -1    0.75    0.44
 -12 -10  -1    1.04    0.25
  12  10   1    1.03    0.43
   9 -11  -1    0.07    0.31
  -9  11   1    0.09    0.33
  -9  11   1   -0.12    0.41
   8 -11  -1    1.70    0.38
  -8  11   1    1.40    0.38
  -8  11   1    1.79    0.46
   7 -11  -1    3.27    0.44
  -7  11   1    3.13    0.45
  -7  11   1    3.16    0.49
   6 -11  -1    6.46    0.48
  -6  11   1    6.00    0.51
  -6  11   1    6.10    0.56
   5 -11  -1    4.53    0.39
  -5  11   1    3.77    0.47
  -5  11   1    4.25    0.44
   4 -11  -1    0.12    0.22
   4 -11  -1    0.16    0.24
  -4  11   1    0.32    0.33
  -4  11   1    0.36    0.26
   3 -11  -1    8.08    0.41
   3 -11  -1    8.13    0.46
  -3  11   1    7.40    0.51
  -3  11   1    8.36    0.49
   2 -11  -1   22.71    0.79
   2 -11  -1   22.84    0.69
  -2  11   1   23.23    0.90
  -2  11   1   22.80    0.81
   1 -11  -1   23.56    0.86
   1 -11  -1   25.17    0.69
   1 -11  -1   25.60    0.85
  -1  11   1   23.95    0.90
   0 -11  -1    6.30    0.44
   0 -11  -1    6.43    0.45
   0  11   1    6.17    0.47
  -1 -11  -1   -0.13    0.22
  -1 -11  -1    0.29    0.30
   1  11   1    0.14    0.30
  -2 -11  -1   -0.01    0.30
  -2 -11  -1    0.20    0.23
   2  11   1    0.38    0.29
  -3 -11  -1    5.37    0.41
  -3 -11  -1    6.86    0.49
   3  11   1    5.85    0.49
  -4 -11  -1    9.37    0.52
  -4 -11  -1   10.48    0.58
   4  11   1    8.81    0.53
  -5 -11  -1    3.03    0.36
  -5 -11  -1    3.08    0.43
   5  11   1    2.84    0.43
  -6 -11  -1    0.27    0.24
  -6 -11  -1    0.38    0.35
   6  11   1    0.11    0.30
  -7 -11  -1    6.10    0.55
  -7 -11  -1    4.80    0.41
   7  11   1    4.34    0.50
  -8 -11  -1    7.95    0.61
  -8 -11  -1    6.17    0.44
   8  11   1    6.91    0.56
  -9 -11  -1    1.13    0.43
  -9 -11  -1    1.46    0.29
   9  11   1    1.36    0.41
 -10 -11  -1    0.13    0.24
 -10 -11  -1    0.18    0.40
  10  11   1   -0.16    0.34
 -11 -11  -1    0.11    0.44
 -11 -11  -1   -0.20    0.23
  11  11   1    0.13    0.38
   8 -12  -1    1.35    0.38
  -8  12   1    1.15    0.38
  -8  12   1    0.61    0.44
   7 -12  -1   -0.27    0.26
  -7  12   1   -0.35    0.30
  -7  12   1   -0.27    0.37
   6 -12  -1    1.11    0.33
  -6  12   1    0.27    0.33
  -6  12   1    0.47    0.39
   5 -12  -1    3.64    0.40
  -5  12   1    2.56    0.46
  -5  12   1    2.87    0.43
   4 -12  -1   10.53    0.52
  -4  12   1   10.48    0.62
  -4  12   1    9.96    0.65
   3 -12  -1    3.11    0.38
   3 -12  -1    2.77    0.32
  -3  12   1    1.92    0.42
   2 -12  -1    0.12    0.28
  -2  12   1   -0.29    0.30
   1 -12  -1    4.08    0.42
  -1  12   1    3.09    0.44
   0 -12  -1   15.52    0.68
   0 -12  -1   15.77    0.70
   0  12   1   14.79    0.72
  -1 -12  -1    7.62    0.52
  -1 -12  -1    9.12    0.55
   1  12   1    7.64    0.54
  -2 -12  -1    1.50    0.36
  -2 -12  -1    2.26    0.36
   2  12   1    1.16    0.38
  -3 -12  -1    0.02    0.33
  -3 -12  -1    0.21    0.26
   3  12   1    0.26    0.31
  -4 -12  -1    1.58    0.33
  -4 -12  -1    2.09    0.39
   4  12   1    1.49    0.36
  -5 -12  -1    7.30    0.56
  -5 -12  -1    7.75    0.50
   5  12   1    6.73    0.52
  -6 -12  -1    8.10    0.50
  -6 -12  -1    9.14    0.64
   6  12   1    7.69    0.55
  -7 -12  -1    2.47    0.35
  -7 -12  -1    3.22    0.49
   7  12   1    2.54    0.44
  -8 -12  -1   -0.21    0.37
  -8 -12  -1   -0.28    0.24
   8  12   1   -0.40    0.35
  -9 -12  -1    1.52    0.48
  -9 -12  -1    1.14    0.30
   9  12   1    1.53    0.43
 -10 -12  -1    0.55    0.29
 -10 -12  -1    0.18    0.43
  10  12   1    0.74    0.40
 -11 -12  -1    0.00    0.26
 -11 -12  -1    0.22    0.43
  11  12   1    0.36    0.39
   7 -13  -1    1.66    0.39
  -7  13   1    1.42    0.47
  -7  13   1    1.25    0.42
   6 -13  -1    0.80    0.32
  -6  13   1    0.96    0.43
  -5  13   1   -0.12    0.33
  -4  13   1    1.26    0.43
   3 -13  -1   10.17    0.58
  -3  13   1    8.73    0.67
   2 -13  -1    7.24    0.52
  -2  13   1    6.22    0.62
   1 -13  -1    3.76    0.43
  -1  13   1    3.76    0.51
   0 -13  -1   -0.29    0.30
   0  13   1    0.10    0.34
  -1 -13  -1    3.35    0.45
  -1 -13  -1    3.12    0.41
   1  13   1    3.37    0.48
  -2 -13  -1    7.64    0.58
  -2 -13  -1    6.44    0.52
   2  13   1    6.56    0.53
  -3 -13  -1    6.88    0.54
  -3 -13  -1    6.77    0.53
   3  13   1    4.44    0.51
  -4 -13  -1    3.46    0.43
  -4 -13  -1    3.70    0.48
   4  13   1    4.12    0.50
  -5 -13  -1    1.27    0.33
  -5 -13  -1    1.70    0.42
   5  13   1    0.86    0.38
  -6 -13  -1    0.16    0.28
  -6 -13  -1    0.57    0.39
   6  13   1    0.29    0.36
  -7 -13  -1    1.63    0.34
  -7 -13  -1    1.70    0.45
   7  13   1    1.81    0.44
  -8 -13  -1    1.83    0.34
  -8 -13  -1    1.98    0.48
   8  13   1    2.35    0.47
  -9 -13  -1    0.38    0.28
  -9 -13  -1   -0.57    0.40
   9  13   1   -0.37    0.36
 -10 -13  -1    0.14    0.28
 -10 -13  -1   -0.09    0.43
  10  13   1   -0.04    0.38
  -6  14   1    1.26    0.49
  -5  14   1    2.23    0.53
  -4  14   1    1.99    0.49
  -3  14   1    0.07    0.39
   2 -14  -1    1.42    0.37
  -2  14   1    0.51    0.40
   1 -14  -1    5.54    0.48
  -1  14   1    5.11    0.58
   0 -14  -1    4.28    0.48
   0  14   1    4.17    0.55
  -1 -14  -1    3.86    0.48
   1  14   1    2.61    0.48
  -2 -14  -1   -0.42    0.27
  -2 -14  -1   -0.21    0.33
   2  14   1   -0.28    0.37
  -3 -14  -1    1.39    0.43
  -3 -14  -1    1.66    0.39
   3  14   1    1.36    0.43
  -4 -14  -1    1.78    0.39
  -4 -14  -1    2.37    0.46
   4  14   1    1.40    0.42
  -5 -14  -1    3.65    0.45
  -5 -14  -1    3.27    0.51
   5  14   1    3.44    0.51
  -6 -14  -1    2.59    0.48
  -6 -14  -1    2.52    0.40
   6  14   1    2.33    0.46
  -7 -14  -1   -0.09    0.38
  -7 -14  -1    0.23    0.30
   7  14   1   -0.47    0.36
  -8 -14  -1    0.39    0.44
  -8 -14  -1    0.03    0.28
   8  14   1   -0.33    0.37
  -9 -14  -1    1.25    0.35
  -9 -14  -1    1.72    0.50
   9  14   1    0.96    0.44
  -4  15   1    0.81    0.47
  -3  15   1    3.02    0.56
  -2  15   1    3.21    0.55
   1 -15  -1    0.22    0.35
  -1  15   1    0.56    0.41
   0 -15  -1    0.82    0.36
   0  15   1    0.81    0.42
  -1 -15  -1    2.37    0.47
   1  15   1    0.93    0.43
  -2 -15  -1    3.95    0.54
   2  15   1    4.99    0.59
  -3 -15  -1    2.09    0.47
  -3 -15  -1    1.58    0.41
   3  15   1    2.04    0.47
  -4 -15  -1    0.14    0.42
  -4 -15  -1    0.70    0.35
   4  15   1    0.44    0.39
  -5 -15  -1    0.06    0.31
  -5 -15  -1   -0.37    0.38
   5  15   1   -0.10    0.35
  -6 -15  -1    1.03    0.45
  -6 -15  -1    0.25    0.33
   6  15   1    0.36    0.41
  -7 -15  -1    2.06    0.41
  -7 -15  -1    1.73    0.49
   7  15   1    1.50    0.47
  -8 -15  -1    0.87    0.47
  -8 -15  -1    0.92    0.36
  -2  16   1    0.72    0.42
  -1  16   1    2.65    0.56
   0 -16  -1    2.79    0.48
   0  16   1    1.69    0.49
  -1 -16  -1   -0.04    0.35
   1  16   1   -0.21    0.41
  -2 -16  -1    0.16    0.38
   2  16   1    0.20    0.41
  -3 -16  -1    1.28    0.47
   3  16   1    0.66    0.42
  -4 -16  -1    1.63    0.47
  -4 -16  -1    0.60    0.39
   4  16   1    1.38    0.45
  -5 -16  -1    0.77    0.47
  -5 -16  -1    1.83    0.44
   5  16   1    0.99    0.44
  -6 -16  -1   -0.08    0.42
  -6 -16  -1    0.44    0.35
   6  16   1   -0.33    0.38
   4  15  -2    2.01    0.47
  -4 -15   2    2.28    0.52
  -4 -15   2    1.82    0.45
   3  15  -2    0.11    0.39
  -3 -15   2    0.49    0.42
   2  15  -2   -0.55    0.39
  -2 -15   2    0.53    0.41
   1  15  -2    0.07    0.42
  -1 -15   2    0.63    0.41
   0  15  -2    1.38    0.49
  -1  15  -2    1.26    0.50
   7  14  -2    1.32    0.45
  -7 -14   2    1.73    0.51
  -7 -14   2    1.46    0.40
   6  14  -2    1.02    0.44
  -6 -14   2    1.37    0.47
  -6 -14   2    0.43    0.35
   5  14  -2   -0.42    0.37
  -5 -14   2    0.28    0.34
  -5 -14   2    0.23    0.44
   4  14  -2    0.54    0.42
  -4 -14   2    0.58    0.42
  -4 -14   2    0.64    0.34
   3  14  -2    3.25    0.53
  -3 -14   2    2.45    0.44
  -3 -14   2    3.44    0.52
   2  14  -2    2.43    0.51
  -2 -14   2    2.87    0.49
   1  14  -2    1.29    0.46
  -1 -14   2    1.35    0.42
   0  14  -2   -0.59    0.36
   0 -14   2   -0.67    0.36
  -1  14  -2   -0.10    0.38
  -2  14  -2    1.59    0.47
  -3  14  -2    2.15    0.55
  -4  14  -2    0.22    0.47
   8  13  -2   -0.08    0.38
  -8 -13   2   -0.05    0.29
  -8 -13   2    0.19    0.44
   7  13  -2    0.18    0.38
  -7 -13   2    0.21    0.32
  -7 -13   2   -0.28    0.41
   6  13  -2    1.70    0.44
  -6 -13   2    1.85    0.39
  -6 -13   2    1.04    0.47
   5  13  -2    2.69    0.48
  -5 -13   2    3.52    0.52
  -5 -13   2    2.80    0.43
   4  13  -2    2.60    0.47
  -4 -13   2    2.25    0.47
  -4 -13   2    2.88    0.45
   3  13  -2   -0.08    0.35
  -3 -13   2    0.25    0.31
  -3 -13   2   -0.49    0.36
   2  13  -2    0.34    0.40
  -2 -13   2    0.51    0.36
  -2 -13   2    0.67    0.34
   1  13  -2    3.06    0.52
  -1 -13   2    3.94    0.49
   0  13  -2    3.27    0.54
   0 -13   2    3.37    0.46
  -1  13  -2    0.80    0.43
  -2  13  -2   -0.03    0.37
  -3  13  -2    1.61    0.47
  -4  13  -2    0.61    0.44
  -5  13  -2    1.71    0.50
   9  12  -2    0.62    0.39
  -9 -12   2    0.07    0.28
  -9 -12   2    0.42    0.46
   8  12  -2    1.19    0.42
  -8 -12   2    1.13    0.46
  -8 -12   2    0.94    0.32
   7  12  -2    0.71    0.38
  -7 -12   2    1.44    0.49
  -7 -12   2    0.54    0.30
   6  12  -2   -0.18    0.33
  -6 -12   2    0.00    0.27
  -6 -12   2   -0.25    0.38
   5  12  -2    0.15    0.35
  -5 -12   2   -0.09    0.28
  -5 -12   2    0.08    0.37
   4  12  -2    3.88    0.51
  -4 -12   2    4.04    0.44
  -4 -12   2    3.89    0.52
   3  12  -2    4.41    0.51
  -3 -12   2    4.59    0.47
  -3 -12   2    4.42    0.50
   2  12  -2    1.96    0.44
  -2 -12   2    1.72    0.38
  -2 -12   2    2.86    0.43
   1  12  -2    0.21    0.33
  -1 -12   2    0.36    0.32
  -1 -12   2   -0.08    0.26
   0  12  -2    1.61    0.43
   0 -12   2    1.54    0.37
  -1  12  -2    5.25    0.57
   1 -12   2    5.50    0.47
  -2  12  -2    5.29    0.58
  -3  12  -2    2.17    0.47
  -4  12  -2    0.16    0.39
  -5  12  -2    0.17    0.40
  -6  12  -2    1.00    0.42
   6 -12   2    1.04    0.35
  -7  12  -2    2.03    0.53
   7 -12   2    1.65    0.39
  10  11  -2    1.05    0.41
 -10 -11   2    1.07    0.30
 -10 -11   2    0.42    0.50
   9  11  -2    0.27    0.36
  -9 -11   2   -0.30    0.43
  -9 -11   2    0.15    0.26
   8  11  -2    0.01    0.35
  -8 -11   2    0.46    0.28
  -8 -11   2   -0.43    0.39
   7  11  -2    1.15    0.36
  -7 -11   2    1.22    0.44
  -7 -11   2    1.00    0.30
   6  11  -2    2.91    0.45
  -6 -11   2    3.68    0.42
  -6 -11   2    4.07    0.53
   5  11  -2    4.84    0.51
  -5 -11   2    4.43    0.54
  -5 -11   2    4.98    0.45
   4  11  -2    0.51    0.35
  -4 -11   2    0.69    0.36
  -4 -11   2    0.63    0.28
   3  11  -2    1.04    0.36
  -3 -11   2    1.57    0.34
  -3 -11   2    1.61    0.38
   2  11  -2    8.23    0.57
  -2 -11   2    9.31    0.58
  -2 -11   2    8.94    0.56
   1  11  -2   11.63    0.68
  -1 -11   2   11.54    0.60
  -1 -11   2   10.67    0.59
   0  11  -2    7.60    0.59
   0 -11   2    7.10    0.47
   0 -11   2    7.54    0.50
  -1  11  -2    1.31    0.40
   1 -11   2    1.27    0.32
  -2  11  -2    1.19    0.37
   2 -11   2    1.54    0.30
  -3  11  -2    6.40    0.57
   3 -11   2    6.47    0.41
  -4  11  -2    5.76    0.61
   4 -11   2    6.13    0.43
  -5  11  -2    3.02    0.52
  -5  11  -2    2.88    0.42
   5 -11   2    3.49    0.42
  -6  11  -2   -0.12    0.39
  -6  11  -2    0.22    0.32
   6 -11   2    0.23    0.31
  -7  11  -2   -0.05    0.41
  -7  11  -2   -0.64    0.30
   7 -11   2   -0.17    0.28
  -8  11  -2    1.43    0.41
  -8  11  -2    0.79    0.46
   8 -11   2    1.32    0.39
  11  10  -2    0.03    0.35
 -11 -10   2   -0.64    0.41
 -11 -10   2    0.41    0.25
  10  10  -2    1.30    0.40
 -10 -10   2    1.03    0.29
 -10 -10   2    0.44    0.48
   9  10  -2    2.85    0.46
  -9 -10   2    3.67    0.57
  -9 -10   2    2.51    0.35
   8  10  -2    2.42    0.44
  -8 -10   2    2.23    0.34
  -8 -10   2    2.40    0.49
   7  10  -2    1.36    0.37
  -7 -10   2    1.40    0.31
  -7 -10   2    1.58    0.43
   6  10  -2    0.24    0.29
  -6 -10   2    0.33    0.25
  -6 -10   2    0.31    0.35
   5  10  -2    1.04    0.33
  -5 -10   2    1.17    0.39
  -5 -10   2    0.76    0.26
   4  10  -2    8.72    0.56
  -4 -10   2    8.21    0.50
  -4 -10   2    8.49    0.57
   3  10  -2   11.01    0.62
  -3 -10   2   10.83    0.57
  -3 -10   2   10.94    0.60
   2  10  -2    0.86    0.34
  -2 -10   2    1.14    0.34
  -2 -10   2    0.81    0.27
   1  10  -2    2.47    0.42
  -1 -10   2    2.61    0.36
  -1 -10   2    2.74    0.37
   0  10  -2    7.08    0.54
   0 -10   2    6.49    0.45
   0 -10   2    6.64    0.48
  -1  10  -2   14.62    0.71
   1 -10   2   15.52    0.62
   1 -10   2   14.96    0.51
   1 -10   2   14.63    0.65
  -2  10  -2   14.32    0.72
   2 -10   2   13.77    0.53
   2 -10   2   15.43    0.59
  -3  10  -2    0.75    0.36
  -3  10  -2    0.93    0.29
   3 -10   2    0.98    0.24
  -4  10  -2    0.70    0.30
  -4  10  -2   -0.09    0.35
   4 -10   2    0.93    0.26
  -5  10  -2    4.59    0.53
  -5  10  -2    3.80    0.44
   5 -10   2    4.86    0.44
  -6  10  -2    6.87    0.56
  -6  10  -2    7.51    0.54
   6 -10   2    6.65    0.47
  -7  10  -2    2.24    0.41
  -7  10  -2    2.75    0.51
   7 -10   2    2.38    0.40
  -8  10  -2    0.78    0.40
  -8  10  -2    0.64    0.34
   8 -10   2    0.98    0.36
  -9  10  -2   -0.36    0.39
  -9  10  -2   -0.30    0.32
   9 -10   2    0.47    0.35
  11   9  -2    1.72    0.42
 -11  -9   2    1.37    0.29
 -11  -9   2    1.69    0.49
  10   9  -2    0.92    0.37
 -10  -9   2    0.89    0.26
 -10  -9   2    1.73    0.48
   9   9  -2    0.22    0.33
  -9  -9   2    0.17    0.40
  -9  -9   2    0.18    0.23
   8   9  -2    1.43    0.37
  -8  -9   2    1.26    0.28
  -8  -9   2    1.55    0.44
   7   9  -2    2.81    0.41
  -7  -9   2    2.90    0.46
  -7  -9   2    3.28    0.35
   6   9  -2    4.04    0.45
  -6  -9   2    4.53    0.50
  -6  -9   2    3.92    0.37
   5   9  -2    3.78    0.43
  -5  -9   2    3.57    0.36
  -5  -9   2    3.27    0.42
   4   9  -2    0.83    0.33
  -4  -9   2    0.85    0.34
  -4  -9   2    0.62    0.24
   3   9  -2    9.45    0.55
  -3  -9   2    9.02    0.53
  -3  -9   2    7.83    0.45
   2   9  -2   32.09    1.05
  -2  -9   2   29.39    0.96
  -2  -9   2   32.35    0.99
   1   9  -2   22.07    0.84
  -1  -9   2   22.03    0.77
  -1  -9   2   22.17    0.80
   0   9  -2    3.78    0.43
   0  -9   2    4.95    0.42
   0  -9   2    4.53    0.27
   0  -9   2    4.30    0.37
  -1   9  -2   -0.04    0.20
  -1   9  -2   -0.52    0.24
   1  -9   2   -0.19    0.17
   1  -9   2   -0.19    0.22
   1  -9   2    0.13    0.21
  -2   9  -2    7.26    0.43
  -2   9  -2    7.30    0.52
   2  -9   2    7.70    0.41
   2  -9   2    7.92    0.38
  -3   9  -2   25.68    0.86
  -3   9  -2   25.86    0.95
   3  -9   2   26.50    0.78
   3  -9   2   24.84    0.77
  -4   9  -2   12.01    0.58
  -4   9  -2   12.06    0.63
   4  -9   2   13.05    0.55
  -5   9  -2    4.14    0.42
  -5   9  -2    3.53    0.47
   5  -9   2    3.92    0.40
  -6   9  -2   -0.11    0.27
  -6   9  -2   -0.36    0.30
   6  -9   2   -0.12    0.27
  -7   9  -2    2.34    0.47
  -7   9  -2    1.50    0.35
   7  -9   2    2.49    0.38
  -8   9  -2    2.11    0.45
  -8   9  -2    2.00    0.39
   8  -9   2    2.49    0.42
  -9   9  -2    1.52    0.39
  -9   9  -2    2.21    0.48
   9  -9   2    1.66    0.43
 -10   9  -2    0.45    0.34
 -10   9  -2    0.44    0.42
  12   8  -2    0.21    0.36
 -12  -8   2    0.28    0.21
 -12  -8   2   -0.12    0.42
  11   8  -2   -0.07    0.34
 -11  -8   2    0.16    0.21
 -11  -8   2   -0.34    0.40
  10   8  -2    3.74    0.47
 -10  -8   2    4.99    0.60
 -10  -8   2    3.64    0.33
   9   8  -2    3.71    0.45
  -9  -8   2    4.46    0.54
  -9  -8   2    3.41    0.33
   8   8  -2    1.02    0.33
  -8  -8   2    1.29    0.41
  -8  -8   2    1.32    0.26
   7   8  -2    0.17    0.29
  -7  -8   2   -0.76    0.33
  -7  -8   2    0.02    0.20
   6   8  -2    3.70    0.40
  -6  -8   2    4.75    0.50
  -6  -8   2    4.08    0.33
   5   8  -2    7.31    0.45
  -5  -8   2    6.98    0.52
  -5  -8   2    6.46    0.40
   4   8  -2   29.10    0.94
  -4  -8   2   28.97    0.89
  -4  -8   2   29.36    0.97
   3   8  -2   39.56    1.17
  -3  -8   2   41.04    1.18
  -3  -8   2   39.79    1.13
   2   8  -2    4.08    0.40
  -2  -8   2    4.03    0.40
  -2  -8   2    3.37    0.33
   1   8  -2    4.37    0.42
  -1  -8   2    3.93    0.35
  -1  -8   2    3.72    0.22
  -1  -8   2    4.58    0.37
   0   8  -2   16.98    0.69
   0   8  -2   16.45    0.59
   0  -8   2   15.61    0.58
   0  -8   2   15.82    0.48
   0  -8   2   17.05    0.65
  -1   8  -2   10.98    0.48
  -1   8  -2    9.91    0.53
   1  -8   2   11.19    0.42
   1  -8   2   11.34    0.47
   1  -8   2   10.49    0.51
  -2   8  -2    8.19    0.51
  -2   8  -2    7.87    0.42
   2  -8   2    8.24    0.39
   2  -8   2    7.56    0.43
   2  -8   2    8.57    0.40
  -3   8  -2    0.11    0.26
  -3   8  -2   -0.06    0.20
   3  -8   2    0.18    0.19
   3  -8   2   -0.02    0.17
  -4   8  -2    8.62    0.47
  -4   8  -2    8.52    0.51
   4  -8   2    8.70    0.45
  -5   8  -2   12.40    0.65
  -5   8  -2   12.70    0.59
   5  -8   2   11.69    0.53
  -6   8  -2   11.03    0.58
  -6   8  -2   10.76    0.63
   6  -8   2   10.61    0.55
  -7   8  -2    2.97    0.38
  -7   8  -2    3.60    0.48
   7  -8   2    3.58    0.41
  -8   8  -2   -0.45    0.34
  -8   8  -2    0.06    0.26
   8  -8   2   -0.24    0.27
  -9   8  -2    0.63    0.40
  -9   8  -2    0.57    0.31
   9  -8   2    1.27    0.38
 -10   8  -2    0.30    0.40
 -10   8  -2    0.15    0.31
  10  -8   2    0.67    0.37
  12   7  -2    0.41    0.33
 -12  -7   2    1.14    0.47
 -12  -7   2    0.43    0.19
  11   7  -2    2.36    0.41
 -11  -7   2    1.73    0.24
 -11  -7   2    2.42    0.51
  10   7  -2    0.84    0.34
 -10  -7   2    0.38    0.41
 -10  -7   2    0.43    0.21
   9   7  -2    3.34    0.42
  -9  -7   2    2.45    0.27
  -9  -7   2    2.59    0.48
   8   7  -2    4.68    0.44
  -8  -7   2    4.38    0.50
  -8  -7   2    4.01    0.31
   7   7  -2    7.12    0.46
  -7  -7   2    6.25    0.36
  -7  -7   2    6.77    0.54
   6   7  -2    0.50    0.27
  -6  -7   2    0.71    0.21
  -6  -7   2   -0.09    0.32
   5   7  -2   -0.24    0.23
  -5  -7   2   -0.62    0.28
  -5  -7   2    0.16    0.19
   4   7  -2    0.14    0.25
  -4  -7   2   -0.01    0.18
  -4  -7   2   -0.14    0.28
   3   7  -2   23.63    0.79
  -3  -7   2   24.33    0.75
  -3  -7   2   23.82    0.56
  -3  -7   2   23.88    0.80
   2   7  -2   68.78    1.73
  -2  -7   2   67.43    1.46
  -2  -7   2   67.93    1.67
  -2  -7   2   65.22    1.68
   1   7  -2   57.74    1.49
   1   7  -2   56.15    1.37
  -1  -7   2   53.97    1.41
  -1  -7   2   55.17    1.43
  -1  -7   2   56.05    1.25
   0   7  -2    1.60    0.29
   0   7  -2    2.05    0.24
   0  -7   2    1.59    0.26
   0  -7   2    1.74    0.19
   0  -7   2    1.61    0.26
  -1   7  -2    8.91    0.48
  -1   7  -2    9.27    0.42
   1  -7   2    9.77    0.36
   1  -7   2    9.22    0.40
   1  -7   2    9.74    0.46
  -2   7  -2   22.77    0.76
  -2   7  -2   22.43    0.71
   2  -7   2   22.85    0.66
   2  -7   2   21.74    0.65
   2  -7   2   21.95    0.73
  -3   7  -2   22.29    0.74
  -3   7  -2   22.33    0.78
   3  -7   2   22.24    0.65
   3  -7   2   23.13    0.70
  -4   7  -2    8.09    0.50
  -4   7  -2    6.70    0.42
   4  -7   2    6.88    0.39
   4  -7   2    7.70    0.34
  -5   7  -2   -0.48    0.27
  -5   7  -2    0.12    0.21
   5  -7   2    0.01    0.22
  -6   7  -2    3.38    0.41
  -6   7  -2    3.73    0.37
   6  -7   2    3.79    0.38
  -7   7  -2    6.40    0.46
  -7   7  -2    7.68    0.54
   7  -7   2    6.09    0.44
  -8   7  -2    7.52    0.49
  -8   7  -2    8.63    0.58
   8  -7   2    7.66    0.51
  -9   7  -2    1.09    0.40
  -9   7  -2    1.18    0.33
   9  -7   2    1.51    0.37
 -10   7  -2   -0.05    0.37
 -10   7  -2   -0.04    0.27
  10  -7   2   -0.11    0.32
 -11   7  -2   -0.15    0.29
 -11   7  -2   -0.21    0.38
  11  -7   2    0.18    0.35
 -13  -6   2   -0.15    0.43
 -13  -6   2    0.01    0.15
  12   6  -2   -0.01    0.32
 -12  -6   2    0.32    0.42
 -12  -6   2    0.34    0.16
  11   6  -2   -0.11    0.32
 -11  -6   2    0.25    0.16
 -11  -6   2    0.42    0.40
  10   6  -2    7.59    0.50
 -10  -6   2    7.28    0.60
 -10  -6   2    6.06    0.32
   9   6  -2    5.55    0.44
  -9  -6   2    6.18    0.54
  -9  -6   2    5.85    0.30
   8   6  -2   -0.06    0.26
  -8  -6   2   -0.03    0.16
  -8  -6   2   -0.11    0.33
   7   6  -2    7.71    0.45
  -7  -6   2    7.11    0.35
  -7  -6   2    7.09    0.54
   6   6  -2   21.21    0.76
   6   6  -2   20.72    0.72
  -6  -6   2   21.21    0.56
  -6  -6   2   22.10    0.65
  -6  -6   2   21.52    0.81
   5   6  -2   24.30    0.78
  -5  -6   2   23.68    0.70
  -5  -6   2   24.38    0.83
  -5  -6   2   23.62    0.58
   4   6  -2   27.10    0.83
  -4  -6   2   27.25    0.63
  -4  -6   2   28.43    0.87
  -4  -6   2   25.88    0.76
   3   6  -2    8.14    0.41
  -3  -6   2    8.76    0.25
  -3  -6   2    8.22    0.37
  -3  -6   2    7.31    0.43
   2   6  -2   -0.12    0.19
  -2  -6   2   -0.03    0.10
  -2  -6   2    0.00    0.15
  -2  -6   2   -0.27    0.23
   1   6  -2   70.30    1.72
   1   6  -2   69.59    1.63
  -1  -6   2   69.66    1.68
  -1  -6   2   67.85    1.67
  -1  -6   2   69.26    1.51
   0   6  -2  103.76    2.45
   0   6  -2  103.90    2.36
   0  -6   2  105.54    2.38
   0  -6   2  105.17    2.41
   0  -6   2   98.91    2.22
  -1   6  -2   59.84    1.48
  -1   6  -2   61.54    1.55
   1  -6   2   59.89    1.51
   1  -6   2   62.62    1.40
   1  -6   2   61.10    1.46
  -2   6  -2   17.87    0.59
  -2   6  -2   16.88    0.62
   2  -6   2   18.32    0.61
   2  -6   2   17.73    0.55
   2  -6   2   17.16    0.53
  -3   6  -2    4.19    0.33
  -3   6  -2    4.07    0.31
   3  -6   2    3.85    0.29
   3  -6   2    3.90    0.25
   3  -6   2    4.27    0.31
  -4   6  -2    8.77    0.48
  -4   6  -2    8.22    0.43
   4  -6   2    9.53    0.44
   4  -6   2    8.23    0.33
  -5   6  -2   20.79    0.74
  -5   6  -2   20.72    0.70
   5  -6   2   19.17    0.67
  -6   6  -2    8.30    0.44
  -6   6  -2    8.50    0.52
   6  -6   2    8.06    0.46
  -7   6  -2   -0.09    0.23
  -7   6  -2   -0.25    0.27
   7  -6   2   -0.48    0.21
  -8   6  -2    0.57    0.34
  -8   6  -2    0.68    0.27
   8  -6   2    0.86    0.28
  -9   6  -2    6.97    0.55
  -9   6  -2    6.43    0.46
   9  -6   2    6.23    0.51
 -10   6  -2    2.22    0.36
 -10   6  -2    2.85    0.48
  10  -6   2    2.52    0.44
 -11   6  -2    0.01    0.28
 -11   6  -2    0.25    0.39
  11  -6   2    0.13    0.33
 -13  -5   2    1.25    0.47
  12   5  -2    0.98    0.35
 -12  -5   2    0.41    0.14
 -12  -5   2    0.98    0.42
  11   5  -2    1.27    0.34
 -11  -5   2    1.70    0.46
 -11  -5   2    1.11    0.17
  10   5  -2   -0.01    0.29
 -10  -5   2    0.06    0.13
 -10  -5   2    0.13    0.36
   9   5  -2    5.76    0.47
   9   5  -2    6.53    0.46
  -9  -5   2    5.44    0.27
   8   5  -2   23.42    0.85
   8   5  -2   24.13    0.81
  -8  -5   2   24.09    0.65
  -8  -5   2   23.78    0.63
  -8  -5   2   23.98    0.71
   7   5  -2   11.45    0.52
   7   5  -2   10.46    0.55
  -7  -5   2   11.26    0.38
  -7  -5   2   11.57    0.40
  -7  -5   2   11.27    0.42
   6   5  -2   -0.28    0.26
   6   5  -2   -0.17    0.22
  -6  -5   2   -0.26    0.15
  -6  -5   2   -0.14    0.13
  -6  -5   2    0.06    0.15
   5   5  -2    0.04    0.22
   5   5  -2    0.02    0.20
  -5  -5   2    0.29    0.13
  -5  -5   2    0.35    0.15
  -5  -5   2    0.21    0.13
   4   5  -2   25.37    0.77
   4   5  -2   26.75    0.80
  -4  -5   2   25.35    0.61
  -4  -5   2   27.27    0.69
  -4  -5   2   25.52    0.71
   3   5  -2   50.18    1.28
   3   5  -2   49.90    1.28
  -3  -5   2   49.94    1.09
  -3  -5   2   49.88    1.22
   2   5  -2  107.80    2.49
  -2  -5   2  106.54    2.44
  -2  -5   2  108.45    2.48
  -2  -5   2  105.88    2.25
   1   5  -2   94.25    2.06
   1   5  -2   96.15    2.15
  -1  -5   2   88.47    2.09
  -1  -5   2   91.07    2.11
  -1  -5   2   85.18    1.93
   0   5  -2    0.03    0.13
   0   5  -2    0.06    0.17
   0  -5   2    0.27    0.17
   0  -5   2    0.01    0.14
   0  -5   2   -0.11    0.11
  -1   5  -2   52.99    1.28
  -1   5  -2   51.98    1.32
   1  -5   2   52.96    1.26
   1  -5   2   52.49    1.21
   1  -5   2   53.10    1.31
  -2   5  -2  154.54    3.60
  -2   5  -2  161.24    3.55
   2  -5   2  163.34    3.57
   2  -5   2  156.97    3.49
   2  -5   2  159.83    3.40
  -3   5  -2   51.50    1.27
  -3   5  -2   48.81    1.30
   3  -5   2   52.09    1.27
   3  -5   2   51.23    1.23
   3  -5   2   48.64    1.18
  -4   5  -2    3.39    0.31
  -4   5  -2    3.34    0.27
   4  -5   2    3.37    0.20
   4  -5   2    3.22    0.27
  -5   5  -2    0.55    0.26
  -5   5  -2    0.03    0.19
   5  -5   2    0.45    0.21
  -6   5  -2    7.74    0.40
  -6   5  -2    7.54    0.45
   6  -5   2    7.40    0.43
  -7   5  -2    7.32    0.46
  -7   5  -2    7.06    0.42
   7  -5   2    7.34    0.45
  -8   5  -2    5.19    0.42
  -8   5  -2    4.53    0.37
   8  -5   2    4.73    0.44
  -9   5  -2    0.96    0.28
  -9   5  -2    0.79    0.36
   9  -5   2    0.73    0.31
 -10   5  -2    0.51    0.39
 -10   5  -2    1.05    0.30
  10  -5   2    1.92    0.38
 -11   5  -2    2.04    0.44
 -11   5  -2    2.31    0.35
  11  -5   2    2.10    0.40
 -12   5  -2    1.32    0.43
 -12   5  -2    0.91    0.31
  12  -5   2    0.88    0.39
  12   4  -2    1.34    0.35
 -12  -4   2    0.80    0.44
  11   4  -2    3.87    0.42
 -11  -4   2    5.16    0.55
 -11  -4   2    2.86    0.17
  10   4  -2    9.37    0.50
  10   4  -2    8.42    0.52
 -10  -4   2    7.40    0.26
 -10  -4   2    8.40    0.45
 -10  -4   2    7.58    0.27
   9   4  -2    8.21    0.49
   9   4  -2    8.08    0.52
  -9  -4   2    8.54    0.42
  -9  -4   2    7.32    0.27
  -9  -4   2    7.35    0.26
   8   4  -2   -0.54    0.29
   8   4  -2   -0.25    0.24
  -8  -4   2    0.02    0.20
  -8  -4   2   -0.01    0.12
  -8  -4   2    0.12    0.11
   7   4  -2   31.84    0.99
   7   4  -2   32.48    0.95
  -7  -4   2   33.30    0.80
  -7  -4   2   33.94    0.87
  -7  -4   2   33.42    0.79
   6   4  -2   48.04    1.25
   6   4  -2   47.99    1.29
  -6  -4   2   48.27    1.14
  -6  -4   2   48.60    1.10
  -6  -4   2   47.10    1.11
   5   4  -2   42.26    1.08
   5   4  -2   39.91    1.11
  -5  -4   2   40.18    0.98
  -5  -4   2   41.40    0.96
  -5  -4   2   41.72    0.97
   4   4  -2   57.38    1.40
   4   4  -2   55.63    1.43
  -4  -4   2   58.86    1.31
  -4  -4   2   54.70    1.32
  -4  -4   2   58.33    1.26
   3   4  -2   17.62    0.56
   3   4  -2   17.21    0.56
  -3  -4   2   17.79    0.48
  -3  -4   2   17.24    0.44
  -3  -4   2   18.11    0.51
   2   4  -2    6.72    0.33
   2   4  -2    6.57    0.33
  -2  -4   2    6.91    0.22
  -2  -4   2    6.59    0.29
   1   4  -2   58.68    1.40
   1   4  -2   57.83    1.33
  -1  -4   2   58.73    1.24
  -1  -4   2   55.21    1.36
  -1  -4   2   56.78    1.37
   0   4  -2  113.05    2.48
   0   4  -2  109.38    2.53
   0  -4   2  112.12    2.50
   0  -4   2  108.11    2.49
   0  -4   2  113.77    2.36
  -1   4  -2  121.93    2.81
  -1   4  -2  122.47    2.75
   1  -4   2  121.28    2.73
   1  -4   2  127.45    2.78
   1  -4   2  126.42    2.64
  -2   4  -2   13.02    0.45
  -2   4  -2   12.70    0.42
   2  -4   2   12.81    0.37
   2  -4   2   11.76    0.40
   2  -4   2   12.68    0.43
  -3   4  -2   24.57    0.73
  -3   4  -2   24.91    0.71
   3  -4   2   26.24    0.72
   3  -4   2   24.33    0.62
   3  -4   2   25.08    0.69
  -4   4  -2   45.58    1.20
  -4   4  -2   44.43    1.14
   4  -4   2   44.54    1.13
   4  -4   2   45.91    1.03
  -5   4  -2   31.41    0.92
  -5   4  -2   31.66    0.87
   5  -4   2   29.50    0.86
  -6   4  -2    5.82    0.35
  -6   4  -2    5.27    0.38
   6  -4   2    5.50    0.37
  -7   4  -2    0.11    0.28
  -7   4  -2    0.32    0.21
   7  -4   2    0.38    0.24
  -8   4  -2    5.24    0.45
  -8   4  -2    5.07    0.36
   8  -4   2    5.64    0.41
  -9   4  -2    6.39    0.47
  -9   4  -2    6.17    0.42
   9  -4   2    6.54    0.46
 -10   4  -2    2.19    0.32
 -10   4  -2    2.07    0.41
  10  -4   2    2.70    0.40
 -11   4  -2    0.14    0.25
 -11   4  -2    0.28    0.37
  11  -4   2    0.19    0.30
 -12   4  -2    0.22    0.26
 -12   4  -2   -0.01    0.38
  12  -4   2   -0.05    0.31
  12   3  -2    0.61    0.34
 -12  -3   2    0.50    0.40
 -12  -3   2    0.22    0.31
  11   3  -2    0.32    0.29
  11   3  -2    0.10    0.32
  11   3  -2    0.68    0.28
  10   3  -2    1.43    0.32
  10   3  -2    1.44    0.30
  10   3  -2    1.58    0.34
   9   3  -2   12.57    0.58
   9   3  -2   13.15    0.58
   9   3  -2   12.56    0.53
   8   3  -2   37.25    1.05
   8   3  -2   36.61    0.99
   8   3  -2   36.25    1.07
   7   3  -2   41.02    1.16
   7   3  -2   42.98    1.14
   7   3  -2   41.47    1.06
  -7  -3   2   43.69    0.93
   6   3  -2   -0.28    0.22
   6   3  -2   -0.13    0.18
  -6  -3   2    0.06    0.07
  -6  -3   2    0.06    0.08
  -6  -3   2    0.17    0.15
   5   3  -2    1.07    0.24
   5   3  -2    1.16    0.20
  -5  -3   2    1.38    0.18
  -5  -3   2    1.12    0.11
  -5  -3   2    1.35    0.11
   4   3  -2    5.84    0.29
   4   3  -2    6.07    0.34
  -4  -3   2    6.42    0.26
  -4  -3   2    5.96    0.22
  -4  -3   2    6.67    0.22
   3   3  -2   68.44    1.62
   3   3  -2   68.41    1.63
  -3  -3   2   69.01    1.56
  -3  -3   2   71.00    1.54
  -3  -3   2   69.47    1.49
   2   3  -2   35.61    0.89
   2   3  -2   34.83    0.88
  -2  -3   2   35.39    0.83
  -2  -3   2   35.01    0.84
  -2  -3   2   34.17    0.78
   1   3  -2    8.59    0.32
   1   3  -2    8.80    0.33
   1   3  -2    8.68    0.28
  -1  -3   2    9.02    0.26
  -1  -3   2    8.71    0.31
   0   3  -2    2.62    0.21
   0   3  -2    1.83    0.15
   0  -3   2    1.93    0.17
   0  -3   2    2.03    0.17
   0  -3   2    1.93    0.14
  -1   3  -2  127.09    2.78
   1  -3   2  125.83    2.75
   1  -3   2  118.57    2.65
   1  -3   2  132.40    2.80
  -2   3  -2  235.00    5.13
  -2   3  -2  233.96    5.06
   2  -3   2  241.98    5.07
   2  -3   2  225.70    4.87
   2  -3   2  232.13    5.02
  -3   3  -2   26.69    0.71
  -3   3  -2   26.40    0.76
   3  -3   2   27.06    0.71
   3  -3   2   28.21    0.72
   3  -3   2   26.56    0.63
  -4   3  -2    0.56    0.20
  -4   3  -2    0.94    0.18
   4  -3   2    0.96    0.20
  -5   3  -2   19.67    0.61
  -5   3  -2   19.81    0.67
   5  -3   2   19.77    0.63
   5  -3   2   20.18    0.46
  -6   3  -2   16.83    0.58
  -6   3  -2   17.86    0.64
   6  -3   2   17.86    0.62
  -7   3  -2   10.81    0.45
  -7   3  -2   10.60    0.51
   7  -3   2    9.64    0.48
  -8   3  -2    6.14    0.36
  -8   3  -2    5.73    0.43
   8  -3   2    5.31    0.43
  -9   3  -2    0.18    0.31
  -9   3  -2    0.02    0.20
   9  -3   2    0.63    0.27
 -10   3  -2    2.57    0.32
 -10   3  -2    3.54    0.46
  10  -3   2    2.61    0.39
 -11   3  -2    3.71    0.49
 -11   3  -2    3.15    0.35
  11  -3   2    3.84    0.47
 -12   3  -2    1.98    0.31
 -12   3  -2    1.70    0.44
  12  -3   2    1.94    0.39
 -13   3  -2   -0.02    0.39
 -13   3  -2    0.17    0.25
  13   2  -2    0.51    0.30
  12   2  -2    1.07    0.34
 -12  -2   2    1.50    0.43
  11   2  -2    2.39    0.38
  11   2  -2    2.57    0.37
  11   2  -2    2.26    0.37
  10   2  -2    6.15    0.42
  10   2  -2    6.07    0.42
  10   2  -2    5.56    0.42
   9   2  -2   -0.06    0.26
   9   2  -2   -0.45    0.23
   9   2  -2    0.35    0.24
   8   2  -2    3.61    0.35
   8   2  -2    2.85    0.36
   8   2  -2    3.76    0.32
   7   2  -2   51.96    1.37
   7   2  -2   53.30    1.35
   7   2  -2   54.44    1.30
   6   2  -2  108.73    2.56
   6   2  -2  111.83    2.43
   6   2  -2  111.81    2.55
   5   2  -2   10.29    0.36
   5   2  -2    9.48    0.37
   5   2  -2    9.81    0.42
   4   2  -2   13.17    0.48
   4   2  -2   13.45    0.43
  -4  -2   2   14.38    0.34
  -4  -2   2   13.88    0.40
  -4  -2   2   14.50    0.34
   3   2  -2   18.86    0.52
   3   2  -2   18.66    0.56
  -3  -2   2   18.34    0.46
  -3  -2   2   19.28    0.46
  -3  -2   2   19.79    0.49
   2   2  -2   78.37    1.78
   2   2  -2   79.31    1.79
  -2  -2   2   78.35    1.66
  -2  -2   2   76.86    1.72
  -2  -2   2   79.65    1.73
   1   2  -2  244.77    5.26
   1   2  -2  243.00    5.19
   1   2  -2  243.51    5.28
  -1  -2   2  242.74    4.99
  -1  -2   2  241.99    5.22
   0   2  -2   62.70    1.41
   0   2  -2   62.00    1.43
   0   2  -2   61.66    1.40
   0  -2   2   63.34    1.42
   0  -2   2   64.00    1.34
  -1   2  -2   94.30    2.14
  -1   2  -2   93.55    2.17
   1  -2   2  101.27    2.16
   1  -2   2   96.70    2.12
   1  -2   2   99.07    2.06
  -2   2  -2    6.09    0.26
  -2   2  -2    6.24    0.28
   2  -2   2    5.91    0.24
   2  -2   2    6.28    0.19
   2  -2   2    6.43    0.25
  -3   2  -2   70.85    1.67
  -3   2  -2   69.53    1.61
   3  -2   2   70.93    1.58
   3  -2   2   71.07    1.52
  -4   2  -2   67.42    1.55
  -4   2  -2   66.66    1.61
   4  -2   2   65.54    1.53
  -5   2  -2   24.28    0.66
  -5   2  -2   22.86    0.65
  -5   2  -2   22.80    0.72
   5  -2   2   23.30    0.68
  -6   2  -2    1.23    0.19
  -6   2  -2    1.22    0.19
  -6   2  -2    0.93    0.25
   6  -2   2    1.22    0.11
   6  -2   2    1.25    0.24
  -7   2  -2   12.72    0.56
  -7   2  -2   11.76    0.44
   7  -2   2   11.92    0.51
  -8   2  -2   19.16    0.74
  -8   2  -2   18.69    0.62
   8  -2   2   19.37    0.70
  -9   2  -2   19.37    0.65
  -9   2  -2   18.18    0.76
   9  -2   2   18.79    0.72
 -10   2  -2    2.04    0.41
 -10   2  -2    1.74    0.26
  10  -2   2    1.42    0.34
 -11   2  -2   -0.90    0.31
 -11   2  -2    0.24    0.23
  11  -2   2    0.05    0.29
 -12   2  -2    0.20    0.24
 -12   2  -2   -0.22    0.37
  12  -2   2   -0.35    0.27
 -13   2  -2    0.28    0.25
 -13   2  -2    0.35    0.40
  13  -2   2    0.57    0.36
  13   1  -2    1.27    0.38
 -13  -1   2    0.73    0.13
  12   1  -2    0.15    0.29
 -12  -1   2   -0.19    0.34
 -12  -1   2   -0.11    0.11
  11   1  -2   -0.06    0.28
  11   1  -2    0.11    0.29
 -11  -1   2    0.03    0.10
 -11  -1   2   -0.56    0.32
 -11  -1   2    0.01    0.10
  10   1  -2    3.50    0.37
  10   1  -2    3.87    0.39
 -10  -1   2    3.99    0.45
   9   1  -2   16.69    0.64
   9   1  -2   16.28    0.63
   9   1  -2   16.42    0.61
   8   1  -2   33.94    0.95
   8   1  -2   34.00    0.99
   8   1  -2   34.26    0.97
   7   1  -2   18.56    0.62
   7   1  -2   17.61    0.59
   7   1  -2   18.41    0.60
   6   1  -2    8.28    0.38
   6   1  -2    8.26    0.36
   6   1  -2    7.64    0.34
   5   1  -2   44.65    1.07
   5   1  -2   45.75    1.11
   5   1  -2   44.85    1.13
   4   1  -2   34.70    0.90
   4   1  -2   35.11    0.84
   4   1  -2   35.42    0.86
   3   1  -2   16.81    0.45
   3   1  -2   16.92    0.50
  -3  -1   2   18.11    0.46
  -3  -1   2   16.95    0.38
  -3  -1   2   17.04    0.38
   2   1  -2  293.07    6.39
   2   1  -2  288.49    6.48
  -2  -1   2  296.59    6.31
  -2  -1   2  296.51    6.30
  -2  -1   2  308.64    6.15
   1   1  -2    0.15    0.10
   1   1  -2    0.34    0.09
  -1  -1   2    0.38    0.08
  -1  -1   2    0.41    0.08
  -1  -1   2    0.29    0.07
   0   1  -2   92.30    2.09
   0   1  -2   94.20    2.07
   0   1  -2   95.75    2.07
   0  -1   2   95.67    2.07
   0  -1   2   96.64    1.98
  -1   1  -2    0.29    0.09
  -1   1  -2    0.37    0.07
  -1   1  -2    0.36    0.10
   1  -1   2    0.35    0.10
   1  -1   2    0.45    0.09
  -2   1  -2  122.80    2.76
  -2   1  -2  124.79    2.71
   2  -1   2  125.16    2.70
   2  -1   2  124.02    2.62
  -3   1  -2    1.41    0.14
  -3   1  -2    1.33    0.19
   3  -1   2    1.21    0.16
  -4   1  -2   70.23    1.55
  -4   1  -2   67.91    1.63
  -4   1  -2   65.67    1.55
   4  -1   2   68.35    1.55
  -5   1  -2   62.39    1.40
  -5   1  -2   59.01    1.40
  -5   1  -2   61.06    1.50
   5  -1   2   58.63    1.42
  -6   1  -2   54.22    1.26
  -6   1  -2   51.23    1.37
  -6   1  -2   52.49    1.26
   6  -1   2   53.02    1.30
  -7   1  -2   10.62    0.49
  -7   1  -2   10.66    0.39
  -7   1  -2   10.30    0.39
   7  -1   2    9.85    0.45
  -8   1  -2    1.48    0.22
  -8   1  -2    1.19    0.31
   8  -1   2    1.91    0.31
  -9   1  -2    3.13    0.29
  -9   1  -2    2.80    0.42
   9  -1   2    3.60    0.39
 -10   1  -2   14.31    0.69
 -10   1  -2   12.79    0.51
  10  -1   2   13.44    0.61
 -11   1  -2    5.29    0.36
 -11   1  -2    5.87    0.52
  11  -1   2    5.22    0.46
 -12   1  -2    0.76    0.24
 -12   1  -2    0.97    0.41
  12  -1   2    0.80    0.35
 -13   1  -2   -0.88    0.35
 -13   1  -2    0.33    0.23
  13  -1   2    0.18    0.33
  13   0  -2    1.44    0.37
 -13   0   2    0.89    0.18
  12   0  -2    2.42    0.40
 -12   0   2    2.03    0.19
 -12   0   2    2.53    0.44
  11   0  -2    4.05    0.44
 -11   0   2    3.56    0.44
 -11   0   2    2.61    0.20
  10   0  -2    1.24    0.31
  10   0  -2    1.48    0.30
 -10   0   2    1.13    0.14
 -10   0   2    1.29    0.14
 -10   0   2    0.59    0.32
   9   0  -2   -0.27    0.23
   9   0  -2   -0.20    0.22
  -9   0   2   -0.01    0.09
  -9   0   2    0.06    0.10
  -9   0   2   -0.12    0.26
   8   0  -2    4.68    0.34
   8   0  -2    4.73    0.35
   8   0  -2    4.05    0.37
   7   0  -2   58.84    1.45
   7   0  -2   60.41    1.47
   7   0  -2   56.85    1.42
   6   0  -2   24.14    0.71
   6   0  -2   24.94    0.70
   6   0  -2   24.39    0.69
   5   0  -2    1.73    0.20
   5   0  -2    1.42    0.22
   5   0  -2    1.63    0.20
   4   0  -2   26.12    0.71
   4   0  -2   26.69    0.68
   4   0  -2   28.19    0.69
   3   0  -2  113.93    2.47
   3   0  -2  108.69    2.49
   3   0  -2  114.84    2.39
   2   0  -2   54.90    1.26
   2   0  -2   54.12    1.22
  -2   0   2   55.79    1.20
  -2   0   2   54.53    1.19
  -2   0   2   55.30    1.19
   1   0  -2  443.27    9.70
   1   0  -2  451.61    9.74
  -1   0   2  449.86    9.30
  -1   0   2  453.04    9.58
  -1   0   2  450.53    9.62
   0   0  -2  209.72    4.51
   0   0  -2  215.60    4.50
   0   0  -2  202.07    4.56
   0   0   2  211.44    4.50
   0   0   2  214.93    4.39
  -1   0  -2   61.14    1.35
  -1   0  -2   60.64    1.40
  -1   0  -2   64.23    1.39
   1   0   2   63.48    1.34
   1   0   2   63.26    1.38
  -2   0  -2  162.54    3.60
  -2   0  -2  163.10    3.54
   2   0   2  167.76    3.42
  -3   0  -2  418.91    8.59
  -3   0  -2  392.14    8.59
  -3   0  -2  399.84    8.73
   3   0   2  403.28    8.30
  -4   0  -2   90.08    1.95
  -4   0  -2   92.77    1.98
  -4   0  -2   87.92    1.98
  -4   0  -2   87.96    2.08
   4   0   2   89.37    1.97
  -5   0  -2    8.68    0.30
  -5   0  -2    9.55    0.30
  -5   0  -2    9.68    0.41
   5   0   2    9.37    0.37
  -6   0  -2    9.93    0.45
  -6   0  -2   10.24    0.34
  -6   0  -2    9.57    0.34
   6   0   2   10.27    0.41
  -7   0  -2   20.98    0.55
  -7   0  -2   19.68    0.70
  -7   0  -2   19.75    0.56
  -7   0  -2   18.03    0.55
   7   0   2   19.44    0.64
  -8   0  -2   26.71    0.72
  -8   0  -2   26.67    0.89
  -8   0  -2   26.46    0.72
   8   0   2   26.92    0.82
  -9   0  -2   24.30    0.70
  -9   0  -2   25.82    0.90
   9   0   2   24.76    0.82
 -10   0  -2    1.49    0.38
 -10   0  -2    1.40    0.23
  10   0   2    2.17    0.33
 -11   0  -2    0.83    0.22
 -11   0  -2    0.81    0.39
  11   0   2    1.10    0.32
 -12   0  -2    1.58    0.26
 -12   0  -2    2.18    0.46
  12   0   2    1.72    0.38
 -13   0  -2    0.38    0.40
 -13   0  -2    0.42    0.22
  13   0   2    0.16    0.32
  13  -1  -2    0.53    0.36
 -13   1   2    0.40    0.19
  12  -1  -2   -0.16    0.29
 -12   1   2    0.23    0.16
  11  -1  -2    2.10    0.37
 -11   1   2    1.44    0.19
 -11   1   2    2.11    0.41
  10  -1  -2    5.53    0.42
  10  -1  -2    5.93    0.39
 -10   1   2    4.86    0.26
 -10   1   2    6.14    0.47
   9  -1  -2    5.92    0.39
   9  -1  -2    6.57    0.42
  -9   1   2    6.70    0.28
  -9   1   2    7.12    0.44
  -9   1   2    6.85    0.27
   8  -1  -2   36.75    1.02
   8  -1  -2   37.14    1.00
  -8   1   2   35.75    0.86
  -8   1   2   35.27    1.04
  -8   1   2   36.43    0.85
   7  -1  -2    4.76    0.32
   7  -1  -2    5.00    0.33
  -7   1   2    4.65    0.19
  -7   1   2    4.63    0.35
  -7   1   2    4.43    0.18
   6  -1  -2   38.77    1.00
   6  -1  -2   37.52    1.00
  -6   1   2   38.99    0.87
  -6   1   2   38.46    0.86
  -6   1   2   39.45    1.02
   5  -1  -2   80.92    1.82
   5  -1  -2   82.69    1.86
   5  -1  -2   78.77    1.87
  -5   1   2   81.50    1.74
  -5   1   2   81.05    1.88
  -5   1   2   81.10    1.74
   4  -1  -2  143.62    3.13
   4  -1  -2  139.14    3.14
   4  -1  -2  140.82    3.02
  -4   1   2  145.21    3.02
  -4   1   2  141.53    3.02
   3  -1  -2   24.09    0.58
   3  -1  -2   23.07    0.61
   3  -1  -2   23.98    0.60
  -3   1   2   23.43    0.53
  -3   1   2   23.95    0.53
   2  -1  -2    0.47    0.08
   2  -1  -2    0.44    0.10
   2  -1  -2    0.23    0.11
  -2   1   2    0.36    0.06
  -2   1   2    0.42    0.07
   1  -1  -2   20.66    0.52
  -1   1   2   21.34    0.49
  -1   1   2   21.43    0.50
   0  -1  -2  216.73    4.55
   0  -1  -2  205.91    4.53
   0   1   2  210.54    4.58
   0   1   2  209.50    4.38
   0   1   2  218.18    4.57
  -1  -1  -2  309.01    6.37
  -1  -1  -2  290.59    6.43
   1   1   2  292.64    6.35
   1   1   2  294.46    6.40
  -2  -1  -2  186.55    3.89
  -2  -1  -2  184.11    3.90
  -2  -1  -2  174.55    3.91
   2   1   2  182.72    3.76
   2   1   2  182.54    3.97
  -3  -1  -2    1.23    0.11
  -3  -1  -2    0.96    0.10
  -3  -1  -2    1.17    0.11
   3   1   2    0.98    0.13
   3   1   2    1.19    0.16
  -4  -1  -2   21.17    0.52
  -4  -1  -2   20.97    0.53
  -4  -1  -2   21.53    0.52
   4   1   2   21.29    0.61
   4   1   2   20.87    0.56
  -5  -1  -2  171.44    3.77
  -5  -1  -2  175.70    3.73
  -5  -1  -2  170.38    3.73
   5   1   2  171.89    3.68
   5   1   2  177.06    3.88
  -6  -1  -2   41.72    1.02
  -6  -1  -2   42.94    0.99
  -6  -1  -2   42.53    0.99
   6   1   2   41.88    1.13
   6   1   2   42.75    1.06
  -7  -1  -2    3.57    0.21
  -7  -1  -2    3.83    0.21
  -7  -1  -2    3.87    0.26
  -7  -1  -2    3.74    0.38
   7   1   2    3.40    0.30
   7   1   2    3.87    0.29
  -8  -1  -2    2.97    0.27
  -8  -1  -2    2.89    0.22
  -8  -1  -2    2.27    0.21
  -8  -1  -2    2.70    0.39
   8   1   2    2.79    0.31
  -9  -1  -2    5.56    0.28
  -9  -1  -2    4.77    0.49
   9   1   2    5.65    0.39
 -10  -1  -2    8.86    0.58
 -10  -1  -2    9.01    0.37
  10   1   2    9.25    0.49
 -11  -1  -2    3.90    0.28
 -11  -1  -2    4.44    0.52
  11   1   2    3.83    0.42
 -12  -1  -2    0.15    0.20
 -12  -1  -2   -0.27    0.38
  12   1   2    0.44    0.30
 -13  -1  -2    0.08    0.21
 -13  -1  -2    0.18    0.41
  13   1   2    0.40    0.33
  13  -2  -2    1.72    0.41
 -13   2   2    1.66    0.26
  12  -2  -2    3.73    0.47
 -12   2   2    4.00    0.30
  11  -2  -2    2.62    0.40
 -11   2   2    3.26    0.45
 -11   2   2    3.66    0.28
  10  -2  -2   -0.36    0.25
 -10   2   2   -0.13    0.30
 -10   2   2   -0.04    0.16
   9  -2  -2    0.95    0.26
   9  -2  -2    0.92    0.26
  -9   2   2    0.62    0.17
  -9   2   2    1.12    0.30
   8  -2  -2    3.40    0.35
   8  -2  -2    3.24    0.31
  -8   2   2    2.68    0.22
  -8   2   2    2.90    0.23
  -8   2   2    3.43    0.36
   7  -2  -2   24.77    0.71
   7  -2  -2   22.83    0.73
  -7   2   2   23.96    0.61
  -7   2   2   23.09    0.62
  -7   2   2   23.60    0.73
   6  -2  -2   21.03    0.65
   6  -2  -2   21.33    0.63
  -6   2   2   22.03    0.66
  -6   2   2   21.61    0.54
  -6   2   2   20.94    0.55
   5  -2  -2   -0.05    0.16
   5  -2  -2    0.09    0.16
  -5   2   2   -0.28    0.17
  -5   2   2    0.18    0.11
  -5   2   2    0.06    0.09
   4  -2  -2   12.55    0.41
   4  -2  -2   12.90    0.41
  -4   2   2   12.23    0.40
  -4   2   2   12.59    0.35
  -4   2   2   12.57    0.34
   3  -2  -2   47.64    1.13
   3  -2  -2   47.50    1.10
  -3   2   2   48.05    1.07
  -3   2   2   49.21    1.11
  -3   2   2   48.48    1.09
   2  -2  -2  364.94    7.50
   2  -2  -2  350.24    7.69
  -2   2   2  360.09    7.71
  -2   2   2  359.99    7.69
   1  -2  -2   50.60    1.13
   1  -2  -2   50.30    1.15
  -1   2   2   50.53    1.12
  -1   2   2   50.71    1.11
   0  -2  -2    0.22    0.11
   0  -2  -2   -0.01    0.10
   0   2   2   -0.11    0.09
   0   2   2    0.12    0.09
   0   2   2   -0.01    0.09
  -1  -2  -2   41.49    0.94
  -1  -2  -2   41.68    0.95
   1   2   2   41.11    0.92
   1   2   2   41.44    0.88
   1   2   2   41.95    0.95
  -2  -2  -2  695.98   15.16
  -2  -2  -2  683.42   15.07
  -2  -2  -2  701.03   15.11
   2   2   2  712.30   15.32
   2   2   2  725.43   14.54
  -3  -2  -2   75.86    1.63
  -3  -2  -2   73.50    1.66
  -3  -2  -2   73.55    1.64
   3   2   2   75.56    1.72
   3   2   2   74.60    1.60
  -4  -2  -2   47.06    1.12
  -4  -2  -2   49.05    1.06
  -4  -2  -2   47.23    1.07
   4   2   2   47.40    1.17
   4   2   2   47.40    1.08
  -5  -2  -2    0.22    0.09
  -5  -2  -2    0.20    0.09
  -5  -2  -2   -0.11    0.15
   5   2   2    0.34    0.14
   5   2   2   -0.19    0.16
  -6  -2  -2   67.34    1.50
  -6  -2  -2   67.46    1.58
  -6  -2  -2   67.78    1.49
   6   2   2   67.13    1.54
   6   2   2   66.82    1.66
  -7  -2  -2   14.14    0.40
  -7  -2  -2   13.64    0.48
  -7  -2  -2   13.60    0.39
   7   2   2   14.32    0.55
   7   2   2   13.88    0.49
  -8  -2  -2   19.32    0.53
  -8  -2  -2   19.27    0.52
  -8  -2  -2   18.60    0.61
   8   2   2   19.33    0.64
   8   2   2   19.16    0.70
  -9  -2  -2   14.93    0.47
  -9  -2  -2   15.93    0.47
  -9  -2  -2   15.39    0.57
   9   2   2   15.41    0.65
   9   2   2   15.73    0.59
 -10  -2  -2   -0.13    0.15
 -10  -2  -2   -0.68    0.32
  10   2   2    0.27    0.24
 -11  -2  -2    2.31    0.24
 -11  -2  -2    2.15    0.44
  11   2   2    2.48    0.37
 -12  -2  -2    4.25    0.29
 -12  -2  -2    5.87    0.60
  12   2   2    5.34    0.50
 -13  -2  -2    0.66    0.44
 -13  -2  -2    0.57    0.21
  13   2   2    0.74    0.35
  13  -3  -2   -0.08    0.31
 -13   3   2   -0.17    0.20
  12  -3  -2    0.84    0.34
 -12   3   2    0.41    0.23
  11  -3  -2    3.92    0.44
 -11   3   2    4.54    0.49
 -11   3   2    3.36    0.31
  10  -3  -2    5.34    0.44
 -10   3   2    5.45    0.33
 -10   3   2    6.08    0.45
   9  -3  -2    4.47    0.34
   9  -3  -2    4.01    0.40
  -9   3   2    4.24    0.41
  -9   3   2    4.40    0.28
   8  -3  -2    3.34    0.35
   8  -3  -2    3.48    0.31
  -8   3   2    3.36    0.36
  -8   3   2    3.21    0.24
   7  -3  -2   -0.16    0.20
   7  -3  -2   -0.26    0.20
  -7   3   2    0.05    0.14
  -7   3   2   -0.48    0.22
  -7   3   2    0.04    0.14
   6  -3  -2   35.03    0.94
   6  -3  -2   34.08    0.90
  -6   3   2   33.01    0.92
  -6   3   2   34.61    0.87
  -6   3   2   35.22    0.85
   5  -3  -2  119.49    2.69
   5  -3  -2  120.73    2.64
  -5   3   2  118.38    2.64
  -5   3   2  123.07    2.66
  -5   3   2  118.67    2.71
   4  -3  -2   52.10    1.23
   4  -3  -2   50.60    1.21
  -4   3   2   51.88    1.19
  -4   3   2   51.44    1.21
  -4   3   2   52.85    1.23
   3  -3  -2    5.80    0.25
   3  -3  -2    5.29    0.24
  -3   3   2    5.53    0.23
  -3   3   2    5.31    0.21
  -3   3   2    5.36    0.23
   2  -3  -2   30.26    0.76
   2  -3  -2   31.52    0.73
  -2   3   2   30.97    0.73
  -2   3   2   30.67    0.73
   1  -3  -2  188.36    3.84
   1  -3  -2  187.46    4.03
   1  -3  -2  179.47    4.00
  -1   3   2  187.41    4.02
   0  -3  -2   17.88    0.48
   0  -3  -2   18.65    0.48
   0   3   2   18.23    0.43
   0   3   2   17.99    0.46
   0   3   2   19.10    0.47
  -1  -3  -2  134.49    2.93
  -1  -3  -2  132.82    2.91
   1   3   2  132.87    2.76
   1   3   2  134.61    2.94
   1   3   2  136.13    2.90
  -2  -3  -2   12.05    0.34
  -2  -3  -2   11.48    0.36
   2   3   2   12.18    0.37
   2   3   2   11.89    0.29
  -3  -3  -2   69.37    1.53
  -3  -3  -2   68.64    1.51
  -3  -3  -2   67.73    1.57
   3   3   2   68.60    1.60
   3   3   2   70.91    1.47
  -4  -3  -2  122.41    2.67
  -4  -3  -2  125.09    2.66
  -4  -3  -2  121.58    2.74
   4   3   2  124.68    2.60
   4   3   2  122.57    2.79
  -5  -3  -2  271.19    5.69
  -5  -3  -2  263.88    5.81
  -5  -3  -2  266.89    5.70
   5   3   2  266.77    5.55
   5   3   2  266.90    5.89
  -6  -3  -2   43.39    1.11
  -6  -3  -2   45.63    1.00
  -6  -3  -2   43.34    1.01
   6   3   2   44.72    1.06
   6   3   2   43.80    1.17
  -7  -3  -2    0.15    0.10
  -7  -3  -2    0.01    0.10
  -7  -3  -2   -0.01    0.19
   7   3   2    0.09    0.20
   7   3   2   -0.06    0.15
  -8  -3  -2    0.97    0.26
  -8  -3  -2    0.89    0.14
  -8  -3  -2    0.83    0.15
   8   3   2    0.54    0.22
   8   3   2    0.34    0.25
  -9  -3  -2    5.09    0.24
  -9  -3  -2    4.82    0.38
  -9  -3  -2    5.03    0.25
   9   3   2    5.05    0.43
   9   3   2    4.90    0.36
 -10  -3  -2    6.05    0.28
  10   3   2    6.50    0.42
  10   3   2    5.60    0.45
 -11  -3  -2    2.41    0.44
 -11  -3  -2    2.41    0.23
  11   3   2    2.59    0.37
 -12  -3  -2   -0.08    0.39
 -12  -3  -2    0.02    0.17
  12   3   2    0.26    0.28
 -13  -3  -2    0.69    0.20
 -13  -3  -2    1.29    0.46
  13   3   2    1.37    0.36
 -14  -3  -2    0.56    0.19
  13  -4  -2    1.19    0.38
 -13   4   2    1.18    0.27
  12  -4  -2    1.87    0.41
 -12   4   2    1.87    0.29
  11  -4  -2    1.00    0.33
 -11   4   2    0.73    0.24
 -11   4   2    0.48    0.36
  10  -4  -2    1.85    0.35
 -10   4   2    1.32    0.24
 -10   4   2    1.37    0.36
   9  -4  -2    5.07    0.41
  -9   4   2    5.65    0.34
  -9   4   2    5.76    0.43
   8  -4  -2    9.34    0.42
   8  -4  -2    8.35    0.47
  -8   4   2    9.57    0.48
  -8   4   2    8.53    0.39
   7  -4  -2    5.28    0.33
   7  -4  -2    4.32    0.35
  -7   4   2    5.50    0.30
  -7   4   2    5.44    0.36
   6  -4  -2   -0.06    0.17
   6  -4  -2    0.23    0.19
  -6   4   2    0.13    0.20
  -6   4   2    0.13    0.15
  -6   4   2    0.20    0.15
   5  -4  -2    1.03    0.19
   5  -4  -2    1.36    0.22
  -5   4   2    0.85    0.15
  -5   4   2    1.18    0.18
  -5   4   2    0.89    0.20
   4  -4  -2   47.23    1.15
   4  -4  -2   48.02    1.15
  -4   4   2   48.15    1.16
  -4   4   2   47.65    1.14
  -4   4   2   48.73    1.17
   3  -4  -2  136.01    3.02
   3  -4  -2  135.94    2.92
  -3   4   2  138.45    3.00
  -3   4   2  135.83    3.03
   2  -4  -2  192.38    4.29
   2  -4  -2  199.44    4.10
   2  -4  -2  204.99    4.27
  -2   4   2  192.82    4.25
  -2   4   2  193.27    4.29
   1  -4  -2   86.29    1.97
   1  -4  -2   86.76    1.85
   1  -4  -2   88.49    1.95
  -1   4   2   85.41    1.95
  -1   4   2   88.73    1.94
   0  -4  -2  101.72    2.34
   0  -4  -2  103.07    2.33
   0  -4  -2  107.35    2.20
   0   4   2  107.99    2.32
   0   4   2  107.10    2.35
  -1  -4  -2  289.97    6.33
  -1  -4  -2  296.43    6.37
   1   4   2  291.27    6.05
   1   4   2  295.76    6.31
   1   4   2  302.20    6.40
  -2  -4  -2   88.17    2.01
  -2  -4  -2   86.40    1.97
   2   4   2   91.12    1.84
   2   4   2   89.86    2.02
  -3  -4  -2   73.64    1.72
  -3  -4  -2   73.86    1.67
  -3  -4  -2   74.83    1.65
   3   4   2   73.93    1.74
   3   4   2   77.04    1.57
  -4  -4  -2   10.49    0.40
  -4  -4  -2   11.46    0.32
  -4  -4  -2   10.99    0.33
   4   4   2   10.59    0.42
   4   4   2   11.57    0.32
  -5  -4  -2   20.58    0.53
  -5  -4  -2   20.50    0.64
  -5  -4  -2   20.71    0.51
   5   4   2   20.76    0.65
   5   4   2   20.17    0.53
  -6  -4  -2   58.35    1.44
  -6  -4  -2   59.29    1.31
  -6  -4  -2   58.19    1.33
   6   4   2   59.03    1.33
   6   4   2   58.08    1.48
  -7  -4  -2   31.64    0.77
  -7  -4  -2   32.92    0.76
  -7  -4  -2   30.56    0.90
   7   4   2   31.77    0.83
   7   4   2   32.46    0.95
  -8  -4  -2   12.83    0.37
  -8  -4  -2   12.65    0.53
  -8  -4  -2   12.55    0.38
   8   4   2   11.83    0.47
   8   4   2   12.26    0.55
  -9  -4  -2    1.86    0.17
  -9  -4  -2    1.88    0.19
  -9  -4  -2    1.30    0.30
   9   4   2    1.71    0.34
   9   4   2    1.78    0.26
 -10  -4  -2    0.12    0.28
 -10  -4  -2    0.36    0.16
  10   4   2    0.26    0.25
  10   4   2    0.13    0.30
 -11  -4  -2    5.80    0.30
  11   4   2    6.39    0.50
  11   4   2    5.57    0.41
 -12  -4  -2    6.64    0.60
 -12  -4  -2    5.49    0.30
  12   4   2    6.13    0.52
  12   4   2    6.31    0.46
 -13  -4  -2    0.88    0.20
 -13  -4  -2    0.87    0.45
  12  -5  -2    0.72    0.36
 -12   5   2    0.71    0.26
  11  -5  -2    3.90    0.47
 -11   5   2    3.22    0.44
 -11   5   2    2.81    0.34
  10  -5  -2    2.29    0.39
 -10   5   2    3.70    0.43
 -10   5   2    2.09    0.29
   9  -5  -2   -0.13    0.25
  -9   5   2   -0.24    0.19
  -9   5   2    0.16    0.28
   8  -5  -2    0.06    0.24
   8  -5  -2    0.28    0.22
  -8   5   2    0.84    0.28
  -8   5   2    0.36    0.21
   7  -5  -2   25.04    0.83
   7  -5  -2   26.49    0.75
  -7   5   2   25.91    0.81
  -7   5   2   25.84    0.77
   6  -5  -2   52.74    1.27
   6  -5  -2   50.94    1.31
  -6   5   2   50.21    1.31
  -6   5   2   50.73    1.28
   5  -5  -2   48.00    1.20
   5  -5  -2   46.82    1.16
  -5   5   2   46.39    1.17
  -5   5   2   48.23    1.21
  -5   5   2   47.60    1.20
   4  -5  -2   48.00    1.17
   4  -5  -2   46.96    1.16
  -4   5   2   46.96    1.16
  -4   5   2   47.57    1.18
   3  -5  -2    1.76    0.21
   3  -5  -2    1.97    0.21
  -3   5   2    1.74    0.19
  -3   5   2    1.64    0.20
   2  -5  -2   91.77    2.09
   2  -5  -2   90.38    1.98
   2  -5  -2   92.74    2.08
  -2   5   2   89.91    2.06
  -2   5   2   92.33    2.08
   1  -5  -2  174.17    3.88
   1  -5  -2  180.06    3.87
   1  -5  -2  178.94    3.68
  -1   5   2  175.59    3.85
  -1   5   2  173.73    3.89
   0  -5  -2  281.98    5.71
   0  -5  -2  268.11    6.00
   0  -5  -2  275.33    6.03
   0   5   2  282.47    5.98
   0   5   2  282.11    6.06
  -1  -5  -2   38.75    0.97
  -1  -5  -2   36.53    0.95
   1   5   2   40.92    0.84
   1   5   2   40.19    0.99
   1   5   2   40.01    0.94
  -2  -5  -2    2.78    0.20
  -2  -5  -2    2.45    0.21
   2   5   2    2.87    0.24
   2   5   2    2.38    0.08
  -3  -5  -2    6.29    0.26
  -3  -5  -2    6.41    0.26
  -3  -5  -2    5.82    0.30
   3   5   2    6.56    0.17
   3   5   2    6.93    0.31
  -4  -5  -2   74.97    1.70
  -4  -5  -2   77.83    1.69
  -4  -5  -2   74.49    1.78
   4   5   2   74.62    1.59
   4   5   2   74.16    1.79
  -5  -5  -2   99.95    2.24
  -5  -5  -2   99.99    2.34
  -5  -5  -2  104.35    2.23
   5   5   2   98.41    2.36
   5   5   2  101.59    2.14
  -6  -5  -2    3.70    0.33
  -6  -5  -2    3.74    0.20
  -6  -5  -2    3.63    0.20
   6   5   2    3.99    0.35
   6   5   2    3.96    0.22
  -7  -5  -2    4.19    0.22
  -7  -5  -2    4.46    0.21
  -7  -5  -2    4.30    0.34
   7   5   2    4.22    0.34
   7   5   2    4.31    0.26
  -8  -5  -2   14.53    0.41
  -8  -5  -2   13.22    0.43
  -8  -5  -2   14.76    0.59
   8   5   2   13.19    0.59
   8   5   2   13.98    0.49
  -9  -5  -2   10.20    0.52
  -9  -5  -2   10.02    0.36
  -9  -5  -2   10.05    0.34
   9   5   2    9.69    0.52
   9   5   2    9.54    0.44
 -10  -5  -2    4.39    0.43
 -10  -5  -2    3.95    0.26
  10   5   2    3.45    0.42
  10   5   2    4.31    0.36
 -11  -5  -2    1.37    0.21
 -11  -5  -2    0.99    0.37
  11   5   2    1.13    0.30
  11   5   2    1.52    0.36
 -12  -5  -2   -0.04    0.17
  12   5   2    0.10    0.35
 -13  -5  -2    0.94    0.48
 -13  -5  -2    0.63    0.20
  12  -6  -2    0.58    0.36
 -12   6   2    0.59    0.27
  11  -6  -2    0.25    0.32
 -11   6   2    0.01    0.25
  10  -6  -2    2.47    0.40
 -10   6   2    3.14    0.42
 -10   6   2    2.12    0.33
   9  -6  -2    6.94    0.48
  -9   6   2    6.91    0.49
  -9   6   2    6.83    0.43
   8  -6  -2    9.36    0.51
  -8   6   2    8.72    0.44
  -8   6   2    9.21    0.49
   7  -6  -2    9.18    0.41
   7  -6  -2    7.83    0.46
  -7   6   2    8.14    0.42
  -7   6   2    8.55    0.46
   6  -6  -2    1.16    0.27
   6  -6  -2    1.24    0.24
  -6   6   2    0.89    0.22
  -6   6   2    1.12    0.28
   5  -6  -2   10.98    0.42
   5  -6  -2   10.55    0.45
  -5   6   2    9.80    0.44
  -5   6   2    9.69    0.42
   4  -6  -2   18.99    0.61
   4  -6  -2   20.20    0.61
  -4   6   2   20.04    0.61
  -4   6   2   19.98    0.63
   3  -6  -2   85.91    1.90
   3  -6  -2   82.01    1.91
   3  -6  -2   78.31    1.82
  -3   6   2   81.68    1.92
  -3   6   2   80.18    1.89
   2  -6  -2   82.24    1.86
   2  -6  -2   77.70    1.85
   2  -6  -2   80.68    1.76
  -2   6   2   78.18    1.86
  -2   6   2   77.99    1.83
   1  -6  -2    5.41    0.30
   1  -6  -2    5.73    0.24
   1  -6  -2    5.65    0.30
  -1   6   2    5.74    0.29
  -1   6   2    5.45    0.28
   0  -6  -2   58.73    1.49
   0  -6  -2   62.14    1.49
   0  -6  -2   65.48    1.36
   0   6   2   64.88    1.47
   0   6   2   63.02    1.51
  -1  -6  -2  204.97    4.52
  -1  -6  -2  200.66    4.50
   1   6   2  199.88    4.55
   1   6   2  209.98    4.47
   1   6   2  211.99    4.22
  -2  -6  -2  153.49    3.50
  -2  -6  -2  160.32    3.47
   2   6   2  161.35    3.43
   2   6   2  151.17    3.51
  -3  -6  -2    3.62    0.23
  -3  -6  -2    3.42    0.29
   3   6   2    3.63    0.27
  -4  -6  -2    5.64    0.26
  -4  -6  -2    6.21    0.36
  -4  -6  -2    5.32    0.27
   4   6   2    5.41    0.16
   4   6   2    5.44    0.33
  -5  -6  -2    4.70    0.24
  -5  -6  -2    3.69    0.33
  -5  -6  -2    4.33    0.24
   5   6   2    4.36    0.18
   5   6   2    4.60    0.35
  -6  -6  -2   23.36    0.65
  -6  -6  -2   24.86    0.64
  -6  -6  -2   23.55    0.76
   6   6   2   24.01    0.78
   6   6   2   24.05    0.60
  -7  -6  -2    5.03    0.39
  -7  -6  -2    5.02    0.26
  -7  -6  -2    5.23    0.26
   7   6   2    4.57    0.40
   7   6   2    4.88    0.25
  -8  -6  -2    2.15    0.20
  -8  -6  -2    1.78    0.20
  -8  -6  -2    1.31    0.32
   8   6   2    2.07    0.23
   8   6   2    1.67    0.32
  -9  -6  -2    1.03    0.31
  -9  -6  -2    0.73    0.17
   9   6   2    0.55    0.31
   9   6   2    0.70    0.20
 -10  -6  -2    5.12    0.46
 -10  -6  -2    5.34    0.30
  10   6   2    5.41    0.48
 -11  -6  -2    6.17    0.33
 -11  -6  -2    7.28    0.56
  11   6   2    6.33    0.52
 -12  -6  -2    3.98    0.29
  12   6   2    2.90    0.46
 -13  -6  -2    0.12    0.19
  13   6   2   -0.31    0.34
  12  -7  -2    0.62    0.37
 -12   7   2    0.78    0.30
  11  -7  -2    2.48    0.43
 -11   7   2    2.03    0.35
  10  -7  -2    1.41    0.37
 -10   7   2    1.37    0.39
 -10   7   2    1.15    0.31
   9  -7  -2    0.26    0.27
  -9   7   2   -0.33    0.23
  -9   7   2   -0.66    0.31
   8  -7  -2    1.77    0.32
  -8   7   2    1.22    0.27
  -8   7   2    1.53    0.35
   7  -7  -2   14.44    0.61
  -7   7   2   14.70    0.63
  -7   7   2   13.55    0.57
   6  -7  -2   25.22    0.82
   6  -7  -2   26.14    0.77
  -6   7   2   25.86    0.82
  -6   7   2   27.70    0.85
   5  -7  -2   10.43    0.45
   5  -7  -2   11.29    0.48
  -5   7   2   10.36    0.49
  -5   7   2   10.50    0.45
   4  -7  -2    0.24    0.18
   4  -7  -2    0.04    0.18
  -4   7   2   -0.09    0.16
  -4   7   2    0.08    0.21
   3  -7  -2    4.38    0.31
   3  -7  -2    4.44    0.30
   3  -7  -2    4.15    0.26
  -3   7   2    3.84    0.31
  -3   7   2    4.42    0.28
   2  -7  -2   43.23    1.15
   2  -7  -2   46.18    1.08
   2  -7  -2   48.09    1.18
  -2   7   2   44.48    1.15
  -2   7   2   45.21    1.18
   1  -7  -2  138.46    3.19
   1  -7  -2  145.53    3.21
   1  -7  -2  143.66    3.00
  -1   7   2  141.94    3.17
  -1   7   2  138.55    3.22
   0  -7  -2   44.21    1.14
   0  -7  -2   42.76    1.14
   0  -7  -2   45.12    1.00
   0   7   2   46.81    1.12
   0   7   2   45.39    1.17
  -1  -7  -2   24.99    0.73
  -1  -7  -2   25.57    0.75
   1   7   2   25.62    0.76
   1   7   2   25.76    0.58
   1   7   2   26.87    0.71
  -2  -7  -2   14.73    0.53
  -2  -7  -2   13.62    0.49
   2   7   2   14.40    0.53
   2   7   2   14.96    0.46
  -3  -7  -2   61.44    1.56
  -3  -7  -2   63.77    1.52
   3   7   2   63.62    1.57
  -4  -7  -2   26.47    0.82
  -4  -7  -2   27.38    0.73
  -4  -7  -2   27.79    0.76
   4   7   2   27.07    0.82
  -5  -7  -2   33.14    0.70
  -5  -7  -2   32.97    0.96
  -5  -7  -2   33.53    0.85
  -5  -7  -2   31.84    0.87
   5   7   2   32.38    0.96
  -6  -7  -2   -0.16    0.14
  -6  -7  -2   -0.09    0.24
  -6  -7  -2   -0.13    0.14
   6   7   2   -0.12    0.22
   6   7   2   -0.14    0.10
  -7  -7  -2    7.28    0.34
  -7  -7  -2    7.56    0.47
   7   7   2    6.93    0.47
  -8  -7  -2    5.19    0.30
  -8  -7  -2    5.25    0.47
   8   7   2    4.81    0.41
  -9  -7  -2    5.71    0.32
  -9  -7  -2    6.64    0.50
   9   7   2    6.26    0.48
 -10  -7  -2    0.41    0.18
 -10  -7  -2    0.50    0.33
  10   7   2    0.40    0.33
 -11  -7  -2   -0.56    0.34
 -11  -7  -2    0.08    0.18
  11   7   2    0.36    0.35
 -12  -7  -2    0.85    0.22
  12   7   2    1.06    0.39
 -13  -7  -2    1.17    0.23
  13   7   2    1.73    0.43
  11  -8  -2    0.38    0.33
 -11   8   2    0.63    0.31
  10  -8  -2    4.19    0.48
 -10   8   2    4.63    0.52
 -10   8   2    3.42    0.42
   9  -8  -2    6.02    0.51
  -9   8   2    6.16    0.47
  -9   8   2    6.14    0.50
   8  -8  -2    7.46    0.51
  -8   8   2    6.87    0.46
  -8   8   2    6.88    0.50
   7  -8  -2    1.79    0.32
  -7   8   2    1.73    0.35
  -7   8   2    1.25    0.29
   6  -8  -2    0.20    0.23
   6  -8  -2    0.31    0.22
  -6   8   2   -0.30    0.26
  -6   8   2   -0.03    0.22
   5  -8  -2   10.33    0.47
   5  -8  -2   10.59    0.46
  -5   8   2   10.86    0.52
  -5   8   2   10.44    0.49
   4  -8  -2   22.26    0.71
   4  -8  -2   22.82    0.71
  -4   8   2   23.62    0.75
  -4   8   2   22.76    0.76
   3  -8  -2    5.91    0.33
   3  -8  -2    5.64    0.36
  -3   8   2    5.25    0.37
  -3   8   2    5.81    0.34
   2  -8  -2   13.42    0.50
   2  -8  -2   12.32    0.49
   2  -8  -2   12.70    0.43
  -2   8   2   12.60    0.49
  -2   8   2   12.81    0.50
   1  -8  -2    4.75    0.24
   1  -8  -2    4.99    0.35
   1  -8  -2    4.13    0.31
  -1   8   2    3.59    0.30
  -1   8   2    4.56    0.34
   0  -8  -2   48.51    1.27
   0  -8  -2   50.63    1.12
   0  -8  -2   51.94    1.30
   0   8   2   49.47    1.24
   0   8   2   48.82    1.30
  -1  -8  -2   52.82    1.37
  -1  -8  -2   56.56    1.38
   1   8   2   52.17    1.15
   1   8   2   55.09    1.32
   1   8   2   52.39    1.38
  -2  -8  -2   43.80    1.14
  -2  -8  -2   42.09    1.15
   2   8   2   44.21    1.08
   2   8   2   41.73    1.16
  -3  -8  -2   -0.27    0.21
  -3  -8  -2   -0.25    0.15
   3   8   2   -0.08    0.21
  -4  -8  -2    4.46    0.29
  -4  -8  -2    3.95    0.36
   4   8   2    3.93    0.33
  -5  -8  -2   16.02    0.64
  -5  -8  -2   15.91    0.55
   5   8   2   16.38    0.64
  -6  -8  -2   10.23    0.44
  -6  -8  -2   10.21    0.54
   6   8   2   10.79    0.55
  -7  -8  -2    0.12    0.18
  -7  -8  -2   -0.13    0.29
   7   8   2   -0.17    0.28
  -8  -8  -2    0.02    0.18
  -8  -8  -2   -0.60    0.28
   8   8   2   -0.20    0.25
  -9  -8  -2    3.82    0.30
  -9  -8  -2    3.54    0.44
   9   8   2    3.05    0.41
 -10  -8  -2    4.97    0.51
 -10  -8  -2    3.95    0.31
  10   8   2    4.30    0.49
 -11  -8  -2    3.02    0.30
 -11  -8  -2    4.03    0.52
  11   8   2    3.50    0.48
 -12  -8  -2    0.71    0.23
 -12  -8  -2    0.90    0.42
  12   8   2    0.88    0.39
 -13  -8  -2    0.27    0.21
  13   8   2   -0.40    0.35
 -11   9   2    1.79    0.39
  10  -9  -2    0.01    0.31
 -10   9   2    0.43    0.31
 -10   9   2   -0.19    0.37
   9  -9  -2    0.95    0.34
  -9   9   2    0.62    0.31
  -9   9   2    0.39    0.37
   8  -9  -2    3.93    0.43
  -8   9   2    3.82    0.43
  -8   9   2    4.56    0.49
   7  -9  -2   10.77    0.56
  -7   9   2   11.87    0.61
  -7   9   2   10.99    0.58
   6  -9  -2    9.39    0.49
  -6   9   2    9.91    0.50
  -6   9   2    9.42    0.54
   5  -9  -2    4.65    0.35
   5  -9  -2    5.19    0.38
  -5   9   2    6.32    0.44
  -5   9   2    5.21    0.40
   4  -9  -2    0.85    0.26
   4  -9  -2    1.06    0.24
  -4   9   2    0.40    0.29
  -4   9   2    1.19    0.25
   3  -9  -2    8.55    0.40
   3  -9  -2    9.55    0.46
  -3   9   2    8.67    0.49
  -3   9   2    8.34    0.43
   2  -9  -2   13.56    0.55
   2  -9  -2   14.00    0.47
   2  -9  -2   14.51    0.58
  -2   9   2   13.11    0.56
  -2   9   2   13.07    0.53
   1  -9  -2   18.43    0.65
   1  -9  -2   18.56    0.67
   1  -9  -2   19.56    0.54
  -1   9   2   19.47    0.70
  -1   9   2   19.77    0.64
   0  -9  -2    3.79    0.31
   0  -9  -2    3.87    0.20
   0  -9  -2    3.28    0.33
   0   9   2    3.11    0.35
   0   9   2    3.74    0.31
  -1  -9  -2    8.78    0.45
  -1  -9  -2    9.10    0.43
   1   9   2   10.26    0.42
   1   9   2    8.91    0.27
   1   9   2    9.88    0.46
  -2  -9  -2   41.30    1.16
  -2  -9  -2   42.55    1.15
   2   9   2   42.46    1.18
  -3  -9  -2   28.45    0.85
  -3  -9  -2   28.12    0.88
   3   9   2   29.56    0.90
  -4  -9  -2   27.73    0.86
  -4  -9  -2   23.61    0.77
   4   9   2   26.02    0.86
  -5  -9  -2    0.84    0.31
  -5  -9  -2    0.36    0.21
   5   9   2    0.75    0.30
  -6  -9  -2   17.24    0.62
  -6  -9  -2   18.31    0.73
   6   9   2   16.90    0.72
  -7  -9  -2   14.25    0.65
  -7  -9  -2   11.54    0.49
   7   9   2   12.61    0.64
  -8  -9  -2   12.67    0.52
  -8  -9  -2   13.30    0.66
   8   9   2   12.87    0.64
  -9  -9  -2    3.02    0.30
  -9  -9  -2    3.70    0.47
   9   9   2    3.55    0.45
 -10  -9  -2    0.19    0.20
 -10  -9  -2    0.07    0.38
  10   9   2    0.21    0.34
 -11  -9  -2   -0.31    0.19
 -11  -9  -2    0.55    0.38
  11   9   2    0.37    0.35
 -12  -9  -2    1.64    0.27
 -12  -9  -2    1.42    0.46
  12   9   2    1.39    0.42
  10 -10  -2    2.90    0.47
 -10  10   2    2.74    0.44
   9 -10  -2    2.71    0.43
  -9  10   2    3.25    0.44
  -9  10   2    4.27    0.54
   8 -10  -2    0.90    0.31
  -8  10   2    0.16    0.28
  -8  10   2    1.60    0.41
   7 -10  -2    0.48    0.27
  -7  10   2    0.11    0.33
  -7  10   2   -0.28    0.27
   6 -10  -2    5.18    0.40
  -6  10   2    5.91    0.46
  -6  10   2    5.44    0.48
   5 -10  -2   13.36    0.56
   5 -10  -2   12.72    0.56
  -5  10   2   12.86    0.60
  -5  10   2   14.85    0.66
   4 -10  -2   14.93    0.61
   4 -10  -2   14.70    0.58
  -4  10   2   15.42    0.64
  -4  10   2   15.47    0.67
   3 -10  -2    8.97    0.41
   3 -10  -2    8.82    0.46
  -3  10   2    8.33    0.45
  -3  10   2    7.62    0.49
   2 -10  -2    0.04    0.25
   2 -10  -2    0.21    0.17
  -2  10   2    0.02    0.28
  -2  10   2   -0.28    0.22
   1 -10  -2    6.34    0.42
   1 -10  -2    5.67    0.30
   1 -10  -2    5.78    0.41
  -1  10   2    5.74    0.38
  -1  10   2    5.58    0.46
   0 -10  -2   24.92    0.81
   0 -10  -2   24.94    0.84
   0 -10  -2   24.88    0.64
   0  10   2   23.84    0.85
   0  10   2   25.19    0.79
  -1 -10  -2   33.76    1.02
  -1 -10  -2   36.10    1.04
   1  10   2   33.50    1.04
  -2 -10  -2    0.76    0.26
  -2 -10  -2    0.55    0.28
   2  10   2    0.59    0.28
  -3 -10  -2    2.51    0.31
  -3 -10  -2    2.48    0.36
   3  10   2    2.73    0.38
  -4 -10  -2    7.07    0.49
  -4 -10  -2    6.66    0.42
   4  10   2    6.85    0.45
  -5 -10  -2   38.35    1.16
  -5 -10  -2   37.03    1.08
  -6 -10  -2   11.09    0.61
  -6 -10  -2   10.82    0.52
   6  10   2   10.47    0.60
  -7 -10  -2    0.86    0.35
  -7 -10  -2    0.91    0.25
   7  10   2    0.31    0.30
  -8 -10  -2    0.42    0.22
  -8 -10  -2    0.19    0.34
   8  10   2    0.72    0.33
  -9 -10  -2    2.46    0.31
  -9 -10  -2    3.02    0.47
   9  10   2    2.97    0.44
 -10 -10  -2    1.92    0.30
 -10 -10  -2    2.07    0.46
  10  10   2    1.67    0.43
 -11 -10  -2    2.04    0.47
 -11 -10  -2    1.51    0.28
  11  10   2    1.79    0.43
 -12 -10  -2   -0.09    0.41
 -12 -10  -2   -0.18    0.21
  12  10   2    0.20    0.36
   9 -11  -2    0.44    0.36
  -9  11   2    0.40    0.43
  -9  11   2    0.50    0.35
   8 -11  -2    3.27    0.45
  -8  11   2    3.92    0.52
  -8  11   2    4.30    0.49
   7 -11  -2    4.74    0.47
  -7  11   2    4.47    0.52
  -7  11   2    4.05    0.46
   6 -11  -2    1.75    0.32
  -6  11   2    1.90    0.42
  -6  11   2    2.45    0.38
   5 -11  -2    0.10    0.21
  -5  11   2    0.10    0.32
  -5  11   2   -0.08    0.26
   4 -11  -2    4.19    0.32
   4 -11  -2    4.86    0.40
  -4  11   2    3.77    0.41
  -4  11   2    3.67    0.45
   3 -11  -2   13.10    0.58
   3 -11  -2   12.63    0.51
  -3  11   2   11.74    0.57
  -3  11   2   12.24    0.64
   2 -11  -2   20.29    0.75
   2 -11  -2   20.56    0.64
  -2  11   2   19.91    0.82
  -2  11   2   20.78    0.74
   1 -11  -2   13.45    0.61
   1 -11  -2   13.04    0.46
   1 -11  -2   15.18    0.65
  -1  11   2   13.50    0.63
  -1  11   2   13.28    0.57
   0 -11  -2    3.48    0.39
   0 -11  -2    3.85    0.41
   0  11   2    3.61    0.42
  -1 -11  -2    2.84    0.38
  -1 -11  -2    2.87    0.34
   1  11   2    2.76    0.38
  -2 -11  -2   17.44    0.68
  -2 -11  -2   17.52    0.71
   2  11   2   17.40    0.73
  -3 -11  -2    4.95    0.39
  -3 -11  -2    5.62    0.46
   3  11   2    5.78    0.44
  -4 -11  -2    2.10    0.38
  -4 -11  -2    1.89    0.30
   4  11   2    2.39    0.36
  -5 -11  -2    0.55    0.24
  -5 -11  -2    0.45    0.32
   5  11   2    0.49    0.31
  -6 -11  -2   11.31    0.54
  -6 -11  -2   11.36    0.64
   6  11   2   11.02    0.62
  -7 -11  -2   12.45    0.57
  -7 -11  -2   11.96    0.67
   7  11   2   11.63    0.63
  -8 -11  -2    4.98    0.53
  -8 -11  -2    4.73    0.40
   8  11   2    4.36    0.50
  -9 -11  -2    0.45    0.25
  -9 -11  -2    0.22    0.40
   9  11   2    0.76    0.38
 -10 -11  -2   -0.05    0.38
 -10 -11  -2   -0.07    0.23
  10  11   2   -0.14    0.32
 -11 -11  -2    0.24    0.24
 -11 -11  -2    0.50    0.44
  11  11   2    0.50    0.40
 -12 -11  -2    0.89    0.48
 -12 -11  -2    1.07    0.29
   8 -12  -2   -0.11    0.29
  -8  12   2   -0.01    0.30
  -8  12   2    0.27    0.42
   7 -12  -2    0.80    0.31
  -7  12   2    0.33    0.35
  -7  12   2    1.14    0.42
   6 -12  -2    4.29    0.45
  -6  12   2    4.75    0.50
  -6  12   2    3.80    0.51
   5 -12  -2    5.57    0.43
  -5  12   2    7.13    0.56
  -5  12   2    5.87    0.49
   4 -12  -2    3.58    0.36
   4 -12  -2    2.83    0.37
  -4  12   2    3.06    0.39
  -4  12   2    2.44    0.42
   3 -12  -2    0.42    0.28
   3 -12  -2    0.38    0.21
  -3  12   2    0.19    0.32
  -3  12   2    0.08    0.24
   2 -12  -2    0.19    0.29
  -2  12   2    0.56    0.35
   1 -12  -2    6.96    0.50
  -1  12   2    6.67    0.54
   0 -12  -2   11.92    0.59
   0 -12  -2   10.61    0.58
   0  12   2   10.04    0.59
  -1 -12  -2    7.69    0.51
  -1 -12  -2    9.69    0.54
   1  12   2    7.10    0.51
  -2 -12  -2    0.13    0.30
  -2 -12  -2   -0.15    0.25
   2  12   2   -0.27    0.31
  -3 -12  -2    4.62    0.47
  -3 -12  -2    4.67    0.43
   3  12   2    5.01    0.50
  -4 -12  -2    7.81    0.49
  -4 -12  -2    7.26    0.53
   4  12   2    6.79    0.49
  -5 -12  -2    6.85    0.47
  -5 -12  -2    6.74    0.53
   5  12   2    6.09    0.48
  -6 -12  -2    2.93    0.37
  -6 -12  -2    3.58    0.48
   6  12   2    3.29    0.44
  -7 -12  -2   -0.03    0.35
  -7 -12  -2   -0.11    0.23
   7  12   2    0.18    0.33
  -8 -12  -2    1.63    0.33
  -8 -12  -2    2.28    0.49
   8  12   2    1.75    0.44
  -9 -12  -2    1.13    0.30
  -9 -12  -2    2.07    0.47
   9  12   2    1.72    0.42
 -10 -12  -2    0.82    0.28
 -10 -12  -2    1.32    0.46
  10  12   2    0.80    0.41
 -11 -12  -2    0.07    0.24
 -11 -12  -2   -0.13    0.41
  11  12   2    0.46    0.42
   7 -13  -2    2.07    0.40
  -7  13   2    2.40    0.50
  -7  13   2    1.32    0.39
   6 -13  -2    0.06    0.28
  -6  13   2    0.02    0.37
  -6  13   2   -0.03    0.31
   5 -13  -2    0.72    0.30
  -5  13   2    1.15    0.43
  -5  13   2    0.69    0.35
  -4  13   2    4.55    0.55
   3 -13  -2    4.50    0.45
  -3  13   2    4.50    0.54
   2 -13  -2    2.34    0.39
  -2  13   2    1.84    0.42
   1 -13  -2    0.91    0.34
  -1  13   2    0.33    0.31
   0 -13  -2    1.37    0.35
   0  13   2    1.21    0.36
  -1 -13  -2    7.69    0.54
  -1 -13  -2    7.78    0.53
   1  13   2    7.13    0.56
  -2 -13  -2   11.72    0.67
  -2 -13  -2   12.69    0.65
   2  13   2   11.13    0.64
  -3 -13  -2    4.81    0.47
  -3 -13  -2    4.51    0.49
   3  13   2    4.43    0.49
  -4 -13  -2    0.00    0.24
  -4 -13  -2   -0.10    0.32
   4  13   2   -0.54    0.31
  -5 -13  -2    1.40    0.33
  -5 -13  -2    1.21    0.38
   5  13   2    0.97    0.38
  -6 -13  -2    4.51    0.53
  -6 -13  -2    4.33    0.44
   6  13   2    3.61    0.47
  -7 -13  -2    2.89    0.40
  -7 -13  -2    3.50    0.50
   7  13   2    3.47    0.50
  -8 -13  -2    1.26    0.33
  -8 -13  -2    0.60    0.43
   8  13   2    1.20    0.41
  -9 -13  -2   -0.27    0.39
  -9 -13  -2   -0.06    0.25
   9  13   2   -0.43    0.33
 -10 -13  -2    0.98    0.47
 -10 -13  -2    0.02    0.27
  10  13   2    0.17    0.39
  -6  14   2    2.39    0.52
  -5  14   2    1.88    0.50
  -4  14   2    0.36    0.41
   3 -14  -2    1.20    0.37
  -3  14   2    1.38    0.41
   2 -14  -2    5.15    0.51
  -2  14   2    3.66    0.51
   1 -14  -2    4.84    0.51
  -1  14   2    4.43    0.56
   0 -14  -2    3.30    0.45
   0  14   2    3.10    0.48
  -1 -14  -2    0.60    0.35
   1  14   2    0.69    0.39
  -2 -14  -2    0.49    0.33
  -2 -14  -2    0.79    0.38
   2  14   2    0.40    0.39
  -3 -14  -2    5.06    0.54
  -3 -14  -2    4.91    0.50
   3  14   2    4.12    0.51
  -4 -14  -2    7.82    0.60
  -4 -14  -2    6.41    0.50
   4  14   2    5.83    0.52
  -5 -14  -2    4.47    0.47
  -5 -14  -2    5.49    0.57
   5  14   2    5.10    0.56
  -6 -14  -2    0.22    0.39
  -6 -14  -2   -0.07    0.26
   6  14   2   -0.01    0.36
  -7 -14  -2   -0.37    0.37
  -7 -14  -2    0.30    0.30
   7  14   2   -0.15    0.37
  -8 -14  -2    1.36    0.48
  -8 -14  -2    1.05    0.33
   8  14   2    1.20    0.43
  -9 -14  -2    0.95    0.34
  -9 -14  -2    2.13    0.51
   9  14   2    1.73    0.47
  -5  15   2    0.89    0.46
  -4  15   2    3.04    0.54
  -3  15   2    2.31    0.51
   2 -15  -2    0.87    0.36
  -2  15   2    0.51    0.41
   1 -15  -2    0.61    0.37
  -1  15   2    0.42    0.39
   0 -15  -2    1.89    0.42
   0  15   2    1.65    0.43
  -1 -15  -2    3.52    0.50
   1  15   2    4.15    0.54
  -2 -15  -2    3.65    0.51
   2  15   2    3.63    0.52
  -3 -15  -2    0.57    0.40
  -3 -15  -2    0.81    0.36
   3  15   2    0.26    0.37
  -4 -15  -2   -0.19    0.39
  -4 -15  -2   -0.26    0.31
   4  15   2    0.05    0.35
  -5 -15  -2    2.80    0.51
  -5 -15  -2    2.36    0.44
   5  15   2    2.50    0.49
  -6 -15  -2    3.94    0.57
  -6 -15  -2    3.98    0.49
  -7 -15  -2    0.73    0.37
  -7 -15  -2    1.48    0.48
   7  15   2    1.33    0.45
  -8 -15  -2   -0.21    0.40
  -8 -15  -2    0.75    0.34
   8  15   2   -0.43    0.38
  -3  16   2    0.60    0.45
  -2  16   2    1.72    0.51
   1 -16  -2    2.59    0.47
  -1  16   2    2.07    0.51
   0 -16  -2    0.31    0.38
   0  16   2    0.23    0.41
  -1 -16  -2   -0.08    0.37
   1  16   2    0.38    0.42
  -2 -16  -2    1.10    0.45
   2  16   2    1.49    0.45
  -3 -16  -2    2.37    0.50
   3  16   2    1.13    0.44
  -4 -16  -2    2.43    0.45
  -4 -16  -2    3.01    0.52
   4  16   2    2.33    0.49
  -5 -16  -2    0.93    0.45
  -5 -16  -2    1.03    0.37
   5  16   2    2.16    0.49
  -6 -16  -2   -0.61    0.38
  -6 -16  -2   -0.36    0.30
   6  16   2    0.21    0.40
  -7 -16  -2    0.78    0.37
  -7 -16  -2    0.40    0.44
   0 -17  -2    1.40    0.46
   0  17   2    1.66    0.50
  -1 -17  -2    2.20    0.50
   1  17   2    1.35    0.48
  -2 -17  -2    0.88    0.44
   2  17   2    0.01    0.42
  -3 -17  -2   -0.33    0.40
   3  17   2    0.11    0.40
  -4 -17  -2    0.11    0.42
   4  17   2    0.04    0.39
  -6 -14   3    0.06    0.42
  -6 -14   3    0.06    0.33
   5  14  -3    0.39    0.39
  -5 -14   3    0.20    0.43
  -5 -14   3   -0.18    0.32
   4  14  -3    2.08    0.48
  -4 -14   3    1.74    0.49
  -4 -14   3    2.15    0.43
   3  14  -3    2.33    0.50
  -3 -14   3    2.76    0.48
  -3 -14   3    1.98    0.46
   2  14  -3    1.08    0.43
  -2 -14   3    1.31    0.44
   1  14  -3    0.60    0.43
  -1 -14   3   -0.35    0.35
   0  14  -3    0.16    0.42
  -1  14  -3    1.21    0.47
  -2  14  -3    1.12    0.50
  -3  14  -3    0.08    0.46
   7  13  -3    0.99    0.42
  -7 -13   3    1.08    0.51
  -7 -13   3    0.88    0.36
   6  13  -3    0.92    0.42
  -6 -13   3    0.80    0.45
  -6 -13   3    1.32    0.39
   5  13  -3    1.46    0.43
  -5 -13   3    0.94    0.37
  -5 -13   3    1.04    0.46
   4  13  -3   -0.69    0.35
  -4 -13   3   -0.31    0.40
  -4 -13   3    0.57    0.34
   3  13  -3   -0.33    0.37
  -3 -13   3    0.24    0.33
  -3 -13   3   -0.22    0.35
   2  13  -3    1.13    0.42
  -2 -13   3    1.11    0.41
  -2 -13   3    1.73    0.42
   1  13  -3    3.25    0.51
  -1 -13   3    2.83    0.46
   0  13  -3    0.56    0.44
   0 -13   3    0.94    0.38
  -1  13  -3   -0.57    0.37
  -2  13  -3    0.60    0.40
  -3  13  -3    0.81    0.47
  -4  13  -3    0.33    0.46
  -5  13  -3    0.64    0.46
   9  12  -3    0.94    0.41
  -9 -12   3    0.67    0.47
  -9 -12   3    1.06    0.34
   8  12  -3    0.65    0.40
  -8 -12   3    1.15    0.48
  -8 -12   3    0.92    0.33
   7  12  -3   -0.09    0.35
  -7 -12   3   -0.57    0.37
  -7 -12   3    0.03    0.28
   6  12  -3    0.05    0.34
  -6 -12   3   -0.07    0.40
  -6 -12   3    0.34    0.30
   5  12  -3    1.43    0.40
  -5 -12   3    1.69    0.38
  -5 -12   3    2.87    0.51
   4  12  -3    3.72    0.51
  -4 -12   3    3.57    0.53
  -4 -12   3    3.64    0.47
   3  12  -3    1.49    0.40
  -3 -12   3    1.43    0.40
  -3 -12   3    1.21    0.37
   2  12  -3    0.12    0.34
  -2 -12   3    0.40    0.31
  -2 -12   3    0.84    0.36
   1  12  -3    1.26    0.43
  -1 -12   3    0.75    0.34
  -1 -12   3   -0.15    0.33
   0  12  -3    3.59    0.54
   0 -12   3    4.85    0.49
  -1  12  -3    3.08    0.51
  -2  12  -3    1.41    0.44
  -3  12  -3   -0.60    0.32
  -4  12  -3   -0.41    0.33
  -5  12  -3    0.41    0.43
  -6  12  -3    1.98    0.52
  10  11  -3   -0.11    0.36
 -10 -11   3    0.53    0.52
 -10 -11   3    0.40    0.27
   9  11  -3   -0.40    0.33
  -9 -11   3   -0.02    0.27
  -9 -11   3   -0.28    0.43
   8  11  -3    0.50    0.37
  -8 -11   3    0.57    0.48
  -8 -11   3    0.59    0.29
   7  11  -3    2.99    0.47
  -7 -11   3    2.68    0.52
  -7 -11   3    2.78    0.40
   6  11  -3    2.20    0.43
  -6 -11   3    2.95    0.50
  -6 -11   3    2.20    0.38
   5  11  -3    0.45    0.35
  -5 -11   3    0.17    0.29
  -5 -11   3    0.41    0.39
   4  11  -3    0.15    0.32
  -4 -11   3    0.43    0.39
  -4 -11   3    0.47    0.28
   3  11  -3    3.24    0.47
  -3 -11   3    3.84    0.45
  -3 -11   3    4.31    0.49
   2  11  -3    6.31    0.53
  -2 -11   3    5.72    0.48
  -2 -11   3    5.51    0.47
   1  11  -3    6.80    0.54
  -1 -11   3    6.94    0.50
  -1 -11   3    7.14    0.51
   0  11  -3    1.36    0.39
   0 -11   3    1.10    0.33
  -1  11  -3    0.48    0.37
   1 -11   3    0.13    0.29
  -2  11  -3    3.17    0.48
  -3  11  -3    3.15    0.51
  -4  11  -3    1.70    0.44
   4 -11   3    1.60    0.34
  -5  11  -3   -0.45    0.37
   5 -11   3   -0.12    0.28
  -6  11  -3    0.04    0.41
   6 -11   3    0.04    0.29
  -7  11  -3    1.35    0.46
   7 -11   3    1.08    0.37
  10  10  -3    1.79    0.42
 -10 -10   3    2.75    0.58
 -10 -10   3    1.22    0.32
   9  10  -3    2.38    0.44
  -9 -10   3    1.75    0.33
  -9 -10   3    2.22    0.53
   8  10  -3    1.37    0.39
  -8 -10   3    1.90    0.49
  -8 -10   3    0.98    0.31
   7  10  -3   -0.06    0.33
  -7 -10   3    0.08    0.38
  -7 -10   3    0.21    0.27
   6  10  -3    0.75    0.35
  -6 -10   3    1.24    0.41
  -6 -10   3    1.09    0.31
   5  10  -3    5.82    0.47
  -5 -10   3    6.71    0.56
  -5 -10   3    6.93    0.48
   4  10  -3    5.70    0.47
  -4 -10   3    6.88    0.55
  -4 -10   3    6.30    0.47
   3  10  -3    1.35    0.35
  -3 -10   3    1.05    0.36
  -3 -10   3    1.12    0.29
   2  10  -3    0.24    0.33
  -2 -10   3    0.13    0.32
  -2 -10   3   -0.08    0.26
   1  10  -3    6.61    0.55
  -1 -10   3    5.96    0.45
  -1 -10   3    6.91    0.48
   0  10  -3   11.32    0.64
   0 -10   3   12.05    0.57
   0 -10   3   10.87    0.59
  -1  10  -3    8.59    0.61
   1 -10   3   10.34    0.52
  -2  10  -3    0.46    0.35
   2 -10   3    1.20    0.30
   2 -10   3    1.17    0.27
  -3  10  -3    0.53    0.33
   3 -10   3    0.38    0.25
  -4  10  -3    1.98    0.37
  -4  10  -3    2.62    0.45
   4 -10   3    2.91    0.35
  -5  10  -3    4.42    0.54
  -5  10  -3    5.32    0.52
   5 -10   3    5.49    0.43
  -6  10  -3    4.03    0.55
  -6  10  -3    3.14    0.44
   6 -10   3    3.28    0.42
  -7  10  -3    1.46    0.47
  -7  10  -3    0.62    0.33
   7 -10   3    0.35    0.30
  -8  10  -3   -0.27    0.40
  -8  10  -3   -0.41    0.29
   8 -10   3   -0.43    0.28
  11   9  -3    0.79    0.39
 -11  -9   3    1.48    0.53
 -11  -9   3    0.96    0.28
  10   9  -3    0.22    0.34
 -10  -9   3   -0.08    0.46
 -10  -9   3    0.59    0.26
   9   9  -3    0.20    0.34
  -9  -9   3    0.28    0.26
  -9  -9   3    0.55    0.43
   8   9  -3    2.54    0.42
  -8  -9   3    1.56    0.30
  -8  -9   3    3.10    0.51
   7   9  -3    4.01    0.45
  -7  -9   3    3.97    0.38
  -7  -9   3    4.49    0.54
   6   9  -3    5.66    0.47
  -6  -9   3    6.03    0.54
  -6  -9   3    5.97    0.42
   5   9  -3    1.29    0.34
  -5  -9   3    0.73    0.25
  -5  -9   3    0.52    0.37
   4   9  -3    2.38    0.39
  -4  -9   3    2.26    0.31
  -4  -9   3    2.24    0.43
   3   9  -3    7.86    0.53
  -3  -9   3    6.72    0.44
  -3  -9   3    8.48    0.55
   2   9  -3    9.36    0.54
  -2  -9   3    9.07    0.52
  -2  -9   3    8.28    0.48
   1   9  -3    3.55    0.42
  -1  -9   3    4.86    0.40
  -1  -9   3    4.31    0.41
   0   9  -3    0.19    0.29
   0  -9   3    0.12    0.17
   0  -9   3    0.32    0.27
   0  -9   3    0.20    0.25
  -1   9  -3    5.92    0.50
   1  -9   3    5.85    0.41
   1  -9   3    6.11    0.34
   1  -9   3    6.17    0.44
  -2   9  -3   14.89    0.71
   2  -9   3   17.18    0.61
   2  -9   3   15.92    0.58
  -3   9  -3    9.51    0.58
  -3   9  -3    9.34    0.51
   3  -9   3    9.08    0.45
  -4   9  -3    2.41    0.36
  -4   9  -3    2.47    0.43
   4  -9   3    2.50    0.34
  -5   9  -3    0.36    0.27
  -5   9  -3   -0.21    0.34
   5  -9   3   -0.17    0.25
  -6   9  -3    1.28    0.40
  -6   9  -3    1.50    0.35
   6  -9   3    1.86    0.34
  -7   9  -3    3.50    0.54
  -7   9  -3    4.18    0.48
   7  -9   3    4.15    0.47
  -8   9  -3    2.89    0.49
  -8   9  -3    2.82    0.44
   8  -9   3    2.69    0.42
  -9   9  -3    1.38    0.46
  -9   9  -3    0.94    0.36
   9  -9   3    0.43    0.34
 -12  -8   3    0.06    0.20
 -12  -8   3    0.04    0.48
  11   8  -3    0.38    0.36
 -11  -8   3   -0.22    0.22
 -11  -8   3    0.36    0.45
  10   8  -3    2.27    0.42
 -10  -8   3    2.12    0.53
 -10  -8   3    1.65    0.29
   9   8  -3    1.66    0.38
  -9  -8   3    1.12    0.45
  -9  -8   3    1.16    0.27
   8   8  -3   -0.13    0.28
  -8  -8   3    0.14    0.38
  -8  -8   3    0.20    0.21
   7   8  -3    0.78    0.31
  -7  -8   3    0.56    0.38
  -7  -8   3    0.81    0.24
   6   8  -3    2.99    0.39
  -6  -8   3    3.03    0.33
  -6  -8   3    3.06    0.46
   5   8  -3   12.79    0.61
  -5  -8   3   13.69    0.68
  -5  -8   3   12.45    0.56
   4   8  -3   16.52    0.68
  -4  -8   3   13.36    0.58
  -4  -8   3   16.05    0.70
   3   8  -3    0.39    0.30
  -3  -8   3    0.06    0.29
  -3  -8   3   -0.02    0.22
   2   8  -3    1.97    0.34
  -2  -8   3    1.80    0.33
  -2  -8   3    1.69    0.30
   1   8  -3   13.27    0.62
  -1  -8   3   13.78    0.45
  -1  -8   3   14.11    0.59
  -1  -8   3   13.98    0.58
   0   8  -3   19.22    0.76
   0  -8   3   17.85    0.68
   0  -8   3   18.36    0.56
   0  -8   3   18.42    0.64
  -1   8  -3    3.38    0.41
  -1   8  -3    3.94    0.35
   1  -8   3    3.80    0.34
   1  -8   3    3.34    0.27
   1  -8   3    3.37    0.36
  -2   8  -3    0.10    0.29
  -2   8  -3    0.36    0.21
   2  -8   3    0.45    0.22
   2  -8   3    0.14    0.20
   2  -8   3    0.26    0.22
  -3   8  -3   10.62    0.52
  -3   8  -3   11.67    0.61
   3  -8   3   10.38    0.43
   3  -8   3   10.64    0.48
  -4   8  -3   10.39    0.61
  -4   8  -3   10.55    0.56
   4  -8   3   11.20    0.50
  -5   8  -3    9.68    0.55
  -5   8  -3   10.07    0.61
   5  -8   3    9.11    0.49
  -6   8  -3    6.86    0.48
  -6   8  -3    7.23    0.56
   6  -8   3    7.80    0.47
  -7   8  -3    0.65    0.39
  -7   8  -3    0.30    0.30
   7  -8   3    0.65    0.30
  -8   8  -3    0.58    0.32
  -8   8  -3    0.60    0.42
   8  -8   3    0.73    0.34
  -9   8  -3    2.42    0.47
  -9   8  -3    2.56    0.42
   9  -8   3    2.77    0.44
 -10   8  -3    2.40    0.43
 -10   8  -3    2.87    0.52
  10  -8   3    2.67    0.46
 -12  -7   3    0.48    0.21
 -12  -7   3    0.27    0.47
  11   7  -3    0.75    0.33
 -11  -7   3    0.25    0.21
 -11  -7   3    0.33    0.43
  10   7  -3    0.27    0.32
 -10  -7   3   -0.18    0.40
 -10  -7   3   -0.02    0.20
   9   7  -3    1.29    0.35
  -9  -7   3    1.93    0.46
  -9  -7   3    1.35    0.26
   8   7  -3    5.78    0.45
  -8  -7   3    6.68    0.58
  -8  -7   3    5.00    0.34
   7   7  -3    4.91    0.42
  -7  -7   3    5.95    0.57
  -7  -7   3    5.49    0.35
   6   7  -3    0.33    0.27
  -6  -7   3   -0.12    0.33
  -6  -7   3    0.29    0.21
   5   7  -3   -0.25    0.25
  -5  -7   3   -0.61    0.30
  -5  -7   3   -0.06    0.20
   4   7  -3   16.54    0.66
  -4  -7   3   17.73    0.72
  -4  -7   3   15.69    0.60
   3   7  -3   30.32    0.94
  -3  -7   3   30.08    0.72
  -3  -7   3   29.69    0.90
  -3  -7   3   30.84    0.97
   2   7  -3   18.75    0.69
  -2  -7   3   18.68    0.68
  -2  -7   3   18.44    0.66
  -2  -7   3   18.52    0.50
   1   7  -3    5.03    0.41
  -1  -7   3    5.55    0.36
  -1  -7   3    4.98    0.25
  -1  -7   3    5.00    0.36
   0   7  -3    2.10    0.31
   0   7  -3    2.67    0.27
   0  -7   3    2.87    0.24
   0  -7   3    2.35    0.29
   0  -7   3    2.32    0.30
  -1   7  -3   16.19    0.59
  -1   7  -3   16.95    0.66
   1  -7   3   17.29    0.58
   1  -7   3   17.56    0.54
   1  -7   3   16.96    0.63
  -2   7  -3   31.38    0.92
  -2   7  -3   28.87    0.94
   2  -7   3   29.96    0.83
   2  -7   3   31.34    0.94
   2  -7   3   29.34    0.83
  -3   7  -3    5.34    0.39
  -3   7  -3    6.33    0.46
   3  -7   3    5.36    0.31
   3  -7   3    5.43    0.36
  -4   7  -3    0.67    0.32
  -4   7  -3   -0.03    0.22
   4  -7   3    0.32    0.23
  -5   7  -3    1.23    0.36
  -5   7  -3    1.38    0.29
   5  -7   3    1.11    0.26
  -6   7  -3    5.64    0.47
  -6   7  -3    6.18    0.45
   6  -7   3    5.42    0.41
  -7   7  -3    7.24    0.48
  -7   7  -3    8.41    0.58
   7  -7   3    7.99    0.50
  -8   7  -3    4.52    0.46
  -8   7  -3    4.49    0.52
   8  -7   3    4.11    0.44
  -9   7  -3   -0.19    0.28
  -9   7  -3   -0.26    0.37
   9  -7   3    0.29    0.32
 -10   7  -3    0.17    0.40
 -10   7  -3    0.76    0.34
  10  -7   3    0.56    0.35
 -11   7  -3    1.62    0.38
 -11   7  -3    1.32    0.48
 -12  -6   3    0.30    0.42
 -12  -6   3   -0.21    0.16
  11   6  -3    1.22    0.36
 -11  -6   3    1.46    0.47
 -11  -6   3    0.73    0.20
  10   6  -3    1.28    0.35
 -10  -6   3    1.43    0.45
 -10  -6   3    0.97    0.21
   9   6  -3    0.64    0.30
  -9  -6   3    0.19    0.38
  -9  -6   3    0.39    0.19
   8   6  -3    0.18    0.31
   8   6  -3    0.18    0.26
  -8  -6   3    0.09    0.18
   7   6  -3    7.20    0.50
   7   6  -3    6.50    0.43
  -7  -6   3    6.82    0.36
   6   6  -3    9.44    0.48
   6   6  -3    9.46    0.54
  -6  -6   3    8.89    0.41
   5   6  -3   12.55    0.58
   5   6  -3   12.34    0.54
  -5  -6   3   12.81    0.38
  -5  -6   3   11.78    0.47
   4   6  -3    3.02    0.35
   4   6  -3    3.45    0.34
  -4  -6   3    2.91    0.28
  -4  -6   3    2.82    0.18
  -4  -6   3    2.87    0.36
   3   6  -3    3.40    0.34
  -3  -6   3    2.88    0.28
  -3  -6   3    2.35    0.34
  -3  -6   3    2.85    0.18
   2   6  -3   31.77    0.93
  -2  -6   3   30.86    0.88
  -2  -6   3   28.66    0.91
  -2  -6   3   30.61    0.73
   1   6  -3   57.91    1.39
   1   6  -3   57.53    1.49
  -1  -6   3   56.82    1.29
  -1  -6   3   55.53    1.44
  -1  -6   3   58.17    1.45
   0   6  -3   21.60    0.65
   0   6  -3   19.77    0.71
   0  -6   3   20.25    0.57
   0  -6   3   20.67    0.67
   0  -6   3   21.35    0.65
  -1   6  -3   10.07    0.44
  -1   6  -3   10.66    0.47
   1  -6   3   10.70    0.47
   1  -6   3   10.11    0.38
   1  -6   3    9.65    0.40
  -2   6  -3   13.13    0.51
  -2   6  -3   12.70    0.54
   2  -6   3   12.31    0.46
   2  -6   3   12.99    0.51
   2  -6   3   12.69    0.44
  -3   6  -3   50.22    1.32
  -3   6  -3   49.93    1.37
   3  -6   3   51.73    1.26
   3  -6   3   50.80    1.21
   3  -6   3   50.44    1.33
  -4   6  -3   16.66    0.67
  -4   6  -3   15.89    0.60
   4  -6   3   15.93    0.58
  -5   6  -3    9.26    0.48
  -5   6  -3   10.11    0.55
   5  -6   3    9.41    0.47
  -6   6  -3    1.52    0.34
  -6   6  -3    1.64    0.30
   6  -6   3    1.98    0.31
  -7   6  -3   -0.10    0.31
  -7   6  -3    0.04    0.23
   7  -6   3   -0.39    0.23
  -8   6  -3    5.70    0.45
  -8   6  -3    5.31    0.53
   8  -6   3    5.82    0.44
  -9   6  -3    8.11    0.53
  -9   6  -3    9.37    0.62
   9  -6   3    8.82    0.56
 -10   6  -3    1.75    0.35
 -10   6  -3    2.09    0.46
  10  -6   3    1.59    0.36
 -11   6  -3    0.09    0.39
 -11   6  -3    0.16    0.29
  11  -6   3    0.22    0.33
 -13  -5   3    0.73    0.14
 -13  -5   3    0.79    0.48
 -12  -5   3    0.18    0.15
 -12  -5   3   -0.30    0.42
  11   5  -3   -0.11    0.28
 -11  -5   3    0.10    0.15
 -11  -5   3   -0.44    0.39
  10   5  -3    2.55    0.41
  10   5  -3    2.04    0.36
 -10  -5   3    1.85    0.22
   9   5  -3    4.04    0.46
   9   5  -3    4.87    0.42
  -9  -5   3    4.29    0.27
   8   5  -3    6.56    0.51
   8   5  -3    6.32    0.42
  -8  -5   3    6.48    0.32
  -8  -5   3    5.92    0.36
   7   5  -3    2.42    0.32
   7   5  -3    1.78    0.35
  -7  -5   3    2.17    0.23
  -7  -5   3    1.73    0.24
   6   5  -3    0.13    0.22
   6   5  -3    0.24    0.29
  -6  -5   3    0.05    0.17
  -6  -5   3   -0.21    0.16
   5   5  -3   26.82    0.81
   5   5  -3   25.46    0.84
  -5  -5   3   25.55    0.73
  -5  -5   3   26.99    0.67
  -5  -5   3   26.62    0.71
   4   5  -3   65.35    1.62
   4   5  -3   64.06    1.65
  -4  -5   3   68.95    1.55
  -4  -5   3   64.93    1.57
  -4  -5   3   63.63    1.43
   3   5  -3   50.54    1.32
   3   5  -3   53.06    1.33
  -3  -5   3   52.16    1.15
  -3  -5   3   50.76    1.28
   2   5  -3   41.62    1.09
   2   5  -3   41.29    1.09
  -2  -5   3   40.88    1.06
  -2  -5   3   39.70    0.93
   1   5  -3    6.06    0.29
   1   5  -3    6.34    0.37
  -1  -5   3    5.56    0.32
  -1  -5   3    5.56    0.25
  -1  -5   3    5.39    0.34
   0   5  -3   36.34    0.94
   0   5  -3   36.15    1.00
   0  -5   3   36.05    0.98
   0  -5   3   36.14    0.87
   0  -5   3   35.10    0.94
  -1   5  -3   57.95    1.48
  -1   5  -3   59.62    1.43
   1  -5   3   59.89    1.40
   1  -5   3   59.22    1.36
   1  -5   3   57.46    1.45
  -2   5  -3  139.54    3.30
  -2   5  -3  147.32    3.25
   2  -5   3  145.75    3.26
   2  -5   3  140.44    3.17
   2  -5   3  146.70    3.11
  -3   5  -3   15.32    0.59
  -3   5  -3   15.35    0.55
   3  -5   3   14.94    0.44
   3  -5   3   15.69    0.55
   3  -5   3   14.26    0.51
  -4   5  -3    2.38    0.33
  -4   5  -3    1.57    0.24
   4  -5   3    1.81    0.17
   4  -5   3    1.59    0.25
  -5   5  -3    6.61    0.40
  -5   5  -3    7.69    0.47
   5  -5   3    6.30    0.39
  -6   5  -3    7.90    0.47
  -6   5  -3    7.39    0.41
   6  -5   3    7.76    0.44
  -7   5  -3    5.60    0.38
  -7   5  -3    5.69    0.44
   7  -5   3    5.14    0.41
  -8   5  -3    3.40    0.37
  -8   5  -3    3.53    0.43
   8  -5   3    4.17    0.42
  -9   5  -3   -0.35    0.23
  -9   5  -3   -0.39    0.32
   9  -5   3    0.18    0.29
 -10   5  -3    2.37    0.37
 -10   5  -3    2.69    0.46
  10  -5   3    2.27    0.39
 -11   5  -3    3.14    0.41
 -11   5  -3    2.47    0.48
  11  -5   3    2.53    0.43
 -12   5  -3    1.60    0.35
 -12   5  -3    1.24    0.44
 -13  -4   3    0.30    0.45
 -12  -4   3    1.77    0.49
  11   4  -3    3.96    0.42
  11   4  -3    3.24    0.46
 -11  -4   3    2.85    0.20
  10   4  -3    3.28    0.40
  10   4  -3    3.02    0.44
 -10  -4   3    2.92    0.21
 -10  -4   3    2.74    0.37
   9   4  -3   -0.26    0.29
   9   4  -3   -0.11    0.24
  -9  -4   3   -0.04    0.24
  -9  -4   3    0.07    0.14
   8   4  -3    3.83    0.43
   8   4  -3    4.97    0.37
  -8  -4   3    5.29    0.35
  -8  -4   3    4.65    0.24
  -8  -4   3    4.92    0.25
   7   4  -3   11.66    0.49
   7   4  -3   10.96    0.55
  -7  -4   3   11.85    0.37
  -7  -4   3   11.15    0.38
  -7  -4   3   10.35    0.43
   6   4  -3   28.60    0.91
   6   4  -3   29.33    0.85
  -6  -4   3   29.04    0.77
  -6  -4   3   29.68    0.76
  -6  -4   3   30.51    0.75
   5   4  -3   35.96    1.03
   5   4  -3   35.84    0.97
  -5  -4   3   36.14    0.88
  -5  -4   3   34.62    0.89
  -5  -4   3   37.37    0.89
   4   4  -3   -0.12    0.20
   4   4  -3    0.39    0.19
  -4  -4   3    0.16    0.13
  -4  -4   3    0.03    0.14
  -4  -4   3    0.12    0.13
   3   4  -3    8.22    0.38
   3   4  -3    7.97    0.38
  -3  -4   3    8.77    0.29
  -3  -4   3    8.29    0.32
  -3  -4   3    8.51    0.34
   2   4  -3   59.73    1.45
   2   4  -3   57.78    1.45
  -2  -4   3   58.64    1.30
  -2  -4   3   61.16    1.42
   1   4  -3  107.17    2.37
   1   4  -3  106.72    2.42
   1   4  -3  108.22    2.45
  -1  -4   3   99.43    2.41
  -1  -4   3  110.07    2.26
   0   4  -3   16.49    0.49
   0   4  -3   15.70    0.53
   0  -4   3   15.42    0.49
   0  -4   3   15.31    0.50
   0  -4   3   15.21    0.44
  -1   4  -3   14.73    0.49
  -1   4  -3   15.39    0.52
   1  -4   3   14.52    0.45
   1  -4   3   15.86    0.46
   1  -4   3   14.89    0.50
  -2   4  -3   13.09    0.48
  -2   4  -3   13.74    0.49
   2  -4   3   13.86    0.46
   2  -4   3   13.05    0.40
   2  -4   3   13.84    0.48
  -3   4  -3   95.38    2.25
  -3   4  -3   94.78    2.19
   3  -4   3   94.98    2.19
   3  -4   3   96.19    2.12
   3  -4   3   92.16    2.08
  -4   4  -3   37.03    1.05
  -4   4  -3   37.24    1.00
   4  -4   3   37.40    0.99
  -5   4  -3    1.80    0.29
  -5   4  -3    2.25    0.27
   5  -4   3    2.44    0.29
  -6   4  -3    0.44    0.22
  -6   4  -3    0.06    0.27
   6  -4   3    0.47    0.24
  -7   4  -3    1.76    0.28
  -7   4  -3    1.96    0.35
   7  -4   3    1.66    0.32
  -8   4  -3    7.23    0.43
  -8   4  -3    6.48    0.46
   8  -4   3    7.54    0.47
  -9   4  -3    8.00    0.47
  -9   4  -3    7.39    0.54
   9  -4   3    7.94    0.50
 -10   4  -3    1.75    0.32
 -10   4  -3    1.00    0.39
  10  -4   3    1.74    0.37
 -11   4  -3    0.01    0.36
 -11   4  -3   -0.21    0.25
  11  -4   3   -0.23    0.30
 -12   4  -3    1.93    0.46
 -12   4  -3    0.84    0.31
  12  -4   3    1.24    0.37
  12   3  -3   -0.14    0.33
  11   3  -3    1.02    0.33
  11   3  -3    0.95    0.35
 -11  -3   3    0.12    0.28
  10   3  -3    6.28    0.51
  10   3  -3    7.23    0.44
 -10  -3   3    7.08    0.43
 -10  -3   3    6.32    0.23
 -10  -3   3    5.69    0.23
   9   3  -3   12.98    0.61
   9   3  -3   14.07    0.57
  -9  -3   3   13.28    0.55
  -9  -3   3   12.74    0.36
  -9  -3   3   11.96    0.35
   8   3  -3    8.31    0.48
   8   3  -3    7.37    0.41
  -8  -3   3    7.68    0.26
  -8  -3   3    8.12    0.41
  -8  -3   3    7.54    0.26
   7   3  -3    1.52    0.26
   7   3  -3    0.93    0.30
  -7  -3   3    1.16    0.23
  -7  -3   3    1.08    0.14
  -7  -3   3    1.15    0.14
   6   3  -3   -0.54    0.22
   6   3  -3   -0.13    0.17
  -6  -3   3   -0.13    0.16
  -6  -3   3   -0.37    0.10
  -6  -3   3   -0.32    0.10
   5   3  -3   20.69    0.62
   5   3  -3   19.90    0.67
  -5  -3   3   21.01    0.53
  -5  -3   3   19.85    0.54
  -5  -3   3   21.14    0.59
   4   3  -3   99.83    2.24
   4   3  -3   94.53    2.26
  -4  -3   3   93.64    2.15
  -4  -3   3   98.40    2.10
  -4  -3   3   98.32    2.14
   3   3  -3   37.95    0.95
   3   3  -3   36.65    0.98
  -3  -3   3   38.02    0.89
  -3  -3   3   36.80    0.86
  -3  -3   3   35.80    0.90
   2   3  -3    4.49    0.27
   2   3  -3    4.16    0.28
  -2  -3   3    4.03    0.19
  -2  -3   3    4.43    0.23
   1   3  -3   40.68    1.01
   1   3  -3   40.09    0.96
   1   3  -3   39.88    1.00
  -1  -3   3   39.47    0.99
  -1  -3   3   41.91    0.92
   0   3  -3   71.20    1.61
   0   3  -3   69.76    1.65
   0   3  -3   71.26    1.62
   0  -3   3   70.28    1.64
   0  -3   3   70.77    1.54
  -1   3  -3   97.51    2.23
  -1   3  -3  100.46    2.20
   1  -3   3   97.02    2.16
   1  -3   3   96.10    2.21
   1  -3   3   95.39    2.10
  -2   3  -3   55.23    1.35
  -2   3  -3   54.26    1.32
   2  -3   3   53.49    1.24
   2  -3   3   57.17    1.33
   2  -3   3   55.91    1.28
  -3   3  -3   13.70    0.46
  -3   3  -3   13.81    0.50
   3  -3   3   14.32    0.46
   3  -3   3   13.61    0.36
   3  -3   3   14.22    0.47
  -4   3  -3   14.47    0.51
  -4   3  -3   15.82    0.57
   4  -3   3   15.79    0.52
  -5   3  -3   41.21    1.13
  -5   3  -3   41.08    1.08
   5  -3   3   41.07    1.07
  -6   3  -3   15.25    0.55
  -6   3  -3   15.27    0.60
   6  -3   3   14.34    0.56
  -7   3  -3    5.01    0.40
  -7   3  -3    5.25    0.35
   7  -3   3    5.37    0.39
  -8   3  -3    0.63    0.32
  -8   3  -3    0.18    0.21
   8  -3   3    0.20    0.25
  -9   3  -3    1.48    0.38
  -9   3  -3    1.29    0.27
   9  -3   3    1.88    0.35
 -10   3  -3    3.60    0.47
 -10   3  -3    2.84    0.35
  10  -3   3    3.07    0.42
 -11   3  -3    2.87    0.35
 -11   3  -3    3.35    0.49
  11  -3   3    3.37    0.45
 -12   3  -3    1.06    0.42
 -12   3  -3    0.86    0.28
  12  -3   3    0.19    0.35
 -13  -2   3    0.80    0.34
  12   2  -3    0.42    0.35
 -12  -2   3    0.72    0.33
  11   2  -3    4.42    0.42
  11   2  -3    2.93    0.42
 -11  -2   3    3.48    0.42
  10   2  -3    2.34    0.37
  10   2  -3    1.87    0.33
  10   2  -3    2.47    0.35
 -10  -2   3    2.82    0.37
   9   2  -3    1.58    0.28
   9   2  -3    1.54    0.29
   9   2  -3    1.35    0.32
  -9  -2   3    1.32    0.28
   8   2  -3   21.63    0.78
   8   2  -3   21.41    0.70
   8   2  -3   21.64    0.70
  -8  -2   3   21.69    0.71
   7   2  -3   34.64    1.03
   7   2  -3   36.52    0.98
  -7  -2   3   35.96    0.80
  -7  -2   3   36.72    0.96
   6   2  -3   16.34    0.60
   6   2  -3   16.31    0.53
  -6  -2   3   16.89    0.53
  -6  -2   3   16.91    0.41
  -6  -2   3   16.42    0.41
   5   2  -3   15.59    0.50
   5   2  -3   15.43    0.57
  -5  -2   3   16.13    0.40
  -5  -2   3   16.38    0.50
  -5  -2   3   16.51    0.41
   4   2  -3   -0.07    0.19
   4   2  -3    0.37    0.14
  -4  -2   3    0.43    0.10
  -4  -2   3    0.78    0.15
  -4  -2   3    0.36    0.10
   3   2  -3   29.69    0.76
   3   2  -3   29.56    0.80
  -3  -2   3   29.84    0.71
  -3  -2   3   28.94    0.71
  -3  -2   3   30.55    0.72
   2   2  -3  132.67    2.94
   2   2  -3  135.24    2.96
  -2  -2   3  128.04    2.78
  -2  -2   3  135.33    2.89
  -2  -2   3  132.11    2.90
   1   2  -3   79.86    1.79
   1   2  -3   80.19    1.75
   1   2  -3   80.84    1.79
  -1  -2   3   77.67    1.77
  -1  -2   3   74.67    1.68
   0   2  -3   26.67    0.69
   0   2  -3   26.86    0.67
   0   2  -3   27.44    0.67
   0  -2   3   25.64    0.63
   0  -2   3   26.83    0.69
  -1   2  -3    3.54    0.21
  -1   2  -3    3.83    0.22
  -1   2  -3    3.61    0.18
   1  -2   3    3.39    0.19
   1  -2   3    3.25    0.21
  -2   2  -3   24.46    0.67
  -2   2  -3   24.57    0.65
   2  -2   3   25.75    0.66
   2  -2   3   24.37    0.57
   2  -2   3   21.31    0.61
  -3   2  -3   47.66    1.21
  -3   2  -3   48.31    1.17
   3  -2   3   48.31    1.15
   3  -2   3   49.84    1.16
  -4   2  -3   14.01    0.51
  -4   2  -3   13.84    0.46
   4  -2   3   13.06    0.47
  -5   2  -3    2.58    0.24
  -5   2  -3    2.78    0.30
   5  -2   3    2.83    0.28
  -6   2  -3   24.93    0.73
  -6   2  -3   26.56    0.82
   6  -2   3   24.55    0.76
  -7   2  -3   20.03    0.65
  -7   2  -3   21.49    0.76
   7  -2   3   20.27    0.70
  -8   2  -3   14.34    0.63
  -8   2  -3   13.91    0.53
   8  -2   3   14.40    0.61
  -9   2  -3    4.68    0.35
  -9   2  -3    5.27    0.50
   9  -2   3    4.75    0.41
 -10   2  -3    0.20    0.22
 -10   2  -3    0.01    0.34
  10  -2   3    0.00    0.27
 -11   2  -3    0.49    0.39
 -11   2  -3    0.45    0.25
  11  -2   3    0.60    0.32
 -12   2  -3    2.05    0.47
 -12   2  -3    2.15    0.33
  12  -2   3    1.49    0.37
 -13   2  -3    1.77    0.32
 -13   2  -3    2.34    0.48
  13  -2   3    1.35    0.38
 -13  -1   3    0.31    0.33
  12   1  -3    0.06    0.28
 -12  -1   3    0.32    0.11
  11   1  -3    1.67    0.35
  11   1  -3    1.84    0.37
 -11  -1   3    1.35    0.14
 -11  -1   3    1.10    0.12
 -11  -1   3    1.73    0.41
  10   1  -3    7.27    0.46
  10   1  -3    7.56    0.49
  10   1  -3    6.64    0.42
   9   1  -3    8.43    0.49
   9   1  -3    6.71    0.41
   9   1  -3    8.07    0.42
   8   1  -3    4.80    0.35
   8   1  -3    5.28    0.42
   8   1  -3    4.95    0.35
   7   1  -3    3.84    0.35
   7   1  -3    3.26    0.28
   7   1  -3    3.60    0.31
   6   1  -3   27.58    0.83
   6   1  -3   28.96    0.78
   6   1  -3   28.08    0.77
   5   1  -3   69.17    1.58
   5   1  -3   69.51    1.62
   5   1  -3   67.53    1.67
  -5  -1   3   69.28    1.50
  -5  -1   3   69.41    1.49
  -5  -1   3   71.35    1.59
   4   1  -3  107.68    2.43
   4   1  -3  107.43    2.48
  -4  -1   3  109.62    2.34
  -4  -1   3  111.22    2.34
  -4  -1   3  108.03    2.35
   3   1  -3   54.84    1.34
   3   1  -3   57.19    1.29
  -3  -1   3   57.42    1.26
  -3  -1   3   55.68    1.24
  -3  -1   3   55.94    1.25
   2   1  -3   14.67    0.40
   2   1  -3   14.02    0.44
  -2  -1   3   14.36    0.38
  -2  -1   3   13.81    0.38
  -2  -1   3   15.22    0.40
   1   1  -3  227.06    4.79
   1   1  -3  224.91    4.78
   1   1  -3  220.98    4.73
  -1  -1   3  220.74    4.56
  -1  -1   3  210.73    4.74
   0   1  -3  126.87    2.75
   0   1  -3  123.98    2.77
   0   1  -3  127.86    2.75
   0  -1   3  125.43    2.64
   0  -1   3  125.41    2.75
  -1   1  -3   81.04    1.75
  -1   1  -3   76.19    1.80
  -1   1  -3   81.37    1.79
   1  -1   3   80.09    1.72
   1  -1   3   81.22    1.79
  -2   1  -3   81.41    1.89
  -2   1  -3   82.59    1.86
  -2   1  -3   80.54    1.78
   2  -1   3   82.71    1.80
   2  -1   3   85.92    1.86
  -3   1  -3   39.19    0.95
  -3   1  -3   37.70    0.99
   3  -1   3   39.89    0.94
  -4   1  -3   27.12    0.78
  -4   1  -3   26.74    0.72
   4  -1   3   28.30    0.74
  -5   1  -3   47.70    1.13
  -5   1  -3   45.19    1.12
  -5   1  -3   46.41    1.22
   5  -1   3   44.60    1.14
  -6   1  -3   25.72    0.82
  -6   1  -3   26.43    0.74
  -6   1  -3   28.56    0.75
   6  -1   3   26.74    0.79
  -7   1  -3    0.52    0.28
  -7   1  -3    0.40    0.19
   7  -1   3    0.17    0.22
  -8   1  -3    4.43    0.44
  -8   1  -3    3.67    0.30
   8  -1   3    5.30    0.43
  -9   1  -3   16.17    0.71
  -9   1  -3   14.82    0.57
   9  -1   3   15.75    0.64
 -10   1  -3    9.62    0.60
 -10   1  -3    9.65    0.45
  10  -1   3    9.08    0.53
 -11   1  -3    3.68    0.50
 -11   1  -3    3.18    0.33
  11  -1   3    3.97    0.44
 -12   1  -3    0.22    0.24
 -12   1  -3    0.05    0.39
  12  -1   3    0.41    0.34
 -13   1  -3   -0.12    0.24
 -13   1  -3   -0.24    0.38
  13  -1   3   -0.03    0.33
  13   0  -3    1.26    0.36
 -13   0   3    1.28    0.18
  12   0  -3    0.60    0.33
 -12   0   3    1.11    0.16
  11   0  -3    2.44    0.38
  11   0  -3    2.49    0.38
 -11   0   3    2.32    0.18
 -11   0   3    2.57    0.42
  10   0  -3   -0.12    0.28
  10   0  -3    0.20    0.27
 -10   0   3    0.25    0.30
 -10   0   3    0.13    0.12
 -10   0   3    0.38    0.12
   9   0  -3    3.03    0.37
   9   0  -3    2.92    0.35
  -9   0   3    2.72    0.15
  -9   0   3    2.76    0.16
  -9   0   3    2.59    0.36
   8   0  -3   37.08    1.07
   8   0  -3   39.12    1.04
   8   0  -3   36.81    1.04
  -8   0   3   38.65    0.84
  -8   0   3   36.94    0.84
   7   0  -3   51.98    1.36
   7   0  -3   53.20    1.32
   7   0  -3   52.78    1.32
   6   0  -3   10.07    0.38
   6   0  -3    9.77    0.44
   6   0  -3   10.11    0.41
   5   0  -3    1.76    0.22
   5   0  -3    1.33    0.23
   5   0  -3    1.66    0.19
   4   0  -3   46.89    1.12
   4   0  -3   48.40    1.12
   4   0  -3   47.98    1.18
  -4   0   3   47.62    1.04
  -4   0   3   48.20    1.04
   3   0  -3   32.40    0.76
   3   0  -3   31.90    0.83
  -3   0   3   32.01    0.73
  -3   0   3   32.44    0.78
  -3   0   3   33.02    0.73
   2   0  -3   94.40    2.04
   2   0  -3   90.89    2.09
  -2   0   3   92.90    2.03
  -2   0   3   94.07    2.00
  -2   0   3   94.74    2.03
   1   0  -3  239.71    5.24
   1   0  -3  242.63    5.27
  -1   0   3  246.78    5.02
  -1   0   3  243.06    5.19
   0   0  -3    2.32    0.15
   0   0  -3    2.59    0.14
   0   0  -3    2.26    0.15
   0   0   3    2.44    0.15
   0   0   3    2.35    0.14
  -1   0  -3    3.32    0.18
  -1   0  -3    3.21    0.14
  -1   0  -3    3.14    0.17
   1   0   3    3.20    0.16
   1   0   3    3.48    0.17
  -2   0  -3  252.27    5.55
  -2   0  -3  254.60    5.47
  -2   0  -3  248.66    5.44
   2   0   3  258.32    5.46
   2   0   3  259.80    5.27
  -3   0  -3  135.50    3.13
  -3   0  -3  142.66    3.06
   3   0   3  141.48    2.97
  -4   0  -3    0.04    0.12
  -4   0  -3   -0.01    0.12
  -4   0  -3   -0.08    0.18
   4   0   3    0.08    0.15
  -5   0  -3   15.98    0.39
  -5   0  -3   15.50    0.56
  -5   0  -3   15.88    0.48
  -5   0  -3   17.15    0.48
   5   0   3   16.69    0.53
  -6   0  -3   35.53    0.91
  -6   0  -3   34.33    1.01
  -6   0  -3   37.62    0.92
  -6   0  -3   36.82    0.82
   6   0   3   36.02    0.96
  -7   0  -3   25.43    0.72
  -7   0  -3   26.31    0.86
  -7   0  -3   26.93    0.72
   7   0   3   25.67    0.78
  -8   0  -3   15.74    0.65
  -8   0  -3   15.47    0.52
   8   0   3   14.91    0.59
  -9   0  -3    1.32    0.35
  -9   0  -3    1.83    0.25
   9   0   3    2.24    0.33
 -10   0  -3    0.54    0.23
 -10   0  -3    0.98    0.39
  10   0   3    0.91    0.31
 -11   0  -3    3.31    0.32
 -11   0  -3    3.76    0.48
  11   0   3    3.56    0.42
 -12   0  -3    4.12    0.54
 -12   0  -3    3.02    0.33
  12   0   3    4.31    0.48
 -13   0  -3    1.54    0.28
 -13   0  -3    1.42    0.46
  13   0   3    1.73    0.39
  13  -1  -3   -0.04    0.32
 -13   1   3    0.04    0.17
  12  -1  -3    0.88    0.35
 -12   1   3    0.67    0.18
  11  -1  -3    3.41    0.39
  11  -1  -3    2.65    0.39
 -11   1   3    2.44    0.22
  10  -1  -3    5.40    0.41
  10  -1  -3    4.86    0.45
 -10   1   3    4.98    0.44
 -10   1   3    4.61    0.24
   9  -1  -3    8.54    0.47
   9  -1  -3    7.82    0.47
  -9   1   3    7.12    0.29
  -9   1   3    7.85    0.28
  -9   1   3    7.58    0.43
   8  -1  -3    4.83    0.39
   8  -1  -3    5.00    0.37
  -8   1   3    5.08    0.21
  -8   1   3    4.74    0.22
  -8   1   3    5.22    0.39
   7  -1  -3    3.02    0.32
   7  -1  -3    3.30    0.29
  -7   1   3    2.82    0.15
  -7   1   3    2.75    0.16
  -7   1   3    3.21    0.31
   6  -1  -3   25.09    0.68
   6  -1  -3   24.08    0.72
   6  -1  -3   24.27    0.71
  -6   1   3   24.39    0.57
  -6   1   3   24.38    0.58
  -6   1   3   25.29    0.71
   5  -1  -3   97.29    2.17
   5  -1  -3   98.88    2.20
   5  -1  -3   94.99    2.24
  -5   1   3   97.88    2.11
  -5   1   3   98.46    2.10
   4  -1  -3   25.37    0.67
   4  -1  -3   25.51    0.64
   4  -1  -3   25.06    0.70
  -4   1   3   25.46    0.59
  -4   1   3   25.98    0.59
   3  -1  -3    9.67    0.33
   3  -1  -3    9.79    0.35
   3  -1  -3   10.16    0.28
  -3   1   3    9.51    0.26
  -3   1   3    9.52    0.27
   2  -1  -3  112.54    2.36
   2  -1  -3  105.28    2.42
  -2   1   3  109.89    2.37
  -2   1   3  107.08    2.33
  -2   1   3  112.79    2.38
   1  -1  -3  679.51   14.63
  -1   1   3  688.85   14.67
  -1   1   3  679.16   14.21
   0  -1  -3    0.17    0.09
   0  -1  -3    0.25    0.10
   0  -1  -3    0.35    0.08
   0   1   3    0.20    0.08
   0   1   3    0.14    0.09
  -1  -1  -3   66.39    1.44
  -1  -1  -3   63.82    1.47
  -1  -1  -3   66.43    1.46
   1   1   3   64.64    1.45
   1   1   3   64.97    1.40
  -2  -1  -3   19.64    0.47
  -2  -1  -3   19.66    0.51
   2   1   3   19.72    0.53
   2   1   3   18.39    0.49
   2   1   3   19.49    0.49
  -3  -1  -3   81.27    1.81
  -3  -1  -3   82.10    1.85
  -3  -1  -3   84.85    1.84
   3   1   3   84.11    1.80
   3   1   3   83.07    1.90
  -4  -1  -3  138.55    3.06
  -4  -1  -3  135.80    3.02
  -4  -1  -3  145.44    3.06
   4   1   3  140.01    2.99
   4   1   3  140.20    3.15
  -5  -1  -3   84.19    2.07
  -5  -1  -3   87.40    1.92
  -5  -1  -3   85.76    1.95
  -5  -1  -3   90.00    1.95
   5   1   3   87.37    1.95
   5   1   3   88.16    2.07
  -6  -1  -3   11.80    0.51
  -6  -1  -3   11.54    0.36
  -6  -1  -3   11.86    0.38
  -6  -1  -3   11.55    0.39
   6   1   3   11.93    0.44
  -7  -1  -3    0.33    0.24
  -7  -1  -3    0.26    0.16
  -7  -1  -3    0.39    0.15
  -7  -1  -3    0.49    0.15
   7   1   3    0.53    0.21
  -8  -1  -3    8.37    0.52
  -8  -1  -3    7.12    0.33
   8   1   3    8.63    0.45
  -9  -1  -3   22.83    0.68
  -9  -1  -3   24.59    0.90
   9   1   3   23.51    0.78
 -10  -1  -3    8.27    0.40
 -10  -1  -3   10.00    0.60
  10   1   3   10.22    0.53
 -11  -1  -3    1.15    0.42
 -11  -1  -3    1.24    0.23
  11   1   3    1.24    0.32
 -12  -1  -3    0.03    0.39
 -12  -1  -3    0.19    0.22
  12   1   3    0.46    0.33
 -13  -1  -3    0.20    0.23
 -13  -1  -3   -0.16    0.39
  13   1   3    0.22    0.35
  13  -2  -3    2.16    0.44
 -13   2   3    1.73    0.25
  12  -2  -3    1.18    0.38
 -12   2   3    0.85    0.21
  11  -2  -3    0.65    0.33
 -11   2   3    0.42    0.18
  10  -2  -3    0.39    0.29
  10  -2  -3    0.09    0.26
 -10   2   3   -0.17    0.16
 -10   2   3    0.28    0.30
   9  -2  -3    4.44    0.38
   9  -2  -3    5.29    0.39
  -9   2   3    4.75    0.27
  -9   2   3    5.48    0.40
   8  -2  -3   28.93    0.89
   8  -2  -3   27.80    0.87
  -8   2   3   30.09    0.88
  -8   2   3   28.57    0.75
  -8   2   3   29.57    0.74
   7  -2  -3   32.14    0.92
   7  -2  -3   32.95    0.93
  -7   2   3   33.09    0.81
  -7   2   3   33.15    0.92
  -7   2   3   32.97    0.80
   6  -2  -3    9.35    0.42
   6  -2  -3    9.86    0.42
  -6   2   3    9.99    0.31
  -6   2   3    9.96    0.32
  -6   2   3   10.12    0.40
   5  -2  -3   11.43    0.44
   5  -2  -3   12.83    0.45
  -5   2   3   12.16    0.34
  -5   2   3   12.22    0.42
  -5   2   3   12.66    0.36
   4  -2  -3   76.40    1.81
   4  -2  -3   78.93    1.76
  -4   2   3   78.13    1.72
  -4   2   3   81.22    1.78
  -4   2   3   77.62    1.73
   3  -2  -3   54.80    1.27
   3  -2  -3   55.71    1.31
  -3   2   3   56.09    1.26
  -3   2   3   57.37    1.26
  -3   2   3   56.28    1.25
   2  -2  -3   98.71    2.21
   2  -2  -3  100.74    2.13
  -2   2   3   98.12    2.16
  -2   2   3  101.17    2.13
  -2   2   3   97.98    2.14
   1  -2  -3   21.27    0.52
   1  -2  -3   19.56    0.53
  -1   2   3   20.77    0.51
  -1   2   3   21.07    0.46
  -1   2   3   20.50    0.51
   0  -2  -3   76.39    1.70
   0  -2  -3   76.17    1.71
   0   2   3   75.49    1.68
   0   2   3   79.71    1.67
   0   2   3   74.59    1.62
  -1  -2  -3    5.33    0.21
  -1  -2  -3    5.81    0.22
   1   2   3    5.23    0.19
   1   2   3    5.25    0.19
   1   2   3    5.45    0.20
  -2  -2  -3  448.02    9.67
  -2  -2  -3  441.56    9.68
   2   2   3  450.13    9.32
  -3  -2  -3   80.80    1.80
  -3  -2  -3   79.77    1.81
  -3  -2  -3   81.94    1.80
   3   2   3   80.76    1.87
   3   2   3   84.63    1.76
  -4  -2  -3   -0.14    0.10
  -4  -2  -3   -0.03    0.10
  -4  -2  -3   -0.01    0.12
   4   2   3   -0.18    0.15
   4   2   3    0.03    0.13
  -5  -2  -3   76.40    1.67
  -5  -2  -3   74.32    1.68
  -5  -2  -3   73.47    1.68
   5   2   3   72.71    1.79
   5   2   3   75.86    1.68
  -6  -2  -3   53.09    1.23
  -6  -2  -3   53.93    1.22
  -6  -2  -3   52.42    1.24
   6   2   3   51.43    1.35
   6   2   3   52.57    1.26
  -7  -2  -3   10.13    0.35
  -7  -2  -3   10.25    0.38
  -7  -2  -3   10.23    0.34
   7   2   3   10.03    0.41
   7   2   3    9.50    0.46
  -8  -2  -3    9.58    0.35
  -8  -2  -3    9.20    0.39
  -8  -2  -3    8.82    0.35
   8   2   3    9.34    0.48
   8   2   3    8.40    0.41
  -9  -2  -3   -0.09    0.32
  -9  -2  -3    0.23    0.17
   9   2   3   -0.20    0.24
 -10  -2  -3    2.10    0.24
 -10  -2  -3    2.01    0.43
  10   2   3    2.38    0.34
 -11  -2  -3    6.10    0.35
 -11  -2  -3    7.02    0.58
  11   2   3    7.00    0.46
 -12  -2  -3    2.48    0.28
 -12  -2  -3    2.19    0.49
  12   2   3    3.93    0.46
 -13  -2  -3   -0.20    0.40
 -13  -2  -3    0.53    0.22
  13   2   3   -0.01    0.31
  13  -3  -3    0.06    0.35
 -13   3   3   -0.01    0.22
  12  -3  -3    1.28    0.38
 -12   3   3    1.39    0.25
  11  -3  -3    3.97    0.45
 -11   3   3    3.39    0.31
  10  -3  -3    2.19    0.35
 -10   3   3    1.97    0.24
 -10   3   3    2.31    0.37
   9  -3  -3    3.69    0.36
   9  -3  -3    2.65    0.36
  -9   3   3    2.52    0.34
  -9   3   3    2.31    0.24
   8  -3  -3    0.26    0.25
   8  -3  -3    0.07    0.25
  -8   3   3   -0.16    0.24
  -8   3   3    0.10    0.16
   7  -3  -3    5.20    0.34
   7  -3  -3    5.30    0.36
  -7   3   3    5.29    0.28
  -7   3   3    5.22    0.26
  -7   3   3    3.99    0.33
   6  -3  -3   29.35    0.80
   6  -3  -3   27.15    0.80
  -6   3   3   29.03    0.78
  -6   3   3   27.24    0.73
  -6   3   3   28.19    0.72
   5  -3  -3   67.92    1.61
   5  -3  -3   67.85    1.58
  -5   3   3   67.05    1.58
  -5   3   3   67.85    1.55
  -5   3   3   68.09    1.54
   4  -3  -3   21.07    0.61
   4  -3  -3   22.47    0.62
  -4   3   3   21.79    0.58
  -4   3   3   22.10    0.58
  -4   3   3   22.13    0.56
   3  -3  -3   -0.13    0.12
   3  -3  -3    0.00    0.14
  -3   3   3    0.03    0.10
  -3   3   3    0.06    0.11
  -3   3   3    0.02    0.11
   2  -3  -3  127.12    2.80
   2  -3  -3  126.40    2.68
  -2   3   3  126.63    2.75
  -2   3   3  125.70    2.75
   1  -3  -3   19.57    0.52
   1  -3  -3   19.02    0.54
  -1   3   3   19.79    0.47
  -1   3   3   19.48    0.50
  -1   3   3   20.15    0.51
   0  -3  -3  338.53    7.43
   0  -3  -3  350.84    7.39
   0   3   3  342.05    7.09
   0   3   3  346.23    7.43
   0   3   3  351.72    7.50
  -1  -3  -3  191.66    4.24
  -1  -3  -3  190.36    4.22
   1   3   3  197.63    4.24
   1   3   3  202.69    4.20
   1   3   3  194.93    4.03
  -2  -3  -3  112.73    2.48
  -2  -3  -3  112.34    2.49
   2   3   3  112.79    2.52
   2   3   3  114.79    2.36
  -3  -3  -3  209.95    4.70
  -3  -3  -3  217.09    4.65
  -3  -3  -3  216.47    4.67
   3   3   3  219.65    4.76
   3   3   3  221.87    4.49
  -4  -3  -3  267.12    5.58
  -4  -3  -3  258.03    5.60
  -4  -3  -3  256.01    5.64
   4   3   3  261.58    5.73
   4   3   3  261.44    5.41
  -5  -3  -3  114.44    2.59
  -5  -3  -3  123.42    2.58
  -5  -3  -3  115.41    2.63
   5   3   3  115.89    2.71
   5   3   3  119.44    2.54
  -6  -3  -3    0.65    0.14
  -6  -3  -3    0.50    0.19
  -6  -3  -3    0.51    0.13
   6   3   3    0.82    0.23
   6   3   3    0.64    0.19
  -7  -3  -3    6.86    0.29
  -7  -3  -3    6.99    0.27
  -7  -3  -3    6.57    0.34
   7   3   3    6.13    0.32
   7   3   3    6.85    0.42
  -8  -3  -3   24.00    0.72
  -8  -3  -3   24.60    0.67
  -8  -3  -3   25.02    0.65
   8   3   3   23.30    0.72
   8   3   3   24.23    0.83
  -9  -3  -3   19.60    0.58
  -9  -3  -3   19.01    0.64
   9   3   3   20.31    0.68
   9   3   3   19.99    0.76
 -10  -3  -3    7.57    0.54
 -10  -3  -3    6.95    0.33
  10   3   3    7.66    0.49
  10   3   3    7.70    0.45
 -11  -3  -3   -0.23    0.17
 -11  -3  -3   -0.12    0.38
  11   3   3   -0.37    0.24
 -12  -3  -3    1.08    0.45
 -12  -3  -3    1.74    0.25
  12   3   3    2.05    0.38
 -13  -3  -3    0.92    0.44
 -13  -3  -3    0.75    0.22
  13   3   3    0.25    0.32
  13  -4  -3    0.32    0.36
 -13   4   3    0.80    0.25
  12  -4  -3    0.38    0.31
 -12   4   3    0.87    0.24
  11  -4  -3    0.30    0.31
 -11   4   3    0.10    0.21
  10  -4  -3    2.07    0.37
 -10   4   3    1.70    0.26
 -10   4   3    2.46    0.37
   9  -4  -3    3.17    0.40
   9  -4  -3    4.40    0.37
  -9   4   3    4.70    0.39
  -9   4   3    3.44    0.30
   8  -4  -3   10.45    0.52
   8  -4  -3   10.81    0.47
  -8   4   3   10.10    0.42
  -8   4   3   10.43    0.49
   7  -4  -3    4.48    0.33
   7  -4  -3    4.47    0.35
  -7   4   3    4.28    0.33
  -7   4   3    5.05    0.28
   6  -4  -3    1.26    0.23
   6  -4  -3    1.26    0.23
  -6   4   3    1.83    0.21
  -6   4   3    1.39    0.18
  -6   4   3    1.74    0.24
   5  -4  -3   41.16    1.05
   5  -4  -3   42.42    1.06
  -5   4   3   41.24    1.03
  -5   4   3   41.11    1.04
  -5   4   3   41.62    1.01
   4  -4  -3   92.65    2.06
   4  -4  -3   93.63    2.12
  -4   4   3   91.18    2.09
  -4   4   3   91.90    2.09
  -4   4   3   93.02    2.07
   3  -4  -3  107.51    2.34
   3  -4  -3  107.23    2.43
  -3   4   3  107.77    2.38
  -3   4   3  107.88    2.39
   2  -4  -3   20.13    0.53
   2  -4  -3   19.24    0.57
  -2   4   3   20.21    0.53
  -2   4   3   19.95    0.51
   1  -4  -3  162.92    3.45
   1  -4  -3  169.45    3.61
   1  -4  -3  164.65    3.63
  -1   4   3  163.82    3.59
  -1   4   3  165.22    3.60
   0  -4  -3  140.49    3.17
   0  -4  -3  146.08    3.16
   0   4   3  144.45    3.16
   0   4   3  145.20    3.14
   0   4   3  144.43    3.00
  -1  -4  -3   17.33    0.49
  -1  -4  -3   17.02    0.48
   1   4   3   17.52    0.46
   1   4   3   17.14    0.42
   1   4   3   17.41    0.48
  -2  -4  -3  123.53    2.75
  -2  -4  -3  124.04    2.78
   2   4   3  126.86    2.60
   2   4   3  126.82    2.79
  -3  -4  -3   28.18    0.75
  -3  -4  -3   29.40    0.70
  -3  -4  -3   27.95    0.72
   3   4   3   29.29    0.77
   3   4   3   30.56    0.67
  -4  -4  -3   27.10    0.68
  -4  -4  -3   27.55    0.66
  -4  -4  -3   26.66    0.73
   4   4   3   27.25    0.66
   4   4   3   26.55    0.76
  -5  -4  -3  162.40    3.63
  -5  -4  -3  164.14    3.57
  -5  -4  -3  164.96    3.55
   5   4   3  164.77    3.45
   5   4   3  162.62    3.70
  -6  -4  -3   76.22    1.81
  -6  -4  -3   75.48    1.74
  -6  -4  -3   79.52    1.72
   6   4   3   76.89    1.72
   6   4   3   74.89    1.87
  -7  -4  -3   30.62    0.75
  -7  -4  -3   30.24    0.85
  -7  -4  -3   29.44    0.77
   7   4   3   30.31    0.81
   7   4   3   30.90    0.93
  -8  -4  -3    3.65    0.34
  -8  -4  -3    2.91    0.22
  -8  -4  -3    3.31    0.24
   8   4   3    3.47    0.30
   8   4   3    2.85    0.38
  -9  -4  -3   -0.20    0.16
  -9  -4  -3   -0.54    0.24
   9   4   3   -0.42    0.20
   9   4   3    0.23    0.30
 -10  -4  -3    2.93    0.25
  10   4   3    3.36    0.43
  10   4   3    3.85    0.38
 -11  -4  -3    8.27    0.38
  11   4   3    8.49    0.54
  11   4   3    8.77    0.49
 -12  -4  -3    1.86    0.25
 -12  -4  -3    2.76    0.52
  12   4   3    2.33    0.38
 -13  -4  -3   -0.16    0.40
 -13  -4  -3    0.06    0.20
  12  -5  -3    1.61    0.40
 -12   5   3    0.85    0.26
  11  -5  -3    1.59    0.38
 -11   5   3    2.29    0.31
  10  -5  -3    0.26    0.30
 -10   5   3    0.37    0.32
 -10   5   3    0.76    0.25
   9  -5  -3   -0.12    0.25
  -9   5   3    0.22    0.28
  -9   5   3    0.13    0.21
   8  -5  -3    2.94    0.31
   8  -5  -3    2.57    0.35
  -8   5   3    1.97    0.27
  -8   5   3    3.06    0.34
   7  -5  -3   17.95    0.60
   7  -5  -3   17.58    0.66
  -7   5   3   18.05    0.60
  -7   5   3   18.30    0.62
   6  -5  -3   39.31    1.03
   6  -5  -3   39.01    1.06
  -6   5   3   39.29    1.04
  -6   5   3   39.28    1.01
   5  -5  -3   19.90    0.61
   5  -5  -3   19.01    0.62
  -5   5   3   19.17    0.60
  -5   5   3   19.75    0.59
  -5   5   3   20.40    0.59
   4  -5  -3    0.54    0.19
   4  -5  -3    0.77    0.20
  -4   5   3    0.77    0.16
  -4   5   3    0.63    0.18
   3  -5  -3   32.49    0.85
   3  -5  -3   31.86    0.81
  -3   5   3   30.59    0.81
  -3   5   3   32.21    0.81
   2  -5  -3  208.65    4.43
   2  -5  -3  202.99    4.25
   2  -5  -3  202.07    4.46
  -2   5   3  200.28    4.44
  -2   5   3  200.95    4.41
   1  -5  -3  156.63    3.47
   1  -5  -3  158.50    3.49
   1  -5  -3  157.51    3.30
  -1   5   3  156.67    3.45
  -1   5   3  158.77    3.47
   0  -5  -3    5.16    0.27
   0  -5  -3    5.50    0.29
   0   5   3    5.82    0.26
   0   5   3    5.46    0.21
   0   5   3    5.22    0.24
  -1  -5  -3   28.10    0.75
  -1  -5  -3   27.93    0.74
   1   5   3   28.73    0.64
   1   5   3   28.52    0.74
   1   5   3   28.48    0.72
  -2  -5  -3   21.51    0.62
  -2  -5  -3   21.71    0.60
   2   5   3   21.73    0.62
   2   5   3   22.38    0.50
   2   5   3   22.47    0.57
  -3  -5  -3   38.82    1.01
  -3  -5  -3   40.04    0.98
   3   5   3   40.11    1.02
   3   5   3   41.69    0.88
  -4  -5  -3  113.29    2.46
  -4  -5  -3  110.41    2.53
  -4  -5  -3  109.02    2.48
   4   5   3  111.53    2.57
   4   5   3  112.78    2.35
  -5  -5  -3   22.45    0.58
  -5  -5  -3   22.14    0.61
  -5  -5  -3   22.17    0.67
   5   5   3   22.41    0.57
   5   5   3   22.63    0.71
  -6  -5  -3    6.62    0.37
  -6  -5  -3    7.29    0.27
  -6  -5  -3    6.22    0.28
   6   5   3    6.84    0.29
   6   5   3    5.84    0.37
  -7  -5  -3   31.03    0.80
  -7  -5  -3   31.31    0.77
  -7  -5  -3   30.27    0.89
   7   5   3   29.67    0.94
   7   5   3   30.47    0.80
  -8  -5  -3   34.13    0.88
  -8  -5  -3   34.92    0.86
  -8  -5  -3   33.84    0.99
   8   5   3   33.89    0.91
   8   5   3   34.67    1.06
  -9  -5  -3   17.51    0.66
  -9  -5  -3   17.57    0.55
   9   5   3   17.61    0.60
   9   5   3   17.72    0.71
 -10  -5  -3    2.94    0.26
 -10  -5  -3    3.66    0.40
  10   5   3    3.20    0.34
  10   5   3    2.72    0.39
 -11  -5  -3    0.56    0.21
  11   5   3   -0.07    0.33
  11   5   3    0.77    0.29
 -12  -5  -3    1.97    0.25
  12   5   3    1.86    0.42
 -13  -5  -3    0.87    0.46
 -13  -5  -3    0.63    0.21
  12  -6  -3    0.14    0.33
 -12   6   3   -0.33    0.23
  11  -6  -3    0.99    0.35
 -11   6   3    0.50    0.25
  10  -6  -3    2.49    0.41
 -10   6   3    2.14    0.31
   9  -6  -3    3.24    0.42
  -9   6   3    2.69    0.38
  -9   6   3    2.46    0.31
   8  -6  -3    2.08    0.34
   8  -6  -3    2.70    0.31
  -8   6   3    2.62    0.35
  -8   6   3    2.27    0.28
   7  -6  -3   -0.02    0.24
   7  -6  -3    0.37    0.23
  -7   6   3    0.39    0.27
  -7   6   3    0.21    0.21
   6  -6  -3    5.98    0.37
   6  -6  -3    6.27    0.39
  -6   6   3    6.22    0.37
  -6   6   3    6.04    0.36
   5  -6  -3   45.88    1.17
   5  -6  -3   44.51    1.17
  -5   6   3   46.55    1.18
  -5   6   3   45.85    1.17
   4  -6  -3   68.81    1.60
   4  -6  -3   69.57    1.65
  -4   6   3   69.67    1.64
  -4   6   3   66.60    1.62
   3  -6  -3   43.81    1.07
   3  -6  -3   44.37    1.13
  -3   6   3   44.61    1.10
  -3   6   3   43.65    1.10
   2  -6  -3    3.38    0.24
   2  -6  -3    3.56    0.28
   2  -6  -3    3.36    0.22
  -2   6   3    3.07    0.25
  -2   6   3    3.37    0.24
   1  -6  -3  126.61    2.65
   1  -6  -3  124.21    2.80
   1  -6  -3  121.57    2.82
  -1   6   3  126.00    2.79
  -1   6   3  126.33    2.81
   0  -6  -3  199.77    4.29
   0  -6  -3  190.93    4.30
   0   6   3  195.07    4.30
   0   6   3  196.06    4.25
   0   6   3  192.96    4.04
  -1  -6  -3   72.78    1.69
  -1  -6  -3   71.13    1.70
   1   6   3   74.49    1.67
   1   6   3   71.21    1.70
   1   6   3   71.53    1.53
  -2  -6  -3   40.48    1.04
  -2  -6  -3   39.29    1.01
   2   6   3   40.18    1.04
   2   6   3   41.96    0.99
   2   6   3   40.83    0.86
  -3  -6  -3    4.69    0.30
  -3  -6  -3    4.72    0.26
   3   6   3    4.86    0.16
   3   6   3    4.29    0.28
  -4  -6  -3    4.20    0.31
  -4  -6  -3    4.48    0.26
  -4  -6  -3    4.55    0.24
   4   6   3    4.63    0.30
   4   6   3    4.51    0.18
  -5  -6  -3   58.41    1.36
  -5  -6  -3   57.79    1.45
  -5  -6  -3   58.10    1.38
   5   6   3   57.10    1.48
   5   6   3   59.12    1.27
  -6  -6  -3   39.65    1.08
  -6  -6  -3   39.83    1.00
  -6  -6  -3   40.20    0.97
   6   6   3   40.32    1.13
   6   6   3   38.38    0.92
  -7  -6  -3    2.82    0.33
  -7  -6  -3    2.62    0.24
   7   6   3    2.92    0.35
   7   6   3    2.80    0.23
  -8  -6  -3   -0.02    0.16
  -8  -6  -3   -0.04    0.28
   8   6   3   -0.07    0.29
   8   6   3    0.10    0.18
  -9  -6  -3    3.03    0.27
  -9  -6  -3    2.72    0.37
   9   6   3    2.93    0.30
   9   6   3    2.56    0.40
 -10  -6  -3    9.40    0.41
 -10  -6  -3   10.28    0.55
  10   6   3    9.91    0.58
 -11  -6  -3    5.99    0.35
  11   6   3    6.74    0.50
 -12  -6  -3    0.64    0.22
  12   6   3    1.07    0.36
 -13  -6  -3    0.04    0.19
  13   6   3   -0.52    0.32
  12  -7  -3    1.44    0.39
 -12   7   3    0.84    0.31
  11  -7  -3    1.76    0.40
 -11   7   3    1.38    0.32
  10  -7  -3   -0.10    0.30
 -10   7   3    0.23    0.26
   9  -7  -3    0.28    0.29
  -9   7   3    0.55    0.31
  -9   7   3    0.06    0.24
   8  -7  -3    4.69    0.40
  -8   7   3    4.34    0.36
  -8   7   3    4.67    0.39
   7  -7  -3    7.79    0.40
   7  -7  -3    6.23    0.43
  -7   7   3    7.46    0.45
  -7   7   3    6.30    0.41
   6  -7  -3   11.09    0.47
   6  -7  -3   10.53    0.50
  -6   7   3   10.17    0.47
  -6   7   3   10.22    0.48
   5  -7  -3    5.36    0.36
   5  -7  -3    5.40    0.35
  -5   7   3    5.31    0.35
  -5   7   3    5.20    0.35
   4  -7  -3   14.25    0.50
   4  -7  -3   13.21    0.51
  -4   7   3   13.16    0.50
  -4   7   3   14.08    0.51
   3  -7  -3   40.66    1.06
   3  -7  -3   38.84    1.00
   3  -7  -3   41.79    1.05
  -3   7   3   38.53    1.04
  -3   7   3   39.55    1.04
   2  -7  -3  108.12    2.37
   2  -7  -3  107.38    2.52
   2  -7  -3  114.69    2.52
  -2   7   3  107.78    2.51
  -2   7   3  108.16    2.49
   1  -7  -3   54.50    1.39
   1  -7  -3   57.67    1.40
   1  -7  -3   55.72    1.27
  -1   7   3   56.18    1.39
  -1   7   3   57.23    1.37
   0  -7  -3    4.46    0.31
   0  -7  -3    4.69    0.29
   0  -7  -3    4.85    0.21
   0   7   3    4.34    0.30
   0   7   3    4.90    0.27
  -1  -7  -3   10.97    0.44
  -1  -7  -3   10.69    0.44
   1   7   3   11.52    0.31
   1   7   3   11.52    0.40
   1   7   3   11.76    0.45
  -2  -7  -3   46.08    1.17
  -2  -7  -3   45.63    1.19
   2   7   3   46.55    0.97
   2   7   3   47.06    1.13
   2   7   3   46.59    1.19
  -3  -7  -3   31.23    0.84
  -3  -7  -3   30.37    0.87
   3   7   3   30.85    0.88
  -4  -7  -3   28.26    0.78
  -4  -7  -3   28.27    0.83
   4   7   3   28.12    0.60
   4   7   3   27.79    0.83
  -5  -7  -3    8.65    0.37
  -5  -7  -3    8.51    0.43
  -5  -7  -3    9.16    0.35
   5   7   3    8.55    0.45
   5   7   3    8.49    0.25
  -6  -7  -3   15.73    0.60
  -6  -7  -3   15.47    0.52
   6   7   3   15.32    0.41
   6   7   3   15.19    0.60
  -7  -7  -3   14.74    0.51
  -7  -7  -3   16.10    0.62
   7   7   3   15.35    0.45
   7   7   3   15.73    0.66
  -8  -7  -3    8.26    0.50
  -8  -7  -3    7.51    0.36
   8   7   3    6.94    0.47
  -9  -7  -3    3.56    0.42
  -9  -7  -3    3.09    0.28
   9   7   3    2.88    0.41
 -10  -7  -3   -0.13    0.18
 -10  -7  -3   -0.51    0.31
  10   7   3    0.08    0.32
 -11  -7  -3    2.25    0.28
 -11  -7  -3    2.89    0.44
  11   7   3    1.73    0.41
 -12  -7  -3    2.63    0.29
  12   7   3    3.19    0.48
 -13  -7  -3    0.67    0.22
  13   7   3    1.17    0.41
  11  -8  -3    1.79    0.42
 -11   8   3    1.72    0.36
  10  -8  -3    2.13    0.41
 -10   8   3    1.92    0.36
   9  -8  -3    1.02    0.37
  -9   8   3    1.44    0.32
  -9   8   3    1.96    0.40
   8  -8  -3    0.76    0.30
  -8   8   3    0.65    0.27
  -8   8   3    0.59    0.31
   7  -8  -3    0.52    0.26
   7  -8  -3    0.03    0.23
  -7   8   3   -0.22    0.22
  -7   8   3    0.02    0.28
   6  -8  -3    1.08    0.27
   6  -8  -3    1.25    0.26
  -6   8   3    1.13    0.25
  -6   8   3    1.24    0.30
   5  -8  -3   13.07    0.54
   5  -8  -3   13.90    0.55
  -5   8   3   13.93    0.58
  -5   8   3   13.56    0.55
   4  -8  -3   18.68    0.61
   4  -8  -3   18.91    0.64
  -4   8   3   18.85    0.66
  -4   8   3   18.52    0.64
   3  -8  -3    1.43    0.26
   3  -8  -3    1.51    0.21
  -3   8   3    1.72    0.26
  -3   8   3    1.68    0.24
   2  -8  -3   22.27    0.63
   2  -8  -3   22.69    0.71
   2  -8  -3   22.76    0.71
  -2   8   3   22.53    0.70
  -2   8   3   21.33    0.68
   1  -8  -3  143.52    3.04
   1  -8  -3  145.51    3.25
   1  -8  -3  138.82    3.25
  -1   8   3  143.03    3.27
   0  -8  -3   83.52    2.07
   0  -8  -3   88.21    2.08
   0  -8  -3   89.30    1.89
   0   8   3   87.91    2.04
   0   8   3   88.86    2.09
  -1  -8  -3   49.66    1.25
  -1  -8  -3   47.01    1.24
   1   8   3   47.12    1.05
   1   8   3   48.53    1.19
   1   8   3   46.52    1.24
  -2  -8  -3    3.56    0.28
  -2  -8  -3    3.35    0.32
   2   8   3    3.59    0.32
   2   8   3    3.53    0.26
   2   8   3    3.40    0.10
  -3  -8  -3    2.43    0.25
  -3  -8  -3    2.88    0.31
   3   8   3    2.44    0.28
  -4  -8  -3    4.69    0.31
  -4  -8  -3    4.42    0.36
   4   8   3    4.34    0.33
  -5  -8  -3   38.32    1.03
  -5  -8  -3   39.29    1.11
   5   8   3   38.48    1.11
  -6  -8  -3   10.90    0.53
  -6  -8  -3    9.97    0.43
   6   8   3    9.76    0.53
  -7  -8  -3   -0.03    0.18
  -7  -8  -3   -0.12    0.27
   7   8   3   -0.33    0.24
  -8  -8  -3    3.49    0.41
  -8  -8  -3    3.22    0.30
   8   8   3    2.40    0.38
  -9  -8  -3    4.75    0.32
  -9  -8  -3    5.15    0.49
   9   8   3    4.26    0.48
 -10  -8  -3    4.75    0.33
 -10  -8  -3    5.80    0.53
  10   8   3    4.58    0.51
 -11  -8  -3    4.07    0.49
 -11  -8  -3    3.54    0.32
  11   8   3    3.10    0.48
 -12  -8  -3   -0.14    0.21
  12   8   3    0.33    0.36
 -13  -8  -3    0.65    0.24
  13   8   3    0.54    0.40
  11  -9  -3    0.28    0.37
 -11   9   3    0.16    0.32
  10  -9  -3    0.45    0.35
 -10   9   3   -0.04    0.28
   9  -9  -3    2.95    0.43
  -9   9   3    3.43    0.47
  -9   9   3    2.68    0.39
   8  -9  -3    5.53    0.46
  -8   9   3    6.53    0.49
  -8   9   3    6.29    0.48
   7  -9  -3    6.33    0.45
  -7   9   3    7.70    0.51
  -7   9   3    6.70    0.47
   6  -9  -3    2.07    0.32
   6  -9  -3    2.65    0.33
  -6   9   3    2.53    0.36
  -6   9   3    2.30    0.32
   5  -9  -3   -0.06    0.21
   5  -9  -3   -0.04    0.23
  -5   9   3    0.02    0.22
  -5   9   3    0.08    0.25
   4  -9  -3    2.62    0.32
   4  -9  -3    2.41    0.29
  -4   9   3    1.85    0.28
  -4   9   3    2.05    0.32
   3  -9  -3   29.55    0.89
   3  -9  -3   29.59    0.82
  -3   9   3   28.70    0.88
  -3   9   3   28.71    0.90
   2  -9  -3   54.29    1.38
   2  -9  -3   51.77    1.24
   2  -9  -3   50.88    1.36
  -2   9   3   50.44    1.37
   1  -9  -3    1.51    0.25
   1  -9  -3    1.40    0.18
   1  -9  -3    1.42    0.27
  -1   9   3    0.80    0.21
  -1   9   3    1.02    0.25
   0  -9  -3   12.22    0.36
   0  -9  -3   11.67    0.50
   0  -9  -3   11.48    0.49
   0   9   3   11.29    0.50
   0   9   3   10.92    0.45
  -1  -9  -3   32.16    0.93
  -1  -9  -3   31.43    0.93
   1   9   3   30.38    0.92
   1   9   3   31.38    0.87
   1   9   3   32.07    0.73
  -2  -9  -3   34.79    1.03
  -2  -9  -3   36.93    1.03
   2   9   3   35.01    1.02
   2   9   3   37.14    0.97
  -3  -9  -3    5.88    0.37
  -3  -9  -3    5.63    0.39
   3   9   3    5.51    0.39
  -4  -9  -3    6.04    0.35
  -4  -9  -3    6.88    0.44
   4   9   3    7.19    0.45
  -5  -9  -3    2.94    0.38
  -5  -9  -3    2.65    0.30
   5   9   3    3.15    0.37
  -6  -9  -3   21.33    0.80
  -6  -9  -3   21.94    0.72
   6   9   3   22.30    0.81
  -7  -9  -3   18.45    0.65
  -7  -9  -3   18.55    0.75
   7   9   3   19.06    0.78
  -8  -9  -3    6.30    0.49
  -8  -9  -3    5.66    0.38
   8   9   3    5.98    0.50
  -9  -9  -3   -0.11    0.19
  -9  -9  -3   -0.41    0.30
   9   9   3   -0.08    0.29
 -10  -9  -3    0.04    0.32
 -10  -9  -3   -0.07    0.20
  10   9   3   -0.01    0.35
 -11  -9  -3    1.40    0.27
 -11  -9  -3    1.68    0.44
  11   9   3    2.02    0.44
 -12  -9  -3    2.01    0.30
 -12  -9  -3    1.54    0.45
  12   9   3    1.73    0.43
 -13  -9  -3    0.94    0.25
  10 -10  -3    2.05    0.43
 -10  10   3    2.16    0.41
   9 -10  -3    0.68    0.33
  -9  10   3    0.43    0.31
   8 -10  -3   -0.21    0.27
  -8  10   3    0.19    0.29
  -8  10   3    0.11    0.36
   7 -10  -3    2.26    0.35
  -7  10   3    2.11    0.39
  -7  10   3    1.68    0.34
   6 -10  -3    7.54    0.43
   6 -10  -3    6.92    0.45
  -6  10   3    7.12    0.50
  -6  10   3    8.39    0.52
   5 -10  -3    8.41    0.47
   5 -10  -3    7.95    0.45
  -5  10   3    8.60    0.48
  -5  10   3    7.85    0.50
   4 -10  -3    4.46    0.40
   4 -10  -3    4.44    0.33
  -4  10   3    4.88    0.41
  -4  10   3    4.87    0.40
   3 -10  -3    3.67    0.28
   3 -10  -3    4.62    0.38
  -3  10   3    3.40    0.38
  -3  10   3    3.42    0.35
   2 -10  -3   15.65    0.52
   2 -10  -3   16.05    0.64
  -2  10   3   16.52    0.63
  -2  10   3   16.06    0.66
   1 -10  -3   64.76    1.69
   1 -10  -3   70.50    1.72
   1 -10  -3   66.39    1.51
  -1  10   3   64.97    1.65
  -1  10   3   63.38    1.70
   0 -10  -3   23.16    0.79
   0 -10  -3   22.55    0.78
   0 -10  -3   24.17    0.62
   0  10   3   23.34    0.81
   0  10   3   24.71    0.75
  -1 -10  -3    0.65    0.28
  -1 -10  -3    0.99    0.25
   1  10   3    0.65    0.13
   1  10   3    0.61    0.26
   1  10   3    0.87    0.22
  -2 -10  -3   12.25    0.56
  -2 -10  -3   11.50    0.52
   2  10   3   12.35    0.57
  -3 -10  -3   16.75    0.63
  -3 -10  -3   14.76    0.64
   3  10   3   15.15    0.63
  -4 -10  -3   21.51    0.79
  -4 -10  -3   22.30    0.76
   4  10   3   22.33    0.81
  -5 -10  -3   25.60    0.89
  -5 -10  -3   24.92    0.82
   5  10   3   27.05    0.91
  -6 -10  -3    5.56    0.40
  -6 -10  -3    5.74    0.49
   6  10   3    5.85    0.45
  -7 -10  -3   -0.07    0.21
  -7 -10  -3    0.11    0.32
   7  10   3   -0.25    0.30
  -8 -10  -3    7.54    0.54
  -8 -10  -3    7.63    0.44
   8  10   3    6.53    0.50
  -9 -10  -3    5.17    0.37
  -9 -10  -3    5.36    0.53
   9  10   3    4.47    0.52
 -10 -10  -3    2.63    0.32
 -10 -10  -3    3.62    0.49
  10  10   3    2.54    0.45
 -11 -10  -3    0.64    0.25
 -11 -10  -3    1.23    0.44
  11  10   3    0.89    0.39
 -12 -10  -3    0.11    0.23
 -12 -10  -3    0.02    0.41
  12  10   3    0.11    0.38
   9 -11  -3    2.51    0.45
  -9  11   3    3.03    0.45
   8 -11  -3    4.64    0.48
  -8  11   3    3.98    0.49
  -8  11   3    4.89    0.55
   7 -11  -3    1.66    0.36
  -7  11   3    1.53    0.39
  -7  11   3    0.94    0.33
   6 -11  -3   -0.46    0.24
  -6  11   3   -0.58    0.26
  -6  11   3   -0.06    0.31
   5 -11  -3    4.74    0.40
   5 -11  -3    4.23    0.36
  -5  11   3    3.74    0.45
  -5  11   3    3.49    0.39
   4 -11  -3    6.97    0.43
   4 -11  -3    8.89    0.50
  -4  11   3    7.88    0.52
  -4  11   3    8.58    0.49
   3 -11  -3   13.66    0.53
   3 -11  -3   14.10    0.61
  -3  11   3   13.95    0.61
  -3  11   3   13.61    0.65
   2 -11  -3   34.02    0.92
   2 -11  -3   35.77    1.06
  -2  11   3   35.22    1.03
  -2  11   3   32.71    1.08
   1 -11  -3    5.07    0.29
   1 -11  -3    4.54    0.40
   1 -11  -3    5.38    0.40
  -1  11   3    5.20    0.38
  -1  11   3    4.39    0.44
   0 -11  -3    9.01    0.51
   0 -11  -3    9.79    0.51
   0  11   3    9.98    0.54
  -1 -11  -3   22.33    0.80
  -1 -11  -3   22.26    0.80
   1  11   3   22.94    0.82
  -2 -11  -3   12.77    0.60
  -2 -11  -3   12.84    0.60
   2  11   3   12.06    0.58
  -3 -11  -3    1.63    0.31
  -3 -11  -3    1.68    0.35
   3  11   3    1.47    0.31
  -4 -11  -3   -0.11    0.21
  -4 -11  -3   -0.40    0.25
   4  11   3   -0.11    0.28
  -5 -11  -3    2.89    0.35
  -5 -11  -3    3.31    0.41
   5  11   3    3.00    0.39
  -6 -11  -3   10.68    0.60
  -6 -11  -3    9.20    0.51
   6  11   3    8.95    0.55
  -7 -11  -3    9.46    0.50
  -7 -11  -3    9.85    0.60
   7  11   3    9.61    0.58
  -8 -11  -3    1.40    0.42
  -8 -11  -3    1.10    0.28
   8  11   3    0.87    0.38
  -9 -11  -3   -0.19    0.35
  -9 -11  -3    0.04    0.23
   9  11   3   -0.28    0.31
 -10 -11  -3    0.58    0.39
 -10 -11  -3    1.03    0.27
  10  11   3    0.97    0.40
 -11 -11  -3    1.83    0.46
 -11 -11  -3    1.33    0.28
  11  11   3    1.04    0.42
 -12 -11  -3    0.47    0.43
 -12 -11  -3    0.56    0.27
  12  11   3    1.00    0.44
   9 -12  -3    0.30    0.33
  -9  12   3    0.24    0.33
   8 -12  -3    0.38    0.32
  -8  12   3    0.62    0.36
  -8  12   3   -0.46    0.38
   7 -12  -3    3.66    0.45
  -7  12   3    2.81    0.43
  -7  12   3    4.22    0.52
   6 -12  -3    4.37    0.46
  -6  12   3    3.99    0.49
  -6  12   3    3.45    0.46
   5 -12  -3    3.96    0.42
  -5  12   3    3.02    0.44
  -5  12   3    3.51    0.43
   4 -12  -3    0.24    0.24
   4 -12  -3    0.10    0.27
  -4  12   3   -0.05    0.32
  -4  12   3    0.17    0.26
   3 -12  -3   -0.04    0.20
   3 -12  -3    0.37    0.28
  -3  12   3    0.34    0.33
  -3  12   3   -0.35    0.23
   2 -12  -3    2.75    0.29
   2 -12  -3    2.56    0.38
  -2  12   3    2.90    0.35
  -2  12   3    1.55    0.38
   1 -12  -3   20.00    0.77
  -1  12   3   18.14    0.78
   0 -12  -3   13.74    0.65
   0 -12  -3   13.52    0.63
   0  12   3   13.19    0.66
  -1 -12  -3    0.24    0.29
  -1 -12  -3    0.12    0.24
   1  12   3   -0.36    0.27
  -2 -12  -3    7.21    0.51
  -2 -12  -3    6.77    0.46
   2  12   3    6.94    0.52
  -3 -12  -3    7.88    0.50
  -3 -12  -3    7.06    0.52
   3  12   3    7.12    0.51
  -4 -12  -3    3.89    0.41
  -4 -12  -3    4.36    0.46
   4  12   3    3.52    0.43
  -5 -12  -3    2.08    0.39
  -5 -12  -3    1.51    0.32
   5  12   3    1.55    0.35
  -6 -12  -3   -0.08    0.23
  -6 -12  -3    0.00    0.33
   6  12   3   -0.64    0.27
  -7 -12  -3    2.41    0.35
  -7 -12  -3    3.12    0.47
   7  12   3    3.00    0.46
  -8 -12  -3    5.03    0.42
  -8 -12  -3    5.52    0.56
   8  12   3    3.94    0.50
  -9 -12  -3    3.85    0.54
  -9 -12  -3    2.93    0.37
   9  12   3    2.57    0.44
 -10 -12  -3    1.05    0.42
 -10 -12  -3    1.04    0.29
  10  12   3    0.22    0.38
 -11 -12  -3    0.12    0.41
 -11 -12  -3   -0.22    0.24
  11  12   3   -0.34    0.36
   8 -13  -3    1.25    0.37
  -8  13   3    1.09    0.41
   7 -13  -3    0.09    0.30
  -7  13   3   -0.35    0.33
  -7  13   3    0.51    0.41
   6 -13  -3    0.68    0.29
  -6  13   3    1.81    0.41
  -6  13   3    1.51    0.43
   5 -13  -3    3.09    0.38
  -5  13   3    2.87    0.44
  -5  13   3    3.07    0.49
   4 -13  -3    4.83    0.47
   4 -13  -3    4.93    0.40
  -4  13   3    4.69    0.53
  -4  13   3    4.13    0.47
   3 -13  -3    2.58    0.38
  -3  13   3    1.94    0.43
   2 -13  -3    0.92    0.32
  -2  13   3    0.84    0.36
   1 -13  -3    0.54    0.33
  -1  13   3    0.13    0.30
   0 -13  -3    7.35    0.55
   0  13   3    6.57    0.51
  -1 -13  -3   17.26    0.76
  -1 -13  -3   19.09    0.78
   1  13   3   18.51    0.80
  -2 -13  -3    6.69    0.52
  -2 -13  -3    5.56    0.46
   2  13   3    5.76    0.52
  -3 -13  -3    0.28    0.29
  -3 -13  -3    0.08    0.32
   3  13   3    0.02    0.32
  -4 -13  -3    2.03    0.36
  -4 -13  -3    2.22    0.41
   4  13   3    1.45    0.36
  -5 -13  -3    5.04    0.43
  -5 -13  -3    5.85    0.53
   5  13   3    4.39    0.48
  -6 -13  -3    6.29    0.56
  -6 -13  -3    5.71    0.46
   6  13   3    5.34    0.55
  -7 -13  -3    2.00    0.44
  -7 -13  -3    1.55    0.34
   7  13   3    1.05    0.39
  -8 -13  -3    0.14    0.26
  -8 -13  -3    0.05    0.40
   8  13   3   -0.01    0.36
  -9 -13  -3    0.22    0.40
  -9 -13  -3    0.28    0.27
   9  13   3    0.36    0.38
 -10 -13  -3    1.66    0.34
 -10 -13  -3    1.88    0.48
  10  13   3    2.03    0.47
   7 -14  -3    1.31    0.39
  -7  14   3    2.01    0.45
  -7  14   3    1.32    0.47
  -6  14   3    1.16    0.47
  -5  14   3    0.07    0.41
  -4  14   3    0.75    0.41
   3 -14  -3    2.74    0.44
  -3  14   3    2.32    0.48
   2 -14  -3    5.75    0.52
  -2  14   3    5.04    0.56
   1 -14  -3    3.73    0.47
  -1  14   3    2.84    0.47
   0 -14  -3    0.55    0.33
   0  14   3    0.20    0.35
  -1 -14  -3    0.50    0.34
   1  14   3    0.19    0.36
  -2 -14  -3   12.26    0.68
  -2 -14  -3   12.74    0.69
   2  14   3   11.02    0.68
  -3 -14  -3    9.34    0.59
  -3 -14  -3   10.49    0.65
   3  14   3   10.30    0.64
  -4 -14  -3    4.49    0.52
  -4 -14  -3    3.48    0.45
   4  14   3    3.35    0.46
  -5 -14  -3    1.24    0.41
  -5 -14  -3    0.60    0.32
   5  14   3    0.84    0.36
  -6 -14  -3    0.83    0.43
  -6 -14  -3    0.93    0.34
   6  14   3   -0.31    0.34
  -7 -14  -3    1.80    0.45
  -7 -14  -3    2.12    0.38
   7  14   3    0.90    0.40
  -8 -14  -3    2.42    0.49
  -8 -14  -3    1.96    0.37
   8  14   3    1.77    0.45
  -9 -14  -3    1.40    0.49
  -9 -14  -3    0.97    0.32
   9  14   3    0.44    0.41
 -10 -14  -3   -0.28    0.43
 -10 -14  -3    0.32    0.30
  10  14   3   -0.11    0.37
  -5  15   3    2.88    0.54
  -4  15   3    2.18    0.50
  -3  15   3   -0.04    0.38
   2 -15  -3    0.24    0.34
  -2  15   3   -0.17    0.37
   1 -15  -3    2.98    0.47
  -1  15   3    2.88    0.50
   0 -15  -3    3.50    0.48
   0  15   3    4.55    0.55
  -1 -15  -3    6.19    0.55
   1  15   3    5.57    0.59
  -2 -15  -3    1.68    0.45
  -2 -15  -3    1.51    0.39
   2  15   3    1.51    0.44
  -3 -15  -3    0.35    0.31
  -3 -15  -3    0.73    0.39
   3  15   3    0.23    0.38
  -4 -15  -3    2.44    0.42
  -4 -15  -3    2.84    0.49
   4  15   3    2.12    0.46
  -5 -15  -3    4.90    0.52
  -5 -15  -3    5.75    0.60
   5  15   3    4.08    0.52
  -6 -15  -3    2.80    0.51
  -6 -15  -3    2.89    0.44
   6  15   3    2.96    0.50
  -7 -15  -3    0.55    0.43
  -7 -15  -3    0.99    0.34
   7  15   3    0.44    0.38
  -8 -15  -3    0.23    0.44
  -8 -15  -3    0.03    0.30
   8  15   3   -0.04    0.39
  -9 -15  -3   -0.15    0.29
  -9 -15  -3    0.50    0.45
  -4  16   3    0.35    0.44
  -3  16   3    0.79    0.45
   2 -16  -3    2.16    0.44
  -2  16   3    1.80    0.49
   1 -16  -3    0.65    0.40
  -1  16   3    0.85    0.43
   0 -16  -3   -0.19    0.35
   0  16   3   -0.76    0.35
  -1 -16  -3    1.44    0.45
   1  16   3    1.00    0.44
  -2 -16  -3    3.57    0.52
   2  16   3    3.70    0.53
  -3 -16  -3    3.30    0.52
  -3 -16  -3    2.97    0.46
   3  16   3    3.01    0.48
  -4 -16  -3    1.84    0.39
  -4 -16  -3    1.89    0.48
   4  16   3    1.23    0.44
  -5 -16  -3   -0.45    0.30
  -5 -16  -3    0.04    0.40
   5  16   3   -0.06    0.37
  -6 -16  -3    0.51    0.35
  -6 -16  -3    0.57    0.43
   6  16   3    0.57    0.42
  -7 -16  -3    2.02    0.43
  -7 -16  -3    2.32    0.52
   7  16   3    1.99    0.47
  -2  17   3    0.36    0.42
   1 -17  -3    1.33    0.44
  -1  17   3    1.17    0.47
   0 -17  -3    2.36    0.49
   0  17   3    2.02    0.51
  -1 -17  -3    1.72    0.45
   1  17   3    0.69    0.44
  -2 -17  -3   -0.28    0.37
   2  17   3    0.02    0.39
  -3 -17  -3    0.26    0.41
   3  17   3   -0.13    0.36
  -4 -17  -3    1.69    0.47
   4  17   3    1.22    0.46
  -5 -17  -3    0.90    0.46
  -5 -17  -3    1.90    0.44
   5  17   3    1.66    0.46
   4  14  -4    1.17    0.46
  -4 -14   4    1.78    0.49
  -4 -14   4    0.60    0.39
   3  14  -4    0.58    0.41
  -3 -14   4    0.86    0.41
   2  14  -4   -0.35    0.39
  -2 -14   4   -0.69    0.37
   1  14  -4    0.34    0.44
   0  14  -4    1.42    0.50
  -1  14  -4    1.28    0.52
   6  13  -4    0.92    0.42
  -6 -13   4    0.77    0.47
  -6 -13   4    0.42    0.35
   5  13  -4    0.21    0.35
  -5 -13   4    0.24    0.32
  -5 -13   4   -0.22    0.39
   4  13  -4    0.08    0.39
  -4 -13   4    0.18    0.33
  -4 -13   4    0.24    0.42
   3  13  -4   -0.16    0.40
  -3 -13   4    0.72    0.43
  -3 -13   4    0.64    0.36
   2  13  -4    1.69    0.48
  -2 -13   4    1.92    0.42
   1  13  -4    2.30    0.48
  -1 -13   4    2.95    0.47
   0  13  -4   -0.21    0.38
  -1  13  -4    0.19    0.40
  -2  13  -4    0.88    0.48
  -3  13  -4    1.56    0.51
  -4  13  -4    0.78    0.47
   8  12  -4   -0.26    0.35
  -8 -12   4    0.24    0.46
  -8 -12   4    0.16    0.31
   7  12  -4    0.11    0.36
  -7 -12   4    0.32    0.47
  -7 -12   4   -0.09    0.30
   6  12  -4    0.82    0.39
  -6 -12   4    0.04    0.31
  -6 -12   4    0.26    0.43
   5  12  -4    1.83    0.43
  -5 -12   4    1.14    0.39
  -5 -12   4    2.35    0.49
   4  12  -4    0.84    0.40
  -4 -12   4    1.68    0.44
  -4 -12   4    1.09    0.37
   3  12  -4   -0.04    0.37
  -3 -12   4   -0.50    0.28
  -3 -12   4   -0.03    0.37
   2  12  -4   -0.55    0.35
  -2 -12   4    0.16    0.30
  -2 -12   4   -0.15    0.36
   1  12  -4    0.94    0.44
  -1 -12   4    1.43    0.39
   0  12  -4    4.08    0.58
   0 -12   4    4.66    0.48
  -1  12  -4    2.70    0.53
  -2  12  -4   -0.37    0.38
  -3  12  -4    0.02    0.40
  -4  12  -4    1.54    0.48
  -5  12  -4    1.33    0.47
   9  11  -4    0.15    0.38
  -9 -11   4    0.39    0.31
  -9 -11   4   -0.34    0.46
   8  11  -4    1.35    0.41
  -8 -11   4    1.90    0.37
  -8 -11   4    1.81    0.49
   7  11  -4    1.19    0.40
  -7 -11   4    2.21    0.49
  -7 -11   4    0.89    0.33
   6  11  -4   -0.06    0.34
  -6 -11   4   -0.32    0.39
  -6 -11   4    0.25    0.29
   5  11  -4    0.55    0.37
  -5 -11   4    0.12    0.40
  -5 -11   4   -0.10    0.29
   4  11  -4    3.81    0.51
  -4 -11   4    4.38    0.48
  -4 -11   4    4.33    0.53
   3  11  -4    4.65    0.55
  -3 -11   4    5.25    0.52
  -3 -11   4    5.31    0.54
   2  11  -4    2.71    0.48
  -2 -11   4    4.76    0.48
  -2 -11   4    3.89    0.47
   1  11  -4    1.42    0.43
  -1 -11   4    0.87    0.36
  -1 -11   4    1.00    0.33
   0  11  -4   -0.01    0.33
   0 -11   4   -0.47    0.31
  -1  11  -4    2.94    0.51
  -2  11  -4    3.72    0.55
  -3  11  -4    2.07    0.48
  -4  11  -4    0.54    0.38
  -5  11  -4   -0.36    0.37
   5 -11   4   -0.05    0.29
  -6  11  -4    2.21    0.52
   6 -11   4    1.85    0.40
  -7  11  -4    1.93    0.53
  10  10  -4    1.25    0.40
 -10 -10   4    1.57    0.52
 -10 -10   4    1.28    0.34
   9  10  -4    0.77    0.38
  -9 -10   4    0.93    0.32
  -9 -10   4    1.40    0.50
   8  10  -4   -0.43    0.32
  -8 -10   4    0.08    0.26
  -8 -10   4   -0.47    0.41
   7  10  -4    0.72    0.36
  -7 -10   4    0.48    0.28
  -7 -10   4    0.37    0.43
   6  10  -4    2.91    0.42
  -6 -10   4    3.37    0.51
  -6 -10   4    2.53    0.38
   5  10  -4    4.72    0.51
  -5 -10   4    4.30    0.44
  -5 -10   4    4.80    0.54
   4  10  -4    1.74    0.41
  -4 -10   4    1.67    0.35
  -4 -10   4    1.39    0.41
   3  10  -4   -0.16    0.28
  -3 -10   4   -0.34    0.25
  -3 -10   4   -0.50    0.31
   2  10  -4    1.95    0.42
  -2 -10   4    2.55    0.42
  -2 -10   4    1.70    0.34
   1  10  -4    5.07    0.53
  -1 -10   4    6.05    0.50
  -1 -10   4    5.06    0.44
   0  10  -4    4.55    0.52
   0 -10   4    6.69    0.46
   0 -10   4    5.42    0.51
  -1  10  -4    2.57    0.46
   1 -10   4    3.53    0.40
  -2  10  -4    0.00    0.30
   2 -10   4   -0.17    0.23
  -3  10  -4    2.13    0.45
   3 -10   4    3.10    0.35
  -4  10  -4    3.66    0.50
   4 -10   4    4.82    0.41
  -5  10  -4    5.59    0.59
   5 -10   4    4.96    0.42
  -6  10  -4    0.24    0.38
   6 -10   4    0.90    0.34
  -7  10  -4    0.05    0.31
  -7  10  -4   -0.11    0.40
   7 -10   4    0.13    0.32
  -8  10  -4    1.05    0.38
  -8  10  -4    0.60    0.45
   8 -10   4    1.03    0.36
 -11  -9   4   -0.16    0.47
 -11  -9   4   -0.31    0.24
  10   9  -4   -0.17    0.34
 -10  -9   4    0.25    0.46
 -10  -9   4    0.06    0.25
   9   9  -4    1.33    0.38
  -9  -9   4    1.32    0.31
  -9  -9   4    1.55    0.49
   8   9  -4    3.74    0.46
  -8  -9   4    3.12    0.38
  -8  -9   4    4.53    0.58
   7   9  -4    1.63    0.37
  -7  -9   4    2.54    0.50
  -7  -9   4    1.87    0.32
   6   9  -4   -0.14    0.29
  -6  -9   4   -0.04    0.37
  -6  -9   4    0.29    0.25
   5   9  -4    0.25    0.30
  -5  -9   4    0.40    0.37
  -5  -9   4    0.52    0.26
   4   9  -4    6.43    0.50
  -4  -9   4    5.39    0.44
  -4  -9   4    6.06    0.51
   3   9  -4    6.38    0.50
  -3  -9   4    5.95    0.49
  -3  -9   4    5.75    0.45
   2   9  -4    2.94    0.40
  -2  -9   4    2.87    0.39
  -2  -9   4    2.47    0.34
   1   9  -4   -0.06    0.31
  -1  -9   4    0.30    0.24
  -1  -9   4    0.05    0.27
   0   9  -4    3.57    0.46
   0  -9   4    4.95    0.46
   0  -9   4    4.14    0.30
   0  -9   4    4.37    0.41
  -1   9  -4    7.74    0.56
   1  -9   4    8.34    0.40
   1  -9   4    7.08    0.51
   1  -9   4    6.85    0.43
  -2   9  -4    9.82    0.63
   2  -9   4   10.39    0.48
   2  -9   4    9.73    0.47
  -3   9  -4    3.81    0.49
   3  -9   4    3.49    0.35
  -4   9  -4   -0.09    0.27
  -4   9  -4   -0.49    0.32
   4  -9   4   -0.34    0.23
  -5   9  -4    1.25    0.42
  -5   9  -4    0.90    0.32
   5  -9   4    1.40    0.34
  -6   9  -4    7.32    0.56
  -6   9  -4    7.09    0.61
   6  -9   4    6.15    0.46
  -7   9  -4    5.61    0.51
  -7   9  -4    4.85    0.57
   7  -9   4    4.67    0.48
  -8   9  -4    0.75    0.34
  -8   9  -4    0.30    0.41
   8  -9   4    0.37    0.33
  -9   9  -4    0.10    0.42
  -9   9  -4    0.36    0.34
   9  -9   4    0.03    0.33
 -11  -8   4    0.98    0.28
 -11  -8   4    2.03    0.53
  10   8  -4    1.47    0.37
 -10  -8   4    1.79    0.30
 -10  -8   4    1.90    0.54
   9   8  -4    0.88    0.36
  -9  -8   4    0.50    0.43
  -9  -8   4    0.43    0.24
   8   8  -4   -0.29    0.29
  -8  -8   4   -0.23    0.22
  -8  -8   4   -0.06    0.38
   7   8  -4    4.46    0.45
  -7  -8   4    4.24    0.36
  -7  -8   4    4.57    0.55
   6   8  -4    6.99    0.48
  -6  -8   4    5.97    0.42
  -6  -8   4    7.57    0.58
   5   8  -4    7.58    0.50
  -5  -8   4    7.40    0.46
  -5  -8   4    9.35    0.60
   4   8  -4    0.82    0.32
  -4  -8   4    1.08    0.26
  -4  -8   4    0.92    0.37
   3   8  -4    1.20    0.32
  -3  -8   4    1.00    0.34
  -3  -8   4    0.67    0.27
   2   8  -4    4.16    0.45
  -2  -8   4    3.66    0.38
  -2  -8   4    3.97    0.41
   1   8  -4   13.96    0.65
  -1  -8   4   14.15    0.47
  -1  -8   4   13.79    0.60
  -1  -8   4   14.25    0.62
   0   8  -4    5.71    0.45
   0  -8   4    6.02    0.33
   0  -8   4    4.99    0.39
   0  -8   4    4.79    0.39
  -1   8  -4   -0.05    0.29
   1  -8   4   -0.15    0.19
   1  -8   4   -0.04    0.23
   1  -8   4   -0.20    0.23
  -2   8  -4    2.13    0.33
  -2   8  -4    1.73    0.36
   2  -8   4    2.32    0.30
   2  -8   4    2.50    0.29
  -3   8  -4   10.12    0.60
  -3   8  -4    9.45    0.51
   3  -8   4    9.89    0.48
  -4   8  -4   11.04    0.61
  -4   8  -4   11.00    0.58
   4  -8   4   10.09    0.49
  -5   8  -4    3.68    0.41
  -5   8  -4    4.75    0.52
   5  -8   4    4.72    0.44
  -6   8  -4    0.15    0.30
  -6   8  -4    0.01    0.35
   6  -8   4    0.68    0.31
  -7   8  -4    0.28    0.40
  -7   8  -4    1.49    0.37
   7  -8   4    1.58    0.35
  -8   8  -4    5.77    0.51
  -8   8  -4    6.23    0.63
   8  -8   4    5.50    0.47
  -9   8  -4    1.96    0.50
  -9   8  -4    1.83    0.40
   9  -8   4    1.71    0.41
 -12  -7   4    0.28    0.46
 -12  -7   4   -0.03    0.21
 -11  -7   4   -0.11    0.21
 -11  -7   4    0.55    0.47
  10   7  -4    0.55    0.33
 -10  -7   4    0.03    0.22
 -10  -7   4    0.12    0.44
   9   7  -4    2.42    0.39
  -9  -7   4    1.68    0.27
  -9  -7   4    1.23    0.47
   8   7  -4    3.99    0.42
  -8  -7   4    3.86    0.36
  -8  -7   4    4.56    0.55
   7   7  -4    0.47    0.29
  -7  -7   4    0.65    0.38
  -7  -7   4    0.64    0.24
   6   7  -4    0.00    0.26
  -6  -7   4   -0.08    0.34
  -6  -7   4    0.59    0.23
   5   7  -4    5.57    0.43
  -5  -7   4    6.46    0.52
  -5  -7   4    6.13    0.42
   4   7  -4   14.85    0.64
  -4  -7   4   15.44    0.69
  -4  -7   4   14.68    0.60
   3   7  -4    4.75    0.39
  -3  -7   4    5.05    0.25
  -3  -7   4    4.58    0.44
  -3  -7   4    4.62    0.37
   2   7  -4    2.74    0.37
  -2  -7   4    2.71    0.37
  -2  -7   4    2.79    0.22
  -2  -7   4    2.87    0.32
   1   7  -4    0.32    0.29
  -1  -7   4    0.21    0.17
  -1  -7   4   -0.01    0.21
  -1  -7   4    0.35    0.27
   0   7  -4   15.36    0.66
   0  -7   4   16.70    0.64
   0  -7   4   15.14    0.50
   0  -7   4   14.90    0.59
  -1   7  -4   20.27    0.75
  -1   7  -4   19.62    0.68
   1  -7   4   20.73    0.72
   1  -7   4   20.10    0.62
   1  -7   4   20.12    0.65
  -2   7  -4    4.92    0.46
  -2   7  -4    4.38    0.36
   2  -7   4    4.22    0.31
   2  -7   4    4.56    0.31
   2  -7   4    4.51    0.37
  -3   7  -4    0.18    0.22
  -3   7  -4   -0.39    0.28
   3  -7   4   -0.40    0.19
  -4   7  -4    1.84    0.37
  -4   7  -4    1.54    0.31
   4  -7   4    2.18    0.31
  -5   7  -4    7.92    0.48
  -5   7  -4    8.97    0.55
   5  -7   4   10.24    0.52
  -6   7  -4   10.16    0.59
  -6   7  -4    9.46    0.55
   6  -7   4    9.54    0.52
  -7   7  -4    8.17    0.53
  -7   7  -4    7.47    0.59
   7  -7   4    7.55    0.50
  -8   7  -4    0.48    0.32
  -8   7  -4    0.30    0.36
   8  -7   4    0.30    0.28
  -9   7  -4    2.66    0.50
  -9   7  -4    2.40    0.40
   9  -7   4    2.37    0.41
 -10   7  -4    1.94    0.49
 -10   7  -4    1.80    0.40
  10  -7   4    1.87    0.40
 -12  -6   4   -0.04    0.47
 -12  -6   4    0.54    0.20
 -11  -6   4    0.20    0.44
 -11  -6   4    0.63    0.21
  10   6  -4    0.00    0.30
 -10  -6   4    0.43    0.43
 -10  -6   4    0.46    0.21
   9   6  -4   -0.26    0.32
   9   6  -4    0.15    0.29
  -9  -6   4   -0.07    0.20
   8   6  -4    2.20    0.40
   8   6  -4    2.83    0.37
  -8  -6   4    2.69    0.29
   7   6  -4    7.75    0.46
   7   6  -4    7.82    0.54
  -7  -6   4    8.42    0.41
   6   6  -4   11.28    0.59
   6   6  -4   11.50    0.53
  -6  -6   4   11.50    0.48
   5   6  -4    7.20    0.43
   5   6  -4    6.18    0.48
  -5  -6   4    7.29    0.30
  -5  -6   4    7.42    0.39
   4   6  -4    5.10    0.37
   4   6  -4    5.03    0.42
  -4  -6   4    5.42    0.35
  -4  -6   4    5.60    0.26
   3   6  -4   11.64    0.54
   3   6  -4   11.74    0.54
  -3  -6   4   12.31    0.52
  -3  -6   4   13.03    0.40
   2   6  -4   12.60    0.56
  -2  -6   4   12.92    0.55
  -2  -6   4   11.68    0.50
  -2  -6   4   12.76    0.40
   1   6  -4   19.60    0.69
  -1  -6   4   18.62    0.55
  -1  -6   4   20.07    0.68
  -1  -6   4   19.77    0.68
   0   6  -4    3.52    0.30
   0   6  -4    3.43    0.35
   0  -6   4    3.25    0.32
   0  -6   4    3.22    0.25
   0  -6   4    3.56    0.32
  -1   6  -4    1.84    0.25
  -1   6  -4    1.96    0.30
   1  -6   4    1.93    0.27
   1  -6   4    1.98    0.27
   1  -6   4    1.79    0.23
  -2   6  -4   41.74    1.13
  -2   6  -4   40.92    1.18
   2  -6   4   40.75    1.04
   2  -6   4   39.84    1.05
   2  -6   4   41.99    1.14
  -3   6  -4   26.99    0.90
  -3   6  -4   28.70    0.87
   3  -6   4   27.62    0.73
   3  -6   4   26.22    0.80
  -4   6  -4   11.89    0.53
  -4   6  -4   11.96    0.57
   4  -6   4   11.13    0.49
  -5   6  -4    4.82    0.40
  -5   6  -4    5.25    0.46
   5  -6   4    4.84    0.37
  -6   6  -4    0.66    0.32
  -6   6  -4    0.34    0.27
   6  -6   4    0.45    0.25
  -7   6  -4    3.96    0.40
  -7   6  -4    4.23    0.50
   7  -6   4    4.21    0.42
  -8   6  -4   11.74    0.67
  -8   6  -4    9.34    0.57
   8  -6   4   10.45    0.58
  -9   6  -4    5.33    0.47
  -9   6  -4    5.43    0.57
   9  -6   4    4.42    0.49
 -10   6  -4   -0.64    0.32
 -10   6  -4    0.37    0.30
  10  -6   4    0.44    0.35
 -11   6  -4   -0.16    0.40
 -11   6  -4    0.37    0.32
  11  -6   4    0.12    0.32
 -12  -5   4    0.12    0.17
 -12  -5   4   -0.18    0.42
  11   5  -4   -0.40    0.35
 -11  -5   4    0.65    0.19
  10   5  -4    1.40    0.32
  10   5  -4    0.58    0.38
 -10  -5   4    0.64    0.20
   9   5  -4    3.33    0.38
   9   5  -4    2.93    0.44
  -9  -5   4    3.13    0.28
   8   5  -4    2.52    0.34
   8   5  -4    2.13    0.39
  -8  -5   4    2.62    0.26
   7   5  -4   -0.13    0.24
   7   5  -4    0.07    0.30
  -7  -5   4   -0.07    0.18
  -7  -5   4   -0.06    0.20
   6   5  -4    0.35    0.31
   6   5  -4    0.79    0.25
  -6  -5   4    0.45    0.20
  -6  -5   4    1.04    0.21
   5   5  -4   25.49    0.85
   5   5  -4   25.39    0.79
  -5  -5   4   25.69    0.67
  -5  -5   4   25.62    0.75
   4   5  -4   25.88    0.80
   4   5  -4   26.12    0.83
  -4  -5   4   26.21    0.77
  -4  -5   4   25.31    0.66
   3   5  -4   -0.50    0.22
   3   5  -4    0.09    0.21
  -3  -5   4    0.04    0.13
  -3  -5   4   -0.05    0.17
   2   5  -4    1.90    0.28
   2   5  -4    2.18    0.28
  -2  -5   4    1.92    0.25
  -2  -5   4    2.33    0.20
   1   5  -4   33.02    0.91
   1   5  -4   35.21    0.97
   1   5  -4   33.49    0.88
  -1  -5   4   33.71    0.82
  -1  -5   4   31.11    0.92
  -1  -5   4   33.31    0.94
   0   5  -4   53.61    1.40
   0   5  -4   55.62    1.35
   0  -5   4   52.49    1.38
   0  -5   4   55.06    1.27
   0  -5   4   54.75    1.35
  -1   5  -4   83.12    1.94
  -1   5  -4   83.18    2.00
   1  -5   4   80.86    1.96
   1  -5   4   82.00    1.90
   1  -5   4   79.85    1.84
  -2   5  -4   29.29    0.83
  -2   5  -4   27.44    0.86
   2  -5   4   27.93    0.83
   2  -5   4   28.66    0.75
   2  -5   4   27.56    0.78
  -3   5  -4    5.56    0.39
  -3   5  -4    5.52    0.37
   3  -5   4    5.00    0.34
   3  -5   4    5.66    0.26
   3  -5   4    5.90    0.34
  -4   5  -4   13.70    0.60
  -4   5  -4   13.10    0.53
   4  -5   4   13.22    0.52
  -5   5  -4   13.97    0.58
  -5   5  -4   13.36    0.60
   5  -5   4   14.27    0.58
  -6   5  -4   14.26    0.66
  -6   5  -4   15.05    0.61
   6  -5   4   13.36    0.58
  -7   5  -4    5.16    0.49
  -7   5  -4    4.56    0.40
   7  -5   4    5.24    0.41
  -8   5  -4   -0.23    0.25
  -8   5  -4   -0.29    0.28
   8  -5   4    0.24    0.26
  -9   5  -4    3.69    0.48
  -9   5  -4    3.60    0.41
   9  -5   4    4.65    0.46
 -10   5  -4    7.28    0.51
 -10   5  -4    6.87    0.59
  10  -5   4    6.15    0.51
 -11   5  -4    2.31    0.49
 -11   5  -4    3.27    0.42
  11  -5   4    2.27    0.43
 -13  -4   4    0.32    0.13
 -13  -4   4    0.82    0.49
  12   4  -4    0.99    0.42
 -12  -4   4    0.77    0.17
  11   4  -4    0.74    0.38
 -11  -4   4    0.47    0.17
  10   4  -4   -0.25    0.27
  10   4  -4   -0.20    0.32
 -10  -4   4    0.17    0.16
   9   4  -4    0.52    0.27
   9   4  -4   -0.02    0.33
  -9  -4   4    0.66    0.17
  -9  -4   4    0.16    0.24
   8   4  -4    8.80    0.56
   8   4  -4    8.68    0.45
  -8  -4   4    8.78    0.43
  -8  -4   4    8.88    0.36
   7   4  -4   12.20    0.59
   7   4  -4   11.83    0.50
  -7  -4   4   12.24    0.43
  -7  -4   4   11.73    0.47
   6   4  -4   13.56    0.60
   6   4  -4   13.94    0.54
  -6  -4   4   14.24    0.46
  -6  -4   4   13.82    0.49
  -6  -4   4   13.74    0.47
   5   4  -4    4.72    0.39
   5   4  -4    4.59    0.33
  -5  -4   4    4.75    0.27
  -5  -4   4    4.83    0.30
  -5  -4   4    5.21    0.28
   4   4  -4   32.39    0.95
   4   4  -4   33.89    0.92
  -4  -4   4   34.52    0.83
  -4  -4   4   31.49    0.87
  -4  -4   4   34.62    0.87
   3   4  -4   64.58    1.59
   3   4  -4   65.46    1.62
  -3  -4   4   65.89    1.45
  -3  -4   4   64.35    1.55
   2   4  -4   35.37    0.95
   2   4  -4   34.55    0.95
  -2  -4   4   34.93    0.93
  -2  -4   4   34.22    0.83
   1   4  -4   10.93    0.43
   1   4  -4   11.81    0.40
   1   4  -4   11.64    0.46
  -1  -4   4   10.34    0.36
  -1  -4   4   11.95    0.45
   0   4  -4    1.80    0.23
   0   4  -4    2.03    0.22
   0   4  -4    1.88    0.24
   0  -4   4    1.85    0.23
   0  -4   4    2.13    0.20
  -1   4  -4   13.05    0.49
  -1   4  -4   12.67    0.46
   1  -4   4   13.51    0.44
   1  -4   4   13.91    0.50
   1  -4   4   12.57    0.44
  -2   4  -4   91.91    2.17
  -2   4  -4   90.15    2.12
   2  -4   4   87.29    2.02
   2  -4   4   90.31    2.03
   2  -4   4   93.61    2.14
  -3   4  -4   93.32    2.19
  -3   4  -4   92.65    2.24
   3  -4   4   95.20    2.19
   3  -4   4   93.88    2.11
   3  -4   4   91.54    2.06
  -4   4  -4   24.53    0.80
  -4   4  -4   24.20    0.75
   4  -4   4   24.31    0.74
  -5   4  -4    0.07    0.20
  -5   4  -4    0.62    0.28
   5  -4   4   -0.08    0.23
  -6   4  -4    1.35    0.27
  -6   4  -4    1.34    0.34
   6  -4   4    0.96    0.27
  -7   4  -4   11.16    0.53
  -7   4  -4   11.97    0.61
   7  -4   4   11.20    0.54
  -8   4  -4   12.34    0.64
  -8   4  -4   11.49    0.56
   8  -4   4   12.07    0.58
  -9   4  -4    1.97    0.41
  -9   4  -4    2.09    0.34
   9  -4   4    1.55    0.34
 -10   4  -4    0.31    0.38
 -10   4  -4    0.23    0.29
  10  -4   4    0.48    0.29
 -11   4  -4    0.67    0.31
 -11   4  -4    0.68    0.41
  11  -4   4    1.07    0.34
 -12   4  -4    2.17    0.49
 -12   4  -4    1.98    0.36
  12  -4   4    2.22    0.42
  13   3  -4    0.12    0.38
  12   3  -4   -0.27    0.35
 -12  -3   4    0.08    0.13
  11   3  -4    2.97    0.44
 -11  -3   4    2.51    0.20
 -11  -3   4    2.86    0.41
  10   3  -4    7.27    0.55
  10   3  -4    6.18    0.43
 -10  -3   4    6.10    0.45
 -10  -3   4    5.53    0.26
   9   3  -4    4.58    0.47
   9   3  -4    4.39    0.37
  -9  -3   4    4.45    0.38
  -9  -3   4    4.09    0.23
   8   3  -4    0.99    0.26
   8   3  -4    0.95    0.32
  -8  -3   4    0.75    0.16
  -8  -3   4    0.77    0.16
  -8  -3   4    0.87    0.26
   7   3  -4   -0.29    0.26
   7   3  -4    0.17    0.22
  -7  -3   4    0.23    0.15
  -7  -3   4    0.15    0.20
  -7  -3   4    0.04    0.14
   6   3  -4    1.56    0.23
   6   3  -4    1.12    0.30
  -6  -3   4    1.40    0.22
  -6  -3   4    1.33    0.18
  -6  -3   4    1.60    0.18
   5   3  -4   23.38    0.76
   5   3  -4   23.68    0.68
  -5  -3   4   22.19    0.63
  -5  -3   4   23.95    0.66
  -5  -3   4   24.53    0.64
   4   3  -4   37.75    1.05
   4   3  -4   38.90    1.00
  -4  -3   4   38.14    0.96
  -4  -3   4   40.52    0.95
  -4  -3   4   38.05    0.93
   3   3  -4    2.31    0.27
   3   3  -4    2.78    0.26
  -3  -3   4    2.61    0.21
  -3  -3   4    2.11    0.20
  -3  -3   4    2.41    0.20
   2   3  -4   23.40    0.68
   2   3  -4   23.66    0.69
  -2  -3   4   24.21    0.61
  -2  -3   4   23.12    0.66
   1   3  -4   33.16    0.86
   1   3  -4   32.29    0.85
   1   3  -4   32.27    0.81
  -1  -3   4   30.44    0.77
  -1  -3   4   32.90    0.85
   0   3  -4   44.19    1.07
   0   3  -4   44.89    1.08
   0   3  -4   44.66    1.11
   0  -3   4   43.10    1.10
   0  -3   4   43.18    1.02
  -1   3  -4   33.29    0.85
  -1   3  -4   32.65    0.80
  -1   3  -4   33.55    0.87
   1  -3   4   30.63    0.80
   1  -3   4   31.63    0.86
  -2   3  -4    1.25    0.19
   2  -3   4    1.98    0.21
   2  -3   4    1.44    0.20
  -3   3  -4   20.92    0.65
  -3   3  -4   20.81    0.67
   3  -3   4   20.52    0.63
   3  -3   4   20.81    0.50
   3  -3   4   20.50    0.62
  -4   3  -4   72.94    1.76
  -4   3  -4   72.06    1.81
   4  -3   4   75.99    1.74
   4  -3   4   72.36    1.72
  -5   3  -4   33.24    0.94
  -5   3  -4   32.84    0.99
   5  -3   4   33.40    0.93
  -6   3  -4    6.75    0.39
  -6   3  -4    7.31    0.47
   6  -3   4    6.71    0.41
  -7   3  -4    4.33    0.40
  -7   3  -4    4.23    0.36
   7  -3   4    4.57    0.41
  -8   3  -4    0.71    0.33
  -8   3  -4    0.91    0.26
   8  -3   4    1.39    0.31
  -9   3  -4    5.56    0.49
  -9   3  -4    5.49    0.39
   9  -3   4    5.43    0.43
 -10   3  -4    3.38    0.38
 -10   3  -4    3.49    0.48
  10  -3   4    3.35    0.43
 -11   3  -4    1.99    0.44
 -11   3  -4    1.28    0.31
  11  -3   4    2.07    0.40
 -12   3  -4   -0.33    0.38
 -12   3  -4    0.05    0.26
  12  -3   4    0.09    0.30
  12   2  -4    0.81    0.37
 -12  -2   4    0.31    0.32
 -12  -2   4    0.52    0.12
  11   2  -4   -0.13    0.33
 -11  -2   4   -0.11    0.30
 -11  -2   4    0.03    0.11
  10   2  -4    0.51    0.28
  10   2  -4    0.29    0.31
 -10  -2   4    0.60    0.14
 -10  -2   4    0.41    0.29
 -10  -2   4    0.31    0.12
   9   2  -4    6.01    0.36
   9   2  -4    5.36    0.45
  -9  -2   4    4.84    0.23
  -9  -2   4    4.71    0.21
  -9  -2   4    5.28    0.38
   8   2  -4   10.94    0.55
   8   2  -4   11.29    0.48
  -8  -2   4   10.80    0.34
  -8  -2   4   10.81    0.33
  -8  -2   4   10.76    0.50
   7   2  -4    6.11    0.35
   7   2  -4    5.22    0.42
  -7  -2   4    6.14    0.24
  -7  -2   4    6.04    0.24
  -7  -2   4    5.91    0.37
   6   2  -4    3.05    0.24
   6   2  -4    2.59    0.32
  -6  -2   4    2.75    0.17
  -6  -2   4    2.87    0.28
  -6  -2   4    2.86    0.18
   5   2  -4    2.67    0.22
   5   2  -4    2.72    0.29
  -5  -2   4    3.09    0.25
  -5  -2   4    2.78    0.18
  -5  -2   4    3.27    0.19
   4   2  -4   58.56    1.49
   4   2  -4   61.01    1.42
  -4  -2   4   60.87    1.38
  -4  -2   4   61.27    1.38
  -4  -2   4   58.32    1.37
   3   2  -4  127.71    2.82
   3   2  -4  122.57    2.85
  -3  -2   4  127.20    2.77
  -3  -2   4  125.46    2.69
  -3  -2   4  125.70    2.77
   2   2  -4   39.41    1.01
   2   2  -4   39.29    0.98
  -2  -2   4   40.35    0.96
  -2  -2   4   38.64    0.92
   1   2  -4    3.07    0.22
   1   2  -4    2.70    0.19
   1   2  -4    2.52    0.23
  -1  -2   4    2.94    0.19
  -1  -2   4    2.56    0.22
   0   2  -4    6.85    0.29
   0   2  -4    6.52    0.28
   0   2  -4    6.29    0.27
   0  -2   4    6.29    0.29
   0  -2   4    5.91    0.25
  -1   2  -4   25.52    0.68
  -1   2  -4   24.52    0.62
  -1   2  -4   24.60    0.69
   1  -2   4   23.67    0.68
   1  -2   4   26.01    0.65
  -2   2  -4  119.25    2.65
  -2   2  -4  115.41    2.68
   2  -2   4  111.56    2.54
   2  -2   4  125.53    2.66
  -3   2  -4   54.71    1.34
  -3   2  -4   52.56    1.29
   3  -2   4   55.02    1.28
   3  -2   4   49.91    1.25
   3  -2   4   52.36    1.15
  -4   2  -4    2.98    0.25
  -4   2  -4    3.10    0.30
   4  -2   4    3.12    0.26
  -5   2  -4   18.44    0.59
  -5   2  -4   17.09    0.62
   5  -2   4   17.11    0.58
  -6   2  -4   37.05    1.00
  -6   2  -4   37.75    1.08
   6  -2   4   35.33    1.01
  -7   2  -4   27.30    0.81
  -7   2  -4   26.33    0.90
   7  -2   4   26.86    0.85
  -8   2  -4   15.63    0.59
  -8   2  -4   16.46    0.71
   8  -2   4   15.54    0.65
  -9   2  -4    1.18    0.27
  -9   2  -4    1.31    0.37
   9  -2   4    1.27    0.32
 -10   2  -4   -0.05    0.31
 -10   2  -4    0.15    0.23
  10  -2   4    0.19    0.28
 -11   2  -4    1.37    0.29
 -11   2  -4    0.60    0.39
  11  -2   4    1.15    0.35
 -12   2  -4    2.16    0.34
 -12   2  -4    2.07    0.47
  12  -2   4    2.07    0.43
 -13  -1   4    0.18    0.35
  12   1  -4    0.43    0.36
 -12  -1   4    0.34    0.34
 -12  -1   4    0.49    0.12
  11   1  -4    4.46    0.47
 -11  -1   4    4.73    0.47
  10   1  -4    5.23    0.39
  10   1  -4    4.83    0.47
 -10  -1   4    4.57    0.20
 -10  -1   4    4.17    0.21
 -10  -1   4    4.90    0.45
   9   1  -4    1.72    0.35
   9   1  -4    2.12    0.30
  -9  -1   4    1.63    0.14
  -9  -1   4    2.31    0.33
  -9  -1   4    1.73    0.15
   8   1  -4    5.14    0.44
   8   1  -4    4.10    0.32
  -8  -1   4    4.36    0.19
  -8  -1   4    3.85    0.18
  -8  -1   4    5.10    0.38
   7   1  -4   20.44    0.63
   7   1  -4   20.65    0.72
  -7  -1   4   20.13    0.51
  -7  -1   4   20.25    0.67
   6   1  -4   12.53    0.43
   6   1  -4   11.13    0.50
  -6  -1   4   12.29    0.34
  -6  -1   4   12.15    0.34
  -6  -1   4   12.55    0.47
   5   1  -4   53.73    1.37
   5   1  -4   53.63    1.28
  -5  -1   4   53.55    1.28
  -5  -1   4   54.14    1.22
  -5  -1   4   54.20    1.21
   4   1  -4   34.60    0.95
   4   1  -4   35.36    0.86
  -4  -1   4   35.16    0.88
  -4  -1   4   35.13    0.83
  -4  -1   4   35.48    0.83
   3   1  -4    1.06    0.14
   3   1  -4    0.44    0.19
  -3  -1   4    0.84    0.12
  -3  -1   4    0.99    0.16
  -3  -1   4    0.94    0.13
   2   1  -4   36.72    0.95
   2   1  -4   38.02    0.91
  -2  -1   4   39.39    0.90
  -2  -1   4   37.57    0.91
  -2  -1   4   38.47    0.91
   1   1  -4  294.11    6.39
   1   1  -4  292.96    6.39
   1   1  -4  297.84    6.33
  -1  -1   4  300.92    6.35
  -1  -1   4  292.91    6.11
   0   1  -4  106.83    2.41
   0   1  -4  105.02    2.39
   0   1  -4  108.47    2.40
   0  -1   4  109.60    2.30
   0  -1   4  110.89    2.41
  -1   1  -4   65.95    1.48
  -1   1  -4   64.69    1.53
  -1   1  -4   66.33    1.52
   1  -1   4   66.24    1.53
   1  -1   4   66.37    1.46
  -2   1  -4    0.13    0.15
  -2   1  -4   -0.09    0.14
  -2   1  -4    0.07    0.09
   2  -1   4    0.08    0.13
   2  -1   4   -0.15    0.12
  -3   1  -4   70.82    1.64
  -3   1  -4   68.71    1.68
   3  -1   4   71.00    1.59
   3  -1   4   70.92    1.63
  -4   1  -4   34.17    0.95
  -4   1  -4   35.59    0.91
   4  -1   4   34.98    0.90
  -5   1  -4   17.31    0.55
  -5   1  -4   15.97    0.59
   5  -1   4   17.06    0.57
  -6   1  -4    1.52    0.28
  -6   1  -4    0.98    0.21
   6  -1   4    1.36    0.25
  -7   1  -4    3.07    0.29
  -7   1  -4    2.79    0.36
   7  -1   4    2.31    0.31
  -8   1  -4   11.53    0.59
  -8   1  -4    9.60    0.46
   8  -1   4    9.95    0.51
  -9   1  -4   12.98    0.53
  -9   1  -4   14.01    0.68
   9  -1   4   12.85    0.60
 -10   1  -4    6.62    0.42
 -10   1  -4    7.95    0.57
  10  -1   4    7.52    0.49
 -11   1  -4    0.43    0.25
 -11   1  -4    0.77    0.41
  11  -1   4    0.63    0.32
 -12   1  -4    0.22    0.25
 -12   1  -4    0.21    0.40
  12  -1   4    0.20    0.30
 -13   1  -4    1.34    0.31
 -13   1  -4    0.77    0.44
  13  -1   4    1.67    0.42
 -13   0   4    0.62    0.38
 -13   0   4    0.15    0.14
  12   0  -4    0.55    0.35
 -12   0   4    0.77    0.16
 -12   0   4    0.91    0.36
  11   0  -4   -0.11    0.30
  11   0  -4   -0.15    0.31
 -11   0   4    0.11    0.13
 -11   0   4    0.28    0.32
  10   0  -4    2.07    0.34
  10   0  -4    1.88    0.35
 -10   0   4    1.72    0.35
 -10   0   4    1.67    0.16
   9   0  -4    7.35    0.49
   9   0  -4    7.36    0.44
  -9   0   4    8.10    0.46
  -9   0   4    7.13    0.26
  -9   0   4    7.07    0.26
   8   0  -4   20.63    0.64
   8   0  -4   19.19    0.68
   8   0  -4   20.08    0.73
  -8   0   4   19.29    0.50
  -8   0   4   18.90    0.49
   7   0  -4    0.03    0.18
   7   0  -4   -0.16    0.20
   7   0  -4    0.46    0.25
  -7   0   4    0.06    0.10
  -7   0   4    0.16    0.11
   6   0  -4    3.00    0.31
   6   0  -4    3.07    0.23
  -6   0   4    2.10    0.26
  -6   0   4    2.87    0.16
   5   0  -4   25.99    0.77
   5   0  -4   25.89    0.68
  -5   0   4   25.91    0.62
  -5   0   4   26.30    0.72
  -5   0   4   25.48    0.62
   4   0  -4  191.45    4.16
   4   0  -4  187.40    4.23
  -4   0   4  196.24    4.11
  -4   0   4  189.51    4.05
   3   0  -4   89.30    1.98
   3   0  -4   87.60    2.06
  -3   0   4   88.38    1.96
  -3   0   4   92.59    1.98
  -3   0   4   90.29    1.97
   2   0  -4  105.41    2.38
   2   0  -4  105.41    2.32
  -2   0   4  106.46    2.32
  -2   0   4  105.07    2.32
  -2   0   4  106.46    2.27
   1   0  -4    0.10    0.13
   1   0  -4    0.06    0.10
  -1   0   4    0.22    0.12
  -1   0   4    0.17    0.10
   0   0  -4   49.96    1.17
   0   0  -4   53.08    1.19
   0   0  -4   51.00    1.18
   0   0   4   52.46    1.15
   0   0   4   50.84    1.19
  -1   0  -4    0.63    0.13
  -1   0  -4    0.89    0.12
  -1   0  -4    0.97    0.15
   1   0   4    0.88    0.12
   1   0   4    0.65    0.12
  -2   0  -4  151.01    3.33
  -2   0  -4  150.09    3.37
  -2   0  -4  148.75    3.26
   2   0   4  158.59    3.33
   2   0   4  151.00    3.20
  -3   0  -4   66.84    1.54
  -3   0  -4   64.64    1.58
   3   0   4   66.52    1.49
  -4   0  -4   21.20    0.66
  -4   0  -4   21.59    0.61
   4   0   4   22.18    0.62
  -5   0  -4   58.14    1.50
  -5   0  -4   58.72    1.41
  -5   0  -4   62.05    1.42
   5   0   4   57.15    1.40
  -6   0  -4   55.99    1.32
  -6   0  -4   51.37    1.41
  -6   0  -4   52.68    1.31
   6   0   4   54.16    1.33
  -7   0  -4   35.67    0.96
  -7   0  -4   36.31    1.08
   7   0   4   35.97    1.01
  -8   0  -4    3.73    0.43
  -8   0  -4    2.75    0.28
   8   0   4    3.49    0.35
  -9   0  -4    0.98    0.34
  -9   0  -4    0.79    0.23
   9   0   4    1.24    0.30
 -10   0  -4    2.57    0.31
 -10   0  -4    2.78    0.43
  10   0   4    2.42    0.36
 -11   0  -4    5.98    0.59
 -11   0  -4    5.82    0.39
  11   0   4    5.91    0.47
 -12   0  -4    3.78    0.54
 -12   0  -4    2.63    0.33
  12   0   4    2.75    0.44
 -13   0  -4    0.74    0.45
 -13   0  -4    1.24    0.28
  13   0   4    1.54    0.40
 -13   1   4   -0.33    0.32
 -13   1   4    0.28    0.17
  12  -1  -4    1.94    0.39
 -12   1   4    1.89    0.21
  11  -1  -4    7.15    0.51
  11  -1  -4    7.25    0.53
 -11   1   4    6.65    0.30
  10  -1  -4    4.23    0.44
  10  -1  -4    5.66    0.45
 -10   1   4    3.63    0.23
   9  -1  -4    0.76    0.27
   9  -1  -4    1.24    0.30
  -9   1   4    0.96    0.15
  -9   1   4    1.20    0.17
  -9   1   4    0.58    0.30
   8  -1  -4    6.69    0.43
   8  -1  -4    6.94    0.43
  -8   1   4    6.86    0.41
  -8   1   4    6.55    0.27
  -8   1   4    6.48    0.25
   7  -1  -4   26.48    0.82
   7  -1  -4   26.38    0.80
  -7   1   4   26.73    0.66
  -7   1   4   26.25    0.65
  -7   1   4   27.04    0.77
   6  -1  -4   18.60    0.63
   6  -1  -4   18.96    0.54
   6  -1  -4   18.30    0.60
  -6   1   4   18.41    0.47
  -6   1   4   18.97    0.48
   5  -1  -4   26.60    0.75
   5  -1  -4   26.53    0.78
   5  -1  -4   26.87    0.69
  -5   1   4   27.94    0.65
  -5   1   4   26.25    0.64
   4  -1  -4    0.56    0.19
   4  -1  -4    0.41    0.12
  -4   1   4    0.18    0.17
  -4   1   4    0.21    0.11
  -4   1   4    0.36    0.10
   3  -1  -4   26.25    0.62
   3  -1  -4   25.81    0.72
  -3   1   4   26.06    0.64
  -3   1   4   26.70    0.69
  -3   1   4   27.11    0.65
   2  -1  -4  201.40    4.33
   2  -1  -4  196.82    4.41
  -2   1   4  204.03    4.34
  -2   1   4  203.18    4.23
  -2   1   4  204.95    4.35
   1  -1  -4  295.90    6.41
   1  -1  -4  289.80    6.35
   1  -1  -4  294.35    6.39
  -1   1   4  300.11    6.14
  -1   1   4  306.96    6.36
   0  -1  -4  175.07    3.85
   0  -1  -4  173.61    3.84
   0  -1  -4  184.30    3.85
   0   1   4  178.10    3.84
   0   1   4  177.11    3.70
  -1  -1  -4   72.88    1.63
  -1  -1  -4   74.99    1.66
  -1  -1  -4   71.83    1.65
   1   1   4   74.47    1.64
   1   1   4   72.37    1.58
  -2  -1  -4    2.16    0.17
  -2  -1  -4    2.50    0.21
  -2  -1  -4    2.18    0.14
   2   1   4    2.11    0.16
   2   1   4    2.09    0.17
  -3  -1  -4   97.60    2.28
  -3  -1  -4  101.51    2.16
  -3  -1  -4   97.17    2.22
   3   1   4  101.92    2.16
  -4  -1  -4  111.67    2.65
  -4  -1  -4  113.65    2.57
  -4  -1  -4  116.73    2.49
  -4  -1  -4  118.27    2.57
   4   1   4  116.73    2.51
  -5  -1  -4    6.09    0.39
  -5  -1  -4    6.48    0.30
  -5  -1  -4    7.03    0.29
  -5  -1  -4    6.74    0.22
   5   1   4    6.58    0.33
  -6  -1  -4   -0.12    0.11
  -6  -1  -4    0.14    0.14
  -6  -1  -4   -0.01    0.14
  -6  -1  -4    0.19    0.22
   6   1   4    0.53    0.19
  -7  -1  -4    1.09    0.31
  -7  -1  -4    0.94    0.19
   7   1   4    1.17    0.25
  -8  -1  -4   23.68    0.85
  -8  -1  -4   22.07    0.68
   8   1   4   23.57    0.77
  -9  -1  -4    8.91    0.56
  -9  -1  -4    8.80    0.41
   9   1   4    7.53    0.45
 -10  -1  -4    2.00    0.27
 -10  -1  -4    1.48    0.41
  10   1   4    2.42    0.35
 -11  -1  -4    0.06    0.22
 -11  -1  -4   -0.35    0.36
  11   1   4   -0.15    0.28
 -12  -1  -4    3.08    0.52
 -12  -1  -4    2.28    0.30
  12   1   4    2.64    0.43
 -13  -1  -4    1.70    0.30
 -13  -1  -4    2.34    0.52
  13   1   4    2.13    0.41
  13  -2  -4    0.44    0.36
 -13   2   4    0.65    0.21
  12  -2  -4    0.77    0.35
 -12   2   4    0.86    0.21
  11  -2  -4    0.27    0.31
  11  -2  -4    0.04    0.30
 -11   2   4    0.07    0.17
  10  -2  -4    3.98    0.43
  10  -2  -4    4.32    0.43
 -10   2   4    3.99    0.26
   9  -2  -4   13.63    0.60
   9  -2  -4   12.40    0.58
  -9   2   4   13.60    0.44
  -9   2   4   13.06    0.55
   8  -2  -4    9.91    0.50
   8  -2  -4    9.04    0.48
  -8   2   4    9.22    0.35
  -8   2   4    9.59    0.45
  -8   2   4    9.24    0.34
   7  -2  -4    0.32    0.23
   7  -2  -4    0.30    0.23
  -7   2   4    0.35    0.14
  -7   2   4    0.34    0.13
  -7   2   4    0.00    0.22
   6  -2  -4    0.89    0.22
   6  -2  -4    0.77    0.23
  -6   2   4    0.55    0.19
  -6   2   4    0.70    0.12
  -6   2   4    0.96    0.14
   5  -2  -4   32.75    0.88
   5  -2  -4   33.46    0.91
  -5   2   4   33.02    0.79
  -5   2   4   33.51    0.81
  -5   2   4   33.37    0.83
   4  -2  -4   35.39    0.90
   4  -2  -4   34.48    0.92
  -4   2   4   36.66    0.84
  -4   2   4   36.07    0.85
  -4   2   4   35.14    0.84
   3  -2  -4   41.04    1.05
  -3   2   4   42.13    1.01
  -3   2   4   43.63    0.95
  -3   2   4   43.36    0.99
  -3   2   4   41.34    0.98
   2  -2  -4    7.94    0.30
  -2   2   4    8.08    0.27
  -2   2   4    8.08    0.28
  -2   2   4    7.77    0.30
   1  -2  -4  104.04    2.41
   1  -2  -4  112.02    2.38
  -1   2   4  109.27    2.38
  -1   2   4  109.21    2.32
   0  -2  -4   57.15    1.32
   0  -2  -4   58.40    1.32
   0   2   4   56.69    1.27
   0   2   4   58.22    1.30
   0   2   4   57.44    1.28
  -1  -2  -4  109.07    2.39
  -1  -2  -4  106.66    2.37
   1   2   4  105.34    2.36
   1   2   4  109.90    2.38
   1   2   4  107.41    2.28
  -2  -2  -4   75.44    1.71
  -2  -2  -4   76.76    1.69
   2   2   4   74.62    1.69
   2   2   4   75.24    1.64
   2   2   4   76.55    1.73
  -3  -2  -4   45.89    1.10
  -3  -2  -4   45.75    1.06
   3   2   4   46.37    1.13
   3   2   4   45.83    1.05
  -4  -2  -4    8.01    0.29
  -4  -2  -4    7.83    0.30
  -4  -2  -4    7.81    0.27
   4   2   4    7.80    0.31
   4   2   4    7.29    0.35
  -5  -2  -4  156.92    3.45
  -5  -2  -4  163.82    3.48
  -5  -2  -4  161.15    3.49
   5   2   4  155.05    3.59
   5   2   4  156.92    3.40
  -6  -2  -4   28.52    0.76
  -6  -2  -4   27.33    0.71
  -6  -2  -4   30.53    0.75
   6   2   4   27.69    0.78
   6   2   4   28.38    0.86
  -7  -2  -4    8.65    0.32
  -7  -2  -4    8.70    0.34
  -7  -2  -4    7.88    0.49
  -7  -2  -4    7.70    0.34
   7   2   4    8.40    0.41
   7   2   4    8.07    0.44
  -8  -2  -4   -0.49    0.28
  -8  -2  -4   -0.33    0.15
   8   2   4   -0.19    0.22
  -9  -2  -4   12.62    0.66
  -9  -2  -4   11.61    0.46
   9   2   4   13.20    0.57
 -10  -2  -4    6.68    0.36
 -10  -2  -4    7.10    0.55
  10   2   4    6.62    0.43
 -11  -2  -4    5.64    0.58
 -11  -2  -4    5.69    0.37
  11   2   4    6.05    0.44
 -12  -2  -4    2.39    0.30
 -12  -2  -4    2.82    0.52
  12   2   4    2.95    0.42
 -13  -2  -4    0.12    0.43
 -13  -2  -4    0.60    0.25
  13   2   4    0.51    0.34
  13  -3  -4    1.34    0.41
 -13   3   4    0.53    0.23
  12  -3  -4    1.50    0.41
 -12   3   4    1.21    0.24
  11  -3  -4    2.72    0.43
 -11   3   4    2.76    0.27
  10  -3  -4    4.00    0.41
  10  -3  -4    3.10    0.40
 -10   3   4    3.54    0.28
   9  -3  -4    0.01    0.25
   9  -3  -4   -0.39    0.26
  -9   3   4    0.27    0.17
  -9   3   4   -0.22    0.26
   8  -3  -4   22.04    0.77
   8  -3  -4   22.64    0.75
  -8   3   4   22.83    0.64
  -8   3   4   22.19    0.71
   7  -3  -4   18.14    0.64
   7  -3  -4   18.79    0.65
  -7   3   4   18.36    0.55
  -7   3   4   18.25    0.60
  -7   3   4   18.80    0.54
   6  -3  -4   30.77    0.86
   6  -3  -4   28.49    0.85
  -6   3   4   30.27    0.76
  -6   3   4   30.60    0.78
  -6   3   4   30.19    0.80
   5  -3  -4   16.35    0.55
   5  -3  -4   16.55    0.55
  -5   3   4   17.47    0.49
  -5   3   4   16.92    0.50
  -5   3   4   16.75    0.47
   4  -3  -4    2.54    0.24
   4  -3  -4    2.68    0.24
  -4   3   4    2.36    0.17
  -4   3   4    2.55    0.17
  -4   3   4    2.49    0.19
   3  -3  -4    0.17    0.16
   3  -3  -4    0.25    0.12
  -3   3   4    0.37    0.12
  -3   3   4    0.38    0.09
  -3   3   4    0.25    0.13
   2  -3  -4   74.98    1.80
  -2   3   4   80.50    1.76
  -2   3   4   80.15    1.71
   1  -3  -4    6.18    0.28
   1  -3  -4    6.62    0.26
  -1   3   4    6.13    0.24
  -1   3   4    6.49    0.25
  -1   3   4    6.40    0.18
   0  -3  -4  113.52    2.52
   0  -3  -4  109.09    2.50
   0   3   4  115.63    2.49
   0   3   4  111.23    2.40
   0   3   4  117.38    2.47
  -1  -3  -4   42.06    1.04
  -1  -3  -4   44.58    1.04
   1   3   4   43.24    1.02
   1   3   4   45.97    1.03
   1   3   4   43.24    0.98
  -2  -3  -4  157.81    3.46
  -2  -3  -4  157.01    3.46
   2   3   4  157.18    3.43
   2   3   4  159.10    3.30
   2   3   4  161.25    3.49
  -3  -3  -4  155.38    3.43
  -3  -3  -4  154.35    3.44
   3   3   4  157.48    3.50
   3   3   4  160.94    3.29
  -4  -3  -4  174.83    3.84
  -4  -3  -4  176.68    3.82
  -4  -3  -4  179.17    3.85
   4   3   4  179.19    3.71
   4   3   4  169.90    3.93
  -5  -3  -4    9.85    0.38
  -5  -3  -4   11.91    0.37
  -5  -3  -4   10.83    0.37
   5   3   4   11.16    0.39
   5   3   4   11.11    0.47
  -6  -3  -4    9.58    0.36
  -6  -3  -4    9.80    0.36
  -6  -3  -4    9.86    0.35
   6   3   4    9.41    0.38
   6   3   4    8.93    0.44
  -7  -3  -4   26.04    0.71
  -7  -3  -4   27.40    0.70
  -7  -3  -4   25.42    0.71
   7   3   4   25.39    0.83
   7   3   4   25.57    0.75
  -8  -3  -4   26.44    0.73
  -8  -3  -4   26.47    0.73
   8   3   4   24.38    0.77
   8   3   4   25.06    0.85
  -9  -3  -4    6.14    0.34
   9   3   4    6.13    0.48
   9   3   4    6.57    0.42
 -10  -3  -4    0.29    0.36
 -10  -3  -4    0.44    0.19
  10   3   4    0.53    0.25
 -11  -3  -4    1.52    0.45
 -11  -3  -4    1.48    0.24
  11   3   4    1.42    0.34
 -12  -3  -4    2.39    0.51
 -12  -3  -4    1.46    0.26
  12   3   4    1.27    0.36
 -13  -3  -4    2.62    0.53
 -13  -3  -4    2.27    0.30
  13   3   4    2.18    0.40
 -13   4   4    0.13    0.23
  12  -4  -4    0.22    0.32
 -12   4   4    0.08    0.21
  11  -4  -4    0.69    0.34
 -11   4   4    0.50    0.23
  10  -4  -4    3.37    0.43
  10  -4  -4    4.10    0.40
 -10   4   4    3.69    0.31
   9  -4  -4   16.99    0.64
   9  -4  -4   15.05    0.66
  -9   4   4   15.61    0.55
  -9   4   4   16.10    0.62
   8  -4  -4    4.19    0.38
   8  -4  -4    4.35    0.40
  -8   4   4    3.61    0.35
  -8   4   4    3.82    0.29
   7  -4  -4    4.51    0.36
   7  -4  -4    4.56    0.36
  -7   4   4    4.23    0.27
  -7   4   4    4.65    0.31
   6  -4  -4    5.30    0.34
   6  -4  -4    5.12    0.33
  -6   4   4    5.01    0.29
  -6   4   4    5.47    0.27
  -6   4   4    5.44    0.29
   5  -4  -4   18.72    0.61
   5  -4  -4   19.05    0.60
  -5   4   4   19.21    0.55
  -5   4   4   19.89    0.58
  -5   4   4   19.46    0.54
   4  -4  -4   20.54    0.62
   4  -4  -4   21.36    0.63
  -4   4   4   21.26    0.60
  -4   4   4   20.64    0.55
  -4   4   4   21.97    0.59
   3  -4  -4    5.53    0.29
   3  -4  -4    4.92    0.27
  -3   4   4    5.23    0.20
  -3   4   4    4.58    0.24
   2  -4  -4   -0.11    0.11
   2  -4  -4   -0.20    0.15
  -2   4   4    0.02    0.11
  -2   4   4   -0.21    0.13
  -2   4   4    0.08    0.10
   1  -4  -4   73.20    1.73
   1  -4  -4   76.53    1.77
  -1   4   4   78.20    1.69
  -1   4   4   78.15    1.67
  -1   4   4   75.85    1.73
   0  -4  -4  111.26    2.52
   0  -4  -4  111.36    2.50
   0   4   4  113.99    2.48
   0   4   4  115.87    2.49
   0   4   4  110.20    2.38
  -1  -4  -4    7.56    0.31
  -1  -4  -4    7.65    0.31
   1   4   4    7.73    0.25
   1   4   4    7.69    0.27
   1   4   4    8.04    0.28
  -2  -4  -4    4.94    0.25
  -2  -4  -4    4.68    0.23
   2   4   4    4.54    0.19
   2   4   4    4.73    0.21
   2   4   4    4.66    0.25
  -3  -4  -4   33.24    0.82
  -3  -4  -4   31.08    0.82
   3   4   4   32.45    0.85
   3   4   4   31.81    0.75
  -4  -4  -4  153.05    3.43
  -4  -4  -4  150.41    3.41
  -4  -4  -4  158.24    3.38
   4   4   4  160.19    3.27
   4   4   4  154.85    3.50
  -5  -4  -4  142.10    3.01
  -5  -4  -4  138.00    3.04
  -5  -4  -4  134.53    3.06
   5   4   4  135.69    3.15
   5   4   4  136.63    2.94
  -6  -4  -4   71.83    1.69
  -6  -4  -4   73.44    1.66
  -6  -4  -4   72.54    1.71
   6   4   4   71.48    1.80
   6   4   4   74.12    1.66
  -7  -4  -4    8.25    0.35
  -7  -4  -4    8.04    0.32
  -7  -4  -4    8.65    0.39
   7   4   4    8.51    0.38
   7   4   4    7.78    0.47
  -8  -4  -4   10.79    0.45
  -8  -4  -4   10.59    0.42
   8   4   4    9.95    0.56
   8   4   4   11.54    0.47
  -9  -4  -4   12.51    0.47
  -9  -4  -4   12.50    0.50
   9   4   4   12.47    0.62
   9   4   4   12.35    0.52
 -10  -4  -4   13.62    0.50
  10   4   4   13.89    0.58
  10   4   4   12.44    0.63
 -11  -4  -4    5.93    0.61
 -11  -4  -4    4.66    0.33
  11   4   4    5.84    0.44
 -12  -4  -4   -0.28    0.42
 -12  -4  -4    0.08    0.21
  12   4   4    1.08    0.33
 -13  -4  -4    0.26    0.23
 -13  -4  -4    0.79    0.45
  13   4   4    0.21    0.32
  12  -5  -4    0.09    0.35
 -12   5   4    0.58    0.24
  11  -5  -4    0.35    0.34
 -11   5   4    0.09    0.23
  10  -5  -4    0.68    0.32
 -10   5   4   -0.34    0.20
   9  -5  -4    0.49    0.30
   9  -5  -4    0.75    0.28
  -9   5   4    0.51    0.22
  -9   5   4    1.07    0.30
  -8   5   4   25.42    0.79
  -8   5   4   27.72    0.82
   7  -5  -4   35.62    1.00
  -7   5   4   35.89    0.97
  -7   5   4   34.37    0.95
   6  -5  -4    3.42    0.33
   6  -5  -4    3.08    0.30
  -6   5   4    3.25    0.27
  -6   5   4    3.18    0.25
   5  -5  -4    0.47    0.19
   5  -5  -4    0.31    0.18
  -5   5   4    0.30    0.15
  -5   5   4    0.36    0.16
  -5   5   4    0.43    0.17
   4  -5  -4   20.79    0.63
   4  -5  -4   20.11    0.61
  -4   5   4   19.94    0.56
  -4   5   4   20.18    0.59
   3  -5  -4   69.90    1.61
   3  -5  -4   70.55    1.68
  -3   5   4   71.60    1.63
  -3   5   4   69.90    1.61
   2  -5  -4   47.75    1.21
   2  -5  -4   48.10    1.13
   2  -5  -4   48.63    1.17
  -2   5   4   48.40    1.13
  -2   5   4   49.41    1.17
   1  -5  -4   19.68    0.57
   1  -5  -4   19.03    0.59
  -1   5   4   18.78    0.54
  -1   5   4   19.56    0.52
  -1   5   4   19.39    0.52
   0  -5  -4   23.24    0.66
   0  -5  -4   22.91    0.64
   0   5   4   23.96    0.58
   0   5   4   23.68    0.61
   0   5   4   23.47    0.63
  -1  -5  -4  148.14    3.31
  -1  -5  -4  148.16    3.33
   1   5   4  147.66    3.13
   1   5   4  153.43    3.32
   1   5   4  153.12    3.29
  -2  -5  -4  109.00    2.54
  -2  -5  -4  115.32    2.53
   2   5   4  114.38    2.55
   2   5   4  110.81    2.36
   2   5   4  115.04    2.49
  -3  -5  -4  137.93    3.10
  -3  -5  -4  137.64    3.08
   3   5   4  137.61    3.13
   3   5   4  142.06    2.90
  -4  -5  -4   43.75    1.08
  -4  -5  -4   44.27    1.10
  -4  -5  -4   44.58    1.05
   4   5   4   43.05    1.14
   4   5   4   45.14    1.01
  -5  -5  -4    0.10    0.20
  -5  -5  -4    0.19    0.13
  -5  -5  -4    0.02    0.14
   5   5   4    0.47    0.21
   5   5   4    0.08    0.14
  -6  -5  -4   18.18    0.52
  -6  -5  -4   17.58    0.55
  -6  -5  -4   18.35    0.59
   6   5   4   18.02    0.64
   6   5   4   18.78    0.54
  -7  -5  -4   81.95    1.89
  -7  -5  -4   79.51    1.93
  -7  -5  -4   81.58    1.85
   7   5   4   80.43    2.03
   7   5   4   81.87    1.84
  -8  -5  -4   44.10    1.17
  -8  -5  -4   44.49    1.12
   8   5   4   43.08    1.11
   8   5   4   43.69    1.28
  -9  -5  -4    4.80    0.38
  -9  -5  -4    4.52    0.31
   9   5   4    4.73    0.42
   9   5   4    4.67    0.35
 -10  -5  -4   -0.39    0.17
  10   5   4   -0.27    0.22
  10   5   4   -0.35    0.31
 -11  -5  -4    2.76    0.29
  11   5   4    3.21    0.38
  11   5   4    2.32    0.43
 -12  -5  -4    0.89    0.23
 -12  -5  -4    0.90    0.46
  12   5   4    1.44    0.34
  12   5   4    1.18    0.39
 -13  -5  -4    0.74    0.46
 -13  -5  -4    0.46    0.21
  12  -6  -4    0.17    0.33
 -12   6   4   -0.20    0.23
  11  -6  -4    1.39    0.38
 -11   6   4    1.16    0.29
  10  -6  -4    1.74    0.37
 -10   6   4    1.90    0.30
   9  -6  -4    5.02    0.43
  -9   6   4    4.09    0.35
   8  -6  -4    1.57    0.30
   8  -6  -4    1.30    0.31
  -8   6   4    0.98    0.25
  -8   6   4    0.95    0.29
   7  -6  -4    8.49    0.44
   7  -6  -4    8.25    0.47
  -7   6   4    8.15    0.43
  -7   6   4    8.16    0.41
   6  -6  -4   35.12    0.97
   6  -6  -4   33.00    0.98
  -6   6   4   33.97    0.95
  -6   6   4   35.83    0.95
   5  -6  -4   28.24    0.83
   5  -6  -4   28.24    0.83
  -5   6   4   29.59    0.79
  -5   6   4   27.98    0.80
   4  -6  -4   13.07    0.48
   4  -6  -4   14.21    0.51
  -4   6   4   13.77    0.48
  -4   6   4   13.76    0.46
   3  -6  -4   11.23    0.45
   3  -6  -4   11.13    0.41
  -3   6   4   10.96    0.38
  -3   6   4   10.11    0.39
   2  -6  -4    8.58    0.33
   2  -6  -4    8.35    0.39
   2  -6  -4    8.87    0.37
  -2   6   4    8.87    0.33
  -2   6   4    8.71    0.35
   1  -6  -4   77.09    1.86
   1  -6  -4   82.38    1.84
  -1   6   4   77.28    1.81
  -1   6   4   79.45    1.81
  -1   6   4   77.13    1.72
   0  -6  -4   59.45    1.47
   0  -6  -4   62.49    1.47
   0   6   4   59.93    1.43
   0   6   4   61.64    1.35
   0   6   4   60.64    1.43
  -1  -6  -4   60.60    1.47
  -1  -6  -4   58.13    1.46
   1   6   4   62.33    1.45
   1   6   4   61.55    1.33
   1   6   4   62.82    1.44
  -2  -6  -4    0.67    0.20
  -2  -6  -4    0.86    0.17
   2   6   4    0.91    0.15
   2   6   4    0.78    0.11
   2   6   4    0.93    0.18
  -3  -6  -4   50.22    1.21
  -3  -6  -4   47.85    1.23
   3   6   4   48.38    1.24
   3   6   4   49.79    1.07
  -4  -6  -4   63.54    1.51
  -4  -6  -4   62.33    1.53
  -4  -6  -4   62.50    1.47
   4   6   4   66.16    1.38
   4   6   4   61.47    1.56
  -5  -6  -4   34.63    0.92
  -5  -6  -4   37.20    0.90
  -5  -6  -4   35.01    0.96
   5   6   4   36.58    0.84
   5   6   4   34.25    1.00
  -6  -6  -4   11.24    0.42
  -6  -6  -4   11.65    0.39
  -6  -6  -4   11.09    0.48
   6   6   4   11.08    0.50
   6   6   4   12.14    0.39
  -7  -6  -4    0.93    0.25
  -7  -6  -4    0.54    0.20
   7   6   4    0.72    0.20
   7   6   4    0.54    0.30
  -8  -6  -4   13.20    0.49
  -8  -6  -4   14.01    0.57
   8   6   4   12.78    0.61
   8   6   4   13.77    0.49
  -9  -6  -4   23.45    0.78
  -9  -6  -4   22.25    0.70
   9   6   4   22.40    0.86
   9   6   4   23.13    0.70
 -10  -6  -4   11.86    0.57
 -10  -6  -4   10.89    0.47
  10   6   4    9.92    0.61
  10   6   4   11.04    0.49
 -11  -6  -4    2.18    0.29
  11   6   4    2.37    0.42
 -12  -6  -4   -0.18    0.20
  12   6   4   -0.21    0.33
 -13  -6  -4   -0.71    0.41
 -13  -6  -4   -0.02    0.21
  13   6   4   -0.56    0.33
  12  -7  -4    0.94    0.39
 -12   7   4    0.50    0.29
  11  -7  -4   -0.17    0.33
 -11   7   4   -0.10    0.26
  10  -7  -4    0.09    0.30
 -10   7   4   -0.23    0.25
   9  -7  -4    0.20    0.27
  -9   7   4    0.77    0.26
   8  -7  -4    7.86    0.51
   8  -7  -4    8.60    0.46
  -8   7   4    8.11    0.47
  -8   7   4    8.71    0.48
   7  -7  -4   10.30    0.52
   7  -7  -4   11.08    0.49
  -7   7   4   10.17    0.49
  -7   7   4   11.59    0.51
   6  -7  -4    2.10    0.31
   6  -7  -4    2.78    0.32
  -6   7   4    2.09    0.28
  -6   7   4    2.80    0.30
   5  -7  -4   20.89    0.69
   5  -7  -4   21.22    0.69
  -5   7   4   22.18    0.68
  -5   7   4   22.32    0.70
   4  -7  -4   37.32    1.03
   4  -7  -4   38.57    1.00
  -4   7   4   37.31    0.99
  -4   7   4   37.19    1.00
   3  -7  -4   20.17    0.66
   3  -7  -4   19.42    0.60
  -3   7   4   21.12    0.61
  -3   7   4   19.74    0.63
   2  -7  -4   42.60    1.03
   2  -7  -4   42.47    1.12
   2  -7  -4   43.46    1.10
  -2   7   4   41.67    1.08
  -2   7   4   40.99    1.07
   1  -7  -4    5.33    0.26
   1  -7  -4    5.20    0.31
   1  -7  -4    5.93    0.35
  -1   7   4    5.05    0.26
  -1   7   4    5.15    0.29
  -1   7   4    5.82    0.31
   0  -7  -4   27.43    0.79
   0  -7  -4   27.34    0.77
   0   7   4   27.07    0.67
   0   7   4   27.22    0.75
   0   7   4   27.29    0.75
  -1  -7  -4   24.57    0.75
  -1  -7  -4   25.38    0.74
   1   7   4   28.22    0.73
   1   7   4   26.08    0.62
   1   7   4   25.55    0.74
  -2  -7  -4  143.71    3.35
  -2  -7  -4  146.88    3.33
   2   7   4  148.40    3.08
   2   7   4  155.56    3.29
   2   7   4  147.72    3.36
  -3  -7  -4   54.60    1.36
  -3  -7  -4   54.41    1.38
   3   7   4   56.49    1.17
   3   7   4   53.75    1.38
  -4  -7  -4    3.39    0.26
  -4  -7  -4    3.22    0.30
   4   7   4    3.46    0.17
   4   7   4    3.20    0.29
  -5  -7  -4   12.20    0.50
  -5  -7  -4   12.17    0.45
  -5  -7  -4   12.92    0.43
   5   7   4   12.13    0.35
   5   7   4   11.72    0.52
  -6  -7  -4   28.36    0.81
  -6  -7  -4   29.66    0.88
   6   7   4   28.00    0.90
   6   7   4   28.81    0.71
  -7  -7  -4   34.54    1.02
  -7  -7  -4   34.66    0.95
   7   7   4   36.56    1.10
   7   7   4   35.57    0.87
  -8  -7  -4   21.88    0.76
  -8  -7  -4   21.03    0.67
   8   7   4   21.06    0.82
   8   7   4   20.81    0.61
  -9  -7  -4    0.65    0.22
  -9  -7  -4    0.60    0.31
   9   7   4    0.55    0.34
 -10  -7  -4    1.86    0.27
 -10  -7  -4    2.09    0.38
  10   7   4    2.36    0.42
 -11  -7  -4    3.93    0.33
  11   7   4    3.92    0.49
 -12  -7  -4    1.00    0.25
  12   7   4    0.89    0.39
 -13  -7  -4    0.21    0.22
  13   7   4   -0.12    0.37
  11  -8  -4    1.95    0.43
 -11   8   4    1.44    0.35
  10  -8  -4    1.21    0.37
 -10   8   4    1.26    0.33
   9  -8  -4    1.91    0.38
  -9   8   4    1.15    0.30
   8  -8  -4   -0.23    0.26
  -8   8   4    0.07    0.23
  -8   8   4   -0.13    0.28
   7  -8  -4    3.63    0.40
   7  -8  -4    2.45    0.33
  -7   8   4    2.55    0.34
  -7   8   4    2.09    0.31
   6  -8  -4    8.22    0.44
   6  -8  -4    8.65    0.46
  -6   8   4    8.13    0.45
  -6   8   4    8.53    0.45
   5  -8  -4   14.85    0.57
   5  -8  -4   15.47    0.58
  -5   8   4   15.07    0.57
  -5   8   4   16.12    0.58
   4  -8  -4    1.30    0.28
   4  -8  -4    1.85    0.27
  -4   8   4    1.24    0.24
  -4   8   4    0.80    0.25
   3  -8  -4    8.93    0.38
   3  -8  -4    9.16    0.46
  -3   8   4    9.15    0.42
  -3   8   4    9.31    0.43
   2  -8  -4   49.10    1.15
   2  -8  -4   44.94    1.21
   2  -8  -4   47.39    1.24
  -2   8   4   46.40    1.21
  -2   8   4   47.57    1.21
   1  -8  -4  137.98    3.22
   1  -8  -4  142.43    3.21
   1  -8  -4  141.92    3.01
  -1   8   4  142.87    3.18
  -1   8   4  139.03    3.20
   0  -8  -4   32.93    0.96
   0  -8  -4   34.63    0.95
   0   8   4   34.88    0.92
   0   8   4   34.84    0.95
   0   8   4   34.69    0.82
  -1  -8  -4   11.33    0.47
  -1  -8  -4   10.81    0.47
   1   8   4   10.52    0.44
   1   8   4   11.19    0.43
   1   8   4   11.00    0.33
  -2  -8  -4   -0.02    0.18
  -2  -8  -4    0.34    0.22
   2   8   4    0.32    0.15
   2   8   4    0.11    0.19
   2   8   4    0.37    0.09
  -3  -8  -4   25.89    0.80
  -3  -8  -4   27.69    0.84
   3   8   4   29.16    0.61
   3   8   4   28.54    0.84
  -4  -8  -4   59.70    1.49
  -4  -8  -4   59.97    1.53
   4   8   4   60.82    1.55
   4   8   4   60.56    1.26
  -5  -8  -4   13.72    0.56
  -5  -8  -4   13.02    0.50
   5   8   4   13.80    0.56
  -6  -8  -4   -0.14    0.17
  -6  -8  -4    0.26    0.26
   6   8   4    0.03    0.25
  -7  -8  -4    0.09    0.19
  -7  -8  -4    0.31    0.28
   7   8   4   -0.11    0.29
  -8  -8  -4    8.29    0.49
  -8  -8  -4    7.19    0.39
   8   8   4    7.51    0.50
  -9  -8  -4    9.64    0.53
  -9  -8  -4    9.70    0.45
   9   8   4    7.87    0.53
 -10  -8  -4    5.31    0.36
 -10  -8  -4    5.14    0.49
  10   8   4    5.07    0.53
 -11  -8  -4   -0.55    0.35
 -11  -8  -4    0.23    0.22
  11   8   4   -0.33    0.31
 -12  -8  -4    1.21    0.27
  12   8   4    1.58    0.43
 -13  -8  -4    0.87    0.27
  13   8   4    0.78    0.40
  11  -9  -4   -0.26    0.34
 -11   9   4    0.20    0.30
  10  -9  -4    0.13    0.33
 -10   9   4    0.44    0.32
   9  -9  -4    2.03    0.41
  -9   9   4    1.58    0.36
   8  -9  -4    5.10    0.50
  -8   9   4    5.71    0.45
  -8   9   4    5.64    0.46
   7  -9  -4    2.04    0.31
   7  -9  -4    1.60    0.32
  -7   9   4    1.67    0.34
  -7   9   4    0.98    0.29
   6  -9  -4   -0.49    0.22
   6  -9  -4   -0.12    0.23
  -6   9   4   -0.19    0.25
  -6   9   4   -0.27    0.23
   5  -9  -4   10.47    0.50
   5  -9  -4    9.59    0.47
  -5   9   4    9.78    0.50
  -5   9   4   10.43    0.49
   4  -9  -4   31.39    0.94
   4  -9  -4   30.08    0.88
  -4   9   4   31.60    0.94
  -4   9   4   31.01    0.93
   3  -9  -4   16.33    0.63
   3  -9  -4   15.68    0.55
  -3   9   4   14.98    0.58
  -3   9   4   15.98    0.61
   2  -9  -4    1.79    0.28
   2  -9  -4    1.66    0.22
   2  -9  -4    1.48    0.28
  -2   9   4    1.52    0.27
  -2   9   4    1.64    0.26
   1  -9  -4   11.49    0.39
   1  -9  -4   11.03    0.49
   1  -9  -4   11.29    0.49
  -1   9   4    9.90    0.44
  -1   9   4   10.22    0.47
   0  -9  -4   43.89    1.20
   0  -9  -4   44.52    1.21
   0   9   4   44.72    1.04
   0   9   4   46.06    1.18
   0   9   4   45.06    1.20
  -1  -9  -4   46.63    1.25
  -1  -9  -4   46.33    1.24
   1   9   4   46.78    1.20
   1   9   4   46.56    1.05
   1   9   4   47.00    1.25
  -2  -9  -4   17.06    0.61
  -2  -9  -4   17.08    0.63
   2   9   4   18.16    0.57
   2   9   4   17.70    0.63
   2   9   4   17.23    0.41
  -3  -9  -4   19.56    0.66
  -3  -9  -4   19.19    0.68
   3   9   4   18.34    0.67
  -4  -9  -4    1.08    0.23
  -4  -9  -4    0.67    0.28
   4   9   4    0.84    0.28
  -5  -9  -4   46.64    1.28
  -5  -9  -4   48.40    1.34
   5   9   4   51.38    1.38
  -6  -9  -4   31.07    0.92
  -6  -9  -4   31.73    0.99
   6   9   4   31.87    1.02
  -7  -9  -4   22.61    0.74
  -7  -9  -4   23.15    0.82
   7   9   4   21.39    0.83
  -8  -9  -4    3.38    0.32
  -8  -9  -4    3.17    0.41
   8   9   4    2.69    0.42
  -9  -9  -4   -0.25    0.30
  -9  -9  -4    0.13    0.21
   9   9   4   -0.02    0.32
 -10  -9  -4    2.59    0.43
 -10  -9  -4    2.76    0.32
  10   9   4    1.83    0.42
 -11  -9  -4    4.36    0.37
 -11  -9  -4    5.71    0.55
  11   9   4    4.29    0.51
 -12  -9  -4    0.63    0.25
  12   9   4   -0.06    0.37
 -13  -9  -4   -0.22    0.22
  10 -10  -4    0.07    0.34
 -10  10   4    0.75    0.33
   9 -10  -4   -0.19    0.30
  -9  10   4   -0.10    0.29
   8 -10  -4    1.88    0.37
  -8  10   4    1.11    0.34
   7 -10  -4    5.91    0.47
  -7  10   4    6.41    0.47
  -7  10   4    5.82    0.48
   6 -10  -4    7.37    0.45
   6 -10  -4    7.36    0.46
  -6  10   4    8.99    0.53
  -6  10   4    8.77    0.52
   5 -10  -4    2.86    0.35
   5 -10  -4    2.50    0.32
  -5  10   4    2.65    0.36
  -5  10   4    2.19    0.31
   4 -10  -4   -0.90    0.23
   4 -10  -4   -0.30    0.20
  -4  10   4   -0.05    0.22
  -4  10   4   -0.09    0.24
   3 -10  -4    9.20    0.48
   3 -10  -4    9.70    0.43
  -3  10   4    8.79    0.49
  -3  10   4    9.59    0.49
   2 -10  -4   47.09    1.15
   2 -10  -4   46.70    1.29
  -2  10   4   45.87    1.26
  -2  10   4   46.29    1.28
   1 -10  -4   40.74    1.12
   1 -10  -4   38.08    0.95
   1 -10  -4   36.03    1.09
  -1  10   4   37.77    1.10
  -1  10   4   37.95    1.08
   0 -10  -4   12.89    0.55
   0 -10  -4   14.24    0.58
   0  10   4   13.74    0.42
   0  10   4   12.31    0.51
   0  10   4   13.60    0.57
  -1 -10  -4    4.62    0.39
  -1 -10  -4    4.47    0.36
   1  10   4    4.78    0.22
   1  10   4    4.80    0.32
   1  10   4    4.09    0.39
  -2 -10  -4   25.28    0.81
  -2 -10  -4   23.72    0.80
   2  10   4   24.16    0.79
  -3 -10  -4   22.29    0.79
  -3 -10  -4   23.68    0.78
   3  10   4   21.85    0.78
  -4 -10  -4   41.17    1.20
  -4 -10  -4   39.60    1.15
   4  10   4   40.96    1.19
  -5 -10  -4   10.49    0.50
  -5 -10  -4   10.18    0.56
   5  10   4   10.21    0.54
  -6 -10  -4    0.01    0.30
  -6 -10  -4   -0.05    0.21
   6  10   4   -0.43    0.28
  -7 -10  -4    2.88    0.33
  -7 -10  -4    3.84    0.45
   7  10   4    3.12    0.44
  -8 -10  -4    8.87    0.58
  -8 -10  -4    7.68    0.45
   8  10   4    8.39    0.57
  -9 -10  -4    4.58    0.49
  -9 -10  -4    3.64    0.36
   9  10   4    3.71    0.47
 -10 -10  -4    2.84    0.45
 -10 -10  -4    2.57    0.32
  10  10   4    2.76    0.47
 -11 -10  -4    0.73    0.40
 -11 -10  -4   -0.17    0.23
  11  10   4    0.43    0.38
 -12 -10  -4    1.12    0.29
 -12 -10  -4    1.99    0.46
  12  10   4    1.65    0.45
 -10  11   4    0.57    0.36
   9 -11  -4    2.19    0.45
  -9  11   4    1.55    0.40
   8 -11  -4    1.88    0.38
  -8  11   4    1.35    0.36
   7 -11  -4    0.33    0.30
  -7  11   4   -0.26    0.32
  -7  11   4   -0.03    0.27
   6 -11  -4    2.40    0.36
   6 -11  -4    2.56    0.37
  -6  11   4    2.49    0.40
  -6  11   4    2.70    0.40
   5 -11  -4   13.70    0.60
   5 -11  -4   13.04    0.59
  -5  11   4   13.38    0.65
   4 -11  -4   10.86    0.55
   4 -11  -4   10.23    0.49
  -4  11   4    9.83    0.55
  -4  11   4   11.31    0.57
   3 -11  -4   12.82    0.60
   3 -11  -4   12.88    0.52
  -3  11   4   13.42    0.61
  -3  11   4   12.92    0.58
   2 -11  -4    1.89    0.26
   2 -11  -4    1.75    0.34
  -2  11   4    1.88    0.31
  -2  11   4    2.42    0.36
   1 -11  -4    7.91    0.46
   1 -11  -4    8.15    0.49
  -1  11   4    7.46    0.43
  -1  11   4    7.94    0.48
  -1  11   4    7.61    0.36
   0 -11  -4   24.14    0.84
   0 -11  -4   22.28    0.81
   0  11   4   23.15    0.82
   0  11   4   24.18    0.79
   0  11   4   23.29    0.63
  -1 -11  -4   26.03    0.89
  -1 -11  -4   28.58    0.91
   1  11   4   24.66    0.86
  -2 -11  -4    8.07    0.50
  -2 -11  -4    7.79    0.46
   2  11   4    8.22    0.50
  -3 -11  -4   -0.03    0.22
  -3 -11  -4   -0.15    0.27
   3  11   4   -0.15    0.26
  -4 -11  -4    4.90    0.41
  -4 -11  -4    3.98    0.44
   4  11   4    3.98    0.42
  -5 -11  -4   13.97    0.67
  -5 -11  -4   14.92    0.62
   5  11   4   14.26    0.65
  -6 -11  -4   17.54    0.69
  -6 -11  -4   17.74    0.76
   6  11   4   17.55    0.74
  -7 -11  -4    6.35    0.44
  -7 -11  -4    6.51    0.52
   7  11   4    6.74    0.54
  -8 -11  -4   -0.31    0.33
  -8 -11  -4   -0.10    0.21
   8  11   4   -0.28    0.29
  -9 -11  -4    0.93    0.27
  -9 -11  -4    0.29    0.35
   9  11   4    0.26    0.34
 -10 -11  -4    2.83    0.35
 -10 -11  -4    3.47    0.49
  10  11   4    2.53    0.45
 -11 -11  -4    2.52    0.34
 -11 -11  -4    2.92    0.51
 -12 -11  -4    0.35    0.41
 -12 -11  -4   -0.26    0.24
  12  11   4    0.14    0.39
   9 -12  -4   -0.03    0.34
  -9  12   4   -0.28    0.32
   8 -12  -4    1.48    0.37
  -8  12   4    1.12    0.39
   7 -12  -4    3.52    0.44
  -7  12   4    3.84    0.48
  -7  12   4    4.27    0.50
   6 -12  -4    3.74    0.44
  -6  12   4    4.48    0.48
  -6  12   4    3.37    0.46
   5 -12  -4    0.39    0.30
   5 -12  -4   -0.17    0.23
  -5  12   4    0.14    0.32
  -5  12   4   -0.22    0.26
   4 -12  -4    2.78    0.37
   4 -12  -4    2.29    0.32
  -4  12   4    2.68    0.39
  -4  12   4    2.46    0.40
   3 -12  -4    5.98    0.46
   3 -12  -4    4.96    0.35
  -3  12   4    5.50    0.46
  -3  12   4    4.33    0.47
   2 -12  -4   16.90    0.72
   2 -12  -4   17.87    0.60
  -2  12   4   18.55    0.71
  -2  12   4   17.79    0.75
   1 -12  -4   20.99    0.80
  -1  12   4   23.40    0.80
  -1  12   4   21.40    0.64
  -1  12   4   20.64    0.81
   0 -12  -4    1.69    0.33
   0 -12  -4    1.99    0.35
   0  12   4    1.06    0.34
  -1 -12  -4    1.81    0.35
  -1 -12  -4    1.97    0.34
   1  12   4    1.66    0.36
  -2 -12  -4   11.40    0.58
  -2 -12  -4   10.12    0.58
   2  12   4   10.13    0.57
  -3 -12  -4   12.43    0.59
  -3 -12  -4   11.84    0.62
   3  12   4   11.96    0.59
  -4 -12  -4    3.65    0.44
  -4 -12  -4    2.91    0.37
   4  12   4    2.93    0.39
  -5 -12  -4   -0.01    0.32
  -5 -12  -4    0.67    0.27
   5  12   4    0.03    0.30
  -6 -12  -4    0.44    0.26
  -6 -12  -4    0.25    0.34
   6  12   4    0.42    0.30
  -7 -12  -4    5.32    0.42
  -7 -12  -4    5.61    0.54
   7  12   4    5.85    0.53
  -8 -12  -4    4.00    0.50
  -8 -12  -4    2.37    0.36
   8  12   4    3.62    0.49
  -9 -12  -4    1.82    0.33
  -9 -12  -4    2.41    0.47
   9  12   4    1.46    0.42
 -10 -12  -4   -0.18    0.23
 -10 -12  -4    0.54    0.40
  10  12   4    0.40    0.40
 -11 -12  -4    0.98    0.43
 -11 -12  -4    0.38    0.27
  11  12   4    1.01    0.43
   8 -13  -4   -0.07    0.32
  -8  13   4    0.21    0.35
   7 -13  -4    0.21    0.31
  -7  13   4   -0.01    0.33
  -7  13   4   -0.53    0.34
   6 -13  -4    2.39    0.40
  -6  13   4    2.55    0.48
  -6  13   4    2.53    0.43
   5 -13  -4    6.76    0.48
  -5  13   4    6.63    0.56
  -5  13   4    6.65    0.56
   4 -13  -4    3.50    0.43
   4 -13  -4    3.35    0.37
  -4  13   4    3.30    0.43
  -4  13   4    3.13    0.46
   3 -13  -4    0.55    0.31
   3 -13  -4    0.35    0.23
  -3  13   4    0.43    0.30
  -3  13   4   -0.04    0.31
   2 -13  -4   -0.18    0.27
  -2  13   4    0.32    0.32
   1 -13  -4    4.99    0.48
  -1  13   4    4.40    0.47
   0 -13  -4   11.71    0.63
   0  13   4   12.29    0.61
  -1 -13  -4    6.36    0.48
  -1 -13  -4    6.94    0.54
   1  13   4    6.49    0.52
  -2 -13  -4    0.57    0.30
  -2 -13  -4    0.46    0.32
   2  13   4    0.67    0.34
  -3 -13  -4    1.54    0.39
  -3 -13  -4    2.88    0.38
   3  13   4    1.41    0.37
  -4 -13  -4    8.49    0.54
  -4 -13  -4    8.81    0.59
   4  13   4    7.97    0.53
  -5 -13  -4    5.94    0.47
  -5 -13  -4    5.95    0.54
   5  13   4    6.43    0.52
  -6 -13  -4    2.13    0.43
  -6 -13  -4    2.68    0.37
   6  13   4    1.23    0.39
  -7 -13  -4    0.09    0.26
  -7 -13  -4   -0.07    0.35
   7  13   4   -0.70    0.31
  -8 -13  -4    0.89    0.31
  -8 -13  -4    0.88    0.42
   8  13   4    1.16    0.41
  -9 -13  -4    1.96    0.49
  -9 -13  -4    2.05    0.35
   9  13   4    1.60    0.42
 -10 -13  -4    2.88    0.54
 -10 -13  -4    2.26    0.37
  10  13   4    2.29    0.47
 -11 -13  -4    1.13    0.48
 -11 -13  -4    0.68    0.30
  11  13   4    1.13    0.47
   7 -14  -4    0.97    0.37
  -7  14   4    1.22    0.43
   6 -14  -4    0.22    0.30
  -6  14   4    0.49    0.42
  -6  14   4    0.98    0.39
  -5  14   4    0.44    0.39
   4 -14  -4    3.18    0.43
  -4  14   4    2.48    0.46
   3 -14  -4    4.89    0.49
  -3  14   4    4.34    0.54
   2 -14  -4    3.72    0.45
  -2  14   4    3.68    0.49
   1 -14  -4    0.57    0.34
  -1  14   4    0.12    0.34
   0 -14  -4    0.89    0.38
   0  14   4    0.51    0.35
  -1 -14  -4   10.85    0.64
  -1 -14  -4    9.76    0.62
   1  14   4    9.70    0.62
  -2 -14  -4   16.41    0.80
  -2 -14  -4   17.41    0.80
   2  14   4   16.54    0.78
  -3 -14  -4    8.59    0.56
  -3 -14  -4    9.05    0.62
   3  14   4    7.87    0.55
  -4 -14  -4    2.59    0.44
  -4 -14  -4    2.26    0.37
   4  14   4    2.47    0.43
  -5 -14  -4   -0.14    0.34
  -5 -14  -4    0.14    0.29
   5  14   4   -0.56    0.32
  -6 -14  -4    2.87    0.48
  -6 -14  -4    2.63    0.40
   6  14   4    1.73    0.42
  -7 -14  -4    3.62    0.54
  -7 -14  -4    2.86    0.42
   7  14   4    2.07    0.42
  -8 -14  -4    1.95    0.47
  -8 -14  -4    1.50    0.34
   8  14   4    1.52    0.45
  -9 -14  -4   -0.21    0.28
  -9 -14  -4   -0.40    0.41
   9  14   4    0.06    0.39
 -10 -14  -4   -0.34    0.26
 -10 -14  -4   -0.03    0.43
  10  14   4    0.01    0.41
  -6  15   4    2.22    0.52
  -5  15   4    3.16    0.55
  -4  15   4    0.94    0.43
   3 -15  -4    0.21    0.33
  -3  15   4    0.03    0.37
   2 -15  -4    2.33    0.43
  -2  15   4    1.90    0.44
   1 -15  -4    5.36    0.55
  -1  15   4    4.01    0.53
   0 -15  -4    5.37    0.54
   0  15   4    4.08    0.52
  -1 -15  -4    2.61    0.45
   1  15   4    2.50    0.44
  -2 -15  -4   -0.10    0.31
  -2 -15  -4    0.26    0.38
   2  15   4   -0.18    0.34
  -3 -15  -4    2.84    0.48
  -3 -15  -4    2.52    0.42
   3  15   4    2.19    0.45
  -4 -15  -4    5.55    0.58
  -4 -15  -4    5.20    0.54
   4  15   4    4.83    0.53
  -5 -15  -4    4.78    0.57
  -5 -15  -4    4.84    0.52
   5  15   4    4.00    0.52
  -6 -15  -4    0.00    0.38
  -6 -15  -4    0.31    0.32
   6  15   4    0.53    0.39
  -7 -15  -4    0.23    0.39
  -7 -15  -4    0.39    0.32
   7  15   4   -0.17    0.35
  -8 -15  -4    1.20    0.35
  -8 -15  -4    1.28    0.48
   8  15   4    1.30    0.45
  -9 -15  -4    1.73    0.38
  -9 -15  -4    0.58    0.44
   9  15   4    0.53    0.40
  -4  16   4    1.10    0.49
  -3  16   4    0.60    0.42
   2 -16  -4    1.33    0.41
  -2  16   4    0.54    0.41
   1 -16  -4   -1.09    0.31
  -1  16   4   -0.06    0.36
   0 -16  -4    1.32    0.44
   0  16   4    0.76    0.41
  -1 -16  -4    4.89    0.58
   1  16   4    3.86    0.52
  -2 -16  -4    4.43    0.56
   2  16   4    3.84    0.52
  -3 -16  -4    2.04    0.44
  -3 -16  -4    0.99    0.43
   3  16   4    1.52    0.41
  -4 -16  -4   -0.07    0.33
  -4 -16  -4    0.09    0.39
   4  16   4   -0.14    0.36
  -5 -16  -4    1.59    0.49
  -5 -16  -4    0.85    0.38
   5  16   4    1.06    0.43
  -6 -16  -4    2.04    0.43
  -6 -16  -4    2.22    0.53
   6  16   4    2.05    0.48
  -7 -16  -4    3.28    0.58
  -7 -16  -4    2.91    0.45
   7  16   4    3.10    0.53
  -8 -16  -4    0.18    0.34
  -8 -16  -4    0.34    0.45
   8  16   4    0.94    0.45
   2 -17  -4    1.06    0.42
  -2  17   4    1.24    0.45
   1 -17  -4    1.75    0.47
  -1  17   4    1.22    0.47
   0 -17  -4    1.72    0.47
   0  17   4    2.35    0.51
  -1 -17  -4    0.44    0.39
   1  17   4    0.12    0.41
  -2 -17  -4    0.34    0.40
   2  17   4    0.51    0.41
  -3 -17  -4    1.53    0.47
   3  17   4    1.48    0.46
  -4 -17  -4    1.49    0.42
  -4 -17  -4    2.18    0.51
  -5 -17  -4    0.64    0.45
  -5 -17  -4    0.60    0.37
   5  17   4    0.70    0.42
  -6 -17  -4    0.40    0.43
  -6 -17  -4    0.66    0.35
   6  17   4   -0.26    0.36
   5  13  -5   -0.18    0.35
  -5 -13   5   -0.27    0.43
  -5 -13   5    0.12    0.34
   4  13  -5    0.13    0.40
  -4 -13   5    0.47    0.37
  -4 -13   5    0.06    0.39
   3  13  -5    1.40    0.47
  -3 -13   5    0.93    0.42
  -3 -13   5    0.34    0.34
   2  13  -5    0.53    0.43
  -2 -13   5    2.79    0.48
   1  13  -5    0.40    0.43
   0  13  -5    0.05    0.42
  -1  13  -5    1.52    0.51
  -2  13  -5    1.52    0.52
   7  12  -5    0.57    0.38
  -7 -12   5    0.60    0.37
  -7 -12   5    0.53    0.48
   6  12  -5    1.23    0.43
  -6 -12   5    0.88    0.47
  -6 -12   5    0.86    0.37
   5  12  -5    0.84    0.40
  -5 -12   5    0.85    0.37
  -5 -12   5    0.26    0.42
   4  12  -5   -0.19    0.37
  -4 -12   5   -0.23    0.39
  -4 -12   5   -0.13    0.31
   3  12  -5   -0.32    0.36
  -3 -12   5   -0.27    0.30
  -3 -12   5   -0.14    0.37
   2  12  -5    0.98    0.43
  -2 -12   5    0.84    0.41
  -2 -12   5    0.58    0.37
   1  12  -5    2.76    0.53
  -1 -12   5    3.96    0.49
   0  12  -5    2.51    0.51
  -1  12  -5   -0.01    0.38
  -2  12  -5    0.12    0.41
  -3  12  -5    2.07    0.52
  -4  12  -5    1.31    0.48
   8  11  -5    0.54    0.37
  -8 -11   5    0.86    0.48
  -8 -11   5    0.45    0.34
   7  11  -5    0.38    0.36
  -7 -11   5    0.07    0.30
  -7 -11   5    0.07    0.42
   6  11  -5    0.25    0.35
  -6 -11   5    0.44    0.31
  -6 -11   5   -0.05    0.40
   5  11  -5    2.47    0.45
  -5 -11   5    2.30    0.49
  -5 -11   5    2.36    0.41
   4  11  -5    3.02    0.49
  -4 -11   5    3.04    0.52
  -4 -11   5    2.99    0.45
   3  11  -5    2.26    0.44
  -3 -11   5    0.90    0.35
  -3 -11   5    1.69    0.44
   2  11  -5    1.04    0.41
  -2 -11   5    1.11    0.36
  -2 -11   5    0.46    0.38
   1  11  -5   -0.19    0.33
  -1 -11   5   -0.20    0.32
   0  11  -5    1.46    0.45
   0 -11   5    1.95    0.39
  -1  11  -5    5.77    0.63
  -2  11  -5    3.26    0.55
  -3  11  -5    0.45    0.41
  -4  11  -5    0.20    0.38
  -5  11  -5    0.93    0.47
  -6  11  -5    0.10    0.44
   6 -11   5    0.94    0.36
   9  10  -5    0.10    0.36
  -9 -10   5    0.12    0.29
  -9 -10   5   -0.38    0.42
   8  10  -5    0.19    0.34
  -8 -10   5    0.19    0.28
  -8 -10   5    0.06    0.43
   7  10  -5    1.70    0.40
  -7 -10   5    1.39    0.34
  -7 -10   5    2.19    0.52
   6  10  -5    2.80    0.45
  -6 -10   5    3.15    0.55
  -6 -10   5    3.03    0.41
   5  10  -5    1.04    0.37
  -5 -10   5    1.14    0.33
  -5 -10   5    0.79    0.41
   4  10  -5    0.22    0.36
  -4 -10   5   -0.32    0.35
  -4 -10   5    0.18    0.29
   3  10  -5    2.42    0.45
  -3 -10   5    2.20    0.38
  -3 -10   5    3.36    0.48
   2  10  -5    5.02    0.55
  -2 -10   5    3.91    0.48
  -2 -10   5    4.63    0.51
   1  10  -5    5.79    0.58
  -1 -10   5    5.37    0.51
  -1 -10   5    5.57    0.50
   0  10  -5    4.99    0.56
   0 -10   5    5.23    0.46
  -1  10  -5   -0.32    0.34
  -2  10  -5    2.37    0.43
  -3  10  -5    5.34    0.59
   3 -10   5    5.97    0.44
  -4  10  -5    6.81    0.59
   4 -10   5    7.17    0.49
  -5  10  -5    0.61    0.44
   5 -10   5    0.81    0.33
  -6  10  -5    0.14    0.41
   6 -10   5   -0.48    0.28
  -7  10  -5    0.25    0.43
   7 -10   5    0.38    0.33
 -10  -9   5    1.92    0.57
 -10  -9   5    1.13    0.32
   9   9  -5    1.32    0.40
  -9  -9   5    1.72    0.34
  -9  -9   5    2.19    0.53
   8   9  -5    1.84    0.39
  -8  -9   5    1.60    0.47
  -8  -9   5    1.59    0.32
   7   9  -5    0.12    0.31
  -7  -9   5   -0.21    0.40
  -7  -9   5    0.12    0.26
   6   9  -5    0.13    0.32
  -6  -9   5   -0.01    0.26
  -6  -9   5    0.23    0.39
   5   9  -5    4.36    0.47
  -5  -9   5    4.08    0.52
  -5  -9   5    3.62    0.42
   4   9  -5    6.31    0.48
  -4  -9   5    6.95    0.55
  -4  -9   5    6.69    0.49
   3   9  -5    3.24    0.45
  -3  -9   5    3.01    0.44
  -3  -9   5    2.95    0.39
   2   9  -5    0.11    0.32
  -2  -9   5    0.04    0.27
  -2  -9   5    0.09    0.33
   1   9  -5    0.51    0.36
  -1  -9   5   -0.06    0.26
  -1  -9   5   -0.11    0.31
   0   9  -5    3.85    0.48
   0  -9   5    4.70    0.42
   0  -9   5    4.88    0.47
  -1   9  -5    9.59    0.63
   1  -9   5   10.11    0.52
   1  -9   5    9.92    0.46
  -2   9  -5    4.70    0.53
   2  -9   5    4.66    0.37
  -3   9  -5    0.12    0.36
   3  -9   5   -0.24    0.22
  -4   9  -5    1.01    0.37
   4  -9   5    1.65    0.32
  -5   9  -5    6.61    0.57
   5  -9   5    6.05    0.45
  -6   9  -5    4.32    0.49
  -6   9  -5    3.55    0.53
   6  -9   5    4.19    0.46
  -7   9  -5   -0.01    0.41
  -7   9  -5    0.45    0.33
   7  -9   5    0.59    0.33
  -8   9  -5    0.58    0.41
  -8   9  -5   -0.32    0.29
   8  -9   5    0.05    0.31
 -11  -8   5    0.80    0.28
 -11  -8   5    1.67    0.57
 -10  -8   5    0.01    0.44
 -10  -8   5    0.00    0.25
   9   8  -5   -0.24    0.32
  -9  -8   5   -0.37    0.44
  -9  -8   5   -0.05    0.24
   8   8  -5    1.32    0.35
  -8  -8   5    1.28    0.45
  -8  -8   5    0.68    0.27
   7   8  -5    2.94    0.39
  -7  -8   5    2.41    0.35
  -7  -8   5    3.27    0.53
   6   8  -5    3.18    0.40
  -6  -8   5    3.20    0.37
  -6  -8   5    3.29    0.50
   5   8  -5    1.22    0.32
  -5  -8   5    2.06    0.43
  -5  -8   5    1.44    0.31
   4   8  -5    0.60    0.32
  -4  -8   5    0.93    0.28
  -4  -8   5   -0.01    0.36
   3   8  -5    4.79    0.43
  -3  -8   5    5.11    0.49
  -3  -8   5    4.73    0.42
   2   8  -5    5.89    0.46
  -2  -8   5    5.70    0.45
  -2  -8   5    6.03    0.49
   1   8  -5    5.44    0.45
  -1  -8   5    5.28    0.43
  -1  -8   5    5.06    0.41
  -1  -8   5    4.43    0.29
   0   8  -5    0.55    0.34
   0  -8   5    0.34    0.29
   0  -8   5    0.85    0.29
   0  -8   5    0.75    0.23
  -1   8  -5    1.43    0.34
   1  -8   5    1.25    0.25
   1  -8   5    1.77    0.30
   1  -8   5    1.47    0.32
  -2   8  -5   10.24    0.57
   2  -8   5    7.99    0.42
  -3   8  -5    9.82    0.62
   3  -8   5   10.26    0.48
  -4   8  -5    4.43    0.51
  -4   8  -5    4.71    0.42
   4  -8   5    4.87    0.38
  -5   8  -5    0.35    0.36
  -5   8  -5   -0.43    0.24
   5  -8   5   -0.02    0.28
  -6   8  -5    1.75    0.43
  -6   8  -5    1.84    0.38
   6  -8   5    1.48    0.34
  -7   8  -5    6.43    0.54
  -7   8  -5    5.48    0.61
   7  -8   5    5.20    0.52
  -8   8  -5    2.34    0.41
  -8   8  -5    1.79    0.45
   8  -8   5    3.00    0.43
  -9   8  -5    0.40    0.42
  -9   8  -5    0.41    0.34
   9  -8   5    0.14    0.33
 -11  -7   5    0.55    0.51
 -11  -7   5    0.40    0.25
 -10  -7   5    1.39    0.51
 -10  -7   5    1.76    0.29
   9   7  -5    1.96    0.36
  -9  -7   5    1.15    0.47
  -9  -7   5    1.27    0.28
   8   7  -5    1.26    0.34
  -8  -7   5    1.16    0.28
  -8  -7   5    1.16    0.44
   7   7  -5    0.70    0.31
   7   7  -5    0.49    0.36
  -7  -7   5    0.49    0.26
  -7  -7   5    0.48    0.40
   6   7  -5    4.63    0.41
   6   7  -5    4.19    0.47
  -6  -7   5    3.70    0.37
  -6  -7   5    4.33    0.52
   5   7  -5   12.82    0.60
  -5  -7   5   14.74    0.72
  -5  -7   5   13.60    0.60
   4   7  -5   12.96    0.60
  -4  -7   5   12.70    0.66
  -4  -7   5   12.19    0.57
   3   7  -5    1.03    0.32
  -3  -7   5    1.12    0.29
  -3  -7   5    1.08    0.35
   2   7  -5    0.20    0.28
  -2  -7   5   -0.29    0.16
  -2  -7   5   -0.37    0.26
  -2  -7   5   -0.29    0.22
   1   7  -5    3.88    0.42
  -1  -7   5    3.77    0.37
  -1  -7   5    3.31    0.26
  -1  -7   5    3.89    0.40
   0   7  -5   12.77    0.59
   0  -7   5   13.02    0.55
   0  -7   5   12.22    0.57
   0  -7   5   12.78    0.47
  -1   7  -5   11.69    0.60
   1  -7   5   11.18    0.46
   1  -7   5   10.50    0.53
   1  -7   5   11.33    0.48
  -2   7  -5    1.44    0.30
  -2   7  -5    1.11    0.35
   2  -7   5    1.27    0.27
   2  -7   5    1.22    0.25
  -3   7  -5    1.22    0.34
  -3   7  -5    1.55    0.31
   3  -7   5    1.39    0.29
  -4   7  -5    8.81    0.51
  -4   7  -5    8.59    0.58
   4  -7   5    7.91    0.44
  -5   7  -5   10.05    0.55
  -5   7  -5   10.43    0.61
   5  -7   5   10.39    0.55
  -6   7  -5    4.12    0.45
  -6   7  -5    4.60    0.53
   6  -7   5    5.31    0.48
  -7   7  -5   -0.05    0.29
  -7   7  -5   -0.22    0.36
   7  -7   5    0.13    0.27
  -8   7  -5    1.15    0.41
  -8   7  -5    1.32    0.37
   8  -7   5    1.38    0.36
  -9   7  -5    1.47    0.39
  -9   7  -5    2.28    0.49
   9  -7   5    2.26    0.43
 -10   7  -5    1.81    0.48
 -10   7  -5    1.42    0.38
  10  -7   5    1.21    0.39
 -12  -6   5    0.76    0.23
 -12  -6   5    0.90    0.50
 -11  -6   5    0.60    0.23
 -11  -6   5    1.39    0.51
  10   6  -5   -0.54    0.34
 -10  -6   5   -0.10    0.21
   9   6  -5    0.34    0.28
   9   6  -5   -0.08    0.36
  -9  -6   5    0.12    0.22
   8   6  -5    4.10    0.41
   8   6  -5    3.71    0.48
  -8  -6   5    3.74    0.33
   7   6  -5    5.89    0.49
   7   6  -5    4.63    0.41
  -7  -6   5    5.00    0.37
   6   6  -5    4.34    0.38
   6   6  -5    3.94    0.47
  -6  -6   5    5.05    0.38
   5   6  -5    0.28    0.25
   5   6  -5    0.09    0.30
  -5  -6   5   -0.21    0.22
   4   6  -5    7.91    0.47
   4   6  -5    7.98    0.50
  -4  -6   5    8.62    0.46
  -4  -6   5    8.64    0.34
   3   6  -5   11.87    0.56
   3   6  -5   12.57    0.58
  -3  -6   5   13.54    0.43
  -3  -6   5   12.72    0.55
   2   6  -5   10.36    0.52
  -2  -6   5    9.37    0.47
  -2  -6   5   10.04    0.51
  -2  -6   5   10.57    0.39
   1   6  -5    2.06    0.34
  -1  -6   5    2.05    0.23
  -1  -6   5    1.71    0.31
  -1  -6   5    1.72    0.28
   0   6  -5    0.07    0.24
   0  -6   5   -0.09    0.18
   0  -6   5   -0.33    0.23
   0  -6   5   -0.28    0.19
  -1   6  -5   14.37    0.61
  -1   6  -5   13.07    0.53
   1  -6   5   12.88    0.56
   1  -6   5   12.72    0.50
   1  -6   5   11.85    0.46
  -2   6  -5   24.32    0.85
  -2   6  -5   24.81    0.80
   2  -6   5   26.90    0.85
   2  -6   5   25.64    0.73
   2  -6   5   24.43    0.75
  -3   6  -5   10.07    0.50
  -3   6  -5    8.63    0.51
   3  -6   5    8.80    0.44
  -4   6  -5    2.24    0.32
  -4   6  -5    2.36    0.38
   4  -6   5    2.45    0.34
  -5   6  -5    1.96    0.39
  -5   6  -5    2.22    0.34
   5  -6   5    2.78    0.36
  -6   6  -5    8.45    0.52
  -6   6  -5    7.66    0.53
   6  -6   5    8.12    0.48
  -7   6  -5    9.57    0.55
  -7   6  -5   10.95    0.62
   7  -6   5    8.98    0.53
  -8   6  -5    7.40    0.59
  -8   6  -5    6.81    0.53
   8  -6   5    7.22    0.54
  -9   6  -5   -0.08    0.35
  -9   6  -5    0.00    0.29
   9  -6   5   -0.04    0.28
 -10   6  -5   -0.31    0.35
 -10   6  -5   -0.18    0.30
  10  -6   5   -0.24    0.30
 -12  -5   5    0.17    0.19
 -12  -5   5    0.78    0.47
  11   5  -5    1.13    0.43
 -11  -5   5    1.65    0.25
  10   5  -5    0.99    0.40
 -10  -5   5    1.35    0.25
   9   5  -5    1.85    0.41
   9   5  -5    2.37    0.34
  -9  -5   5    1.79    0.26
   8   5  -5   -0.09    0.31
   8   5  -5   -0.31    0.22
  -8  -5   5   -0.07    0.19
   7   5  -5    1.28    0.36
   7   5  -5    1.76    0.31
  -7  -5   5    1.75    0.26
  -7  -5   5    1.98    0.26
   6   5  -5    8.82    0.46
   6   5  -5    7.66    0.48
  -6  -5   5    9.11    0.39
  -6  -5   5    7.81    0.41
   5   5  -5   19.82    0.76
   5   5  -5   19.62    0.68
  -5  -5   5   20.11    0.59
  -5  -5   5   19.91    0.67
   4   5  -5    2.51    0.36
   4   5  -5    3.37    0.34
  -4  -5   5    2.97    0.29
  -4  -5   5    2.95    0.24
   3   5  -5    3.22    0.34
   3   5  -5    3.31    0.36
  -3  -5   5    3.06    0.31
  -3  -5   5    3.37    0.24
   2   5  -5   22.86    0.75
   2   5  -5   24.07    0.77
  -2  -5   5   23.66    0.76
  -2  -5   5   23.19    0.63
   1   5  -5   33.12    0.97
   1   5  -5   34.45    0.90
   1   5  -5   32.45    0.93
  -1  -5   5   32.40    0.84
  -1  -5   5   33.57    0.96
   0   5  -5   44.78    1.22
   0   5  -5   44.76    1.15
   0  -5   5   44.68    1.08
   0  -5   5   44.35    1.16
   0  -5   5   42.03    1.18
  -1   5  -5   38.28    1.03
  -1   5  -5   37.55    1.07
   1  -5   5   38.23    0.99
   1  -5   5   38.12    1.06
   1  -5   5   34.65    0.95
  -2   5  -5   -0.11    0.22
  -2   5  -5   -0.35    0.18
   2  -5   5   -0.25    0.19
   2  -5   5   -0.43    0.18
   2  -5   5   -0.49    0.18
  -3   5  -5    7.46    0.43
  -3   5  -5    8.82    0.48
   3  -5   5    8.43    0.43
   3  -5   5    8.44    0.32
  -4   5  -5   22.16    0.80
  -4   5  -5   22.33    0.76
   4  -5   5   21.70    0.73
  -5   5  -5   21.72    0.76
  -5   5  -5   22.11    0.82
   5  -5   5   19.49    0.72
  -6   5  -5    1.77    0.33
  -6   5  -5    1.88    0.37
   6  -5   5    2.35    0.34
  -7   5  -5   -0.05    0.26
  -7   5  -5   -0.49    0.28
   7  -5   5    0.28    0.26
  -8   5  -5    4.63    0.51
  -8   5  -5    3.78    0.43
   8  -5   5    3.95    0.44
  -9   5  -5    5.30    0.47
  -9   5  -5    6.35    0.56
   9  -5   5    5.56    0.54
 -10   5  -5    3.28    0.51
 -10   5  -5    2.74    0.40
  10  -5   5    3.49    0.47
 -11   5  -5    1.56    0.45
 -11   5  -5    1.55    0.38
  11  -5   5    0.63    0.37
  12   4  -5    0.76    0.43
 -12  -4   5    1.40    0.22
  11   4  -5   -0.52    0.35
 -11  -4   5    0.08    0.19
  10   4  -5   -0.23    0.33
 -10  -4   5    0.06    0.18
   9   4  -5    1.19    0.38
   9   4  -5    2.08    0.33
  -9  -4   5    1.95    0.31
  -9  -4   5    2.01    0.25
   8   4  -5    6.49    0.50
   8   4  -5    6.32    0.41
  -8  -4   5    6.42    0.39
  -8  -4   5    6.29    0.34
   7   4  -5    5.53    0.38
   7   4  -5    5.27    0.45
  -7  -4   5    5.14    0.34
  -7  -4   5    4.93    0.32
   6   4  -5    5.64    0.35
   6   4  -5    5.80    0.45
  -6  -4   5    5.89    0.33
  -6  -4   5    5.41    0.33
   5   4  -5    1.11    0.25
   5   4  -5    0.45    0.28
  -5  -4   5    0.95    0.20
  -5  -4   5    0.67    0.20
   4   4  -5   24.39    0.74
   4   4  -5   24.79    0.80
  -4  -4   5   24.19    0.66
  -4  -4   5   23.92    0.72
   3   4  -5   33.88    0.96
   3   4  -5   33.23    0.93
  -3  -4   5   30.59    0.90
  -3  -4   5   35.22    0.84
   2   4  -5    6.79    0.40
   2   4  -5    7.28    0.38
  -2  -4   5    6.94    0.30
  -2  -4   5    6.90    0.37
   1   4  -5    1.78    0.25
   1   4  -5    1.40    0.20
   1   4  -5    1.55    0.25
  -1  -4   5    1.43    0.19
  -1  -4   5    1.25    0.24
   0   4  -5   14.81    0.49
   0   4  -5   14.86    0.53
   0   4  -5   15.10    0.50
   0  -4   5   15.10    0.47
   0  -4   5   13.55    0.53
  -1   4  -5   57.74    1.49
  -1   4  -5   60.01    1.46
   1  -4   5   61.15    1.49
   1  -4   5   60.29    1.42
   1  -4   5   55.10    1.37
  -2   4  -5   59.90    1.53
  -2   4  -5   61.96    1.50
   2  -4   5   60.59    1.51
   2  -4   5   57.37    1.39
   2  -4   5   58.74    1.42
  -3   4  -5   26.04    0.80
  -3   4  -5   26.96    0.85
   3  -4   5   25.22    0.66
   3  -4   5   27.56    0.81
   3  -4   5   27.26    0.79
  -4   4  -5    3.11    0.34
  -4   4  -5    2.95    0.36
   4  -4   5    3.06    0.32
  -5   4  -5    3.41    0.41
  -5   4  -5    3.51    0.36
   5  -4   5    3.72    0.36
  -6   4  -5   13.76    0.59
  -6   4  -5   14.17    0.66
   6  -4   5   13.99    0.59
  -7   4  -5   14.86    0.70
  -7   4  -5   13.96    0.61
   7  -4   5   15.81    0.67
  -8   4  -5    3.30    0.39
  -8   4  -5    4.08    0.47
   8  -4   5    3.60    0.41
  -9   4  -5   -0.31    0.25
  -9   4  -5    0.20    0.36
   9  -4   5   -0.18    0.27
 -10   4  -5    1.32    0.34
 -10   4  -5    1.23    0.39
  10  -4   5    1.07    0.33
 -11   4  -5    3.18    0.51
 -11   4  -5    2.48    0.39
  11  -4   5    2.57    0.45
  12   3  -5    0.61    0.39
 -12  -3   5    0.62    0.18
  11   3  -5    1.95    0.42
 -11  -3   5    1.94    0.22
  10   3  -5    1.24    0.40
 -10  -3   5    1.65    0.21
 -10  -3   5    1.58    0.33
   9   3  -5    0.79    0.36
   9   3  -5    1.18    0.28
  -9  -3   5    1.05    0.19
  -9  -3   5    1.08    0.30
   8   3  -5    0.06    0.22
   8   3  -5    0.18    0.31
  -8  -3   5   -0.04    0.23
  -8  -3   5   -0.01    0.16
   7   3  -5    3.31    0.30
   7   3  -5    3.08    0.40
  -7  -3   5    3.43    0.33
  -7  -3   5    2.97    0.24
   6   3  -5   10.00    0.53
   6   3  -5   11.00    0.44
  -6  -3   5   10.71    0.44
  -6  -3   5   11.20    0.41
   5   3  -5   15.61    0.52
   5   3  -5   15.09    0.61
  -5  -3   5   16.18    0.51
  -5  -3   5   16.81    0.53
  -5  -3   5   15.36    0.50
   4   3  -5    2.62    0.31
   4   3  -5    3.16    0.27
  -4  -3   5    2.26    0.23
  -4  -3   5    3.40    0.24
  -4  -3   5    2.74    0.25
   3   3  -5   14.42    0.49
   3   3  -5   14.42    0.55
  -3  -3   5   14.10    0.49
  -3  -3   5   14.74    0.45
   2   3  -5   51.91    1.29
   2   3  -5   53.08    1.31
  -2  -3   5   52.88    1.19
  -2  -3   5   47.14    1.26
   1   3  -5   36.18    0.90
   1   3  -5   35.18    0.94
   1   3  -5   35.24    0.94
  -1  -3   5   33.89    0.86
  -1  -3   5   36.77    0.95
   0   3  -5   28.13    0.80
   0   3  -5   28.80    0.78
   0   3  -5   27.81    0.76
   0  -3   5   27.74    0.79
   0  -3   5   28.32    0.73
  -1   3  -5    2.57    0.25
  -1   3  -5    3.00    0.26
  -1   3  -5    2.67    0.24
   1  -3   5    2.69    0.23
   1  -3   5    3.09    0.27
  -2   3  -5   21.73    0.67
  -2   3  -5   19.04    0.63
   2  -3   5   21.12    0.62
   2  -3   5   21.14    0.67
   2  -3   5   19.61    0.56
  -3   3  -5   59.01    1.51
  -3   3  -5   61.06    1.49
   3  -3   5   62.82    1.49
   3  -3   5   58.48    1.33
   3  -3   5   57.38    1.42
  -4   3  -5   72.47    1.78
  -4   3  -5   74.40    1.84
   4  -3   5   71.71    1.73
  -5   3  -5   26.27    0.82
  -5   3  -5   25.85    0.85
   5  -3   5   25.66    0.80
  -6   3  -5    5.39    0.37
  -6   3  -5    5.75    0.42
   6  -3   5    6.48    0.41
  -7   3  -5    0.48    0.25
  -7   3  -5    0.29    0.32
   7  -3   5    0.82    0.28
  -8   3  -5    9.80    0.50
  -8   3  -5    8.31    0.54
   8  -3   5    9.49    0.53
  -9   3  -5    3.83    0.39
  -9   3  -5    4.72    0.51
   9  -3   5    4.22    0.45
 -10   3  -5    2.46    0.37
 -10   3  -5    3.43    0.48
  10  -3   5    3.42    0.45
 -11   3  -5    0.22    0.38
 -11   3  -5    0.77    0.31
  11  -3   5    0.11    0.31
 -12   3  -5    0.13    0.29
 -12   3  -5   -0.11    0.36
  12  -3   5    0.29    0.35
  13   2  -5    0.09    0.37
 -13  -2   5    0.46    0.14
  12   2  -5   -0.15    0.36
 -12  -2   5    0.56    0.36
 -12  -2   5    0.51    0.16
  11   2  -5   -0.60    0.31
 -11  -2   5    0.11    0.15
 -11  -2   5   -0.24    0.31
  10   2  -5    1.96    0.39
 -10  -2   5    1.80    0.36
 -10  -2   5    1.77    0.19
   9   2  -5    4.63    0.47
   9   2  -5    4.97    0.37
  -9  -2   5    4.75    0.25
  -9  -2   5    5.56    0.42
   8   2  -5    7.46    0.39
   8   2  -5    7.40    0.50
  -8  -2   5    7.51    0.44
  -8  -2   5    7.12    0.30
   7   2  -5    3.19    0.39
   7   2  -5    3.03    0.28
  -7  -2   5    2.82    0.21
  -7  -2   5    3.19    0.23
  -7  -2   5    3.04    0.32
   6   2  -5    0.55    0.18
   6   2  -5    0.17    0.26
  -6  -2   5    0.04    0.20
  -6  -2   5    0.22    0.13
  -6  -2   5    0.32    0.15
   5   2  -5    5.00    0.27
   5   2  -5    4.49    0.37
  -5  -2   5    4.96    0.25
  -5  -2   5    4.85    0.26
  -5  -2   5    4.92    0.29
   4   2  -5   39.50    1.00
   4   2  -5   39.81    1.09
  -4  -2   5   39.79    0.99
  -4  -2   5   39.26    0.99
  -4  -2   5   42.32    1.00
   3   2  -5   29.25    0.77
   3   2  -5   28.27    0.84
  -3  -2   5   30.70    0.77
  -3  -2   5   29.65    0.76
  -3  -2   5   28.26    0.77
   2   2  -5    0.49    0.21
   2   2  -5    1.21    0.19
  -2  -2   5    0.85    0.16
  -2  -2   5    0.82    0.16
   1   2  -5   20.06    0.55
   1   2  -5   18.30    0.58
   1   2  -5   20.26    0.58
  -1  -2   5   18.80    0.58
  -1  -2   5   19.53    0.54
   0   2  -5   76.29    1.75
   0   2  -5   73.66    1.77
   0   2  -5   74.94    1.75
   0  -2   5   75.92    1.68
   0  -2   5   78.42    1.78
  -1   2  -5  117.02    2.57
  -1   2  -5  118.91    2.62
  -1   2  -5  113.12    2.63
   1  -2   5  117.95    2.51
   1  -2   5  112.60    2.62
  -2   2  -5   28.68    0.71
  -2   2  -5   29.11    0.81
  -2   2  -5   29.73    0.83
   2  -2   5   30.89    0.83
   2  -2   5   28.91    0.77
  -3   2  -5    3.26    0.30
  -3   2  -5    2.48    0.26
   3  -2   5    2.68    0.27
   3  -2   5    2.69    0.15
   3  -2   5    2.72    0.25
  -4   2  -5    5.43    0.38
  -4   2  -5    4.30    0.31
   4  -2   5    5.55    0.32
   4  -2   5    4.86    0.31
  -5   2  -5   30.79    0.87
  -5   2  -5   29.66    0.92
   5  -2   5   28.11    0.85
  -6   2  -5   31.58    0.92
  -6   2  -5   31.26    0.99
   6  -2   5   30.85    0.93
  -7   2  -5   33.47    0.99
  -7   2  -5   32.40    1.05
   7  -2   5   35.15    1.02
  -8   2  -5    4.44    0.46
  -8   2  -5    4.30    0.38
   8  -2   5    4.32    0.42
  -9   2  -5    0.29    0.31
  -9   2  -5    0.85    0.27
   9  -2   5    0.84    0.30
 -10   2  -5    1.09    0.30
 -10   2  -5    1.44    0.41
  10  -2   5    1.30    0.34
 -11   2  -5    2.53    0.47
 -11   2  -5    2.12    0.34
  11  -2   5    1.72    0.38
 -12   2  -5    0.63    0.30
 -12   2  -5    0.80    0.44
  12  -2   5    1.01    0.37
 -13  -1   5   -0.05    0.13
 -13  -1   5   -0.31    0.33
  12   1  -5    0.33    0.35
 -12  -1   5    0.88    0.37
 -12  -1   5    0.46    0.15
  11   1  -5    0.59    0.34
 -11  -1   5    1.33    0.38
 -11  -1   5    1.27    0.16
  10   1  -5    0.06    0.33
 -10  -1   5   -0.18    0.28
 -10  -1   5   -0.03    0.13
   9   1  -5   -0.27    0.22
   9   1  -5    0.09    0.30
  -9  -1   5   -0.18    0.25
  -9  -1   5    0.00    0.13
   8   1  -5    5.58    0.33
   8   1  -5    5.00    0.43
  -8  -1   5    4.81    0.40
  -8  -1   5    4.44    0.23
  -8  -1   5    4.91    0.25
   7   1  -5    8.10    0.49
   7   1  -5    8.59    0.38
  -7  -1   5    8.98    0.32
  -7  -1   5    8.24    0.30
  -7  -1   5    9.31    0.46
   6   1  -5   13.54    0.57
   6   1  -5   13.56    0.45
  -6  -1   5   13.15    0.41
  -6  -1   5   13.04    0.40
  -6  -1   5   13.75    0.51
   5   1  -5   12.27    0.40
   5   1  -5   11.58    0.51
  -5  -1   5   12.27    0.39
  -5  -1   5   11.84    0.38
  -5  -1   5   12.07    0.46
   4   1  -5   12.88    0.51
   4   1  -5   12.45    0.40
  -4  -1   5   12.16    0.39
  -4  -1   5   13.82    0.46
  -4  -1   5   12.60    0.40
   3   1  -5   81.31    1.94
   3   1  -5   83.38    1.87
  -3  -1   5   83.56    1.83
  -3  -1   5   80.95    1.86
  -3  -1   5   82.01    1.86
   2   1  -5  113.76    2.57
   2   1  -5  115.15    2.62
  -2  -1   5  116.14    2.56
  -2  -1   5  115.78    2.48
   1   1  -5  117.61    2.56
   1   1  -5  113.84    2.57
   1   1  -5  113.45    2.59
  -1  -1   5  116.40    2.48
  -1  -1   5  116.34    2.58
   0   1  -5   25.11    0.66
   0   1  -5   23.38    0.64
   0   1  -5   22.59    0.63
   0  -1   5   23.93    0.66
   0  -1   5   24.37    0.62
  -1   1  -5   12.16    0.42
  -1   1  -5   12.16    0.38
  -1   1  -5   12.02    0.41
   1  -1   5   13.11    0.43
   1  -1   5   12.10    0.40
  -2   1  -5   99.99    2.17
  -2   1  -5  100.19    2.26
  -2   1  -5   98.84    2.28
   2  -1   5   98.59    2.25
   2  -1   5   97.78    2.17
  -3   1  -5  131.85    2.93
  -3   1  -5  128.13    2.97
   3  -1   5  127.78    2.83
   3  -1   5  132.70    2.91
  -4   1  -5   71.73    1.77
  -4   1  -5   71.92    1.72
   4  -1   5   72.04    1.67
  -5   1  -5    8.73    0.40
  -5   1  -5    8.70    0.46
   5  -1   5    8.73    0.41
  -6   1  -5    0.24    0.27
  -6   1  -5    0.35    0.21
   6  -1   5    0.35    0.23
  -7   1  -5    7.23    0.50
  -7   1  -5    6.72    0.39
   7  -1   5    7.57    0.44
  -8   1  -5   23.09    0.86
  -8   1  -5   23.12    0.76
   8  -1   5   23.90    0.81
  -9   1  -5   10.41    0.59
  -9   1  -5   10.02    0.49
   9  -1   5   10.95    0.56
 -10   1  -5    1.46    0.30
 -10   1  -5    1.76    0.39
  10  -1   5    1.55    0.35
 -11   1  -5   -0.25    0.36
 -11   1  -5   -0.07    0.24
  11  -1   5   -0.02    0.29
 -12   1  -5    1.03    0.43
 -12   1  -5    0.17    0.25
  12  -1   5    0.52    0.33
 -13   1  -5    1.08    0.30
 -13   0   5   -0.12    0.34
 -13   0   5   -0.08    0.14
  12   0  -5    0.59    0.35
 -12   0   5   -0.04    0.14
 -12   0   5    0.21    0.35
  11   0  -5    1.55    0.38
 -11   0   5    0.96    0.36
  10   0  -5    3.22    0.43
 -10   0   5    3.16    0.21
 -10   0   5    3.33    0.41
   9   0  -5    6.61    0.49
  -9   0   5    6.04    0.26
  -9   0   5    5.79    0.43
   8   0  -5    1.67    0.33
   8   0  -5    1.72    0.25
  -8   0   5    1.22    0.30
  -8   0   5    1.45    0.16
  -8   0   5    1.79    0.18
   7   0  -5    3.43    0.26
   7   0  -5    2.77    0.36
  -7   0   5    3.06    0.21
  -7   0   5    2.93    0.32
   6   0  -5    7.79    0.43
   6   0  -5    7.93    0.32
  -6   0   5    7.55    0.28
  -6   0   5    7.35    0.29
  -6   0   5    7.05    0.40
   5   0  -5   83.80    1.90
   5   0  -5   80.59    2.01
  -5   0   5   87.76    1.89
  -5   0   5   83.09    1.87
  -5   0   5   84.83    1.93
   4   0  -5  166.19    3.83
   4   0  -5  168.65    3.72
  -4   0   5  170.34    3.66
  -4   0   5  176.76    3.72
  -4   0   5  171.43    3.71
   3   0  -5   63.18    1.55
   3   0  -5   66.06    1.45
  -3   0   5   65.61    1.48
  -3   0   5   63.06    1.47
  -3   0   5   64.63    1.48
   2   0  -5    5.32    0.22
   2   0  -5    5.41    0.30
  -2   0   5    5.23    0.24
  -2   0   5    5.43    0.28
   1   0  -5    0.13    0.15
   1   0  -5    0.21    0.12
   1   0  -5    0.10    0.11
  -1   0   5    0.02    0.11
  -1   0   5    0.01    0.13
   0   0  -5   66.26    1.54
   0   0  -5   70.40    1.56
   0   0  -5   66.00    1.53
   0   0   5   66.35    1.50
   0   0   5   68.54    1.56
  -1   0  -5  200.70    4.42
  -1   0  -5  201.55    4.39
  -1   0  -5  202.70    4.44
   1   0   5  205.92    4.42
   1   0   5  203.43    4.25
  -2   0  -5   46.58    1.07
  -2   0  -5   46.00    1.16
  -2   0  -5   47.37    1.15
   2   0   5   46.96    1.10
   2   0   5   48.02    1.14
  -3   0  -5    9.37    0.40
  -3   0  -5    9.38    0.25
  -3   0  -5    9.11    0.36
   3   0   5    9.32    0.36
   3   0   5    9.73    0.35
  -4   0  -5   36.93    1.00
  -4   0  -5   35.80    0.94
   4   0   5   36.30    0.94
  -5   0  -5   59.28    1.55
  -5   0  -5   62.17    1.49
   5   0   5   61.92    1.47
  -6   0  -5   29.18    0.83
  -6   0  -5   29.97    0.93
   6   0   5   29.44    0.86
  -7   0  -5   16.55    0.67
  -7   0  -5   17.17    0.59
   7   0   5   16.16    0.61
  -8   0  -5    1.55    0.37
  -8   0  -5    1.96    0.28
   8   0   5    1.68    0.32
  -9   0  -5    3.20    0.32
  -9   0  -5    3.40    0.45
   9   0   5    3.64    0.40
 -10   0  -5    6.24    0.41
 -10   0  -5    6.42    0.55
  10   0   5    7.12    0.50
 -11   0  -5    3.02    0.35
 -11   0  -5    3.49    0.51
  11   0   5    3.81    0.45
 -12   0  -5    0.14    0.37
 -12   0  -5    0.25    0.26
  12   0   5    0.31    0.35
 -13   0  -5   -0.28    0.40
 -13   0  -5    0.21    0.26
  13   0   5   -0.22    0.33
 -13   1   5    0.42    0.37
  12  -1  -5    2.37    0.42
 -12   1   5    2.84    0.47
 -12   1   5    1.97    0.22
  11  -1  -5    1.54    0.38
 -11   1   5    0.92    0.19
 -11   1   5    1.00    0.37
  10  -1  -5   -0.22    0.28
 -10   1   5   -0.21    0.27
 -10   1   5    0.08    0.15
   9  -1  -5    0.16    0.28
  -9   1   5    0.56    0.15
  -9   1   5    0.22    0.29
   8  -1  -5    8.23    0.50
  -8   1   5    7.49    0.46
  -8   1   5    8.43    0.42
  -8   1   5    7.87    0.30
  -8   1   5    7.97    0.32
   7  -1  -5    2.49    0.33
  -7   1   5    2.92    0.29
  -7   1   5    2.80    0.21
  -7   1   5    2.55    0.32
  -7   1   5    2.74    0.19
   6  -1  -5    7.40    0.42
   6  -1  -5    7.46    0.30
  -6   1   5    6.96    0.38
  -6   1   5    7.53    0.29
  -6   1   5    7.18    0.27
   5  -1  -5    8.82    0.30
   5  -1  -5    8.62    0.42
  -5   1   5    8.40    0.39
  -5   1   5    8.53    0.32
  -5   1   5    8.43    0.29
   4  -1  -5   39.34    0.92
   4  -1  -5   39.25    1.05
  -4   1   5   41.12    0.96
  -4   1   5   39.09    1.00
   3  -1  -5  223.64    5.20
   3  -1  -5  240.94    5.10
  -3   1   5  248.52    5.13
  -3   1   5  238.44    4.99
  -3   1   5  235.61    5.11
   2  -1  -5  178.00    3.81
   2  -1  -5  174.70    3.90
  -2   1   5  178.18    3.84
  -2   1   5  176.77    3.74
   1  -1  -5   59.56    1.31
   1  -1  -5   60.36    1.35
   1  -1  -5   56.47    1.37
  -1   1   5   59.49    1.33
  -1   1   5   58.30    1.35
   0  -1  -5   65.25    1.48
   0  -1  -5   65.09    1.50
   0  -1  -5   65.90    1.51
   0   1   5   66.47    1.50
   0   1   5   65.51    1.46
  -1  -1  -5   13.33    0.43
  -1  -1  -5   13.09    0.41
  -1  -1  -5   13.48    0.39
   1   1   5   14.01    0.41
   1   1   5   14.34    0.42
  -2  -1  -5  178.32    3.89
  -2  -1  -5  182.55    3.98
  -2  -1  -5  178.19    3.94
   2   1   5  181.89    3.79
   2   1   5  179.00    3.92
  -3  -1  -5   89.76    2.13
  -3  -1  -5   93.09    2.10
  -3  -1  -5   92.21    2.01
   3   1   5   92.44    2.07
   3   1   5   92.19    2.02
  -4  -1  -5   67.11    1.45
  -4  -1  -5   65.41    1.63
  -4  -1  -5   65.96    1.57
   4   1   5   66.42    1.53
  -5  -1  -5    0.29    0.16
  -5  -1  -5    0.28    0.06
  -5  -1  -5    0.17    0.21
   5   1   5   -0.02    0.17
  -6  -1  -5    8.76    0.47
  -6  -1  -5    8.16    0.37
   6   1   5    8.40    0.40
  -7  -1  -5   13.47    0.50
  -7  -1  -5   13.59    0.62
   7   1   5   13.44    0.56
  -8  -1  -5   17.95    0.61
  -8  -1  -5   17.57    0.75
   8   1   5   18.00    0.68
  -9  -1  -5    5.61    0.53
  -9  -1  -5    4.14    0.34
   9   1   5    4.88    0.40
 -10  -1  -5    0.24    0.36
 -10  -1  -5    0.23    0.23
  10   1   5    0.10    0.27
 -11  -1  -5    2.36    0.47
 -11  -1  -5    1.32    0.28
  11   1   5    2.20    0.38
 -12  -1  -5    2.97    0.35
 -12  -1  -5    4.09    0.56
  12   1   5    3.81    0.46
 -13  -1  -5    1.97    0.32
 -13  -1  -5    3.11    0.55
  13   1   5    2.31    0.43
 -13   2   5    0.08    0.37
 -13   2   5    0.06    0.19
 -12   2   5    0.10    0.34
 -12   2   5    0.35    0.19
  11  -2  -5    3.84    0.44
  11  -2  -5    2.46    0.41
 -11   2   5    2.58    0.25
 -11   2   5    2.53    0.43
  10  -2  -5    4.48    0.45
  10  -2  -5    4.25    0.43
 -10   2   5    4.71    0.28
   9  -2  -5    5.76    0.42
   9  -2  -5    5.65    0.46
  -9   2   5    5.85    0.29
   8  -2  -5   -0.19    0.25
   8  -2  -5   -0.13    0.24
  -8   2   5    0.17    0.15
  -8   2   5    0.00    0.21
   7  -2  -5    8.97    0.48
  -7   2   5    9.26    0.40
  -7   2   5    8.96    0.34
  -7   2   5    8.70    0.33
   6  -2  -5   10.65    0.47
   6  -2  -5    9.95    0.45
  -6   2   5   10.16    0.36
  -6   2   5   10.73    0.35
  -6   2   5   10.62    0.47
  -6   2   5   11.47    0.39
   5  -2  -5   52.43    1.34
  -5   2   5   52.65    1.24
  -5   2   5   53.87    1.23
  -5   2   5   52.47    1.30
  -5   2   5   52.52    1.23
   4  -2  -5  102.39    2.36
  -4   2   5  103.40    2.24
  -4   2   5   99.76    2.26
  -4   2   5  100.95    2.27
  -4   2   5  104.78    2.28
   3  -2  -5   25.85    0.75
  -3   2   5   26.34    0.68
  -3   2   5   26.15    0.72
  -3   2   5   28.27    0.70
  -3   2   5   27.51    0.60
   2  -2  -5   75.62    1.78
  -2   2   5   77.55    1.71
  -2   2   5   76.69    1.72
   1  -2  -5  107.74    2.40
   1  -2  -5  109.36    2.50
   1  -2  -5  114.74    2.47
  -1   2   5  112.01    2.40
  -1   2   5  114.77    2.47
   0  -2  -5  109.07    2.34
   0  -2  -5  102.53    2.33
   0  -2  -5  106.56    2.30
   0   2   5  100.84    2.32
   0   2   5  104.53    2.25
  -1  -2  -5  435.90    9.39
  -1  -2  -5  437.30    9.45
  -1  -2  -5  442.84    9.41
   1   2   5  439.77    9.37
  -2  -2  -5  108.23    2.50
  -2  -2  -5  111.86    2.44
  -2  -2  -5  112.90    2.48
   2   2   5  111.20    2.37
   2   2   5  109.55    2.45
  -3  -2  -5    0.15    0.13
  -3  -2  -5    0.27    0.12
   3   2   5    0.19    0.14
   3   2   5   -0.16    0.17
  -4  -2  -5   88.04    1.98
  -4  -2  -5   87.18    2.12
  -4  -2  -5   92.34    2.06
   4   2   5   90.22    1.99
   4   2   5   90.89    2.11
  -5  -2  -5   56.00    1.46
  -5  -2  -5   59.99    1.36
  -5  -2  -5   55.86    1.29
  -5  -2  -5   56.57    1.38
   5   2   5   56.48    1.35
  -6  -2  -5    8.38    0.47
  -6  -2  -5    9.02    0.38
  -6  -2  -5    9.50    0.37
  -6  -2  -5    8.79    0.30
   6   2   5    9.27    0.40
  -7  -2  -5    2.40    0.38
  -7  -2  -5    2.22    0.25
   7   2   5    2.33    0.29
  -8  -2  -5    3.71    0.30
  -8  -2  -5    4.64    0.48
   8   2   5    4.20    0.38
  -9  -2  -5    3.91    0.31
  -9  -2  -5    4.07    0.46
   9   2   5    4.72    0.42
 -10  -2  -5    5.17    0.36
 -10  -2  -5    6.14    0.50
  10   2   5    5.74    0.45
 -11  -2  -5    4.73    0.37
 -11  -2  -5    4.76    0.55
  11   2   5    5.10    0.43
 -12  -2  -5   -0.23    0.23
 -12  -2  -5    0.36    0.42
  12   2   5    0.46    0.30
 -13  -2  -5    0.04    0.25
 -13  -2  -5    0.58    0.45
  13   2   5   -0.01    0.31
 -13   3   5    0.60    0.39
 -13   3   5    0.89    0.23
  12  -3  -5    2.46    0.45
 -12   3   5    2.23    0.27
 -12   3   5    1.71    0.42
  11  -3  -5    0.51    0.35
  11  -3  -5    0.72    0.35
 -11   3   5    0.26    0.21
  10  -3  -5    0.53    0.32
  10  -3  -5    0.34    0.30
 -10   3   5    0.36    0.20
   9  -3  -5    5.18    0.42
   9  -3  -5    5.65    0.46
  -9   3   5    5.20    0.31
   8  -3  -5   11.09    0.54
   8  -3  -5   11.32    0.53
  -8   3   5   11.29    0.41
  -8   3   5   11.28    0.46
   7  -3  -5    4.58    0.39
   7  -3  -5    4.22    0.38
  -7   3   5    4.37    0.28
  -7   3   5    4.22    0.30
  -7   3   5    4.07    0.26
   6  -3  -5    6.97    0.39
   6  -3  -5    7.44    0.41
  -6   3   5    7.14    0.30
  -6   3   5    7.50    0.31
  -6   3   5    6.96    0.31
   5  -3  -5    4.60    0.31
   5  -3  -5    4.12    0.32
  -5   3   5    4.44    0.22
  -5   3   5    4.82    0.26
  -5   3   5    4.40    0.24
   4  -3  -5    3.25    0.28
  -4   3   5    2.85    0.15
  -4   3   5    3.45    0.29
  -4   3   5    3.14    0.23
  -4   3   5    2.76    0.20
   3  -3  -5  143.56    3.23
  -3   3   5  145.13    3.18
  -3   3   5  144.54    3.11
  -3   3   5  143.68    3.17
  -3   3   5  144.85    3.10
   2  -3  -5  117.30    2.65
  -2   3   5  118.12    2.60
  -2   3   5  117.86    2.55
   1  -3  -5   11.57    0.41
   1  -3  -5   12.55    0.39
  -1   3   5   11.78    0.39
  -1   3   5   11.69    0.28
  -1   3   5   11.91    0.38
   0  -3  -5   28.56    0.74
   0  -3  -5   27.30    0.73
   0   3   5   28.98    0.67
   0   3   5   28.60    0.70
   0   3   5   27.92    0.72
  -1  -3  -5   76.98    1.75
  -1  -3  -5   76.90    1.76
   1   3   5   78.58    1.73
   1   3   5   77.19    1.67
   1   3   5   74.71    1.73
  -2  -3  -5  113.90    2.55
  -2  -3  -5  115.94    2.56
   2   3   5  114.82    2.53
   2   3   5  113.49    2.44
   2   3   5  114.12    2.57
  -3  -3  -5  143.01    3.18
  -3  -3  -5  145.75    3.21
   3   3   5  143.89    3.06
   3   3   5  146.29    3.25
  -4  -3  -5   14.29    0.47
  -4  -3  -5   14.39    0.43
   4   3   5   14.24    0.50
   4   3   5   14.24    0.45
  -5  -3  -5   15.05    0.45
  -5  -3  -5   13.65    0.43
  -5  -3  -5   14.07    0.48
   5   3   5   14.04    0.54
   5   3   5   13.82    0.47
  -6  -3  -5   14.87    0.44
  -6  -3  -5   14.18    0.49
  -6  -3  -5   14.82    0.47
   6   3   5   14.21    0.49
   6   3   5   13.36    0.56
  -7  -3  -5   35.57    0.96
  -7  -3  -5   36.45    0.91
   7   3   5   36.22    0.98
   7   3   5   35.94    1.08
  -8  -3  -5    8.89    0.54
  -8  -3  -5    8.52    0.40
   8   3   5    7.93    0.49
   8   3   5    9.03    0.46
  -9  -3  -5   -0.19    0.19
  -9  -3  -5    0.18    0.34
   9   3   5   -0.11    0.23
 -10  -3  -5    0.45    0.22
 -10  -3  -5    1.11    0.40
  10   3   5    0.62    0.27
 -11  -3  -5    4.16    0.34
 -11  -3  -5    4.85    0.58
  11   3   5    4.53    0.46
 -12  -3  -5    4.19    0.36
 -12  -3  -5    4.39    0.56
  12   3   5    5.32    0.44
 -13  -3  -5    2.56    0.33
 -13  -3  -5    2.96    0.54
  13   3   5    3.43    0.45
  12  -4  -5    0.29    0.31
 -12   4   5    0.03    0.22
  11  -4  -5    2.67    0.42
 -11   4   5    2.05    0.28
  10  -4  -5    5.87    0.47
  10  -4  -5    6.49    0.49
 -10   4   5    5.85    0.35
   9  -4  -5    2.86    0.38
   9  -4  -5    2.70    0.38
  -9   4   5    2.75    0.27
   8  -4  -5    3.45    0.38
   8  -4  -5    3.85    0.39
  -8   4   5    3.37    0.28
   7  -4  -5   19.34    0.70
   7  -4  -5   21.37    0.72
  -7   4   5   20.62    0.62
  -7   4   5   20.30    0.62
   6  -4  -5   15.76    0.58
   6  -4  -5   15.77    0.59
  -6   4   5   15.97    0.53
  -6   4   5   16.41    0.49
  -6   4   5   15.85    0.50
   5  -4  -5   13.39    0.50
   5  -4  -5   13.07    0.50
  -5   4   5   14.29    0.46
  -5   4   5   12.57    0.39
  -5   4   5   12.10    0.43
   4  -4  -5   20.08    0.63
   4  -4  -5   19.61    0.61
  -4   4   5   20.49    0.60
  -4   4   5   20.10    0.51
  -4   4   5   20.23    0.57
   3  -4  -5    2.29    0.25
  -3   4   5    2.86    0.14
  -3   4   5    2.29    0.20
  -3   4   5    2.41    0.24
   2  -4  -5   64.96    1.58
  -2   4   5   64.76    1.50
  -2   4   5   68.15    1.45
  -2   4   5   67.03    1.53
   1  -4  -5  177.59    3.81
   1  -4  -5  169.93    3.84
  -1   4   5  167.83    3.66
  -1   4   5  176.01    3.80
  -1   4   5  177.25    3.75
   0  -4  -5  121.97    2.74
   0  -4  -5  121.66    2.73
   0   4   5  124.79    2.68
   0   4   5  120.42    2.60
   0   4   5  121.95    2.70
  -1  -4  -5    1.70    0.19
  -1  -4  -5    1.75    0.20
   1   4   5    1.73    0.17
   1   4   5    1.80    0.17
   1   4   5    1.75    0.16
  -2  -4  -5    0.38    0.17
  -2  -4  -5    0.75    0.16
   2   4   5    0.42    0.16
   2   4   5    0.22    0.11
   2   4   5    0.46    0.12
  -3  -4  -5   74.67    1.72
  -3  -4  -5   73.90    1.73
   3   4   5   73.15    1.62
   3   4   5   75.91    1.76
  -4  -4  -5  279.30    6.20
  -4  -4  -5  286.98    6.20
   4   4   5  294.84    5.95
   4   4   5  283.50    6.29
  -5  -4  -5   60.72    1.45
  -5  -4  -5   61.34    1.47
  -5  -4  -5   61.49    1.43
   5   4   5   61.00    1.55
   5   4   5   62.38    1.42
  -6  -4  -5    5.79    0.28
  -6  -4  -5    6.00    0.31
  -6  -4  -5    6.14    0.32
   6   4   5    5.65    0.30
   6   4   5    5.12    0.36
  -7  -4  -5    0.65    0.21
  -7  -4  -5    0.53    0.20
   7   4   5    0.43    0.26
   7   4   5    0.50    0.20
  -8  -4  -5   24.80    0.74
  -8  -4  -5   24.98    0.72
   8   4   5   23.82    0.76
   8   4   5   24.83    0.88
  -9  -4  -5   12.54    0.50
   9   4   5   11.78    0.63
   9   4   5   12.88    0.54
 -10  -4  -5    5.83    0.58
 -10  -4  -5    5.36    0.36
  10   4   5    5.81    0.39
  10   4   5    5.13    0.51
 -11  -4  -5    1.95    0.46
 -11  -4  -5    2.60    0.30
  11   4   5    2.34    0.36
 -12  -4  -5    0.23    0.23
 -12  -4  -5    0.11    0.40
  12   4   5    0.56    0.32
 -13  -4  -5    1.04    0.47
 -13  -4  -5    0.32    0.25
  13   4   5    0.14    0.32
  12  -5  -5    0.20    0.34
 -12   5   5    0.06    0.25
  11  -5  -5    0.04    0.31
 -11   5   5   -0.16    0.22
  10  -5  -5    1.26    0.36
  10  -5  -5    1.52    0.36
 -10   5   5    1.44    0.27
   9  -5  -5   10.38    0.57
   9  -5  -5   11.72    0.58
  -9   5   5   10.63    0.48
   8  -5  -5   16.05    0.67
  -8   5   5   17.01    0.59
   7  -5  -5    3.28    0.38
   7  -5  -5    4.64    0.36
  -7   5   5    4.29    0.31
  -7   5   5    4.34    0.30
   6  -5  -5    0.22    0.22
   6  -5  -5    0.10    0.23
  -6   5   5    0.25    0.18
  -6   5   5    0.09    0.17
   5  -5  -5    1.45    0.25
   5  -5  -5    1.57    0.24
  -5   5   5    1.61    0.22
  -5   5   5    1.22    0.19
  -5   5   5    1.41    0.18
   4  -5  -5   22.27    0.69
   4  -5  -5   22.85    0.68
  -4   5   5   22.01    0.64
  -4   5   5   22.58    0.58
   3  -5  -5   77.86    1.80
   3  -5  -5   80.01    1.88
  -3   5   5   79.23    1.77
  -3   5   5   80.72    1.83
  -3   5   5   78.41    1.80
   2  -5  -5   60.10    1.45
   2  -5  -5   58.81    1.40
  -2   5   5   58.00    1.37
  -2   5   5   61.14    1.35
  -2   5   5   58.40    1.40
   1  -5  -5    1.63    0.23
   1  -5  -5    1.41    0.19
  -1   5   5    1.47    0.15
  -1   5   5    1.29    0.17
  -1   5   5    1.51    0.18
   0  -5  -5  190.61    4.28
   0  -5  -5  198.01    4.31
   0   5   5  192.59    4.08
   0   5   5  199.23    4.25
  -1  -5  -5  176.26    3.81
  -1  -5  -5  168.96    3.82
   1   5   5  173.35    3.80
   1   5   5  175.88    3.78
   1   5   5  168.81    3.61
  -2  -5  -5   61.96    1.49
  -2  -5  -5   62.05    1.49
   2   5   5   61.96    1.37
   2   5   5   63.94    1.49
   2   5   5   63.20    1.44
  -3  -5  -5   67.18    1.57
  -3  -5  -5   64.34    1.55
   3   5   5   66.94    1.45
   3   5   5   65.11    1.58
  -4  -5  -5    0.78    0.18
  -4  -5  -5    0.89    0.21
   4   5   5    0.71    0.23
   4   5   5    0.84    0.16
  -5  -5  -5   47.77    1.15
  -5  -5  -5   47.97    1.19
  -5  -5  -5   48.00    1.19
   5   5   5   45.87    1.25
   5   5   5   48.16    1.12
  -6  -5  -5   39.99    0.97
  -6  -5  -5   39.43    1.01
  -6  -5  -5   39.42    1.02
   6   5   5   36.68    1.09
   6   5   5   39.02    0.98
  -7  -5  -5   46.13    1.17
  -7  -5  -5   45.15    1.16
   7   5   5   45.56    1.28
   7   5   5   43.77    1.12
  -8  -5  -5   11.25    0.46
  -8  -5  -5   11.13    0.48
   8   5   5   11.00    0.47
   8   5   5   10.08    0.58
  -9  -5  -5    1.18    0.27
  -9  -5  -5    1.05    0.24
   9   5   5    0.63    0.34
   9   5   5    0.74    0.25
 -10  -5  -5    6.12    0.38
  10   5   5    6.19    0.48
  10   5   5    6.74    0.42
 -11  -5  -5    3.74    0.34
  11   5   5    2.93    0.44
  11   5   5    4.04    0.41
 -12  -5  -5    2.61    0.53
 -12  -5  -5    1.93    0.29
  12   5   5    2.33    0.37
 -13  -5  -5    1.56    0.28
 -13  -5  -5    1.65    0.50
  12  -6  -5    0.45    0.36
 -12   6   5    0.68    0.28
  11  -6  -5    1.08    0.37
 -11   6   5    0.57    0.26
  10  -6  -5    2.25    0.40
 -10   6   5    2.33    0.32
   9  -6  -5    0.48    0.31
   9  -6  -5    0.80    0.31
  -9   6   5    0.80    0.25
   8  -6  -5    7.33    0.45
   8  -6  -5    7.38    0.48
  -8   6   5    7.11    0.41
   7  -6  -5   24.02    0.78
   7  -6  -5   23.75    0.81
  -7   6   5   23.76    0.72
  -7   6   5   22.34    0.73
   6  -6  -5   19.71    0.71
   6  -6  -5   22.03    0.72
  -6   6   5   21.40    0.64
  -6   6   5   21.01    0.68
   5  -6  -5   10.35    0.47
   5  -6  -5    9.99    0.46
  -5   6   5   10.69    0.43
  -5   6   5   10.55    0.39
   4  -6  -5    1.09    0.24
   4  -6  -5    0.87    0.20
  -4   6   5    1.03    0.20
  -4   6   5    1.15    0.18
   3  -6  -5    3.04    0.27
   3  -6  -5    2.80    0.29
  -3   6   5    2.79    0.25
  -3   6   5    2.89    0.21
   2  -6  -5   37.41    1.02
   2  -6  -5   41.83    1.08
  -2   6   5   41.86    0.98
  -2   6   5   40.65    1.00
  -2   6   5   39.69    1.02
   1  -6  -5  144.04    3.13
   1  -6  -5  136.22    3.15
  -1   6   5  139.30    3.08
  -1   6   5  140.94    2.98
  -1   6   5  136.58    3.10
   0  -6  -5  115.43    2.68
   0  -6  -5  117.54    2.70
   0   6   5  117.80    2.53
   0   6   5  119.77    2.65
   0   6   5  121.03    2.66
  -1  -6  -5    8.58    0.39
  -1  -6  -5    7.49    0.35
   1   6   5    7.93    0.29
   1   6   5    8.26    0.33
  -2  -6  -5   30.50    0.84
  -2  -6  -5   30.61    0.85
   2   6   5   31.95    0.74
   2   6   5   32.61    0.84
  -3  -6  -5   75.78    1.77
  -3  -6  -5   72.27    1.75
   3   6   5   74.49    1.61
   3   6   5   74.87    1.78
  -4  -6  -5   99.99    2.36
  -4  -6  -5  103.13    2.38
   4   6   5  105.94    2.21
   4   6   5  103.30    2.42
  -5  -6  -5   19.47    0.63
  -5  -6  -5   18.68    0.60
  -5  -6  -5   20.71    0.57
   5   6   5   18.94    0.53
   5   6   5   18.76    0.65
  -6  -6  -5    1.75    0.23
  -6  -6  -5    1.41    0.26
   6   6   5    2.02    0.22
   6   6   5    1.52    0.28
  -7  -6  -5   13.67    0.54
  -7  -6  -5   13.22    0.50
   7   6   5   13.01    0.62
   7   6   5   14.34    0.48
  -8  -6  -5   26.66    0.82
  -8  -6  -5   25.96    0.78
   8   6   5   23.85    0.88
   8   6   5   26.45    0.76
  -9  -6  -5   21.04    0.70
  -9  -6  -5   22.67    0.74
   9   6   5   20.39    0.68
   9   6   5   20.61    0.83
 -10  -6  -5    5.59    0.38
  10   6   5    5.64    0.48
  10   6   5    6.52    0.41
 -11  -6  -5    0.00    0.22
  11   6   5    0.13    0.32
 -12  -6  -5   -0.25    0.21
  12   6   5   -0.03    0.35
 -13  -6  -5    0.34    0.24
 -13  -6  -5    0.52    0.46
  12  -7  -5   -0.19    0.31
 -12   7   5   -0.18    0.29
  11  -7  -5    0.36    0.36
 -11   7   5   -0.40    0.24
  10  -7  -5    0.58    0.33
 -10   7   5    0.89    0.29
   9  -7  -5    7.37    0.51
  -9   7   5    7.33    0.46
   8  -7  -5    9.18    0.53
   8  -7  -5    9.99    0.52
  -8   7   5    9.19    0.48
   7  -7  -5    0.60    0.26
   7  -7  -5    0.49    0.26
  -7   7   5    0.39    0.23
  -7   7   5    0.53    0.27
   6  -7  -5    1.32    0.29
   6  -7  -5    0.27    0.25
  -6   7   5    0.22    0.22
  -6   7   5    0.19    0.21
   5  -7  -5   12.26    0.52
   5  -7  -5   12.20    0.51
  -5   7   5   13.06    0.46
  -5   7   5   12.48    0.50
   4  -7  -5   28.14    0.80
   4  -7  -5   26.89    0.82
  -4   7   5   27.50    0.75
  -4   7   5   25.64    0.78
   3  -7  -5   27.19    0.82
   3  -7  -5   27.34    0.76
  -3   7   5   26.82    0.78
  -3   7   5   27.64    0.74
   2  -7  -5    7.45    0.36
   2  -7  -5    7.43    0.41
  -2   7   5    8.19    0.34
  -2   7   5    7.94    0.36
  -2   7   5    8.55    0.34
   1  -7  -5   13.96    0.53
   1  -7  -5   13.54    0.49
  -1   7   5   13.92    0.45
  -1   7   5   14.02    0.48
  -1   7   5   13.32    0.46
   0  -7  -5   59.25    1.48
   0  -7  -5   58.84    1.46
   0   7   5   59.85    1.34
   0   7   5   58.58    1.43
   0   7   5   59.50    1.42
  -1  -7  -5   91.85    2.18
  -1  -7  -5   89.86    2.16
   1   7   5   93.98    2.00
   1   7   5   93.07    2.15
   1   7   5   94.94    2.13
  -2  -7  -5   29.27    0.83
  -2  -7  -5   28.21    0.81
   2   7   5   28.47    0.81
   2   7   5   28.25    0.68
   2   7   5   30.08    0.78
  -3  -7  -5    3.52    0.29
  -3  -7  -5    3.46    0.31
   3   7   5    3.07    0.27
   3   7   5    3.51    0.18
  -4  -7  -5    5.52    0.35
  -4  -7  -5    5.50    0.30
   4   7   5    5.69    0.37
   4   7   5    5.75    0.23
  -5  -7  -5   36.31    1.02
  -5  -7  -5   37.33    0.99
   5   7   5   36.51    0.87
   5   7   5   35.73    1.04
  -6  -7  -5   36.90    1.00
  -6  -7  -5   37.83    1.04
   6   7   5   36.26    1.09
   6   7   5   36.55    0.90
  -7  -7  -5   20.08    0.70
  -7  -7  -5   20.40    0.66
   7   7   5   19.50    0.75
   7   7   5   20.65    0.59
  -8  -7  -5    1.15    0.31
  -8  -7  -5    1.00    0.24
   8   7   5    1.30    0.23
   8   7   5    0.78    0.34
  -9  -7  -5    3.67    0.39
  -9  -7  -5    3.24    0.33
   9   7   5    3.69    0.32
   9   7   5    2.83    0.44
 -10  -7  -5    7.33    0.42
 -10  -7  -5    7.33    0.48
  10   7   5    7.94    0.57
 -11  -7  -5    3.21    0.34
  11   7   5    3.28    0.48
 -12  -7  -5    0.28    0.23
  12   7   5    0.54    0.38
 -13  -7  -5    0.11    0.23
  13   7   5    0.16    0.38
  11  -8  -5    1.00    0.40
 -11   8   5    0.67    0.31
  10  -8  -5    0.78    0.34
 -10   8   5    0.47    0.29
   9  -8  -5    0.15    0.29
  -9   8   5   -0.21    0.27
   8  -8  -5    3.98    0.43
   8  -8  -5    3.60    0.39
  -8   8   5    2.53    0.33
   7  -8  -5    7.73    0.45
   7  -8  -5    7.27    0.46
  -7   8   5    7.87    0.44
  -7   8   5    7.47    0.45
   6  -8  -5    3.62    0.37
   6  -8  -5    3.65    0.36
  -6   8   5    3.25    0.33
  -6   8   5    2.71    0.32
   5  -8  -5   -0.06    0.21
   5  -8  -5    0.11    0.24
  -5   8   5   -0.10    0.21
  -5   8   5   -0.16    0.19
   4  -8  -5    6.03    0.39
   4  -8  -5    6.11    0.36
  -4   8   5    5.97    0.38
  -4   8   5    6.71    0.36
   3  -8  -5   25.27    0.73
   3  -8  -5   26.22    0.82
  -3   8   5   25.12    0.74
  -3   8   5   25.17    0.76
   2  -8  -5   60.42    1.52
   2  -8  -5   59.24    1.49
   2  -8  -5   60.03    1.40
  -2   8   5   59.33    1.45
  -2   8   5   59.84    1.41
  -2   8   5   58.42    1.47
   1  -8  -5   36.62    1.04
   1  -8  -5   36.51    1.02
  -1   8   5   37.99    0.99
  -1   8   5   38.59    0.93
  -1   8   5   38.09    1.01
   0  -8  -5   10.79    0.46
   0  -8  -5   10.62    0.48
   0   8   5   10.06    0.42
   0   8   5   10.64    0.36
   0   8   5   10.73    0.42
  -1  -8  -5    7.46    0.39
  -1  -8  -5    7.66    0.39
   1   8   5    8.14    0.29
   1   8   5    8.70    0.38
   1   8   5    8.18    0.38
  -2  -8  -5   66.73    1.60
  -2  -8  -5   62.55    1.60
   2   8   5   63.82    1.59
   2   8   5   63.88    1.39
  -3  -8  -5   93.22    2.21
  -3  -8  -5   92.37    2.24
   3   8   5   93.05    2.23
   3   8   5   96.83    1.98
  -4  -8  -5   60.12    1.59
  -4  -8  -5   63.53    1.57
   4   8   5   66.76    1.38
   4   8   5   62.59    1.61
  -5  -8  -5    0.60    0.26
  -5  -8  -5    0.74    0.21
   5   8   5    0.72    0.14
   5   8   5    0.80    0.26
  -6  -8  -5    3.42    0.37
  -6  -8  -5    3.43    0.31
   6   8   5    3.03    0.20
   6   8   5    2.41    0.36
  -7  -8  -5   15.58    0.62
  -7  -8  -5   15.12    0.57
   7   8   5   13.14    0.63
  -8  -8  -5   21.76    0.72
  -8  -8  -5   22.17    0.77
   8   8   5   21.53    0.85
  -9  -8  -5    5.83    0.45
  -9  -8  -5    4.69    0.36
   9   8   5    4.28    0.47
 -10  -8  -5    1.33    0.27
 -10  -8  -5    1.81    0.37
  10   8   5    1.50    0.37
 -11  -8  -5    0.20    0.24
  11   8   5    0.12    0.33
 -12  -8  -5    0.91    0.27
  12   8   5    1.08    0.41
 -13  -8  -5    0.86    0.28
  13   8   5    0.65    0.42
  11  -9  -5    0.43    0.36
 -11   9   5    0.36    0.33
  10  -9  -5    1.37    0.40
 -10   9   5    1.15    0.35
   9  -9  -5    3.37    0.47
  -9   9   5    3.40    0.41
   8  -9  -5    2.28    0.38
  -8   9   5    2.08    0.35
   7  -9  -5   -0.15    0.27
   7  -9  -5   -0.04    0.26
  -7   9   5    0.11    0.26
  -7   9   5    0.42    0.28
   6  -9  -5    7.82    0.48
   6  -9  -5    7.09    0.45
  -6   9   5    7.29    0.43
  -6   9   5    7.46    0.44
   5  -9  -5   14.30    0.59
   5  -9  -5   13.88    0.59
  -5   9   5   12.04    0.55
  -5   9   5   14.31    0.56
   4  -9  -5   15.03    0.57
   4  -9  -5   14.88    0.62
  -4   9   5   14.62    0.60
  -4   9   5   14.12    0.56
   3  -9  -5    9.45    0.49
   3  -9  -5   10.16    0.43
  -3   9   5   10.26    0.47
  -3   9   5   10.30    0.45
   2  -9  -5    3.72    0.36
   2  -9  -5    3.93    0.28
   2  -9  -5    4.04    0.35
  -2   9   5    3.34    0.29
  -2   9   5    3.82    0.33
  -2   9   5    3.92    0.31
   1  -9  -5   36.81    1.05
   1  -9  -5   36.69    1.03
  -1   9   5   36.21    1.00
  -1   9   5   35.71    0.91
  -1   9   5   35.91    0.99
   0  -9  -5   65.01    1.68
   0  -9  -5   67.02    1.70
   0   9   5   68.40    1.65
   0   9   5   67.89    1.51
   0   9   5   67.59    1.66
  -1  -9  -5   43.31    1.22
  -1  -9  -5   45.20    1.22
   1   9   5   47.76    1.19
   1   9   5   45.92    1.04
   1   9   5   44.97    1.20
  -2  -9  -5    4.44    0.32
  -2  -9  -5    5.11    0.37
   2   9   5    4.40    0.28
   2   9   5    4.49    0.20
   2   9   5    4.59    0.32
  -3  -9  -5    0.04    0.24
  -3  -9  -5   -0.09    0.19
   3   9   5   -0.07    0.20
   3   9   5   -0.01    0.09
  -4  -9  -5   33.11    0.98
  -4  -9  -5   31.56    0.94
   4   9   5   32.19    0.97
  -5  -9  -5   47.60    1.32
  -5  -9  -5   47.04    1.27
   5   9   5   48.21    1.34
  -6  -9  -5   27.45    0.90
  -6  -9  -5   26.56    0.83
   6   9   5   25.72    0.91
  -7  -9  -5   17.84    0.66
  -7  -9  -5   18.33    0.71
   7   9   5   18.34    0.75
  -8  -9  -5    0.29    0.22
  -8  -9  -5    0.20    0.29
   8   9   5    0.45    0.31
  -9  -9  -5    4.02    0.44
  -9  -9  -5    3.92    0.35
   9   9   5    3.78    0.48
 -10  -9  -5    4.30    0.36
 -10  -9  -5    4.63    0.48
  10   9   5    3.55    0.49
 -11  -9  -5    0.85    0.40
 -11  -9  -5    0.85    0.26
  11   9   5    0.87    0.40
 -12  -9  -5   -0.06    0.23
  12   9   5   -0.15    0.35
 -13  -9  -5   -0.02    0.25
  10 -10  -5   -0.34    0.33
 -10  10   5   -0.14    0.30
   9 -10  -5    0.04    0.32
  -9  10   5   -0.01    0.30
   8 -10  -5    3.54    0.45
  -8  10   5    3.71    0.44
   7 -10  -5    5.99    0.46
   7 -10  -5    7.14    0.46
  -7  10   5    7.29    0.50
   6 -10  -5    2.90    0.36
   6 -10  -5    2.74    0.36
  -6  10   5    2.63    0.36
  -6  10   5    1.90    0.33
   5 -10  -5    0.87    0.26
   5 -10  -5    0.66    0.30
  -5  10   5    0.83    0.28
  -5  10   5    0.99    0.29
   4 -10  -5    4.33    0.38
   4 -10  -5    4.40    0.36
  -4  10   5    4.53    0.39
  -4  10   5    4.39    0.39
   3 -10  -5   21.36    0.68
   3 -10  -5   20.87    0.75
  -3  10   5   20.42    0.73
  -3  10   5   21.37    0.74
   2 -10  -5   34.86    1.06
   2 -10  -5   36.41    0.94
  -2  10   5   35.21    1.02
  -2  10   5   35.39    1.03
  -2  10   5   35.49    0.94
   1 -10  -5   12.41    0.57
   1 -10  -5   13.77    0.58
  -1  10   5   12.39    0.55
  -1  10   5   14.07    0.47
  -1  10   5   13.16    0.53
   0 -10  -5    0.26    0.25
   0 -10  -5    0.06    0.20
   0  10   5    0.22    0.21
   0  10   5    0.22    0.16
   0  10   5    0.14    0.23
  -1 -10  -5   36.77    1.06
  -1 -10  -5   36.29    1.07
   1  10   5   34.96    1.02
   1  10   5   36.51    1.01
   1  10   5   37.11    0.86
  -2 -10  -5   44.92    1.28
  -2 -10  -5   49.43    1.29
   2  10   5   45.74    1.26
   2  10   5   45.21    1.02
  -3 -10  -5   41.53    1.18
  -3 -10  -5   41.87    1.21
   3  10   5   44.73    1.22
  -4 -10  -5   16.48    0.65
  -4 -10  -5   16.42    0.68
   4  10   5   18.30    0.69
  -5 -10  -5    1.20    0.33
  -5 -10  -5    1.01    0.26
   5  10   5    0.97    0.33
  -6 -10  -5    4.50    0.39
  -6 -10  -5    4.71    0.46
   6  10   5    4.80    0.48
  -7 -10  -5   16.84    0.65
  -7 -10  -5   16.74    0.71
   7  10   5   16.75    0.75
  -8 -10  -5   14.35    0.61
  -8 -10  -5   15.66    0.71
   8  10   5   14.80    0.73
  -9 -10  -5    4.16    0.46
  -9 -10  -5    3.48    0.36
   9  10   5    3.32    0.47
 -10 -10  -5    0.06    0.35
 -10 -10  -5   -0.02    0.23
  10  10   5    0.20    0.33
 -11 -10  -5    1.48    0.30
 -11 -10  -5    1.75    0.43
  11  10   5    0.96    0.41
 -12 -10  -5    0.77    0.28
  12  10   5    0.86    0.41
  10 -11  -5    0.83    0.38
 -10  11   5    0.72    0.38
   9 -11  -5    1.03    0.38
  -9  11   5    1.56    0.40
   8 -11  -5    0.00    0.32
  -8  11   5    0.14    0.30
   7 -11  -5    1.28    0.34
  -7  11   5    1.44    0.36
   6 -11  -5    9.99    0.54
   6 -11  -5   10.29    0.54
  -6  11   5   10.75    0.60
  -6  11   5   10.65    0.58
   5 -11  -5   16.70    0.66
   5 -11  -5   15.85    0.67
  -5  11   5   15.99    0.67
  -5  11   5   14.99    0.69
   4 -11  -5    5.90    0.46
   4 -11  -5    6.22    0.39
  -4  11   5    6.08    0.43
  -4  11   5    6.08    0.46
   3 -11  -5    1.01    0.31
   3 -11  -5    1.43    0.26
  -3  11   5    1.22    0.31
  -3  11   5    1.07    0.28
   2 -11  -5    2.11    0.35
  -2  11   5    1.94    0.27
  -2  11   5    2.43    0.34
  -2  11   5    1.89    0.30
   1 -11  -5   25.09    0.88
   1 -11  -5   26.89    0.88
  -1  11   5   23.81    0.71
  -1  11   5   26.03    0.83
  -1  11   5   23.65    0.82
   0 -11  -5   41.40    1.22
   0 -11  -5   41.25    1.20
   0  11   5   41.21    1.01
   0  11   5   42.41    1.16
  -1 -11  -5   15.18    0.64
  -1 -11  -5   14.26    0.61
   1  11   5   14.02    0.61
  -2 -11  -5    0.29    0.30
  -2 -11  -5    0.75    0.26
   2  11   5    0.26    0.27
  -3 -11  -5    6.07    0.44
  -3 -11  -5    5.79    0.46
   3  11   5    6.26    0.45
  -4 -11  -5   31.17    1.01
  -4 -11  -5   29.44    0.95
   4  11   5   30.25    0.99
  -5 -11  -5   21.27    0.83
  -5 -11  -5   21.86    0.78
   5  11   5   21.41    0.82
  -6 -11  -5   14.65    0.63
  -6 -11  -5   15.75    0.71
   6  11   5   14.94    0.70
  -7 -11  -5    3.44    0.37
  -7 -11  -5    3.35    0.44
   7  11   5    3.39    0.46
  -8 -11  -5    0.02    0.32
  -8 -11  -5    0.16    0.23
   8  11   5    0.32    0.35
  -9 -11  -5    2.77    0.35
  -9 -11  -5    3.09    0.45
   9  11   5    2.37    0.45
 -10 -11  -5    4.39    0.42
 -10 -11  -5    3.99    0.52
  10  11   5    3.67    0.52
 -11 -11  -5    0.31    0.27
 -11 -11  -5    0.82    0.42
  11  11   5   -0.33    0.33
 -12 -11  -5   -0.02    0.26
  12  11   5   -0.46    0.37
   9 -12  -5   -0.02    0.31
  -9  12   5   -0.03    0.34
   8 -12  -5    2.69    0.44
  -8  12   5    2.40    0.44
   7 -12  -5    2.04    0.38
  -7  12   5    2.55    0.42
   6 -12  -5    0.32    0.29
   6 -12  -5    0.33    0.31
  -6  12   5    0.82    0.34
  -6  12   5    0.10    0.32
   5 -12  -5    1.28    0.33
   5 -12  -5    1.92    0.33
  -5  12   5    1.53    0.35
  -5  12   5    1.57    0.37
   4 -12  -5   13.49    0.62
   4 -12  -5   11.00    0.52
  -4  12   5   12.64    0.64
  -4  12   5   11.44    0.63
   3 -12  -5   14.33    0.65
   3 -12  -5   15.59    0.58
  -3  12   5   15.15    0.66
  -3  12   5   15.15    0.68
   2 -12  -5   14.82    0.67
  -2  12   5   15.32    0.66
  -2  12   5   15.09    0.67
  -2  12   5   14.68    0.54
   1 -12  -5    8.19    0.55
  -1  12   5    7.43    0.49
  -1  12   5    8.08    0.49
  -1  12   5    8.16    0.38
   0 -12  -5    0.66    0.31
   0 -12  -5    0.34    0.27
   0  12   5    0.18    0.29
  -1 -12  -5   11.87    0.61
  -1 -12  -5   12.56    0.59
   1  12   5   11.73    0.59
  -2 -12  -5   16.18    0.70
  -2 -12  -5   16.45    0.71
   2  12   5   15.43    0.65
  -3 -12  -5   13.67    0.62
  -3 -12  -5   13.77    0.66
   3  12   5   12.83    0.62
  -4 -12  -5    0.29    0.31
  -4 -12  -5   -0.23    0.24
   4  12   5   -0.18    0.29
  -5 -12  -5    1.65    0.30
  -5 -12  -5    1.26    0.37
   5  12   5    1.65    0.35
  -6 -12  -5    3.12    0.37
  -6 -12  -5    2.79    0.43
   6  12   5    1.97    0.38
  -7 -12  -5    4.39    0.42
  -7 -12  -5    4.36    0.50
   7  12   5    4.49    0.49
  -8 -12  -5    3.00    0.48
  -8 -12  -5    2.20    0.35
   8  12   5    2.87    0.44
  -9 -12  -5    0.39    0.28
  -9 -12  -5    0.58    0.38
   9  12   5    0.19    0.37
 -10 -12  -5    1.18    0.44
 -10 -12  -5    1.12    0.30
  10  12   5    0.81    0.42
 -11 -12  -5    2.68    0.38
 -11 -12  -5    3.49    0.54
  11  12   5    2.56    0.51
   8 -13  -5   -0.16    0.29
  -8  13   5   -0.06    0.35
   7 -13  -5    2.34    0.41
  -7  13   5    1.74    0.42
   6 -13  -5    5.57    0.48
  -6  13   5    6.14    0.56
  -6  13   5    5.36    0.56
   5 -13  -5    5.22    0.47
   5 -13  -5    4.57    0.46
  -5  13   5    4.37    0.48
  -5  13   5    4.86    0.51
   4 -13  -5    0.35    0.26
   4 -13  -5    1.13    0.35
  -4  13   5    1.13    0.36
[truncated: 4,376,306 more chars]
